# Supplementary material
Source: publisher figshare collection journal article supplement (https://acs.figshare.com/ndownloader/files/8357165)
Supplement: Supplementary file 1 [file 8357165]

data_jw18282
_audit_creation_date              2016-10-30
_audit_creation_method
;
Olex2 1.2
(compiled 2016.09.09 svn.r3337 for OlexSys, GUI svn.r5227)
;
_publ_contact_author_address      ?
_publ_contact_author_email        ?
_publ_contact_author_id_orcid     ?
_publ_contact_author_name         ''
_publ_contact_author_phone        ?
_publ_section_references
;
Dolomanov, O.V., Bourhis, L.J., Gildea, R.J, Howard, J.A.K. & Puschmann, H.
 (2009), J. Appl. Cryst. 42, 339-341.

Sheldrick, G.M. (2008). Acta Cryst. A64, 112-122.

Sheldrick, G.M. (2015). Acta Cryst. C71, 3-8.
;
_chemical_name_common             ?
_chemical_name_systematic         ?
_chemical_formula_moiety          '2(C20 H8 N6 S3), 1(C60), 1(C9 H12)'
_chemical_formula_sum             'C109 H28 N12 S6'
_chemical_formula_weight          1698.00
_chemical_melting_point           ?
loop_
  _atom_type_symbol
  _atom_type_description
  _atom_type_scat_dispersion_real
  _atom_type_scat_dispersion_imag
  _atom_type_scat_source
 'C' 'C' 0.0140 0.0070 'International Tables Vol C Tables 4.2.6.8 and 6.1.1.4'
 'H' 'H' 0.0000 0.0000 'International Tables Vol C Tables 4.2.6.8 and 6.1.1.4'
 'N' 'N' 0.0250 0.0140 'International Tables Vol C Tables 4.2.6.8 and 6.1.1.4'
 'S' 'S' 0.2920 0.4250 'International Tables Vol C Tables 4.2.6.8 and 6.1.1.4'

_shelx_space_group_comment
;
The symmetry employed for this shelxl refinement is uniquely defined
by the following loop, which should always be used as a source of
symmetry information in preference to the above space-group names.
They are only intended as comments.
;
_space_group_crystal_system       'cubic'
_space_group_IT_number            205
_space_group_name_H-M_alt         'P a -3'
_space_group_name_Hall            '-P 2ac 2ab 3'
loop_
  _space_group_symop_operation_xyz
 'x, y, z'
 '-x+1/2, -y, z+1/2'
 '-x, y+1/2, -z+1/2'
 'x+1/2, -y+1/2, -z'
 'z, x, y'
 'z+1/2, -x+1/2, -y'
 '-z+1/2, -x, y+1/2'
 '-z, x+1/2, -y+1/2'
 'y, z, x'
 '-y, z+1/2, -x+1/2'
 'y+1/2, -z+1/2, -x'
 '-y+1/2, -z, x+1/2'
 '-x, -y, -z'
 'x-1/2, y, -z-1/2'
 'x, -y-1/2, z-1/2'
 '-x-1/2, y-1/2, z'
 '-z, -x, -y'
 '-z-1/2, x-1/2, y'
 'z-1/2, x, -y-1/2'
 'z, -x-1/2, y-1/2'
 '-y, -z, -x'
 'y, -z-1/2, x-1/2'
 '-y-1/2, z-1/2, x'
 'y-1/2, z, -x-1/2'

_cell_length_a                    18.9035(9)
_cell_length_b                    18.9035(9)
_cell_length_c                    18.9035(9)
_cell_angle_alpha                 90
_cell_angle_beta                  90
_cell_angle_gamma                 90
_cell_volume                      6755.0(10)
_cell_formula_units_Z             4
_cell_measurement_reflns_used     9819
_cell_measurement_temperature     100
_cell_measurement_theta_max       60.635
_cell_measurement_theta_min       4.552
_shelx_estimated_absorpt_T_max    0.969
_shelx_estimated_absorpt_T_min    0.761
_exptl_absorpt_coefficient_mu     1.604
_exptl_absorpt_correction_T_max   0.4146
_exptl_absorpt_correction_T_min   0.3312
_exptl_absorpt_correction_type    multi-scan
_exptl_absorpt_process_details
;
SADABS-2016/2 (Bruker,2016/2) was used for absorption correction.
wR2(int) was 0.1149 before and 0.0908 after correction.
The Ratio of minimum to maximum transmission is 0.7988.
The \l/2 correction factor is Not present.
;
_exptl_absorpt_special_details    ?
_exptl_crystal_colour             'metallic dark brown'
_exptl_crystal_colour_lustre      metallic
_exptl_crystal_colour_modifier    dark
_exptl_crystal_colour_primary     brown
_exptl_crystal_density_diffrn     1.670
_exptl_crystal_density_meas       ?
_exptl_crystal_density_method     ?
_exptl_crystal_description        Block
_exptl_crystal_F_000              3448
_exptl_crystal_size_max           0.18
_exptl_crystal_size_mid           0.16
_exptl_crystal_size_min           0.02
_exptl_special_details
;
X-ray crystallographic data for I were collected from a single crystal
sample, which was mounted on a loop fiber. Data were collected using
a Bruker Venture diffractometer equipped with a Photon 100 CMOS Detector,
a Helios MX optics and a Kappa goniometer. The crystal-to-detector distance 
was 4.0 cm, and the data collection was carried out in 1024 x 1024 pixel mode.
;
_exptl_transmission_factor_max    ?
_exptl_transmission_factor_min    ?
_diffrn_reflns_av_R_equivalents   ?
_diffrn_reflns_av_unetI/netI      0.0986
_diffrn_reflns_Laue_measured_fraction_full 0.999
_diffrn_reflns_Laue_measured_fraction_max 0.999
_diffrn_reflns_limit_h_max        24
_diffrn_reflns_limit_h_min        -24
_diffrn_reflns_limit_k_max        24
_diffrn_reflns_limit_k_min        -24
_diffrn_reflns_limit_l_max        24
_diffrn_reflns_limit_l_min        -24
_diffrn_reflns_number             91208
_diffrn_reflns_point_group_measured_fraction_full 0.999
_diffrn_reflns_point_group_measured_fraction_max 0.999
_diffrn_reflns_theta_full         53.594
_diffrn_reflns_theta_max          60.604
_diffrn_reflns_theta_min          4.069
_diffrn_ambient_temperature       100
_diffrn_detector                  'CMOS Area detector'
_diffrn_detector_area_resol_mean  10.24
_diffrn_detector_type             'Bruker Photon 100 CMOS Detector'
_diffrn_measured_fraction_theta_full 0.999
_diffrn_measured_fraction_theta_max 0.999
_diffrn_measurement_device        'k-geometry diffractometer'
_diffrn_measurement_device_type   'Bruker Venture Metaljet'
_diffrn_measurement_method        '\w and \f scans'
_diffrn_radiation_collimation     'Focusing mirrors'
_diffrn_radiation_monochromator   'Helios MX Mirror Optics'
_diffrn_radiation_probe           X-ray
_diffrn_radiation_type            GaK\a
_diffrn_radiation_wavelength      1.34139
_diffrn_source                    'Metal Jet'
_diffrn_source_target             Ga
_diffrn_source_type               'Gallium Liquid Metal Jet Source'
_reflns_Friedel_coverage          0.000
_reflns_Friedel_fraction_full     .
_reflns_Friedel_fraction_max      .
_reflns_number_gt                 75409
_reflns_number_total              91208
_reflns_special_details
;
 _reflns_Friedel_fraction is defined as the number of unique
 Friedel pairs measured divided by the number that would be
 possible theoretically, ignoring centric projections and
 systematic absences.
;
_reflns_threshold_expression      'I > 2\s(I)'
_computing_cell_refinement
;
SAINT (2013) V8.37A; Integration Software for Single Crystal Data.
Bruker AXS Inc., Madison, WI 53719-1173.
;
_computing_data_collection
;
APEX 2 (2013) Bruker AXS Inc., Madison, WI 53719-1173.
;
_computing_data_reduction
;
SAINT (2013) V8.37A; Integration Software for Single Crystal Data.
Bruker AXS Inc., Madison, WI 53719-1173.
;
_computing_molecular_graphics     'Olex2 (Dolomanov et al., 2009)'
_computing_publication_material   'Olex2 (Dolomanov et al., 2009)'
_computing_structure_refinement   'ShelXL (Sheldrick, 2015)'
_computing_structure_solution     'XM (Sheldrick, 2008)'
_refine_diff_density_max          1.153
_refine_diff_density_min          -0.793
_refine_diff_density_rms          0.213
_refine_ls_extinction_coef        .
_refine_ls_extinction_method      none
_refine_ls_goodness_of_fit_ref    1.083
_refine_ls_hydrogen_treatment     constr
_refine_ls_matrix_type            full
_refine_ls_number_parameters      216
_refine_ls_number_reflns          91208
_refine_ls_number_restraints      358
_refine_ls_R_factor_all           0.1284
_refine_ls_R_factor_gt            0.1142
_refine_ls_restrained_S_all       1.115
_refine_ls_shift/su_max           0.000
_refine_ls_shift/su_mean          0.000
_refine_ls_structure_factor_coef  Fsqd
_refine_ls_weighting_details
'w=1/[\s^2^(Fo^2^)+(0.0428P)^2^+12.7214P] where P=(Fo^2^+2Fc^2^)/3'
_refine_ls_weighting_scheme       calc
_refine_ls_wR_factor_gt           0.2762
_refine_ls_wR_factor_ref          0.2868
_refine_special_details
;
 Refined as a 2-component twin.
;
_olex2_refinement_description
;
1. Twinned data refinement
 Scales: 0.0152(14) 0.9848(14)
2. Fixed Uiso
 At 1.2 times of:
  All C(H) groups, All C(H,H) groups
 At 1.5 times of:
  All C(H,H,H) groups
3. Restrained distances
 C10-C16 = C12-C17 = C14-C18
 1.54 with sigma of 0.001
 N1A-S1A \\sim N2A-S1A \\sim N1B-S1B \\sim N2B-S1B
 with sigma of 0.001
 C3A-S1A \\sim C4A-S1A \\sim C1B-S1B \\sim C2B-S1B
 with sigma of 0.002
 C16-C11 \\sim C16-C15 \\sim C11-C17 \\sim C13-C17 \\sim C13-C18 \\sim C15-C18
 with sigma of 0.002
4. Rigid bond restraints
 C1A, C2A, C3A, C4A, C5A, C6A
 with sigma for 1-2 distances of 0.002 and sigma for 1-3 distances of 0.001
 C1B, C2B, C3B, C4B, C5B, C6B
 with sigma for 1-2 distances of 0.002 and sigma for 1-3 distances of 0.001
 C10, C11, C12, C13, C14, C15, C16, C17, C18
 with sigma for 1-2 distances of 0.005 and sigma for 1-3 distances of 0.005
5. Uiso/Uaniso restraints and constraints
C10 \\sim C11 \\sim C12 \\sim C13 \\sim C14 \\sim C15 \\sim C16 \\sim C17 \\sim
C18: within 1.7A with sigma of 0.005 and sigma for terminal atoms of 0.002
S1A \\sim N1A \\sim N2A \\sim C1A \\sim C2A \\sim C3A \\sim C4A \\sim C5A \\sim
C6A \\sim S1B \\sim N1B \\sim N2B \\sim C1B \\sim C2B \\sim C3B \\sim C4B \\sim
C5B \\sim C6B \\sim C7 \\sim C8: within 1.7A with sigma of 0.01 and sigma for
terminal atoms of 0.002
6. Others
 1*[Sof(C1C)+Sof(C2C)+Sof(C3C)+Sof(C4C)+Sof(C5C)+Sof(C6C)+Sof(C7C)+Sof(C8C)+
 Sof(C9C)+Sof(C10C)+Sof(C11C)+Sof(C12C)+Sof(C13C)+Sof(C14C)+Sof(C15C)+Sof(C16C)+
 Sof(C17C)+Sof(C18C)+Sof(C19C)+Sof(C20C)+Sof(C21C)+Sof(C22C)+Sof(C23C)+
 Sof(C24C)+Sof(C25C)+Sof(C26C)+Sof(C27C)+Sof(C28C)+Sof(C29C)+Sof(C30C)+
 Sof(C31C)+Sof(C32C)+Sof(C33C)+Sof(C34C)+Sof(C35C)+Sof(C36C)+Sof(C37C)+
 Sof(C38C)+Sof(C39C)+Sof(C40C)+Sof(C41C)+Sof(C42C)+Sof(C43C)+Sof(C44C)+
 Sof(C45C)+Sof(C46C)+Sof(C47C)+Sof(C48C)+Sof(C49C)+Sof(C50C)+Sof(C51C)+
 Sof(C52C)+Sof(C53C)+Sof(C54C)+Sof(C55C)+Sof(C56C)+Sof(C57C)+Sof(C68C)+
 Sof(C59C)+Sof(C60C)]+1*[Sof(C1D)+Sof(C2D)+Sof(C3D)+Sof(C4D)+Sof(C5D)+Sof(C6D)+
 Sof(C7D)+Sof(C8D)+Sof(C9D)+Sof(C10D)+Sof(C11D)+Sof(C12D)+Sof(C13D)+Sof(C14D)+
 Sof(C15D)+Sof(C16D)+Sof(C17D)+Sof(C18D)+Sof(C19D)+Sof(C20D)+Sof(C21D)+
 Sof(C22D)+Sof(C23D)+Sof(C24D)+Sof(C25D)+Sof(C26D)+Sof(C27D)+Sof(C28D)+
 Sof(C29D)+Sof(C30D)+Sof(C31D)+Sof(C32D)+Sof(C33D)+Sof(C34D)+Sof(C35D)+
 Sof(C36D)+Sof(C37D)+Sof(C38D)+Sof(C39D)+Sof(C40D)+Sof(C41D)+Sof(C42D)+
 Sof(C43D)+Sof(C44D)+Sof(C45D)+Sof(C46D)+Sof(C47D)+Sof(C48D)+Sof(C49D)+
 Sof(C50D)+Sof(C51D)+Sof(C52D)+Sof(C53D)+Sof(C54D)+Sof(C55D)+Sof(C56D)+
 Sof(C57D)+Sof(C58D)+Sof(C59D)+Sof(C60D)]+1*[Sof(C1E)+Sof(C2E)+Sof(C3E)+
 Sof(C4E)+Sof(C5E)+Sof(C6E)+Sof(C7E)+Sof(C8E)+Sof(C9E)+Sof(C10E)+Sof(C11E)+
 Sof(C12E)+Sof(C13E)+Sof(C14E)+Sof(C15E)+Sof(C16E)+Sof(C17E)+Sof(C18E)+
 Sof(C19E)+Sof(C20E)+Sof(C21E)+Sof(C22E)+Sof(C23E)+Sof(C24E)+Sof(C25E)+
 Sof(C26E)+Sof(C27E)+Sof(C28E)+Sof(C29E)+Sof(C30E)+Sof(C31E)+Sof(C32E)+
 Sof(C33E)+Sof(C34E)+Sof(C35E)+Sof(C36E)+Sof(C37E)+Sof(C38E)+Sof(C39E)+
 Sof(C40E)+Sof(C41E)+Sof(C42E)+Sof(C43E)+Sof(C44E)+Sof(C45E)+Sof(C46E)+
 Sof(C47E)+Sof(C48E)+Sof(C49E)+Sof(C50E)+Sof(C51E)+Sof(C52E)+Sof(C53E)+
 Sof(C54E)+Sof(C55E)+Sof(C56E)+Sof(C57E)+Sof(C58E)+Sof(C59E)+Sof(C60E)]+1*
 [Sof(C1F)+Sof(C2F)+Sof(C3F)+Sof(C4F)+Sof(C5F)+Sof(C6F)+Sof(C7F)+Sof(C8F)+
 Sof(C9F)+Sof(C10F)+Sof(C11F)+Sof(C12F)+Sof(C13F)+Sof(C14F)+Sof(C15F)+Sof(C16F)+
 Sof(C17F)+Sof(C18F)+Sof(C19F)+Sof(C20F)+Sof(C21F)+Sof(C22F)+Sof(C23F)+
 Sof(C24F)+Sof(C25F)+Sof(C26F)+Sof(C27F)+Sof(C28F)+Sof(C29F)+Sof(C30F)+
 Sof(C31F)+Sof(C32F)+Sof(C33F)+Sof(C34F)+Sof(C35F)+Sof(C36F)+Sof(C37F)+
 Sof(C38F)+Sof(C39F)+Sof(C40F)+Sof(C41F)+Sof(C42F)+Sof(C43F)+Sof(C44F)+
 Sof(C45F)+Sof(C46F)+Sof(C47F)+Sof(C48F)+Sof(C49F)+Sof(C50F)+Sof(C51F)+
 Sof(C52F)+Sof(C53F)+Sof(C54F)+Sof(C55F)+Sof(C56F)+Sof(C57F)+Sof(C58F)+
 Sof(C59F)+Sof(C60F)]+1*[Sof(C1G)+Sof(C2G)+Sof(C3G)+Sof(C4G)+Sof(C5G)+Sof(C6G)+
 Sof(C7G)+Sof(C8G)+Sof(C9G)+Sof(C10G)+Sof(C11G)+Sof(C12G)+Sof(C13G)+Sof(C14G)+
 Sof(C15G)+Sof(C16G)+Sof(C17G)+Sof(C18G)+Sof(C19G)+Sof(C20G)+Sof(C21G)+
 Sof(C22G)+Sof(C23G)+Sof(C24G)+Sof(C25G)+Sof(C26G)+Sof(C27G)+Sof(C28G)+
 Sof(C29G)+Sof(C30G)+Sof(C31G)+Sof(C32G)+Sof(C33G)+Sof(C34G)+Sof(C35G)+
 Sof(C36G)+Sof(C37G)+Sof(C38G)+Sof(C39G)+Sof(C40G)+Sof(C41G)+Sof(C42G)+
 Sof(C43G)+Sof(C44G)+Sof(C45G)+Sof(C46G)+Sof(C47G)+Sof(C48G)+Sof(C49G)+
 Sof(C50G)+Sof(C51G)+Sof(C52G)+Sof(C53G)+Sof(C54G)+Sof(C55G)+Sof(C56G)+
 Sof(C57G)+Sof(C58G)+Sof(C59G)+Sof(C60G)]+1*[Sof(C1H)+Sof(C2H)+Sof(C3H)+
 Sof(C4H)+Sof(C5H)+Sof(C6H)+Sof(C7H)+Sof(C8H)+Sof(C9H)+Sof(C10H)+Sof(C11H)+
 Sof(C13H)+Sof(C12H)+Sof(C14H)+Sof(C15H)+Sof(C16H)+Sof(C17H)+Sof(C18H)+
 Sof(C19H)+Sof(C20H)+Sof(C21H)+Sof(C22H)+Sof(C23H)+Sof(C24H)+Sof(C25H)+
 Sof(C26H)+Sof(C27H)+Sof(C28H)+Sof(C29H)+Sof(C30H)+Sof(C31H)+Sof(C32H)+
 Sof(C33H)+Sof(C34H)+Sof(C35H)+Sof(C36H)+Sof(C37H)+Sof(C38H)+Sof(C39H)+
 Sof(C40H)+Sof(C41H)+Sof(C42H)+Sof(C43H)+Sof(C44H)+Sof(C45H)+Sof(C46H)+
 Sof(C47H)+Sof(C48H)+Sof(C49H)+Sof(C50H)+Sof(C51H)+Sof(C52H)+Sof(C53H)+
 Sof(C54H)+Sof(C55H)+Sof(C56H)+Sof(C57H)+Sof(C58H)+Sof(C59H)+Sof(C60H)]=1 with
 esd of 0.0001
 Sof(C1C)=Sof(C2C)=Sof(C3C)=Sof(C4C)=Sof(C5C)=Sof(C6C)=Sof(C7C)=Sof(C8C)=
 Sof(C9C)=Sof(C10C)=Sof(C11C)=Sof(C12C)=Sof(C13C)=Sof(C14C)=Sof(C15C)=Sof(C16C)=
 Sof(C17C)=Sof(C18C)=Sof(C19C)=Sof(C20C)=Sof(C21C)=Sof(C22C)=Sof(C23C)=
 Sof(C24C)=Sof(C25C)=Sof(C26C)=Sof(C27C)=Sof(C28C)=Sof(C29C)=Sof(C30C)=
 Sof(C31C)=Sof(C32C)=Sof(C33C)=Sof(C34C)=Sof(C35C)=Sof(C36C)=Sof(C37C)=
 Sof(C38C)=Sof(C39C)=Sof(C40C)=Sof(C41C)=Sof(C42C)=Sof(C43C)=Sof(C44C)=
 Sof(C45C)=Sof(C46C)=Sof(C47C)=Sof(C48C)=Sof(C49C)=Sof(C50C)=Sof(C51C)=
 Sof(C52C)=Sof(C53C)=Sof(C54C)=Sof(C55C)=Sof(C56C)=Sof(C57C)=Sof(C68C)=
 Sof(C59C)=Sof(C60C)=0.16667*FVAR(2)
 Sof(C1D)=Sof(C2D)=Sof(C3D)=Sof(C4D)=Sof(C5D)=Sof(C6D)=Sof(C7D)=Sof(C8D)=
 Sof(C9D)=Sof(C10D)=Sof(C11D)=Sof(C12D)=Sof(C13D)=Sof(C14D)=Sof(C15D)=Sof(C16D)=
 Sof(C17D)=Sof(C18D)=Sof(C19D)=Sof(C20D)=Sof(C21D)=Sof(C22D)=Sof(C23D)=
 Sof(C24D)=Sof(C25D)=Sof(C26D)=Sof(C27D)=Sof(C28D)=Sof(C29D)=Sof(C30D)=
 Sof(C31D)=Sof(C32D)=Sof(C33D)=Sof(C34D)=Sof(C35D)=Sof(C36D)=Sof(C37D)=
 Sof(C38D)=Sof(C39D)=Sof(C40D)=Sof(C41D)=Sof(C42D)=Sof(C43D)=Sof(C44D)=
 Sof(C45D)=Sof(C46D)=Sof(C47D)=Sof(C48D)=Sof(C49D)=Sof(C50D)=Sof(C51D)=
 Sof(C52D)=Sof(C53D)=Sof(C54D)=Sof(C55D)=Sof(C56D)=Sof(C57D)=Sof(C58D)=
 Sof(C59D)=Sof(C60D)=0.16667*FVAR(3)
 Sof(C1E)=Sof(C2E)=Sof(C3E)=Sof(C4E)=Sof(C5E)=Sof(C6E)=Sof(C7E)=Sof(C8E)=
 Sof(C9E)=Sof(C10E)=Sof(C11E)=Sof(C12E)=Sof(C13E)=Sof(C14E)=Sof(C15E)=Sof(C16E)=
 Sof(C17E)=Sof(C18E)=Sof(C19E)=Sof(C20E)=Sof(C21E)=Sof(C22E)=Sof(C23E)=
 Sof(C24E)=Sof(C25E)=Sof(C26E)=Sof(C27E)=Sof(C28E)=Sof(C29E)=Sof(C30E)=
 Sof(C31E)=Sof(C32E)=Sof(C33E)=Sof(C34E)=Sof(C35E)=Sof(C36E)=Sof(C37E)=
 Sof(C38E)=Sof(C39E)=Sof(C40E)=Sof(C41E)=Sof(C42E)=Sof(C43E)=Sof(C44E)=
 Sof(C45E)=Sof(C46E)=Sof(C47E)=Sof(C48E)=Sof(C49E)=Sof(C50E)=Sof(C51E)=
 Sof(C52E)=Sof(C53E)=Sof(C54E)=Sof(C55E)=Sof(C56E)=Sof(C57E)=Sof(C58E)=
 Sof(C59E)=Sof(C60E)=0.16667*FVAR(4)
 Sof(C1F)=Sof(C2F)=Sof(C3F)=Sof(C4F)=Sof(C5F)=Sof(C6F)=Sof(C7F)=Sof(C8F)=
 Sof(C9F)=Sof(C10F)=Sof(C11F)=Sof(C12F)=Sof(C13F)=Sof(C14F)=Sof(C15F)=Sof(C16F)=
 Sof(C17F)=Sof(C18F)=Sof(C19F)=Sof(C20F)=Sof(C21F)=Sof(C22F)=Sof(C23F)=
 Sof(C24F)=Sof(C25F)=Sof(C26F)=Sof(C27F)=Sof(C28F)=Sof(C29F)=Sof(C30F)=
 Sof(C31F)=Sof(C32F)=Sof(C33F)=Sof(C34F)=Sof(C35F)=Sof(C36F)=Sof(C37F)=
 Sof(C38F)=Sof(C39F)=Sof(C40F)=Sof(C41F)=Sof(C42F)=Sof(C43F)=Sof(C44F)=
 Sof(C45F)=Sof(C46F)=Sof(C47F)=Sof(C48F)=Sof(C49F)=Sof(C50F)=Sof(C51F)=
 Sof(C52F)=Sof(C53F)=Sof(C54F)=Sof(C55F)=Sof(C56F)=Sof(C57F)=Sof(C58F)=
 Sof(C59F)=Sof(C60F)=0.16667*FVAR(5)
 Sof(C1G)=Sof(C2G)=Sof(C3G)=Sof(C4G)=Sof(C5G)=Sof(C6G)=Sof(C7G)=Sof(C8G)=
 Sof(C9G)=Sof(C10G)=Sof(C11G)=Sof(C12G)=Sof(C13G)=Sof(C14G)=Sof(C15G)=Sof(C16G)=
 Sof(C17G)=Sof(C18G)=Sof(C19G)=Sof(C20G)=Sof(C21G)=Sof(C22G)=Sof(C23G)=
 Sof(C24G)=Sof(C25G)=Sof(C26G)=Sof(C27G)=Sof(C28G)=Sof(C29G)=Sof(C30G)=
 Sof(C31G)=Sof(C32G)=Sof(C33G)=Sof(C34G)=Sof(C35G)=Sof(C36G)=Sof(C37G)=
 Sof(C38G)=Sof(C39G)=Sof(C40G)=Sof(C41G)=Sof(C42G)=Sof(C43G)=Sof(C44G)=
 Sof(C45G)=Sof(C46G)=Sof(C47G)=Sof(C48G)=Sof(C49G)=Sof(C50G)=Sof(C51G)=
 Sof(C52G)=Sof(C53G)=Sof(C54G)=Sof(C55G)=Sof(C56G)=Sof(C57G)=Sof(C58G)=
 Sof(C59G)=Sof(C60G)=0.16667*FVAR(6)
 Sof(C1H)=Sof(C2H)=Sof(C3H)=Sof(C4H)=Sof(C5H)=Sof(C6H)=Sof(C7H)=Sof(C8H)=
 Sof(C9H)=Sof(C10H)=Sof(C11H)=Sof(C13H)=Sof(C12H)=Sof(C14H)=Sof(C15H)=Sof(C16H)=
 Sof(C17H)=Sof(C18H)=Sof(C19H)=Sof(C20H)=Sof(C21H)=Sof(C22H)=Sof(C23H)=
 Sof(C24H)=Sof(C25H)=Sof(C26H)=Sof(C27H)=Sof(C28H)=Sof(C29H)=Sof(C30H)=
 Sof(C31H)=Sof(C32H)=Sof(C33H)=Sof(C34H)=Sof(C35H)=Sof(C36H)=Sof(C37H)=
 Sof(C38H)=Sof(C39H)=Sof(C40H)=Sof(C41H)=Sof(C42H)=Sof(C43H)=Sof(C44H)=
 Sof(C45H)=Sof(C46H)=Sof(C47H)=Sof(C48H)=Sof(C49H)=Sof(C50H)=Sof(C51H)=
 Sof(C52H)=Sof(C53H)=Sof(C54H)=Sof(C55H)=Sof(C56H)=Sof(C57H)=Sof(C58H)=
 Sof(C59H)=Sof(C60H)=0.16666*FVAR(7)
 Uiso(C1C)=Uiso(C2C)=Uiso(C3C)=Uiso(C4C)=Uiso(C5C)=Uiso(C6C)=Uiso(C7C)=
 Uiso(C8C)=Uiso(C9C)=Uiso(C10C)=Uiso(C11C)=Uiso(C12C)=Uiso(C13C)=Uiso(C14C)=
 Uiso(C15C)=Uiso(C16C)=Uiso(C17C)=Uiso(C18C)=Uiso(C19C)=Uiso(C20C)=Uiso(C21C)=
 Uiso(C22C)=Uiso(C23C)=Uiso(C24C)=Uiso(C25C)=Uiso(C26C)=Uiso(C27C)=Uiso(C28C)=
 Uiso(C29C)=Uiso(C30C)=Uiso(C31C)=Uiso(C32C)=Uiso(C33C)=Uiso(C34C)=Uiso(C35C)=
 Uiso(C36C)=Uiso(C37C)=Uiso(C38C)=Uiso(C39C)=Uiso(C40C)=Uiso(C41C)=Uiso(C42C)=
 Uiso(C43C)=Uiso(C44C)=Uiso(C45C)=Uiso(C46C)=Uiso(C47C)=Uiso(C48C)=Uiso(C49C)=
 Uiso(C50C)=Uiso(C51C)=Uiso(C52C)=Uiso(C53C)=Uiso(C54C)=Uiso(C55C)=Uiso(C56C)=
 Uiso(C57C)=Uiso(C68C)=Uiso(C59C)=Uiso(C60C)=Uiso(C1D)=Uiso(C2D)=Uiso(C3D)=
 Uiso(C4D)=Uiso(C5D)=Uiso(C6D)=Uiso(C7D)=Uiso(C8D)=Uiso(C9D)=Uiso(C10D)=
 Uiso(C11D)=Uiso(C12D)=Uiso(C13D)=Uiso(C14D)=Uiso(C15D)=Uiso(C16D)=Uiso(C17D)=
 Uiso(C18D)=Uiso(C19D)=Uiso(C20D)=Uiso(C21D)=Uiso(C22D)=Uiso(C23D)=Uiso(C24D)=
 Uiso(C25D)=Uiso(C26D)=Uiso(C27D)=Uiso(C28D)=Uiso(C29D)=Uiso(C30D)=Uiso(C31D)=
 Uiso(C32D)=Uiso(C33D)=Uiso(C34D)=Uiso(C35D)=Uiso(C36D)=Uiso(C37D)=Uiso(C38D)=
 Uiso(C39D)=Uiso(C40D)=Uiso(C41D)=Uiso(C42D)=Uiso(C43D)=Uiso(C44D)=Uiso(C45D)=
 Uiso(C46D)=Uiso(C47D)=Uiso(C48D)=Uiso(C49D)=Uiso(C50D)=Uiso(C51D)=Uiso(C52D)=
 Uiso(C53D)=Uiso(C54D)=Uiso(C55D)=Uiso(C56D)=Uiso(C57D)=Uiso(C58D)=Uiso(C59D)=
 Uiso(C60D)=Uiso(C1E)=Uiso(C2E)=Uiso(C3E)=Uiso(C4E)=Uiso(C5E)=Uiso(C6E)=
 Uiso(C7E)=Uiso(C8E)=Uiso(C9E)=Uiso(C10E)=Uiso(C11E)=Uiso(C12E)=Uiso(C13E)=
 Uiso(C14E)=Uiso(C15E)=Uiso(C16E)=Uiso(C17E)=Uiso(C18E)=Uiso(C19E)=Uiso(C20E)=
 Uiso(C21E)=Uiso(C22E)=Uiso(C23E)=Uiso(C24E)=Uiso(C25E)=Uiso(C26E)=Uiso(C27E)=
 Uiso(C28E)=Uiso(C29E)=Uiso(C30E)=Uiso(C31E)=Uiso(C32E)=Uiso(C33E)=Uiso(C34E)=
 Uiso(C35E)=Uiso(C36E)=Uiso(C37E)=Uiso(C38E)=Uiso(C39E)=Uiso(C40E)=Uiso(C41E)=
 Uiso(C42E)=Uiso(C43E)=Uiso(C44E)=Uiso(C45E)=Uiso(C46E)=Uiso(C47E)=Uiso(C48E)=
 Uiso(C49E)=Uiso(C50E)=Uiso(C51E)=Uiso(C52E)=Uiso(C53E)=Uiso(C54E)=Uiso(C55E)=
 Uiso(C56E)=Uiso(C57E)=Uiso(C58E)=Uiso(C59E)=Uiso(C60E)=Uiso(C1F)=Uiso(C2F)=
 Uiso(C3F)=Uiso(C4F)=Uiso(C5F)=Uiso(C6F)=Uiso(C7F)=Uiso(C8F)=Uiso(C9F)=
 Uiso(C10F)=Uiso(C11F)=Uiso(C12F)=Uiso(C13F)=Uiso(C14F)=Uiso(C15F)=Uiso(C16F)=
 Uiso(C17F)=Uiso(C18F)=Uiso(C19F)=Uiso(C20F)=Uiso(C21F)=Uiso(C22F)=Uiso(C23F)=
 Uiso(C24F)=Uiso(C25F)=Uiso(C26F)=Uiso(C27F)=Uiso(C28F)=Uiso(C29F)=Uiso(C30F)=
 Uiso(C31F)=Uiso(C32F)=Uiso(C33F)=Uiso(C34F)=Uiso(C35F)=Uiso(C36F)=Uiso(C37F)=
 Uiso(C38F)=Uiso(C39F)=Uiso(C40F)=Uiso(C41F)=Uiso(C42F)=Uiso(C43F)=Uiso(C44F)=
 Uiso(C45F)=Uiso(C46F)=Uiso(C47F)=Uiso(C48F)=Uiso(C49F)=Uiso(C50F)=Uiso(C51F)=
 Uiso(C52F)=Uiso(C53F)=Uiso(C54F)=Uiso(C55F)=Uiso(C56F)=Uiso(C57F)=Uiso(C58F)=
 Uiso(C59F)=Uiso(C60F)=Uiso(C1G)=Uiso(C2G)=Uiso(C3G)=Uiso(C4G)=Uiso(C5G)=
 Uiso(C6G)=Uiso(C7G)=Uiso(C8G)=Uiso(C9G)=Uiso(C10G)=Uiso(C11G)=Uiso(C12G)=
 Uiso(C13G)=Uiso(C14G)=Uiso(C15G)=Uiso(C16G)=Uiso(C17G)=Uiso(C18G)=Uiso(C19G)=
 Uiso(C20G)=Uiso(C21G)=Uiso(C22G)=Uiso(C23G)=Uiso(C24G)=Uiso(C25G)=Uiso(C26G)=
 Uiso(C27G)=Uiso(C28G)=Uiso(C29G)=Uiso(C30G)=Uiso(C31G)=Uiso(C32G)=Uiso(C33G)=
 Uiso(C34G)=Uiso(C35G)=Uiso(C36G)=Uiso(C37G)=Uiso(C38G)=Uiso(C39G)=Uiso(C40G)=
 Uiso(C41G)=Uiso(C42G)=Uiso(C43G)=Uiso(C44G)=Uiso(C45G)=Uiso(C46G)=Uiso(C47G)=
 Uiso(C48G)=Uiso(C49G)=Uiso(C50G)=Uiso(C51G)=Uiso(C52G)=Uiso(C53G)=Uiso(C54G)=
 Uiso(C55G)=Uiso(C56G)=Uiso(C57G)=Uiso(C58G)=Uiso(C59G)=Uiso(C60G)=Uiso(C1H)=
 Uiso(C2H)=Uiso(C3H)=Uiso(C4H)=Uiso(C5H)=Uiso(C6H)=Uiso(C7H)=Uiso(C8H)=
 Uiso(C9H)=Uiso(C10H)=Uiso(C11H)=Uiso(C13H)=Uiso(C12H)=Uiso(C14H)=Uiso(C15H)=
 Uiso(C16H)=Uiso(C17H)=Uiso(C18H)=Uiso(C19H)=Uiso(C20H)=Uiso(C21H)=Uiso(C22H)=
 Uiso(C23H)=Uiso(C24H)=Uiso(C25H)=Uiso(C26H)=Uiso(C27H)=Uiso(C28H)=Uiso(C29H)=
 Uiso(C30H)=Uiso(C31H)=Uiso(C32H)=Uiso(C33H)=Uiso(C34H)=Uiso(C35H)=Uiso(C36H)=
 Uiso(C37H)=Uiso(C38H)=Uiso(C39H)=Uiso(C40H)=Uiso(C41H)=Uiso(C42H)=Uiso(C43H)=
 Uiso(C44H)=Uiso(C45H)=Uiso(C46H)=Uiso(C47H)=Uiso(C48H)=Uiso(C49H)=Uiso(C50H)=
 Uiso(C51H)=Uiso(C52H)=Uiso(C53H)=Uiso(C54H)=Uiso(C55H)=Uiso(C56H)=Uiso(C57H)=
 Uiso(C58H)=Uiso(C59H)=Uiso(C60H)=FVAR(7)
 Fixed Sof: S1A(0.5) N1A(0.5) N2A(0.5) C1A(0.5) C2A(0.5) H2A(0.5) C3A(0.5)
 C4A(0.5) C5A(0.5) H5A(0.5) C6A(0.5) S1B(0.5) N1B(0.5) N2B(0.5) C1B(0.5)
 C2B(0.5) C3B(0.5) H3B(0.5) C4B(0.5) C5B(0.5) C6B(0.5) H6B(0.5) H7A(0.16665)
 H7B(0.16665) H8B(0.16665) H8A(0.16665) C10(0.16667) C11(0.16667) H11(0.16667)
 C12(0.16667) C13(0.16667) H13(0.16667) C14(0.16667) C15(0.16667) H15(0.16667)
 C16(0.16667) H16A(0.16667) H16B(0.16667) H16C(0.16667) C17(0.16667)
 H17A(0.16667) H17B(0.16667) H17C(0.16667) C18(0.16667) H18A(0.16667)
 H18B(0.16667) H18C(0.16667)
7.a Free rotating group:
 C1C(C2C,C3C,C4C,C5C,C6C,C7C,C8C,C9C,C10C,C11C,C12C,C13C,C14C,C15C,C16C,C17C,
 C18C,C19C,C20C,C21C,C22C,C23C,C24C,C25C,C26C,C27C,C28C,C29C,C30C,C31C,C32C,
 C33C,C34C,C35C,C36C,C37C,C38C,C39C,C40C,C41C,C42C,C43C,C44C,C45C,C46C,C47C,
 C48C,C49C,C50C,C51C,C52C,C53C,C54C,C55C,C56C,C57C,C68C,C59C,C60C), C1D(C2D,C3D,
 C4D,C5D,C6D,C7D,C8D,C9D,C10D,C11D,C12D,C13D,C14D,C15D,C16D,C17D,C18D,C19D,C20D,
 C21D,C22D,C23D,C24D,C25D,C26D,C27D,C28D,C29D,C30D,C31D,C32D,C33D,C34D,C35D,
 C36D,C37D,C38D,C39D,C40D,C41D,C42D,C43D,C44D,C45D,C46D,C47D,C48D,C49D,C50D,
 C51D,C52D,C53D,C54D,C55D,C56D,C57D,C58D,C59D,C60D), C1E(C2E,C3E,C4E,C5E,C6E,
 C7E,C8E,C9E,C10E,C11E,C12E,C13E,C14E,C15E,C16E,C17E,C18E,C19E,C20E,C21E,C22E,
 C23E,C24E,C25E,C26E,C27E,C28E,C29E,C30E,C31E,C32E,C33E,C34E,C35E,C36E,C37E,
 C38E,C39E,C40E,C41E,C42E,C43E,C44E,C45E,C46E,C47E,C48E,C49E,C50E,C51E,C52E,
 C53E,C54E,C55E,C56E,C57E,C58E,C59E,C60E), C1F(C2F,C3F,C4F,C5F,C6F,C7F,C8F,C9F,
 C10F,C11F,C12F,C13F,C14F,C15F,C16F,C17F,C18F,C19F,C20F,C21F,C22F,C23F,C24F,
 C25F,C26F,C27F,C28F,C29F,C30F,C31F,C32F,C33F,C34F,C35F,C36F,C37F,C38F,C39F,
 C40F,C41F,C42F,C43F,C44F,C45F,C46F,C47F,C48F,C49F,C50F,C51F,C52F,C53F,C54F,
 C55F,C56F,C57F,C58F,C59F,C60F), C1G(C2G,C3G,C4G,C5G,C6G,C7G,C8G,C9G,C10G,C11G,
 C12G,C13G,C14G,C15G,C16G,C17G,C18G,C19G,C20G,C21G,C22G,C23G,C24G,C25G,C26G,
 C27G,C28G,C29G,C30G,C31G,C32G,C33G,C34G,C35G,C36G,C37G,C38G,C39G,C40G,C41G,
 C42G,C43G,C44G,C45G,C46G,C47G,C48G,C49G,C50G,C51G,C52G,C53G,C54G,C55G,C56G,
 C57G,C58G,C59G,C60G), C1H(C2H,C3H,C4H,C5H,C6H,C7H,C8H,C9H,C10H,C11H,C13H,C12H,
 C14H,C15H,C16H,C17H,C18H,C19H,C20H,C21H,C22H,C23H,C24H,C25H,C26H,C27H,C28H,
 C29H,C30H,C31H,C32H,C33H,C34H,C35H,C36H,C37H,C38H,C39H,C40H,C41H,C42H,C43H,
 C44H,C45H,C46H,C47H,C48H,C49H,C50H,C51H,C52H,C53H,C54H,C55H,C56H,C57H,C58H,
 C59H,C60H)
7.b Ternary CH refined with riding coordinates:
 C7(H7A), C7(H7B), C8(H8B), C8(H8A)
7.c Aromatic/amide H refined with riding coordinates:
 C2A(H2A), C5A(H5A), C3B(H3B), C6B(H6B), C11(H11), C13(H13), C15(H15)
7.d Fitted hexagon refined as free rotating group:
 C1A(C2A,C3A,C4A,C5A,C6A), C1B(C2B,C3B,C4B,C5B,C6B), C10(C11,C12,C13,C14,C15)
7.e Idealised Me refined as rotating group:
 C16(H16A,H16B,H16C), C17(H17A,H17B,H17C), C18(H18A,H18B,H18C)
;
_atom_sites_solution_hydrogens    geom
_atom_sites_solution_primary      dual
_atom_sites_solution_secondary    ?
loop_
  _atom_site_label
  _atom_site_type_symbol
  _atom_site_fract_x
  _atom_site_fract_y
  _atom_site_fract_z
  _atom_site_U_iso_or_equiv
  _atom_site_adp_type
  _atom_site_occupancy
  _atom_site_site_symmetry_order
  _atom_site_calc_flag
  _atom_site_refinement_flags_posn
  _atom_site_refinement_flags_adp
  _atom_site_refinement_flags_occupancy
  _atom_site_disorder_assembly
  _atom_site_disorder_group
 S1A S 0.4041(2) 0.30230(18) 0.2009(2) 0.0598(9) Uani 0.5 1 d D U . A 1
 N1A N 0.4877(5) 0.3120(6) 0.1851(6) 0.052(3) Uani 0.5 1 d D U . A 1
 N2A N 0.4053(6) 0.2420(5) 0.2615(5) 0.052(2) Uani 0.5 1 d D U . A 1
 C1A C 0.6190(4) 0.2117(7) 0.2863(7) 0.0274(19) Uani 0.5 1 d . U . A 1
 C2A C 0.5927(3) 0.2588(6) 0.2363(6) 0.0317(18) Uani 0.5 1 d G U . A 1
 H2A H 0.624398 0.285054 0.207418 0.038 Uiso 0.5 1 calc R . . A 1
 C3A C 0.5201(4) 0.2676(5) 0.2286(5) 0.039(2) Uani 0.5 1 d DG U . A 1
 C4A C 0.4738(3) 0.2292(5) 0.2708(6) 0.048(3) Uani 0.5 1 d DG U . A 1
 C5A C 0.5000(5) 0.1820(6) 0.3208(6) 0.064(3) Uani 0.5 1 d G U . A 1
 H5A H 0.468338 0.155802 0.349657 0.077 Uiso 0.5 1 calc R . . A 1
 C6A C 0.5726(5) 0.1733(7) 0.3285(7) 0.044(3) Uani 0.5 1 d G U . A 1
 S1B S 0.3908(2) 0.2709(4) 0.2271(4) 0.110(2) Uani 0.5 1 d D U . A 2
 N1B N 0.4013(7) 0.2097(7) 0.2861(7) 0.092(4) Uani 0.5 1 d D U . A 2
 N2B N 0.4714(4) 0.2913(7) 0.2064(7) 0.073(4) Uani 0.5 1 d D U . A 2
 C1B C 0.4717(3) 0.2064(5) 0.2912(6) 0.053(3) Uani 0.5 1 d D U . A 2
 C2B C 0.5118(4) 0.2495(6) 0.2471(6) 0.051(3) Uani 0.5 1 d DG U . A 2
 C3B C 0.5852(4) 0.2465(7) 0.2496(7) 0.055(3) Uani 0.5 1 d G U . A 2
 H3B H 0.612641 0.275873 0.219479 0.066 Uiso 0.5 1 calc R . . A 2
 C4B C 0.6186(3) 0.2004(8) 0.2963(8) 0.051(4) Uani 0.5 1 d G U . A 2
 C5B C 0.5784(5) 0.1574(7) 0.3404(8) 0.051(3) Uani 0.5 1 d G U . A 2
 C6B C 0.5050(5) 0.1604(5) 0.3378(6) 0.056(3) Uani 0.5 1 d G U . A 2
 H6B H 0.477609 0.130939 0.367983 0.067 Uiso 0.5 1 calc R . . A 2
 C7 C 0.69640(19) 0.19640(19) 0.30360(19) 0.0401(13) Uani 1 3 d S TU P . .
 H7A H 0.726942 0.226942 0.273058 0.048 Uiso 0.4999 3 calc RS T P A 1
 H7B H 0.726942 0.226942 0.273058 0.048 Uiso 0.4999 3 calc RS T P A 2
 C8 C 0.6173(2) 0.1173(2) 0.3827(2) 0.074(2) Uani 1 3 d S TU P . .
 H8B H 0.586742 0.086741 0.413259 0.089 Uiso 0.4999 3 calc RS T P A 2
 H8A H 0.586742 0.086740 0.413260 0.089 Uiso 0.4999 3 calc RS T P A 1
 C1C C 0.3570(19) 0.577(2) 0.3939(19) 0.0209(12) Uiso 0.0244(16) 1 d . . . B
 -1
 C2C C 0.377(2) 0.516(2) 0.3507(18) 0.0209(12) Uiso 0.0244(16) 1 d G . . B -1
 C3C C 0.365(2) 0.447(2) 0.3759(19) 0.0209(12) Uiso 0.0244(16) 1 d G . . B -1
 C4C C 0.3316(19) 0.437(2) 0.442(2) 0.0209(12) Uiso 0.0244(16) 1 d G . . B -1
 C5C C 0.3109(17) 0.495(2) 0.484(2) 0.0209(12) Uiso 0.0244(16) 1 d G . . B -1
 C6C C 0.3248(17) 0.567(2) 0.459(2) 0.0209(12) Uiso 0.0244(16) 1 d G . . B -1
 C7C C 0.3452(18) 0.6099(18) 0.519(2) 0.0209(12) Uiso 0.0244(16) 1 d G . . B
 -1
 C8C C 0.397(2) 0.6610(17) 0.5119(19) 0.0209(12) Uiso 0.0244(16) 1 d G . . B
 -1
 C9C C 0.431(2) 0.6720(17) 0.4436(18) 0.0209(12) Uiso 0.0244(16) 1 d G . . B
 -1
 C10C C 0.412(2) 0.6312(19) 0.3862(18) 0.0209(12) Uiso 0.0244(16) 1 d G . . B
 -1
 C11C C 0.466(2) 0.6039(19) 0.3382(16) 0.0209(12) Uiso 0.0244(16) 1 d G . . B
 -1
 C12C C 0.536(2) 0.6189(19) 0.3504(16) 0.0209(12) Uiso 0.0244(16) 1 d G . . B
 -1
 C13C C 0.557(2) 0.6620(18) 0.4110(17) 0.0209(12) Uiso 0.0244(16) 1 d G . . B
 -1
 C14C C 0.505(2) 0.6878(17) 0.4564(18) 0.0209(12) Uiso 0.0244(16) 1 d G . . B
 -1
 C15C C 0.517(2) 0.6866(16) 0.5326(18) 0.0209(12) Uiso 0.0244(16) 1 d G . . B
 -1
 C16C C 0.580(2) 0.6597(18) 0.5593(17) 0.0209(12) Uiso 0.0244(16) 1 d G . . B
 -1
 C17C C 0.6337(19) 0.6323(19) 0.5115(18) 0.0209(12) Uiso 0.0244(16) 1 d G . .
 B -1
 C18C C 0.6225(19) 0.6335(19) 0.4394(18) 0.0209(12) Uiso 0.0244(16) 1 d G . .
 B -1
 C19C C 0.6427(19) 0.573(2) 0.3961(18) 0.0209(12) Uiso 0.0244(16) 1 d G . . B
 -1
 C20C C 0.6733(18) 0.514(2) 0.4274(19) 0.0209(12) Uiso 0.0244(16) 1 d G . . B
 -1
 C21C C 0.6851(17) 0.513(2) 0.5036(19) 0.0209(12) Uiso 0.0244(16) 1 d G . . B
 -1
 C22C C 0.6659(18) 0.570(2) 0.5445(18) 0.0209(12) Uiso 0.0244(16) 1 d G . . B
 -1
 C23C C 0.6318(19) 0.559(2) 0.6129(17) 0.0209(12) Uiso 0.0244(16) 1 d G . . B
 -1
 C24C C 0.6188(19) 0.492(2) 0.6367(17) 0.0209(12) Uiso 0.0244(16) 1 d G . . B
 -1
 C25C C 0.6391(18) 0.431(2) 0.5935(18) 0.0209(12) Uiso 0.0244(16) 1 d G . . B
 -1
 C26C C 0.6713(17) 0.441(2) 0.5287(19) 0.0209(12) Uiso 0.0244(16) 1 d G . . B
 -1
 C27C C 0.6508(19) 0.398(2) 0.4681(19) 0.0209(12) Uiso 0.0244(16) 1 d G . . B
 -1
 C28C C 0.599(2) 0.3472(18) 0.4754(19) 0.0209(12) Uiso 0.0244(16) 1 d G . . B
 -1
 C29C C 0.565(2) 0.3362(17) 0.5438(19) 0.0209(12) Uiso 0.0244(16) 1 d G . . B
 -1
 C30C C 0.5845(19) 0.3770(18) 0.6012(18) 0.0209(12) Uiso 0.0244(16) 1 d G . .
 B -1
 C31C C 0.530(2) 0.4043(18) 0.6492(17) 0.0209(12) Uiso 0.0244(16) 1 d G . . B
 -1
 C32C C 0.460(2) 0.3893(17) 0.6371(17) 0.0209(12) Uiso 0.0244(16) 1 d G . . B
 -1
 C33C C 0.440(2) 0.3463(17) 0.5764(19) 0.0209(12) Uiso 0.0244(16) 1 d G . . B
 -1
 C34C C 0.491(2) 0.3205(16) 0.5310(19) 0.0209(12) Uiso 0.0244(16) 1 d G . . B
 -1
 C35C C 0.479(2) 0.3217(16) 0.4548(19) 0.0209(12) Uiso 0.0244(16) 1 d G . . B
 -1
 C36C C 0.415(2) 0.3502(18) 0.428(2) 0.0209(12) Uiso 0.0244(16) 1 d G . . B -1
 C37C C 0.363(2) 0.3767(18) 0.474(2) 0.0209(12) Uiso 0.0244(16) 1 d G . . B -1
 C38C C 0.3736(19) 0.3748(18) 0.548(2) 0.0209(12) Uiso 0.0244(16) 1 d G . . B
 -1
 C39C C 0.3533(18) 0.4355(18) 0.591(2) 0.0209(12) Uiso 0.0244(16) 1 d G . . B
 -1
 C40C C 0.3229(17) 0.4940(19) 0.560(2) 0.0209(12) Uiso 0.0244(16) 1 d G . . B
 -1
 C41C C 0.3441(18) 0.5649(19) 0.582(2) 0.0209(12) Uiso 0.0244(16) 1 d G . . B
 -1
 C42C C 0.395(2) 0.5734(18) 0.6340(17) 0.0209(12) Uiso 0.0244(16) 1 d G . . B
 -1
 C43C C 0.449(2) 0.6274(17) 0.6264(17) 0.0209(12) Uiso 0.0244(16) 1 d G . . B
 -1
 C44C C 0.515(2) 0.5990(18) 0.6546(15) 0.0209(12) Uiso 0.0244(16) 1 d G . . B
 -1
 C45C C 0.501(2) 0.5274(19) 0.6798(15) 0.0209(12) Uiso 0.0244(16) 1 d G . . B
 -1
 C46C C 0.427(2) 0.5115(18) 0.6671(16) 0.0209(12) Uiso 0.0244(16) 1 d G . . B
 -1
 C47C C 0.579(2) 0.6145(19) 0.6221(16) 0.0209(12) Uiso 0.0244(16) 1 d G . . B
 -1
 C48C C 0.450(2) 0.6700(16) 0.5670(18) 0.0209(12) Uiso 0.0244(16) 1 d G . . B
 -1
 C49C C 0.552(2) 0.4752(19) 0.6710(15) 0.0209(12) Uiso 0.0244(16) 1 d G . . B
 -1
 C50C C 0.546(2) 0.3382(18) 0.4203(19) 0.0209(12) Uiso 0.0244(16) 1 d G . . B
 -1
 C51C C 0.547(2) 0.3809(19) 0.3611(17) 0.0209(12) Uiso 0.0244(16) 1 d G . . B
 -1
 C52C C 0.601(2) 0.435(2) 0.3535(17) 0.0209(12) Uiso 0.0244(16) 1 d G . . B -1
 C53C C 0.652(2) 0.443(2) 0.4055(18) 0.0209(12) Uiso 0.0244(16) 1 d G . . B -1
 C54C C 0.416(2) 0.3939(19) 0.3670(18) 0.0209(12) Uiso 0.0244(16) 1 d G . . B
 -1
 C55C C 0.481(2) 0.409(2) 0.3327(17) 0.0209(12) Uiso 0.0244(16) 1 d G . . B -1
 C56C C 0.495(2) 0.481(2) 0.3077(15) 0.0209(12) Uiso 0.0244(16) 1 d G . . B -1
 C57C C 0.444(2) 0.533(2) 0.3163(16) 0.0209(12) Uiso 0.0244(16) 1 d G . . B -1
 C68C C 0.569(2) 0.497(2) 0.3204(15) 0.0209(12) Uiso 0.0244(16) 1 d G . . B -1
 C59C C 0.589(2) 0.564(2) 0.3412(16) 0.0209(12) Uiso 0.0244(16) 1 d G . . B -1
 C60C C 0.4068(19) 0.4445(18) 0.6463(18) 0.0209(12) Uiso 0.0244(16) 1 d G . .
 B -1
 C1D C 0.3439(18) 0.475(2) 0.396(2) 0.0209(12) Uiso 0.0190(13) 1 d . . . C -2
 C2D C 0.396(2) 0.446(2) 0.3468(18) 0.0209(12) Uiso 0.0190(13) 1 d G . . C -2
 C3D C 0.430(2) 0.3817(19) 0.3624(19) 0.0209(12) Uiso 0.0190(13) 1 d G . . C
 -2
 C4D C 0.413(2) 0.3439(18) 0.425(2) 0.0209(12) Uiso 0.0190(13) 1 d G . . C -2
 C5D C 0.3616(19) 0.3706(18) 0.472(2) 0.0209(12) Uiso 0.0190(13) 1 d G . . C
 -2
 C6D C 0.3270(17) 0.438(2) 0.457(2) 0.0209(12) Uiso 0.0190(13) 1 d G . . C -2
 C7D C 0.3178(17) 0.476(2) 0.523(2) 0.0209(12) Uiso 0.0190(13) 1 d G . . C -2
 C8D C 0.3261(18) 0.5481(19) 0.526(2) 0.0209(12) Uiso 0.0190(13) 1 d G . . C
 -2
 C9D C 0.3438(18) 0.5871(19) 0.461(2) 0.0209(12) Uiso 0.0190(13) 1 d G . . C
 -2
 C10D C 0.3525(18) 0.551(2) 0.3983(19) 0.0209(12) Uiso 0.0190(13) 1 d G . . C
 -2
 C11D C 0.410(2) 0.570(2) 0.3508(18) 0.0209(12) Uiso 0.0190(13) 1 d G . . C -2
 C12D C 0.456(2) 0.6241(19) 0.3689(19) 0.0209(12) Uiso 0.0190(13) 1 d G . . C
 -2
 C13D C 0.447(2) 0.6619(17) 0.436(2) 0.0209(12) Uiso 0.0190(13) 1 d G . . C -2
 C14D C 0.3925(19) 0.6438(17) 0.481(2) 0.0209(12) Uiso 0.0190(13) 1 d G . . C
 -2
 C15D C 0.405(2) 0.6401(17) 0.557(2) 0.0209(12) Uiso 0.0190(13) 1 d G . . C -2
 C16D C 0.471(2) 0.6544(17) 0.584(2) 0.0209(12) Uiso 0.0190(13) 1 d G . . C -2
 C17D C 0.529(2) 0.6734(16) 0.536(2) 0.0209(12) Uiso 0.0190(13) 1 d G . . C -2
 C18D C 0.517(2) 0.6770(16) 0.464(2) 0.0209(12) Uiso 0.0190(13) 1 d G . . C -2
 C19D C 0.570(2) 0.6487(18) 0.415(2) 0.0209(12) Uiso 0.0190(13) 1 d G . . C -2
 C20D C 0.6309(19) 0.6182(19) 0.441(2) 0.0209(12) Uiso 0.0190(13) 1 d G . . C
 -2
 C21D C 0.6432(19) 0.6143(19) 0.517(2) 0.0209(12) Uiso 0.0190(13) 1 d G . . C
 -2
 C22D C 0.594(2) 0.6412(18) 0.563(2) 0.0209(12) Uiso 0.0190(13) 1 d G . . C -2
 C23D C 0.576(2) 0.6023(19) 0.628(2) 0.0209(12) Uiso 0.0190(13) 1 d G . . C -2
 C24D C 0.608(2) 0.539(2) 0.642(2) 0.0209(12) Uiso 0.0190(13) 1 d G . . C -2
 C25D C 0.6609(19) 0.510(2) 0.593(2) 0.0209(12) Uiso 0.0190(13) 1 d G . . C -2
 C26D C 0.6778(18) 0.547(2) 0.532(2) 0.0209(12) Uiso 0.0190(13) 1 d G . . C -2
 C27D C 0.6869(17) 0.509(2) 0.466(2) 0.0209(12) Uiso 0.0190(13) 1 d G . . C -2
 C28D C 0.6786(17) 0.437(2) 0.463(2) 0.0209(12) Uiso 0.0190(13) 1 d G . . C -2
 C29D C 0.6609(18) 0.3978(19) 0.528(2) 0.0209(12) Uiso 0.0190(13) 1 d G . . C
 -2
 C30D C 0.6522(19) 0.434(2) 0.591(2) 0.0209(12) Uiso 0.0190(13) 1 d G . . C -2
 C31D C 0.594(2) 0.415(2) 0.638(2) 0.0209(12) Uiso 0.0190(13) 1 d G . . C -2
 C32D C 0.548(2) 0.3609(18) 0.620(2) 0.0209(12) Uiso 0.0190(13) 1 d G . . C -2
 C33D C 0.558(2) 0.3231(17) 0.553(2) 0.0209(12) Uiso 0.0190(13) 1 d G . . C -2
 C34D C 0.612(2) 0.3411(18) 0.508(2) 0.0209(12) Uiso 0.0190(13) 1 d G . . C -2
 C35D C 0.600(2) 0.3450(18) 0.432(2) 0.0209(12) Uiso 0.0190(13) 1 d G . . C -2
 C36D C 0.532(2) 0.3311(18) 0.405(2) 0.0209(12) Uiso 0.0190(13) 1 d G . . C -2
 C37D C 0.476(2) 0.3127(16) 0.451(2) 0.0209(12) Uiso 0.0190(13) 1 d G . . C -2
 C38D C 0.487(2) 0.3080(16) 0.525(2) 0.0209(12) Uiso 0.0190(13) 1 d G . . C -2
 C39D C 0.435(2) 0.3363(17) 0.574(2) 0.0209(12) Uiso 0.0190(13) 1 d G . . C -2
 C40D C 0.3738(19) 0.3668(18) 0.548(2) 0.0209(12) Uiso 0.0190(13) 1 d G . . C
 -2
 C41D C 0.3467(19) 0.4318(19) 0.580(2) 0.0209(12) Uiso 0.0190(13) 1 d G . . C
 -2
 C42D C 0.382(2) 0.4627(19) 0.6355(19) 0.0209(12) Uiso 0.0190(13) 1 d G . . C
 -2
 C43D C 0.391(2) 0.5393(19) 0.6379(18) 0.0209(12) Uiso 0.0190(13) 1 d G . . C
 -2
 C44D C 0.461(2) 0.5545(19) 0.6666(17) 0.0209(12) Uiso 0.0190(13) 1 d G . . C
 -2
 C45D C 0.496(2) 0.487(2) 0.6819(17) 0.0209(12) Uiso 0.0190(13) 1 d G . . C -2
 C46D C 0.447(2) 0.4305(19) 0.6626(18) 0.0209(12) Uiso 0.0190(13) 1 d G . . C
 -2
 C47D C 0.500(2) 0.6105(18) 0.6402(19) 0.0209(12) Uiso 0.0190(13) 1 d G . . C
 -2
 C48D C 0.3637(19) 0.5809(19) 0.585(2) 0.0209(12) Uiso 0.0190(13) 1 d G . . C
 -2
 C49D C 0.567(2) 0.479(2) 0.6700(18) 0.0209(12) Uiso 0.0190(13) 1 d G . . C -2
 C50D C 0.6410(19) 0.404(2) 0.404(2) 0.0209(12) Uiso 0.0190(13) 1 d G . . C -2
 C51D C 0.614(2) 0.446(2) 0.351(2) 0.0209(12) Uiso 0.0190(13) 1 d G . . C -2
 C52D C 0.6224(19) 0.522(2) 0.353(2) 0.0209(12) Uiso 0.0190(13) 1 d G . . C -2
 C53D C 0.6580(18) 0.553(2) 0.409(2) 0.0209(12) Uiso 0.0190(13) 1 d G . . C -2
 C54D C 0.504(2) 0.3738(19) 0.350(2) 0.0209(12) Uiso 0.0190(13) 1 d G . . C -2
 C55D C 0.544(2) 0.430(2) 0.3224(19) 0.0209(12) Uiso 0.0190(13) 1 d G . . C -2
 C56D C 0.509(2) 0.498(2) 0.3071(17) 0.0209(12) Uiso 0.0190(13) 1 d G . . C -2
 C57D C 0.437(2) 0.506(2) 0.3190(17) 0.0209(12) Uiso 0.0190(13) 1 d G . . C -2
 C58D C 0.558(2) 0.554(2) 0.3263(18) 0.0209(12) Uiso 0.0190(13) 1 d G . . C -2
 C59D C 0.532(2) 0.6159(19) 0.3564(19) 0.0209(12) Uiso 0.0190(13) 1 d G . . C
 -2
 C60D C 0.473(2) 0.3691(18) 0.633(2) 0.0209(12) Uiso 0.0190(13) 1 d G . . C -2
 C1E C 0.3308(19) 0.424(2) 0.498(2) 0.0209(12) Uiso 0.0240(13) 1 d . . . D -3
 C2E C 0.363(2) 0.391(2) 0.439(2) 0.0209(12) Uiso 0.0240(13) 1 d G . . D -3
 C3E C 0.416(2) 0.3389(19) 0.450(2) 0.0209(12) Uiso 0.0240(13) 1 d G . . D -3
 C4E C 0.438(2) 0.3212(19) 0.522(2) 0.0209(12) Uiso 0.0240(13) 1 d G . . D -3
 C5E C 0.406(2) 0.3542(19) 0.579(2) 0.0209(12) Uiso 0.0240(13) 1 d G . . D -3
 C6E C 0.3510(19) 0.407(2) 0.567(2) 0.0209(12) Uiso 0.0240(13) 1 d G . . D -3
 C7E C 0.384(2) 0.626(2) 0.442(2) 0.0209(12) Uiso 0.0240(13) 1 d G . . D -3
 C8E C 0.375(2) 0.570(2) 0.3892(19) 0.0209(12) Uiso 0.0240(13) 1 d G . . D -3
 C9E C 0.360(2) 0.616(2) 0.510(2) 0.0209(12) Uiso 0.0240(13) 1 d G . . D -3
 C10E C 0.452(2) 0.6602(19) 0.429(2) 0.0209(12) Uiso 0.0240(13) 1 d G . . D -3
 C11E C 0.343(2) 0.506(2) 0.409(2) 0.0209(12) Uiso 0.0240(13) 1 d G . . D -3
 C12E C 0.438(2) 0.570(2) 0.3443(19) 0.0209(12) Uiso 0.0240(13) 1 d G . . D -3
 C13E C 0.3255(19) 0.550(2) 0.530(2) 0.0209(12) Uiso 0.0240(13) 1 d G . . D -3
 C14E C 0.403(2) 0.6398(19) 0.570(2) 0.0209(12) Uiso 0.0240(13) 1 d G . . D -3
 C15E C 0.492(2) 0.6824(18) 0.486(2) 0.0209(12) Uiso 0.0240(13) 1 d G . . D -3
 C16E C 0.485(2) 0.625(2) 0.3690(19) 0.0209(12) Uiso 0.0240(13) 1 d G . . D -3
 C17E C 0.3181(19) 0.496(2) 0.479(2) 0.0209(12) Uiso 0.0240(13) 1 d G . . D -3
 C18E C 0.370(2) 0.441(2) 0.384(2) 0.0209(12) Uiso 0.0240(13) 1 d G . . D -3
 C19E C 0.465(2) 0.506(2) 0.3205(19) 0.0209(12) Uiso 0.0240(13) 1 d G . . D -3
 C20E C 0.3475(19) 0.532(2) 0.602(2) 0.0209(12) Uiso 0.0240(13) 1 d G . . D -3
 C21E C 0.467(2) 0.6719(19) 0.558(2) 0.0209(12) Uiso 0.0240(13) 1 d G . . D -3
 C22E C 0.3950(19) 0.588(2) 0.6263(19) 0.0209(12) Uiso 0.0240(13) 1 d G . . D
 -3
 C23E C 0.569(2) 0.6709(18) 0.485(2) 0.0209(12) Uiso 0.0240(13) 1 d G . . D -3
 C24E C 0.557(2) 0.6144(19) 0.3687(19) 0.0209(12) Uiso 0.0240(13) 1 d G . . D
 -3
 C25E C 0.431(2) 0.440(2) 0.340(2) 0.0209(12) Uiso 0.0240(13) 1 d G . . D -3
 C26E C 0.541(2) 0.495(2) 0.3200(19) 0.0209(12) Uiso 0.0240(13) 1 d G . . D -3
 C27E C 0.3598(19) 0.463(2) 0.620(2) 0.0209(12) Uiso 0.0240(13) 1 d G . . D -3
 C28E C 0.528(2) 0.654(2) 0.602(2) 0.0209(12) Uiso 0.0240(13) 1 d G . . D -3
 C29E C 0.4525(19) 0.571(2) 0.6681(19) 0.0209(12) Uiso 0.0240(13) 1 d G . . D
 -3
 C30E C 0.600(2) 0.6378(18) 0.428(2) 0.0209(12) Uiso 0.0240(13) 1 d G . . D -3
 C31E C 0.591(2) 0.653(2) 0.557(2) 0.0209(12) Uiso 0.0240(13) 1 d G . . D -3
 C32E C 0.586(2) 0.547(2) 0.3435(19) 0.0209(12) Uiso 0.0240(13) 1 d G . . D -3
 C33E C 0.486(2) 0.387(2) 0.352(2) 0.0209(12) Uiso 0.0240(13) 1 d G . . D -3
 C34E C 0.554(2) 0.421(2) 0.339(2) 0.0209(12) Uiso 0.0240(13) 1 d G . . D -3
 C35E C 0.4205(19) 0.445(2) 0.664(2) 0.0209(12) Uiso 0.0240(13) 1 d G . . D -3
 C36E C 0.5207(19) 0.605(2) 0.6556(19) 0.0209(12) Uiso 0.0240(13) 1 d G . . D
 -3
 C37E C 0.4656(19) 0.497(2) 0.6874(19) 0.0209(12) Uiso 0.0240(13) 1 d G . . D
 -3
 C38E C 0.656(2) 0.5851(19) 0.440(2) 0.0209(12) Uiso 0.0240(13) 1 d G . . D -3
 C39E C 0.6429(19) 0.603(2) 0.568(2) 0.0209(12) Uiso 0.0240(13) 1 d G . . D -3
 C40E C 0.647(2) 0.5292(19) 0.3875(19) 0.0209(12) Uiso 0.0240(13) 1 d G . . D
 -3
 C41E C 0.479(2) 0.3383(19) 0.405(2) 0.0209(12) Uiso 0.0240(13) 1 d G . . D -3
 C42E C 0.612(2) 0.4041(19) 0.381(2) 0.0209(12) Uiso 0.0240(13) 1 d G . . D -3
 C43E C 0.449(2) 0.378(2) 0.639(2) 0.0209(12) Uiso 0.0240(13) 1 d G . . D -3
 C44E C 0.5760(19) 0.552(2) 0.6673(19) 0.0209(12) Uiso 0.0240(13) 1 d G . . D
 -3
 C45E C 0.5419(19) 0.486(2) 0.6869(19) 0.0209(12) Uiso 0.0240(13) 1 d G . . D
 -3
 C46E C 0.676(2) 0.568(2) 0.508(2) 0.0209(12) Uiso 0.0240(13) 1 d G . . D -3
 C47E C 0.6354(19) 0.551(2) 0.6248(19) 0.0209(12) Uiso 0.0240(13) 1 d G . . D
 -3
 C48E C 0.659(2) 0.4597(19) 0.406(2) 0.0209(12) Uiso 0.0240(13) 1 d G . . D -3
 C49E C 0.514(2) 0.3096(18) 0.522(2) 0.0209(12) Uiso 0.0240(13) 1 d G . . D -3
 C50E C 0.539(2) 0.3202(18) 0.449(2) 0.0209(12) Uiso 0.0240(13) 1 d G . . D -3
 C51E C 0.604(2) 0.3524(18) 0.438(2) 0.0209(12) Uiso 0.0240(13) 1 d G . . D -3
 C52E C 0.521(2) 0.367(2) 0.638(2) 0.0209(12) Uiso 0.0240(13) 1 d G . . D -3
 C53E C 0.5690(19) 0.422(2) 0.663(2) 0.0209(12) Uiso 0.0240(13) 1 d G . . D -3
 C54E C 0.6893(19) 0.495(2) 0.527(2) 0.0209(12) Uiso 0.0240(13) 1 d G . . D -3
 C55E C 0.6641(19) 0.484(2) 0.600(2) 0.0209(12) Uiso 0.0240(13) 1 d G . . D -3
 C56E C 0.6810(19) 0.442(2) 0.478(2) 0.0209(12) Uiso 0.0240(13) 1 d G . . D -3
 C57E C 0.555(2) 0.332(2) 0.578(2) 0.0209(12) Uiso 0.0240(13) 1 d G . . D -3
 C58E C 0.647(2) 0.3756(19) 0.497(2) 0.0209(12) Uiso 0.0240(13) 1 d G . . D -3
 C59E C 0.6318(19) 0.422(2) 0.618(2) 0.0209(12) Uiso 0.0240(13) 1 d G . . D -3
 C60E C 0.623(2) 0.366(2) 0.566(2) 0.0209(12) Uiso 0.0240(13) 1 d G . . D -3
 C1F C 0.3360(17) 0.4708(18) 0.5747(16) 0.0209(12) Uiso 0.0373(17) 1 d . . . E
 -4
 C2F C 0.3347(16) 0.4245(18) 0.5159(17) 0.0209(12) Uiso 0.0373(17) 1 d G . . E
 -4
 C3F C 0.3787(17) 0.3642(17) 0.5145(17) 0.0209(12) Uiso 0.0373(17) 1 d G . . E
 -4
 C4F C 0.4264(17) 0.3502(17) 0.5736(17) 0.0209(12) Uiso 0.0373(17) 1 d G . . E
 -4
 C5F C 0.4276(18) 0.3953(19) 0.6309(16) 0.0209(12) Uiso 0.0373(17) 1 d G . . E
 -4
 C6F C 0.3812(18) 0.4570(19) 0.6326(15) 0.0209(12) Uiso 0.0373(17) 1 d G . . E
 -4
 C7F C 0.3893(17) 0.6491(16) 0.4651(16) 0.0209(12) Uiso 0.0373(17) 1 d G . . E
 -4
 C8F C 0.3506(16) 0.5910(17) 0.4321(15) 0.0209(12) Uiso 0.0373(17) 1 d G . . E
 -4
 C9F C 0.3958(18) 0.6522(17) 0.5378(16) 0.0209(12) Uiso 0.0373(17) 1 d G . . E
 -4
 C10F C 0.4498(17) 0.6659(16) 0.4202(16) 0.0209(12) Uiso 0.0373(17) 1 d G . .
 E -4
 C11F C 0.3207(16) 0.5375(17) 0.4749(16) 0.0209(12) Uiso 0.0373(17) 1 d G . .
 E -4
 C12F C 0.3872(17) 0.5718(17) 0.3669(15) 0.0209(12) Uiso 0.0373(17) 1 d G . .
 E -4
 C13F C 0.3639(17) 0.5972(18) 0.5817(15) 0.0209(12) Uiso 0.0373(17) 1 d G . .
 E -4
 C14F C 0.4631(18) 0.6721(17) 0.5697(16) 0.0209(12) Uiso 0.0373(17) 1 d G . .
 E -4
 C15F C 0.5135(17) 0.6849(15) 0.4505(17) 0.0209(12) Uiso 0.0373(17) 1 d G . .
 E -4
 C16F C 0.4485(17) 0.6182(16) 0.3595(15) 0.0209(12) Uiso 0.0373(17) 1 d G . .
 E -4
 C17F C 0.3273(17) 0.5406(18) 0.5494(15) 0.0209(12) Uiso 0.0373(17) 1 d G . .
 E -4
 C18F C 0.3253(16) 0.4657(17) 0.4542(16) 0.0209(12) Uiso 0.0373(17) 1 d G . .
 E -4
 C19F C 0.3917(17) 0.5019(17) 0.3468(15) 0.0209(12) Uiso 0.0373(17) 1 d G . .
 E -4
 C20F C 0.4116(18) 0.5832(19) 0.6408(15) 0.0209(12) Uiso 0.0373(17) 1 d G . .
 E -4
 C21F C 0.5204(18) 0.6879(16) 0.5272(17) 0.0209(12) Uiso 0.0373(17) 1 d G . .
 E -4
 C22F C 0.4729(19) 0.6295(18) 0.6333(16) 0.0209(12) Uiso 0.0373(17) 1 d G . .
 E -4
 C23F C 0.5797(17) 0.6570(15) 0.4218(18) 0.0209(12) Uiso 0.0373(17) 1 d G . .
 E -4
 C24F C 0.5111(17) 0.5919(16) 0.3325(15) 0.0209(12) Uiso 0.0373(17) 1 d G . .
 E -4
 C25F C 0.3598(17) 0.4470(17) 0.3905(16) 0.0209(12) Uiso 0.0373(17) 1 d G . .
 E -4
 C26F C 0.4577(18) 0.4741(17) 0.3181(15) 0.0209(12) Uiso 0.0373(17) 1 d G . .
 E -4
 C27F C 0.4199(18) 0.515(2) 0.6655(14) 0.0209(12) Uiso 0.0373(17) 1 d G . . E
 -4
 C28F C 0.5907(18) 0.6621(16) 0.5461(18) 0.0209(12) Uiso 0.0373(17) 1 d G . .
 E -4
 C29F C 0.5393(19) 0.6051(19) 0.6511(16) 0.0209(12) Uiso 0.0373(17) 1 d G . .
 E -4
 C30F C 0.5784(17) 0.6119(15) 0.3644(17) 0.0209(12) Uiso 0.0373(17) 1 d G . .
 E -4
 C31F C 0.6273(17) 0.6430(16) 0.4809(18) 0.0209(12) Uiso 0.0373(17) 1 d G . .
 E -4
 C32F C 0.5158(18) 0.5180(16) 0.3111(15) 0.0209(12) Uiso 0.0373(17) 1 d G . .
 E -4
 C33F C 0.4061(17) 0.3853(16) 0.3891(16) 0.0209(12) Uiso 0.0373(17) 1 d G . .
 E -4
 C34F C 0.4667(18) 0.4021(16) 0.3443(15) 0.0209(12) Uiso 0.0373(17) 1 d G . .
 E -4
 C35F C 0.4903(19) 0.489(2) 0.6843(14) 0.0209(12) Uiso 0.0373(17) 1 d G . . E
 -4
 C36F C 0.5999(18) 0.6219(18) 0.6063(17) 0.0209(12) Uiso 0.0373(17) 1 d G . .
 E -4
 C37F C 0.5482(19) 0.533(2) 0.6774(15) 0.0209(12) Uiso 0.0373(17) 1 d G . . E
 -4
 C38F C 0.6248(17) 0.5501(16) 0.3629(17) 0.0209(12) Uiso 0.0373(17) 1 d G . .
 E -4
 C39F C 0.6711(16) 0.5846(16) 0.4794(18) 0.0209(12) Uiso 0.0373(17) 1 d G . .
 E -4
 C40F C 0.5860(17) 0.4920(16) 0.3299(15) 0.0209(12) Uiso 0.0373(17) 1 d G . .
 E -4
 C41F C 0.4153(17) 0.3450(16) 0.4492(17) 0.0209(12) Uiso 0.0373(17) 1 d G . .
 E -4
 C42F C 0.5332(18) 0.3776(16) 0.3621(16) 0.0209(12) Uiso 0.0373(17) 1 d G . .
 E -4
 C43F C 0.4949(18) 0.4152(19) 0.6630(15) 0.0209(12) Uiso 0.0373(17) 1 d G . .
 E -4
 C44F C 0.6463(17) 0.5602(18) 0.6047(17) 0.0209(12) Uiso 0.0373(17) 1 d G . .
 E -4
 C45F C 0.6143(18) 0.5052(19) 0.6486(16) 0.0209(12) Uiso 0.0373(17) 1 d G . .
 E -4
 C46F C 0.6698(16) 0.5369(16) 0.4189(18) 0.0209(12) Uiso 0.0373(17) 1 d G . .
 E -4
 C47F C 0.6809(16) 0.5420(17) 0.5431(18) 0.0209(12) Uiso 0.0373(17) 1 d G . .
 E -4
 C48F C 0.5946(17) 0.4239(16) 0.3546(16) 0.0209(12) Uiso 0.0373(17) 1 d G . .
 E -4
 C49F C 0.4924(18) 0.3223(16) 0.5449(17) 0.0209(12) Uiso 0.0373(17) 1 d G . .
 E -4
 C50F C 0.4856(18) 0.3191(15) 0.4681(17) 0.0209(12) Uiso 0.0373(17) 1 d G . .
 E -4
 C51F C 0.5429(18) 0.3351(15) 0.4257(17) 0.0209(12) Uiso 0.0373(17) 1 d G . .
 E -4
 C52F C 0.5575(18) 0.3889(18) 0.6358(16) 0.0209(12) Uiso 0.0373(17) 1 d G . .
 E -4
 C53F C 0.6187(18) 0.4352(19) 0.6285(16) 0.0209(12) Uiso 0.0373(17) 1 d G . .
 E -4
 C54F C 0.6788(16) 0.4648(16) 0.4449(17) 0.0209(12) Uiso 0.0373(17) 1 d G . .
 E -4
 C55F C 0.6856(16) 0.4680(17) 0.5219(18) 0.0209(12) Uiso 0.0373(17) 1 d G . .
 E -4
 C56F C 0.6421(17) 0.4099(16) 0.4138(17) 0.0209(12) Uiso 0.0373(17) 1 d G . .
 E -4
 C57F C 0.5562(17) 0.3413(17) 0.5751(17) 0.0209(12) Uiso 0.0373(17) 1 d G . .
 E -4
 C58F C 0.6102(17) 0.3550(15) 0.4575(17) 0.0209(12) Uiso 0.0373(17) 1 d G . .
 E -4
 C59F C 0.6554(17) 0.4161(17) 0.5632(17) 0.0209(12) Uiso 0.0373(17) 1 d G . .
 E -4
 C60F C 0.6167(17) 0.3581(16) 0.5303(17) 0.0209(12) Uiso 0.0373(17) 1 d G . .
 E -4
 C1G C 0.3357(14) 0.4513(12) 0.5751(14) 0.0209(12) Uiso 0.0369(14) 1 d . . . F
 -5
 C2G C 0.3430(14) 0.3968(12) 0.5243(15) 0.0209(12) Uiso 0.0369(14) 1 d G . . F
 -5
 C3G C 0.3946(15) 0.3435(11) 0.5334(16) 0.0209(12) Uiso 0.0369(14) 1 d G . . F
 -5
 C4G C 0.4410(15) 0.3453(12) 0.5950(15) 0.0209(12) Uiso 0.0369(14) 1 d G . . F
 -5
 C5G C 0.4337(15) 0.3984(13) 0.6446(14) 0.0209(12) Uiso 0.0369(14) 1 d G . . F
 -5
 C6G C 0.3797(15) 0.4527(13) 0.6354(13) 0.0209(12) Uiso 0.0369(14) 1 d G . . F
 -5
 C7G C 0.3700(15) 0.6163(12) 0.4400(15) 0.0209(12) Uiso 0.0369(14) 1 d G . . F
 -5
 C8G C 0.3407(14) 0.5492(14) 0.4158(14) 0.0209(12) Uiso 0.0369(14) 1 d G . . F
 -5
 C9G C 0.3728(15) 0.6313(11) 0.5115(15) 0.0209(12) Uiso 0.0369(14) 1 d G . . F
 -5
 C10G C 0.4297(16) 0.6341(13) 0.3946(15) 0.0209(12) Uiso 0.0369(14) 1 d G . .
 F -5
 C11G C 0.3162(14) 0.4993(13) 0.4657(14) 0.0209(12) Uiso 0.0369(14) 1 d G . .
 F -5
 C12G C 0.3823(15) 0.5255(15) 0.3552(13) 0.0209(12) Uiso 0.0369(14) 1 d G . .
 F -5
 C13G C 0.3464(14) 0.5799(12) 0.5627(14) 0.0209(12) Uiso 0.0369(14) 1 d G . .
 F -5
 C14G C 0.4355(15) 0.6649(11) 0.5415(16) 0.0209(12) Uiso 0.0369(14) 1 d G . .
 F -5
 C15G C 0.4890(16) 0.6660(12) 0.4229(16) 0.0209(12) Uiso 0.0369(14) 1 d G . .
 F -5
 C16G C 0.4373(16) 0.5780(15) 0.3421(13) 0.0209(12) Uiso 0.0369(14) 1 d G . .
 F -5
 C17G C 0.3191(14) 0.5146(12) 0.5389(14) 0.0209(12) Uiso 0.0369(14) 1 d G . .
 F -5
 C18G C 0.3310(14) 0.4265(13) 0.4567(15) 0.0209(12) Uiso 0.0369(14) 1 d G . .
 F -5
 C19G C 0.3968(15) 0.4545(15) 0.3464(13) 0.0209(12) Uiso 0.0369(14) 1 d G . .
 F -5
 C20G C 0.3929(15) 0.5817(13) 0.6244(14) 0.0209(12) Uiso 0.0369(14) 1 d G . .
 F -5
 C21G C 0.4920(16) 0.6816(11) 0.4984(17) 0.0209(12) Uiso 0.0369(14) 1 d G . .
 F -5
 C22G C 0.4479(15) 0.6342(12) 0.6112(15) 0.0209(12) Uiso 0.0369(14) 1 d G . .
 F -5
 C23G C 0.5594(16) 0.6434(12) 0.4005(16) 0.0209(12) Uiso 0.0369(14) 1 d G . .
 F -5
 C24G C 0.5039(16) 0.5566(15) 0.3210(13) 0.0209(12) Uiso 0.0369(14) 1 d G . .
 F -5
 C25G C 0.3704(15) 0.4031(14) 0.3976(14) 0.0209(12) Uiso 0.0369(14) 1 d G . .
 F -5
 C26G C 0.4671(16) 0.4319(15) 0.3241(13) 0.0209(12) Uiso 0.0369(14) 1 d G . .
 F -5
 C27G C 0.4090(15) 0.5198(14) 0.6597(13) 0.0209(12) Uiso 0.0369(14) 1 d G . .
 F -5
 C28G C 0.5643(15) 0.6688(11) 0.5227(17) 0.0209(12) Uiso 0.0369(14) 1 d G . .
 F -5
 C29G C 0.5162(15) 0.6220(13) 0.6342(15) 0.0209(12) Uiso 0.0369(14) 1 d G . .
 F -5
 C30G C 0.5666(16) 0.5902(14) 0.3509(15) 0.0209(12) Uiso 0.0369(14) 1 d G . .
 F -5
 C31G C 0.6058(15) 0.6451(12) 0.4622(17) 0.0209(12) Uiso 0.0369(14) 1 d G . .
 F -5
 C32G C 0.5192(16) 0.4816(15) 0.3116(13) 0.0209(12) Uiso 0.0369(14) 1 d G . .
 F -5
 C33G C 0.4244(15) 0.3488(13) 0.4069(15) 0.0209(12) Uiso 0.0369(14) 1 d G . .
 F -5
 C34G C 0.4842(16) 0.3667(13) 0.3614(15) 0.0209(12) Uiso 0.0369(14) 1 d G . .
 F -5
 C35G C 0.4812(15) 0.5071(15) 0.6840(13) 0.0209(12) Uiso 0.0369(14) 1 d G . .
 F -5
 C36G C 0.5759(15) 0.6398(13) 0.5887(16) 0.0209(12) Uiso 0.0369(14) 1 d G . .
 F -5
 C37G C 0.5332(15) 0.5568(15) 0.6716(13) 0.0209(12) Uiso 0.0369(14) 1 d G . .
 F -5
 C38G C 0.6207(15) 0.5358(14) 0.3602(14) 0.0209(12) Uiso 0.0369(14) 1 d G . .
 F -5
 C39G C 0.6569(14) 0.5937(13) 0.4708(16) 0.0209(12) Uiso 0.0369(14) 1 d G . .
 F -5
 C40G C 0.5913(15) 0.4687(14) 0.3358(13) 0.0209(12) Uiso 0.0369(14) 1 d G . .
 F -5
 C41G C 0.4362(15) 0.3198(11) 0.4728(16) 0.0209(12) Uiso 0.0369(14) 1 d G . .
 F -5
 C42G C 0.5526(15) 0.3544(13) 0.3843(15) 0.0209(12) Uiso 0.0369(14) 1 d G . .
 F -5
 C43G C 0.4964(15) 0.4319(15) 0.6747(13) 0.0209(12) Uiso 0.0369(14) 1 d G . .
 F -5
 C44G C 0.6300(15) 0.5855(14) 0.5978(15) 0.0209(12) Uiso 0.0369(14) 1 d G . .
 F -5
 C45G C 0.6036(15) 0.5341(15) 0.6491(14) 0.0209(12) Uiso 0.0369(14) 1 d G . .
 F -5
 C46G C 0.6646(14) 0.5376(13) 0.4185(15) 0.0209(12) Uiso 0.0369(14) 1 d G . .
 F -5
 C47G C 0.6693(14) 0.5631(14) 0.5406(16) 0.0209(12) Uiso 0.0369(14) 1 d G . .
 F -5
 C48G C 0.6077(15) 0.4069(13) 0.3711(14) 0.0209(12) Uiso 0.0369(14) 1 d G . .
 F -5
 C49G C 0.5114(15) 0.3227(12) 0.5727(16) 0.0209(12) Uiso 0.0369(14) 1 d G . .
 F -5
 C50G C 0.5084(15) 0.3069(11) 0.4971(16) 0.0209(12) Uiso 0.0369(14) 1 d G . .
 F -5
 C51G C 0.5649(15) 0.3239(11) 0.4540(16) 0.0209(12) Uiso 0.0369(14) 1 d G . .
 F -5
 C52G C 0.5630(15) 0.4106(15) 0.6535(14) 0.0209(12) Uiso 0.0369(14) 1 d G . .
 F -5
 C53G C 0.6180(15) 0.4631(15) 0.6403(14) 0.0209(12) Uiso 0.0369(14) 1 d G . .
 F -5
 C54G C 0.6816(14) 0.4722(13) 0.4558(15) 0.0209(12) Uiso 0.0369(14) 1 d G . .
 F -5
 C55G C 0.6846(14) 0.4880(14) 0.5314(15) 0.0209(12) Uiso 0.0369(14) 1 d G . .
 F -5
 C56G C 0.6540(14) 0.4087(13) 0.4328(15) 0.0209(12) Uiso 0.0369(14) 1 d G . .
 F -5
 C57G C 0.5707(15) 0.3544(13) 0.6010(15) 0.0209(12) Uiso 0.0369(14) 1 d G . .
 F -5
 C58G C 0.6276(15) 0.3573(12) 0.4839(16) 0.0209(12) Uiso 0.0369(14) 1 d G . .
 F -5
 C59G C 0.6597(14) 0.4394(14) 0.5797(15) 0.0209(12) Uiso 0.0369(14) 1 d G . .
 F -5
 C60G C 0.6304(15) 0.3723(13) 0.5555(15) 0.0209(12) Uiso 0.0369(14) 1 d G . .
 F -5
 C1H C 0.3455(19) 0.4735(18) 0.5966(19) 0.0209(12) Uiso 0.0251(12) 1 d . . . G
 -6
 C2H C 0.3522(19) 0.4101(18) 0.557(2) 0.0209(12) Uiso 0.0251(12) 1 d G . . G
 -6
 C3H C 0.406(2) 0.3611(17) 0.574(2) 0.0209(12) Uiso 0.0251(12) 1 d G . . G -6
 C4H C 0.456(2) 0.3765(18) 0.6309(19) 0.0209(12) Uiso 0.0251(12) 1 d G . . G
 -6
 C5H C 0.449(2) 0.4383(19) 0.6693(18) 0.0209(12) Uiso 0.0251(12) 1 d G . . G
 -6
 C6H C 0.393(2) 0.4882(19) 0.6528(18) 0.0209(12) Uiso 0.0251(12) 1 d G . . G
 -6
 C7H C 0.3662(19) 0.6089(19) 0.4297(19) 0.0209(12) Uiso 0.0251(12) 1 d G . . G
 -6
 C8H C 0.3383(19) 0.537(2) 0.4211(18) 0.0209(12) Uiso 0.0251(12) 1 d G . . G
 -6
 C9H C 0.3723(19) 0.6380(18) 0.4963(19) 0.0209(12) Uiso 0.0251(12) 1 d G . . G
 -6
 C10H C 0.423(2) 0.619(2) 0.3780(18) 0.0209(12) Uiso 0.0251(12) 1 d G . . G -6
 C11H C 0.3184(18) 0.4981(19) 0.4813(19) 0.0209(12) Uiso 0.0251(12) 1 d G . .
 G -6
 C13H C 0.3507(19) 0.5973(18) 0.5583(19) 0.0209(12) Uiso 0.0251(12) 1 d G . .
 G -6
 C12H C 0.378(2) 0.503(2) 0.3640(18) 0.0209(12) Uiso 0.0251(12) 1 d G . . G -6
 C14H C 0.435(2) 0.6785(17) 0.515(2) 0.0209(12) Uiso 0.0251(12) 1 d G . . G -6
 C15H C 0.482(2) 0.6572(19) 0.3958(19) 0.0209(12) Uiso 0.0251(12) 1 d G . . G
 -6
 C16H C 0.430(2) 0.553(2) 0.3375(17) 0.0209(12) Uiso 0.0251(12) 1 d G . . G -6
 C17H C 0.3246(18) 0.5278(18) 0.5497(19) 0.0209(12) Uiso 0.0251(12) 1 d G . .
 G -6
 C18H C 0.3354(19) 0.4253(19) 0.486(2) 0.0209(12) Uiso 0.0251(12) 1 d G . . G
 -6
 C19H C 0.394(2) 0.432(2) 0.3688(18) 0.0209(12) Uiso 0.0251(12) 1 d G . . G -6
 C20H C 0.400(2) 0.6126(18) 0.6155(18) 0.0209(12) Uiso 0.0251(12) 1 d G . . G
 -6
 C21H C 0.489(2) 0.6877(17) 0.466(2) 0.0209(12) Uiso 0.0251(12) 1 d G . . G -6
 C22H C 0.452(2) 0.6628(17) 0.5888(19) 0.0209(12) Uiso 0.0251(12) 1 d G . . G
 -6
 C23H C 0.552(2) 0.632(2) 0.3742(19) 0.0209(12) Uiso 0.0251(12) 1 d G . . G -6
 C24H C 0.496(2) 0.530(2) 0.3170(17) 0.0209(12) Uiso 0.0251(12) 1 d G . . G -6
 C25H C 0.372(2) 0.3915(19) 0.431(2) 0.0209(12) Uiso 0.0251(12) 1 d G . . G -6
 C26H C 0.464(2) 0.408(2) 0.3472(19) 0.0209(12) Uiso 0.0251(12) 1 d G . . G -6
 C27H C 0.421(2) 0.5596(19) 0.6614(17) 0.0209(12) Uiso 0.0251(12) 1 d G . . G
 -6
 C28H C 0.563(2) 0.6820(17) 0.488(2) 0.0209(12) Uiso 0.0251(12) 1 d G . . G -6
 C29H C 0.522(2) 0.6574(17) 0.610(2) 0.0209(12) Uiso 0.0251(12) 1 d G . . G -6
 C30H C 0.559(2) 0.571(2) 0.3358(18) 0.0209(12) Uiso 0.0251(12) 1 d G . . G -6
 C31H C 0.602(2) 0.6477(19) 0.431(2) 0.0209(12) Uiso 0.0251(12) 1 d G . . G -6
 C32H C 0.513(2) 0.455(2) 0.3219(18) 0.0209(12) Uiso 0.0251(12) 1 d G . . G -6
 C33H C 0.429(2) 0.3417(18) 0.447(2) 0.0209(12) Uiso 0.0251(12) 1 d G . . G -6
 C34H C 0.485(2) 0.3516(19) 0.396(2) 0.0209(12) Uiso 0.0251(12) 1 d G . . G -6
 C35H C 0.494(2) 0.5539(19) 0.6833(17) 0.0209(12) Uiso 0.0251(12) 1 d G . . G
 -6
 C36H C 0.579(2) 0.6673(17) 0.558(2) 0.0209(12) Uiso 0.0251(12) 1 d G . . G -6
 C37H C 0.544(2) 0.6014(19) 0.6582(18) 0.0209(12) Uiso 0.0251(12) 1 d G . . G
 -6
 C38H C 0.615(2) 0.521(2) 0.3525(19) 0.0209(12) Uiso 0.0251(12) 1 d G . . G -6
 C39H C 0.6551(19) 0.601(2) 0.447(2) 0.0209(12) Uiso 0.0251(12) 1 d G . . G -6
 C40H C 0.587(2) 0.449(2) 0.3438(19) 0.0209(12) Uiso 0.0251(12) 1 d G . . G -6
 C41H C 0.445(2) 0.3268(17) 0.517(2) 0.0209(12) Uiso 0.0251(12) 1 d G . . G -6
 C42H C 0.555(2) 0.3460(19) 0.416(2) 0.0209(12) Uiso 0.0251(12) 1 d G . . G -6
 C43H C 0.512(2) 0.4788(19) 0.6882(17) 0.0209(12) Uiso 0.0251(12) 1 d G . . G
 -6
 C44H C 0.6353(19) 0.6173(19) 0.574(2) 0.0209(12) Uiso 0.0251(12) 1 d G . . G
 -6
 C45H C 0.614(2) 0.5767(19) 0.6364(19) 0.0209(12) Uiso 0.0251(12) 1 d G . . G
 -6
 C46H C 0.6620(19) 0.535(2) 0.407(2) 0.0209(12) Uiso 0.0251(12) 1 d G . . G -6
 C47H C 0.6724(19) 0.5848(19) 0.521(2) 0.0209(12) Uiso 0.0251(12) 1 d G . . G
 -6
 C48H C 0.608(2) 0.396(2) 0.390(2) 0.0209(12) Uiso 0.0251(12) 1 d G . . G -6
 C49H C 0.526(2) 0.3517(17) 0.609(2) 0.0209(12) Uiso 0.0251(12) 1 d G . . G -6
 C50H C 0.519(2) 0.3210(17) 0.539(2) 0.0209(12) Uiso 0.0251(12) 1 d G . . G -6
 C51H C 0.573(2) 0.3305(17) 0.490(2) 0.0209(12) Uiso 0.0251(12) 1 d G . . G -6
 C52H C 0.578(2) 0.4555(19) 0.6678(18) 0.0209(12) Uiso 0.0251(12) 1 d G . . G
 -6
 C53H C 0.630(2) 0.506(2) 0.6411(19) 0.0209(12) Uiso 0.0251(12) 1 d G . . G -6
 C54H C 0.6835(19) 0.479(2) 0.455(2) 0.0209(12) Uiso 0.0251(12) 1 d G . . G -6
 C55H C 0.6900(18) 0.510(2) 0.526(2) 0.0209(12) Uiso 0.0251(12) 1 d G . . G -6
 C56H C 0.6571(19) 0.412(2) 0.447(2) 0.0209(12) Uiso 0.0251(12) 1 d G . . G -6
 C57H C 0.585(2) 0.3901(18) 0.627(2) 0.0209(12) Uiso 0.0251(12) 1 d G . . G -6
 C58H C 0.635(2) 0.3709(18) 0.509(2) 0.0209(12) Uiso 0.0251(12) 1 d G . . G -6
 C59H C 0.6695(19) 0.471(2) 0.584(2) 0.0209(12) Uiso 0.0251(12) 1 d G . . G -6
 C60H C 0.642(2) 0.4000(19) 0.575(2) 0.0209(12) Uiso 0.0251(12) 1 d G . . G -6
 C10 C 0.4977(14) 0.0394(15) 0.5366(13) 0.053(5) Uiso 0.1667 1 d D U . H -1
 C11 C 0.4433(19) 0.0415(19) 0.4871(18) 0.102(12) Uiso 0.1667 1 d DG U . H -1
 H11 H 0.407464 0.076521 0.490644 0.122 Uiso 0.1667 1 calc R . . H -1
 C12 C 0.4414(19) -0.0077(17) 0.4325(16) 0.086(10) Uiso 0.1667 1 d DG U . H -1
 C13 C 0.4938(15) -0.0590(12) 0.4274(11) 0.045(5) Uiso 0.1667 1 d DG U . H -1
 H13 H 0.492458 -0.092658 0.390028 0.054 Uiso 0.1667 1 calc R . . H -1
 C14 C 0.5482(14) -0.0611(13) 0.4768(14) 0.070(8) Uiso 0.1667 1 d DG U . H -1
 C15 C 0.5501(13) -0.0119(14) 0.5314(13) 0.078(9) Uiso 0.1667 1 d DG U . H -1
 H15 H 0.587248 -0.013383 0.565240 0.093 Uiso 0.1667 1 calc R . . H -1
 C16 C 0.5032(9) 0.0957(8) 0.5950(7) 0.027(3) Uiso 0.1667 1 d D U . H -1
 H16A H 0.456671 0.117344 0.602513 0.040 Uiso 0.1667 1 calc GR . . H -1
 H16B H 0.537092 0.132176 0.580615 0.040 Uiso 0.1667 1 calc GR . . H -1
 H16C H 0.519242 0.073479 0.638952 0.040 Uiso 0.1667 1 calc GR . . H -1
 C17 C 0.389(2) 0.002(2) 0.3714(16) 0.113(11) Uiso 0.1667 1 d D U . H -1
 H17A H 0.413685 0.021411 0.330156 0.169 Uiso 0.1667 1 calc GR . . H -1
 H17B H 0.351496 0.035220 0.385912 0.169 Uiso 0.1667 1 calc GR . . H -1
 H17C H 0.367649 -0.043454 0.359142 0.169 Uiso 0.1667 1 calc GR . . H -1
 C18 C 0.6007(14) -0.1227(11) 0.4776(12) 0.055(6) Uiso 0.1667 1 d D U . H -1
 H18A H 0.646391 -0.106709 0.459000 0.083 Uiso 0.1667 1 calc GR . . H -1
 H18B H 0.582610 -0.161292 0.448058 0.083 Uiso 0.1667 1 calc GR . . H -1
 H18C H 0.606840 -0.139622 0.526227 0.083 Uiso 0.1667 1 calc GR . . H -1

loop_
  _atom_site_aniso_label
  _atom_site_aniso_U_11
  _atom_site_aniso_U_22
  _atom_site_aniso_U_33
  _atom_site_aniso_U_23
  _atom_site_aniso_U_13
  _atom_site_aniso_U_12
 S1A 0.0644(18) 0.0553(17) 0.0598(16) -0.0167(12) -0.0204(12) 0.0153(13)
 N1A 0.072(5) 0.040(5) 0.044(5) -0.006(3) -0.012(4) 0.009(4)
 N2A 0.031(4) 0.056(7) 0.069(7) -0.013(5) -0.009(4) -0.001(5)
 C1A 0.042(4) 0.015(3) 0.025(4) 0.003(3) -0.001(3) -0.001(3)
 C2A 0.047(4) 0.020(4) 0.028(4) -0.001(3) -0.007(3) -0.002(3)
 C3A 0.050(4) 0.029(5) 0.038(5) -0.007(3) -0.008(3) 0.002(3)
 C4A 0.050(5) 0.048(7) 0.047(6) -0.006(4) -0.005(4) 0.004(4)
 C5A 0.060(5) 0.065(9) 0.068(7) 0.020(5) 0.005(5) -0.017(6)
 C6A 0.048(5) 0.036(6) 0.047(5) 0.011(4) -0.001(4) -0.003(4)
 S1B 0.056(2) 0.134(5) 0.141(6) -0.091(4) -0.046(3) 0.047(3)
 N1B 0.050(6) 0.099(10) 0.127(12) -0.059(8) -0.021(7) 0.019(7)
 N2B 0.071(6) 0.070(9) 0.079(9) -0.035(6) -0.038(6) 0.036(6)
 C1B 0.037(4) 0.057(8) 0.063(9) -0.026(5) -0.010(4) 0.002(4)
 C2B 0.050(5) 0.051(7) 0.052(7) -0.018(4) -0.014(5) 0.013(5)
 C3B 0.063(5) 0.038(7) 0.064(8) -0.001(4) -0.003(5) -0.002(4)
 C4B 0.038(5) 0.053(8) 0.062(8) 0.004(5) 0.000(5) -0.001(4)
 C5B 0.041(5) 0.035(6) 0.076(8) 0.009(4) 0.012(4) -0.007(4)
 C6B 0.045(4) 0.049(7) 0.073(8) -0.012(5) 0.017(5) -0.016(4)
 C7 0.0401(13) 0.0401(13) 0.0401(13) 0.0004(14) 0.0004(14) -0.0004(14)
 C8 0.074(2) 0.074(2) 0.074(2) 0.021(2) 0.021(2) -0.021(2)

_geom_special_details
;
 All esds (except the esd in the dihedral angle between two l.s. planes)
 are estimated using the full covariance matrix.  The cell esds are taken
 into account individually in the estimation of esds in distances, angles
 and torsion angles; correlations between esds in cell parameters are only
 used when they are defined by crystal symmetry.  An approximate (isotropic)
 treatment of cell esds is used for estimating esds involving l.s. planes.
;
loop_
  _geom_bond_atom_site_label_1
  _geom_bond_atom_site_label_2
  _geom_bond_distance
  _geom_bond_site_symmetry_2
  _geom_bond_publ_flag
 S1A N1A 1.618(8) . ?
 S1A N2A 1.616(8) . ?
 N1A C3A 1.326(11) . ?
 N2A C4A 1.329(14) . ?
 C1A C2A 1.3900 . ?
 C1A C6A 1.3900 . ?
 C1A C7 1.528(6) . ?
 C2A H2A 0.9500 . ?
 C2A C3A 1.3900 . ?
 C3A C4A 1.3900 . ?
 C4A C5A 1.3900 . ?
 C5A H5A 0.9500 . ?
 C5A C6A 1.3900 . ?
 C6A C8 1.698(6) . ?
 S1B N1B 1.618(8) . ?
 S1B N2B 1.619(8) . ?
 S1B C1B 2.300(7) . ?
 N1B C1B 1.336(14) . ?
 N2B C2B 1.341(13) . ?
 C1B C2B 1.3900 . ?
 C1B C6B 1.3900 . ?
 C2B C3B 1.3900 . ?
 C3B H3B 0.9500 . ?
 C3B C4B 1.3900 . ?
 C4B C5B 1.3900 . ?
 C4B C7 1.480(7) . ?
 C5B C6B 1.3900 . ?
 C5B C8 1.324(7) . ?
 C6B H6B 0.9500 . ?
 C7 H7A 1.0000 . ?
 C7 H7B 1.0000 . ?
 C8 H8B 1.0000 . ?
 C8 H8A 1.0000 . ?
 C1C C2C 1.4607 . ?
 C1C C6C 1.3801 . ?
 C1C C10C 1.4591 . ?
 C2C C3C 1.4107 . ?
 C2C C57C 1.4592 . ?
 C3C C4C 1.4148 . ?
 C3C C54C 1.4154 . ?
 C4C C5C 1.4115 . ?
 C4C C37C 1.4135 . ?
 C5C C6C 1.4588 . ?
 C5C C40C 1.4610 . ?
 C6C C7C 1.4589 . ?
 C7C C8C 1.3809 . ?
 C7C C41C 1.4591 . ?
 C8C C9C 1.4572 . ?
 C8C C48C 1.4606 . ?
 C9C C10C 1.3815 . ?
 C9C C14C 1.4593 . ?
 C10C C11C 1.4594 . ?
 C11C C12C 1.3816 . ?
 C11C C57C 1.4584 . ?
 C12C C13C 1.4587 . ?
 C12C C59C 1.4565 . ?
 C13C C14C 1.3814 . ?
 C13C C18C 1.4607 . ?
 C14C C15C 1.4583 . ?
 C15C C16C 1.3793 . ?
 C15C C48C 1.4598 . ?
 C16C C17C 1.4579 . ?
 C16C C47C 1.4605 . ?
 C17C C18C 1.3802 . ?
 C17C C22C 1.4580 . ?
 C18C C19C 1.4596 . ?
 C19C C20C 1.3807 . ?
 C19C C59C 1.4592 . ?
 C20C C21C 1.4579 . ?
 C20C C53C 1.4604 . ?
 C21C C22C 1.3812 . ?
 C21C C26C 1.4579 . ?
 C22C C23C 1.4584 . ?
 C23C C24C 1.3786 . ?
 C23C C47C 1.4581 . ?
 C24C C25C 1.4585 . ?
 C24C C49C 1.4614 . ?
 C25C C26C 1.3819 . ?
 C25C C30C 1.4593 . ?
 C26C C27C 1.4580 . ?
 C27C C28C 1.3828 . ?
 C27C C53C 1.4567 . ?
 C28C C29C 1.4588 . ?
 C28C C50C 1.4608 . ?
 C29C C30C 1.3814 . ?
 C29C C34C 1.4599 . ?
 C30C C31C 1.4598 . ?
 C31C C32C 1.3806 . ?
 C31C C49C 1.4574 . ?
 C32C C33C 1.4591 . ?
 C32C C60C 1.4596 . ?
 C33C C34C 1.3794 . ?
 C33C C38C 1.4605 . ?
 C34C C35C 1.4585 . ?
 C35C C36C 1.4123 . ?
 C35C C50C 1.4584 . ?
 C36C C37C 1.4139 . ?
 C36C C54C 1.4148 . ?
 C37C C38C 1.4121 . ?
 C38C C39C 1.4600 . ?
 C39C C40C 1.3792 . ?
 C39C C60C 1.4597 . ?
 C40C C41C 1.4580 . ?
 C41C C42C 1.3816 . ?
 C42C C43C 1.4578 . ?
 C42C C46C 1.4592 . ?
 C43C C44C 1.4597 . ?
 C43C C48C 1.3804 . ?
 C44C C45C 1.4588 . ?
 C44C C47C 1.3801 . ?
 C45C C46C 1.4600 . ?
 C45C C49C 1.3803 . ?
 C46C C60C 1.3794 . ?
 C50C C51C 1.3808 . ?
 C51C C52C 1.4585 . ?
 C51C C55C 1.4576 . ?
 C52C C53C 1.3820 . ?
 C52C C68C 1.4578 . ?
 C54C C55C 1.4142 . ?
 C55C C56C 1.4582 . ?
 C56C C57C 1.3799 . ?
 C56C C68C 1.4583 . ?
 C68C C59C 1.3820 . ?
 C1D C2D 1.4590 . ?
 C1D C6D 1.3786 . ?
 C1D C10D 1.4600 . ?
 C2D C3D 1.4108 . ?
 C2D C57D 1.4613 . ?
 C3D C4D 1.4151 . ?
 C3D C54D 1.4136 . ?
 C4D C5D 1.4124 . ?
 C4D C37D 1.4151 . ?
 C5D C6D 1.4603 . ?
 C5D C40D 1.4583 . ?
 C6D C7D 1.4606 . ?
 C7D C8D 1.3783 . ?
 C7D C41D 1.4585 . ?
 C8D C9D 1.4601 . ?
 C8D C48D 1.4593 . ?
 C9D C10D 1.3798 . ?
 C9D C14D 1.4578 . ?
 C10D C11D 1.4600 . ?
 C11D C12D 1.3798 . ?
 C11D C57D 1.4584 . ?
 C12D C13D 1.4609 . ?
 C12D C59D 1.4591 . ?
 C13D C14D 1.3810 . ?
 C13D C18D 1.4593 . ?
 C14D C15D 1.4608 . ?
 C15D C16D 1.3804 . ?
 C15D C48D 1.4591 . ?
 C16D C17D 1.4588 . ?
 C16D C47D 1.4575 . ?
 C17D C18D 1.3794 . ?
 C17D C22D 1.4602 . ?
 C18D C19D 1.4584 . ?
 C19D C20D 1.3814 . ?
 C19D C59D 1.4598 . ?
 C20D C21D 1.4602 . ?
 C20D C53D 1.4606 . ?
 C21D C22D 1.3801 . ?
 C21D C26D 1.4585 . ?
 C22D C23D 1.4595 . ?
 C23D C24D 1.3810 . ?
 C23D C47D 1.4597 . ?
 C24D C25D 1.4577 . ?
 C24D C49D 1.4604 . ?
 C25D C26D 1.3817 . ?
 C25D C30D 1.4615 . ?
 C26D C27D 1.4571 . ?
 C27D C28D 1.3804 . ?
 C27D C53D 1.4601 . ?
 C28D C29D 1.4607 . ?
 C28D C50D 1.4589 . ?
 C29D C30D 1.3797 . ?
 C29D C34D 1.4587 . ?
 C30D C31D 1.4598 . ?
 C31D C32D 1.3796 . ?
 C31D C49D 1.4589 . ?
 C32D C33D 1.4612 . ?
 C32D C60D 1.4591 . ?
 C33D C34D 1.3779 . ?
 C33D C38D 1.4598 . ?
 C34D C35D 1.4614 . ?
 C35D C36D 1.4094 . ?
 C35D C50D 1.4580 . ?
 C36D C37D 1.4146 . ?
 C36D C54D 1.4175 . ?
 C37D C38D 1.4123 . ?
 C38D C39D 1.4579 . ?
 C39D C40D 1.3806 . ?
 C39D C60D 1.4607 . ?
 C40D C41D 1.4605 . ?
 C41D C42D 1.3803 . ?
 C42D C43D 1.4581 . ?
 C42D C46D 1.4596 . ?
 C43D C44D 1.4600 . ?
 C43D C48D 1.3781 . ?
 C44D C45D 1.4600 . ?
 C44D C47D 1.3810 . ?
 C45D C46D 1.4585 . ?
 C45D C49D 1.3800 . ?
 C46D C60D 1.3795 . ?
 C50D C51D 1.3797 . ?
 C51D C52D 1.4582 . ?
 C51D C55D 1.4584 . ?
 C52D C53D 1.3798 . ?
 C52D C58D 1.4597 . ?
 C54D C55D 1.4136 . ?
 C55D C56D 1.4592 . ?
 C56D C57D 1.3787 . ?
 C56D C58D 1.4585 . ?
 C58D C59D 1.3800 . ?
 C1E C2E 1.4141 . ?
 C1E C6E 1.4122 . ?
 C1E C17E 1.4142 . ?
 C2E C3E 1.4113 . ?
 C2E C18E 1.4152 . ?
 C3E C4E 1.4582 . ?
 C3E C41E 1.4590 . ?
 C4E C5E 1.3803 . ?
 C4E C49E 1.4594 . ?
 C5E C6E 1.4595 . ?
 C5E C43E 1.4592 . ?
 C6E C27E 1.4590 . ?
 C7E C8E 1.4592 . ?
 C7E C9E 1.3794 . ?
 C7E C10E 1.4595 . ?
 C8E C11E 1.4121 . ?
 C8E C12E 1.4600 . ?
 C9E C13E 1.4610 . ?
 C9E C14E 1.4594 . ?
 C10E C15E 1.3802 . ?
 C10E C16E 1.4594 . ?
 C11E C17E 1.4140 . ?
 C11E C18E 1.4143 . ?
 C12E C16E 1.4585 . ?
 C12E C19E 1.3786 . ?
 C13E C17E 1.4118 . ?
 C13E C20E 1.4611 . ?
 C14E C21E 1.3811 . ?
 C14E C22E 1.4584 . ?
 C15E C21E 1.4579 . ?
 C15E C23E 1.4604 . ?
 C16E C24E 1.3812 . ?
 C18E C25E 1.4136 . ?
 C19E C25E 1.4595 . ?
 C19E C26E 1.4577 . ?
 C20E C22E 1.4586 . ?
 C20E C27E 1.3796 . ?
 C21E C28E 1.4608 . ?
 C22E C29E 1.3820 . ?
 C23E C30E 1.3804 . ?
 C23E C31E 1.4596 . ?
 C24E C30E 1.4588 . ?
 C24E C32E 1.4573 . ?
 C25E C33E 1.4583 . ?
 C26E C32E 1.3808 . ?
 C26E C34E 1.4589 . ?
 C27E C35E 1.4591 . ?
 C28E C31E 1.4588 . ?
 C28E C36E 1.3797 . ?
 C29E C36E 1.4593 . ?
 C29E C37E 1.4584 . ?
 C30E C38E 1.4605 . ?
 C31E C39E 1.3797 . ?
 C32E C40E 1.4588 . ?
 C33E C34E 1.4587 . ?
 C33E C41E 1.3790 . ?
 C34E C42E 1.3832 . ?
 C35E C37E 1.3798 . ?
 C35E C43E 1.4596 . ?
 C36E C44E 1.4599 . ?
 C37E C45E 1.4589 . ?
 C38E C40E 1.4599 . ?
 C38E C46E 1.3814 . ?
 C39E C46E 1.4582 . ?
 C39E C47E 1.4597 . ?
 C40E C48E 1.3795 . ?
 C41E C50E 1.4605 . ?
 C42E C48E 1.4614 . ?
 C42E C51E 1.4554 . ?
 C43E C52E 1.3823 . ?
 C44E C45E 1.4597 . ?
 C44E C47E 1.3794 . ?
 C45E C53E 1.3810 . ?
 C46E C54E 1.4583 . ?
 C47E C55E 1.4581 . ?
 C48E C56E 1.4586 . ?
 C49E C50E 1.4592 . ?
 C49E C57E 1.3804 . ?
 C50E C51E 1.3824 . ?
 C51E C58E 1.4570 . ?
 C52E C53E 1.4582 . ?
 C52E C57E 1.4597 . ?
 C53E C59E 1.4601 . ?
 C54E C55E 1.4584 . ?
 C54E C56E 1.3809 . ?
 C55E C59E 1.3786 . ?
 C56E C58E 1.4591 . ?
 C57E C60E 1.4589 . ?
 C58E C60E 1.3823 . ?
 C59E C60E 1.4589 . ?
 C1F C2F 1.4150 . ?
 C1F C6F 1.4133 . ?
 C1F C17F 1.4122 . ?
 C2F C3F 1.4116 . ?
 C2F C18F 1.4142 . ?
 C3F C4F 1.4590 . ?
 C3F C41F 1.4603 . ?
 C4F C5F 1.3800 . ?
 C4F C49F 1.4591 . ?
 C5F C6F 1.4591 . ?
 C5F C43F 1.4586 . ?
 C6F C27F 1.4586 . ?
 C7F C8F 1.4582 . ?
 C7F C9F 1.3810 . ?
 C7F C10F 1.4589 . ?
 C8F C11F 1.4126 . ?
 C8F C12F 1.4597 . ?
 C9F C13F 1.4602 . ?
 C9F C14F 1.4587 . ?
 C10F C15F 1.3810 . ?
 C10F C16F 1.4599 . ?
 C11F C17F 1.4151 . ?
 C11F C18F 1.4159 . ?
 C12F C16F 1.4605 . ?
 C12F C19F 1.3788 . ?
 C13F C17F 1.4128 . ?
 C13F C20F 1.4595 . ?
 C14F C21F 1.3809 . ?
 C14F C22F 1.4596 . ?
 C15F C21F 1.4562 . ?
 C15F C23F 1.4619 . ?
 C16F C24F 1.3814 . ?
 C18F C25F 1.4138 . ?
 C19F C25F 1.4583 . ?
 C19F C26F 1.4581 . ?
 C20F C22F 1.4583 . ?
 C20F C27F 1.3805 . ?
 C21F C28F 1.4607 . ?
 C22F C29F 1.3804 . ?
 C23F C30F 1.3802 . ?
 C23F C31F 1.4591 . ?
 C24F C30F 1.4582 . ?
 C24F C32F 1.4570 . ?
 C25F C33F 1.4579 . ?
 C26F C32F 1.3824 . ?
 C26F C34F 1.4583 . ?
 C27F C35F 1.4597 . ?
 C28F C31F 1.4595 . ?
 C28F C36F 1.3792 . ?
 C29F C36F 1.4590 . ?
 C29F C37F 1.4583 . ?
 C30F C38F 1.4606 . ?
 C31F C39F 1.3798 . ?
 C32F C40F 1.4588 . ?
 C33F C34F 1.4595 . ?
 C33F C41F 1.3794 . ?
 C34F C42F 1.3815 . ?
 C35F C37F 1.3793 . ?
 C35F C43F 1.4603 . ?
 C36F C44F 1.4603 . ?
 C37F C45F 1.4607 . ?
 C38F C40F 1.4606 . ?
 C38F C46F 1.3807 . ?
 C39F C46F 1.4589 . ?
 C39F C47F 1.4593 . ?
 C40F C48F 1.3795 . ?
 C41F C50F 1.4607 . ?
 C42F C48F 1.4610 . ?
 C42F C51F 1.4567 . ?
 C43F C52F 1.3820 . ?
 C44F C45F 1.4605 . ?
 C44F C47F 1.3786 . ?
 C45F C53F 1.3799 . ?
 C46F C54F 1.4582 . ?
 C47F C55F 1.4593 . ?
 C48F C56F 1.4592 . ?
 C49F C50F 1.4593 . ?
 C49F C57F 1.3804 . ?
 C50F C51F 1.3809 . ?
 C51F C58F 1.4574 . ?
 C52F C53F 1.4569 . ?
 C52F C57F 1.4594 . ?
 C53F C59F 1.4617 . ?
 C54F C55F 1.4612 . ?
 C54F C56F 1.3794 . ?
 C55F C59F 1.3770 . ?
 C56F C58F 1.4573 . ?
 C57F C60F 1.4590 . ?
 C58F C60F 1.3825 . ?
 C59F C60F 1.4584 . ?
 C1G C2G 1.4140 . ?
 C1G C6G 1.4128 . ?
 C1G C17G 1.4137 . ?
 C2G C3G 1.4131 . ?
 C2G C18G 1.4136 . ?
 C3G C4G 1.4587 . ?
 C3G C41G 1.4592 . ?
 C4G C5G 1.3794 . ?
 C4G C49G 1.4596 . ?
 C5G C6G 1.4589 . ?
 C5G C43G 1.4593 . ?
 C6G C27G 1.4596 . ?
 C7G C8G 1.4588 . ?
 C7G C9G 1.3811 . ?
 C7G C10G 1.4590 . ?
 C8G C11G 1.4120 . ?
 C8G C12G 1.4601 . ?
 C9G C13G 1.4606 . ?
 C9G C14G 1.4589 . ?
 C10G C15G 1.3806 . ?
 C10G C16G 1.4590 . ?
 C11G C17G 1.4135 . ?
 C11G C18G 1.4155 . ?
 C12G C16G 1.4592 . ?
 C12G C19G 1.3794 . ?
 C13G C17G 1.4129 . ?
 C13G C20G 1.4594 . ?
 C14G C21G 1.3801 . ?
 C14G C22G 1.4590 . ?
 C15G C21G 1.4585 . ?
 C15G C23G 1.4603 . ?
 C16G C24G 1.3816 . ?
 C18G C25G 1.4135 . ?
 C19G C25G 1.4583 . ?
 C19G C26G 1.4576 . ?
 C20G C22G 1.4587 . ?
 C20G C27G 1.3799 . ?
 C21G C28G 1.4616 . ?
 C22G C29G 1.3803 . ?
 C23G C30G 1.3815 . ?
 C23G C31G 1.4591 . ?
 C24G C30G 1.4584 . ?
 C24G C32G 1.4572 . ?
 C25G C33G 1.4584 . ?
 C26G C32G 1.3816 . ?
 C26G C34G 1.4573 . ?
 C27G C35G 1.4604 . ?
 C28G C31G 1.4587 . ?
 C28G C36G 1.3793 . ?
 C29G C36G 1.4597 . ?
 C29G C37G 1.4585 . ?
 C30G C38G 1.4611 . ?
 C31G C39G 1.3795 . ?
 C32G C40G 1.4585 . ?
 C33G C34G 1.4604 . ?
 C33G C41G 1.3788 . ?
 C34G C42G 1.3831 . ?
 C35G C37G 1.3793 . ?
 C35G C43G 1.4604 . ?
 C36G C44G 1.4589 . ?
 C37G C45G 1.4609 . ?
 C38G C40G 1.4597 . ?
 C38G C46G 1.3799 . ?
 C39G C46G 1.4581 . ?
 C39G C47G 1.4601 . ?
 C40G C48G 1.3804 . ?
 C41G C50G 1.4596 . ?
 C42G C48G 1.4608 . ?
 C42G C51G 1.4564 . ?
 C43G C52G 1.3816 . ?
 C44G C45G 1.4604 . ?
 C44G C47G 1.3790 . ?
 C45G C53G 1.3800 . ?
 C46G C54G 1.4587 . ?
 C47G C55G 1.4590 . ?
 C48G C56G 1.4588 . ?
 C49G C50G 1.4598 . ?
 C49G C57G 1.3798 . ?
 C50G C51G 1.3819 . ?
 C51G C58G 1.4569 . ?
 C52G C53G 1.4573 . ?
 C52G C57G 1.4600 . ?
 C53G C59G 1.4610 . ?
 C54G C55G 1.4608 . ?
 C54G C56G 1.3799 . ?
 C55G C59G 1.3776 . ?
 C56G C58G 1.4588 . ?
 C57G C60G 1.4599 . ?
 C58G C60G 1.3830 . ?
 C59G C60G 1.4585 . ?
 C1H C2H 1.4146 . ?
 C1H C6H 1.4124 . ?
 C1H C17H 1.4128 . ?
 C2H C3H 1.4115 . ?
 C2H C18H 1.4149 . ?
 C3H C4H 1.4589 . ?
 C3H C41H 1.4594 . ?
 C4H C5H 1.3798 . ?
 C4H C49H 1.4592 . ?
 C5H C6H 1.4589 . ?
 C5H C43H 1.4583 . ?
 C6H C27H 1.4592 . ?
 C7H C8H 1.4604 . ?
 C7H C9H 1.3792 . ?
 C7H C10H 1.4601 . ?
 C8H C11H 1.4119 . ?
 C8H C12H 1.4598 . ?
 C9H C13H 1.4599 . ?
 C9H C14H 1.4593 . ?
 C10H C15H 1.3800 . ?
 C10H C16H 1.4596 . ?
 C11H C17H 1.4140 . ?
 C11H C18H 1.4154 . ?
 C13H C17H 1.4131 . ?
 C13H C20H 1.4593 . ?
 C12H C16H 1.4583 . ?
 C12H C19H 1.3788 . ?
 C14H C21H 1.3813 . ?
 C14H C22H 1.4582 . ?
 C15H C21H 1.4580 . ?
 C15H C23H 1.4606 . ?
 C16H C24H 1.3814 . ?
 C18H C25H 1.4137 . ?
 C19H C25H 1.4593 . ?
 C19H C26H 1.4575 . ?
 C20H C22H 1.4588 . ?
 C20H C27H 1.3804 . ?
 C21H C28H 1.4606 . ?
 C22H C29H 1.3817 . ?
 C23H C30H 1.3820 . ?
 C23H C31H 1.4600 . ?
 C24H C30H 1.4581 . ?
 C24H C32H 1.4562 . ?
 C25H C33H 1.4583 . ?
 C26H C32H 1.3821 . ?
 C26H C34H 1.4585 . ?
 C27H C35H 1.4603 . ?
 C28H C31H 1.4592 . ?
 C28H C36H 1.3803 . ?
 C29H C36H 1.4581 . ?
 C29H C37H 1.4585 . ?
 C30H C38H 1.4601 . ?
 C31H C39H 1.3797 . ?
 C32H C40H 1.4578 . ?
 C33H C34H 1.4598 . ?
 C33H C41H 1.3786 . ?
 C34H C42H 1.3820 . ?
 C35H C37H 1.3797 . ?
 C35H C43H 1.4608 . ?
 C36H C44H 1.4597 . ?
 C37H C45H 1.4584 . ?
 C38H C40H 1.4613 . ?
 C38H C46H 1.3795 . ?
 C39H C46H 1.4578 . ?
 C39H C47H 1.4588 . ?
 C40H C48H 1.3803 . ?
 C41H C50H 1.4613 . ?
 C42H C48H 1.4609 . ?
 C42H C51H 1.4564 . ?
 C43H C52H 1.3818 . ?
 C44H C45H 1.4593 . ?
 C44H C47H 1.3791 . ?
 C45H C53H 1.3815 . ?
 C46H C54H 1.4599 . ?
 C47H C55H 1.4589 . ?
 C48H C56H 1.4586 . ?
 C49H C50H 1.4600 . ?
 C49H C57H 1.3810 . ?
 C50H C51H 1.3822 . ?
 C51H C58H 1.4567 . ?
 C52H C53H 1.4567 . ?
 C52H C57H 1.4594 . ?
 C53H C59H 1.4610 . ?
 C54H C55H 1.4601 . ?
 C54H C56H 1.3788 . ?
 C55H C59H 1.3775 . ?
 C56H C58H 1.4582 . ?
 C57H C60H 1.4597 . ?
 C58H C60H 1.3813 . ?
 C59H C60H 1.4588 . ?
 C10 C11 1.3900 . ?
 C10 C15 1.3900 . ?
 C10 C16 1.537(5) . ?
 C11 H11 0.9500 . ?
 C11 C12 1.3900 . ?
 C12 C13 1.3900 . ?
 C12 C17 1.535(5) . ?
 C13 H13 0.9500 . ?
 C13 C14 1.3900 . ?
 C14 C15 1.3900 . ?
 C14 C18 1.531(5) . ?
 C15 H15 0.9500 . ?
 C16 H16A 0.9800 . ?
 C16 H16B 0.9800 . ?
 C16 H16C 0.9800 . ?
 C17 H17A 0.9800 . ?
 C17 H17B 0.9800 . ?
 C17 H17C 0.9800 . ?
 C18 H18A 0.9800 . ?
 C18 H18B 0.9800 . ?
 C18 H18C 0.9800 . ?

loop_
  _geom_angle_atom_site_label_1
  _geom_angle_atom_site_label_2
  _geom_angle_atom_site_label_3
  _geom_angle
  _geom_angle_site_symmetry_1
  _geom_angle_site_symmetry_3
  _geom_angle_publ_flag
 N2A S1A N1A 101.4(5) . . ?
 C3A N1A S1A 105.4(6) . . ?
 C4A N2A S1A 103.6(7) . . ?
 C2A C1A C6A 120.0 . . ?
 C2A C1A C7 127.5(6) . . ?
 C6A C1A C7 112.5(6) . . ?
 C1A C2A H2A 120.0 . . ?
 C3A C2A C1A 120.0 . . ?
 C3A C2A H2A 120.0 . . ?
 N1A C3A C2A 126.7(6) . . ?
 N1A C3A C4A 113.3(6) . . ?
 C2A C3A C4A 120.0 . . ?
 N2A C4A C3A 116.3(6) . . ?
 N2A C4A C5A 123.7(6) . . ?
 C5A C4A C3A 120.0 . . ?
 C4A C5A H5A 120.0 . . ?
 C4A C5A C6A 120.0 . . ?
 C6A C5A H5A 120.0 . . ?
 C1A C6A C8 111.0(6) . . ?
 C5A C6A C1A 120.0 . . ?
 C5A C6A C8 128.9(6) . . ?
 N1B S1B N2B 102.8(7) . . ?
 N2B S1B C1B 68.2(5) . . ?
 C1B N1B S1B 101.8(9) . . ?
 C2B N2B S1B 104.9(9) . . ?
 N1B C1B C2B 118.2(7) . . ?
 N1B C1B C6B 121.8(7) . . ?
 C2B C1B S1B 74.7(4) . . ?
 C2B C1B C6B 120.0 . . ?
 C6B C1B S1B 165.3(4) . . ?
 N2B C2B C1B 112.2(6) . . ?
 N2B C2B C3B 127.8(6) . . ?
 C3B C2B C1B 120.0 . . ?
 C2B C3B H3B 120.0 . . ?
 C4B C3B C2B 120.0 . . ?
 C4B C3B H3B 120.0 . . ?
 C3B C4B C7 122.8(7) . . ?
 C5B C4B C3B 120.0 . . ?
 C5B C4B C7 117.1(7) . . ?
 C4B C5B C6B 120.0 . . ?
 C8 C5B C4B 113.3(7) . . ?
 C8 C5B C6B 126.7(7) . . ?
 C1B C6B H6B 120.0 . . ?
 C5B C6B C1B 120.0 . . ?
 C5B C6B H6B 120.0 . . ?
 C1A C7 C1A 110.3(4) 11_556 8_645 ?
 C1A C7 C1A 110.3(4) 8_645 . ?
 C1A C7 C1A 110.3(4) 11_556 . ?
 C1A C7 H7A 108.7 8_645 . ?
 C1A C7 H7A 108.7 11_556 . ?
 C1A C7 H7A 108.7 . . ?
 C4B C7 C1A 104.2(11) . 8_645 ?
 C4B C7 C1A 104.2(15) 8_645 11_556 ?
 C4B C7 C1A 105.5(15) 11_556 8_645 ?
 C4B C7 C1A 105.5(11) . 11_556 ?
 C4B C7 C4B 98.0(10) . 11_556 ?
 C4B C7 C4B 98.0(10) . 8_645 ?
 C4B C7 C4B 98.0(9) 11_556 8_645 ?
 C4B C7 H7B 119.4 . . ?
 C4B C7 H7B 119.4 11_556 . ?
 C4B C7 H7B 119.4 8_645 . ?
 C6A C8 C6A 103.5(8) 11_556 8_645 ?
 C6A C8 C6A 103.5(9) . 8_645 ?
 C6A C8 C6A 103.5(9) . 11_556 ?
 C6A C8 H8A 114.9 8_645 . ?
 C6A C8 H8A 114.9 . . ?
 C6A C8 H8A 114.9 11_556 . ?
 C5B C8 C6A 107.5(15) . 11_556 ?
 C5B C8 C6A 108(2) 11_556 8_645 ?
 C5B C8 C6A 104.0(15) . 8_645 ?
 C5B C8 C6A 104(2) 8_645 11_556 ?
 C5B C8 C5B 107.8(8) 11_556 8_645 ?
 C5B C8 C5B 107.8(10) . 8_645 ?
 C5B C8 C5B 107.9(10) . 11_556 ?
 C5B C8 H8B 111.0 . . ?
 C5B C8 H8B 111.0 8_645 . ?
 C5B C8 H8B 111.0 11_556 . ?
 C6C C1C C2C 120.0 . . ?
 C6C C1C C10C 120.0 . . ?
 C10C C1C C2C 107.9 . . ?
 C3C C2C C1C 119.6 . . ?
 C3C C2C C57C 119.8 . . ?
 C57C C2C C1C 108.0 . . ?
 C2C C3C C4C 120.4 . . ?
 C2C C3C C54C 120.3 . . ?
 C4C C3C C54C 108.0 . . ?
 C5C C4C C3C 120.3 . . ?
 C5C C4C C37C 120.3 . . ?
 C37C C4C C3C 108.0 . . ?
 C4C C5C C6C 119.7 . . ?
 C4C C5C C40C 119.7 . . ?
 C6C C5C C40C 108.0 . . ?
 C1C C6C C5C 120.0 . . ?
 C1C C6C C7C 120.0 . . ?
 C5C C6C C7C 108.0 . . ?
 C6C C7C C41C 108.0 . . ?
 C8C C7C C6C 120.0 . . ?
 C8C C7C C41C 120.0 . . ?
 C7C C8C C9C 120.1 . . ?
 C7C C8C C48C 119.9 . . ?
 C9C C8C C48C 108.1 . . ?
 C8C C9C C14C 107.9 . . ?
 C10C C9C C8C 120.0 . . ?
 C10C C9C C14C 120.0 . . ?
 C1C C10C C11C 108.1 . . ?
 C9C C10C C1C 120.0 . . ?
 C9C C10C C11C 120.0 . . ?
 C12C C11C C10C 119.9 . . ?
 C12C C11C C57C 120.0 . . ?
 C57C C11C C10C 108.0 . . ?
 C11C C12C C13C 120.1 . . ?
 C11C C12C C59C 119.9 . . ?
 C59C C12C C13C 108.1 . . ?
 C12C C13C C18C 107.9 . . ?
 C14C C13C C12C 120.0 . . ?
 C14C C13C C18C 120.0 . . ?
 C13C C14C C9C 120.0 . . ?
 C13C C14C C15C 119.9 . . ?
 C15C C14C C9C 108.1 . . ?
 C14C C15C C48C 108.0 . . ?
 C16C C15C C14C 120.1 . . ?
 C16C C15C C48C 120.0 . . ?
 C15C C16C C17C 120.1 . . ?
 C15C C16C C47C 120.0 . . ?
 C17C C16C C47C 107.8 . . ?
 C16C C17C C22C 108.1 . . ?
 C18C C17C C16C 120.0 . . ?
 C18C C17C C22C 120.0 . . ?
 C17C C18C C13C 120.0 . . ?
 C17C C18C C19C 120.1 . . ?
 C19C C18C C13C 108.0 . . ?
 C20C C19C C18C 119.9 . . ?
 C20C C19C C59C 120.1 . . ?
 C59C C19C C18C 108.0 . . ?
 C19C C20C C21C 120.1 . . ?
 C19C C20C C53C 119.9 . . ?
 C21C C20C C53C 107.9 . . ?
 C20C C21C C26C 108.0 . . ?
 C22C C21C C20C 120.0 . . ?
 C22C C21C C26C 120.0 . . ?
 C17C C22C C23C 108.0 . . ?
 C21C C22C C17C 119.9 . . ?
 C21C C22C C23C 120.0 . . ?
 C24C C23C C22C 120.0 . . ?
 C24C C23C C47C 120.1 . . ?
 C47C C23C C22C 107.9 . . ?
 C23C C24C C25C 120.0 . . ?
 C23C C24C C49C 120.0 . . ?
 C25C C24C C49C 107.9 . . ?
 C24C C25C C30C 108.0 . . ?
 C26C C25C C24C 120.0 . . ?
 C26C C25C C30C 120.0 . . ?
 C21C C26C C27C 108.0 . . ?
 C25C C26C C21C 120.0 . . ?
 C25C C26C C27C 120.0 . . ?
 C28C C27C C26C 120.0 . . ?
 C28C C27C C53C 120.0 . . ?
 C53C C27C C26C 108.1 . . ?
 C27C C28C C29C 120.0 . . ?
 C27C C28C C50C 119.9 . . ?
 C29C C28C C50C 108.0 . . ?
 C28C C29C C34C 108.0 . . ?
 C30C C29C C28C 120.0 . . ?
 C30C C29C C34C 120.0 . . ?
 C25C C30C C31C 108.0 . . ?
 C29C C30C C25C 120.0 . . ?
 C29C C30C C31C 120.0 . . ?
 C32C C31C C30C 120.0 . . ?
 C32C C31C C49C 120.0 . . ?
 C49C C31C C30C 108.0 . . ?
 C31C C32C C33C 120.0 . . ?
 C31C C32C C60C 119.9 . . ?
 C33C C32C C60C 108.1 . . ?
 C32C C33C C38C 108.0 . . ?
 C34C C33C C32C 120.1 . . ?
 C34C C33C C38C 120.0 . . ?
 C33C C34C C29C 120.0 . . ?
 C33C C34C C35C 120.1 . . ?
 C35C C34C C29C 108.0 . . ?
 C36C C35C C34C 119.6 . . ?
 C36C C35C C50C 119.8 . . ?
 C50C C35C C34C 108.0 . . ?
 C35C C36C C37C 120.4 . . ?
 C35C C36C C54C 120.2 . . ?
 C37C C36C C54C 108.0 . . ?
 C4C C37C C36C 108.1 . . ?
 C38C C37C C4C 120.3 . . ?
 C38C C37C C36C 120.2 . . ?
 C37C C38C C33C 119.7 . . ?
 C37C C38C C39C 119.7 . . ?
 C39C C38C C33C 108.0 . . ?
 C40C C39C C38C 120.0 . . ?
 C40C C39C C60C 119.9 . . ?
 C60C C39C C38C 108.0 . . ?
 C39C C40C C5C 120.0 . . ?
 C39C C40C C41C 120.1 . . ?
 C41C C40C C5C 107.9 . . ?
 C40C C41C C7C 108.1 . . ?
 C42C C41C C7C 120.0 . . ?
 C42C C41C C40C 120.0 . . ?
 C41C C42C C43C 120.0 . . ?
 C41C C42C C46C 119.9 . . ?
 C43C C42C C46C 108.0 . . ?
 C42C C43C C44C 108.1 . . ?
 C48C C43C C42C 120.0 . . ?
 C48C C43C C44C 119.9 . . ?
 C45C C44C C43C 107.9 . . ?
 C47C C44C C43C 120.1 . . ?
 C47C C44C C45C 119.9 . . ?
 C44C C45C C46C 108.1 . . ?
 C49C C45C C44C 120.1 . . ?
 C49C C45C C46C 119.9 . . ?
 C42C C46C C45C 107.9 . . ?
 C60C C46C C42C 120.0 . . ?
 C60C C46C C45C 120.0 . . ?
 C23C C47C C16C 108.1 . . ?
 C44C C47C C16C 119.9 . . ?
 C44C C47C C23C 120.0 . . ?
 C15C C48C C8C 107.9 . . ?
 C43C C48C C8C 120.0 . . ?
 C43C C48C C15C 120.1 . . ?
 C31C C49C C24C 108.0 . . ?
 C45C C49C C24C 119.9 . . ?
 C45C C49C C31C 120.2 . . ?
 C35C C50C C28C 108.0 . . ?
 C51C C50C C28C 120.0 . . ?
 C51C C50C C35C 120.0 . . ?
 C50C C51C C52C 120.0 . . ?
 C50C C51C C55C 120.1 . . ?
 C55C C51C C52C 108.0 . . ?
 C53C C52C C51C 120.1 . . ?
 C53C C52C C68C 120.1 . . ?
 C68C C52C C51C 108.0 . . ?
 C27C C53C C20C 108.0 . . ?
 C52C C53C C20C 119.9 . . ?
 C52C C53C C27C 120.0 . . ?
 C36C C54C C3C 108.0 . . ?
 C55C C54C C3C 120.3 . . ?
 C55C C54C C36C 120.4 . . ?
 C51C C55C C56C 108.0 . . ?
 C54C C55C C51C 119.6 . . ?
 C54C C55C C56C 119.7 . . ?
 C55C C56C C68C 108.0 . . ?
 C57C C56C C55C 120.1 . . ?
 C57C C56C C68C 120.0 . . ?
 C11C C57C C2C 108.1 . . ?
 C56C C57C C2C 119.9 . . ?
 C56C C57C C11C 120.0 . . ?
 C52C C68C C56C 108.0 . . ?
 C59C C68C C52C 120.0 . . ?
 C59C C68C C56C 119.9 . . ?
 C12C C59C C19C 108.1 . . ?
 C68C C59C C12C 120.1 . . ?
 C68C C59C C19C 119.9 . . ?
 C32C C60C C39C 107.9 . . ?
 C46C C60C C32C 120.1 . . ?
 C46C C60C C39C 120.0 . . ?
 C2D C1D C10D 108.0 . . ?
 C6D C1D C2D 120.0 . . ?
 C6D C1D C10D 120.0 . . ?
 C1D C2D C57D 108.0 . . ?
 C3D C2D C1D 119.7 . . ?
 C3D C2D C57D 119.7 . . ?
 C2D C3D C4D 120.3 . . ?
 C2D C3D C54D 120.3 . . ?
 C54D C3D C4D 108.0 . . ?
 C5D C4D C3D 120.3 . . ?
 C5D C4D C37D 120.3 . . ?
 C37D C4D C3D 108.0 . . ?
 C4D C5D C6D 119.6 . . ?
 C4D C5D C40D 119.7 . . ?
 C40D C5D C6D 108.0 . . ?
 C1D C6D C5D 120.0 . . ?
 C1D C6D C7D 120.0 . . ?
 C5D C6D C7D 107.9 . . ?
 C8D C7D C6D 120.0 . . ?
 C8D C7D C41D 120.0 . . ?
 C41D C7D C6D 108.0 . . ?
 C7D C8D C9D 120.1 . . ?
 C7D C8D C48D 120.1 . . ?
 C48D C8D C9D 108.0 . . ?
 C10D C9D C8D 119.9 . . ?
 C10D C9D C14D 120.0 . . ?
 C14D C9D C8D 108.0 . . ?
 C9D C10D C1D 120.1 . . ?
 C9D C10D C11D 120.0 . . ?
 C11D C10D C1D 107.9 . . ?
 C12D C11D C10D 120.0 . . ?
 C12D C11D C57D 119.9 . . ?
 C57D C11D C10D 108.1 . . ?
 C11D C12D C13D 120.0 . . ?
 C11D C12D C59D 120.0 . . ?
 C59D C12D C13D 108.0 . . ?
 C14D C13D C12D 119.9 . . ?
 C14D C13D C18D 120.0 . . ?
 C18D C13D C12D 108.0 . . ?
 C9D C14D C15D 108.0 . . ?
 C13D C14D C9D 120.1 . . ?
 C13D C14D C15D 119.9 . . ?
 C16D C15D C14D 120.0 . . ?
 C16D C15D C48D 120.0 . . ?
 C48D C15D C14D 108.0 . . ?
 C15D C16D C17D 120.0 . . ?
 C15D C16D C47D 120.0 . . ?
 C47D C16D C17D 108.0 . . ?
 C16D C17D C22D 108.0 . . ?
 C18D C17D C16D 120.0 . . ?
 C18D C17D C22D 119.9 . . ?
 C17D C18D C13D 120.0 . . ?
 C17D C18D C19D 120.1 . . ?
 C19D C18D C13D 107.9 . . ?
 C18D C19D C59D 108.1 . . ?
 C20D C19D C18D 119.9 . . ?
 C20D C19D C59D 119.9 . . ?
 C19D C20D C21D 120.1 . . ?
 C19D C20D C53D 119.9 . . ?
 C21D C20D C53D 108.0 . . ?
 C22D C21D C20D 119.8 . . ?
 C22D C21D C26D 120.2 . . ?
 C26D C21D C20D 108.0 . . ?
 C21D C22D C17D 120.1 . . ?
 C21D C22D C23D 119.9 . . ?
 C23D C22D C17D 107.9 . . ?
 C22D C23D C47D 108.0 . . ?
 C24D C23D C22D 120.0 . . ?
 C24D C23D C47D 120.0 . . ?
 C23D C24D C25D 120.0 . . ?
 C23D C24D C49D 120.0 . . ?
 C25D C24D C49D 108.1 . . ?
 C24D C25D C30D 108.0 . . ?
 C26D C25D C24D 120.1 . . ?
 C26D C25D C30D 119.8 . . ?
 C25D C26D C21D 119.8 . . ?
 C25D C26D C27D 120.1 . . ?
 C27D C26D C21D 108.1 . . ?
 C26D C27D C53D 108.1 . . ?
 C28D C27D C26D 120.1 . . ?
 C28D C27D C53D 119.8 . . ?
 C27D C28D C29D 119.9 . . ?
 C27D C28D C50D 120.2 . . ?
 C50D C28D C29D 108.0 . . ?
 C30D C29D C28D 120.0 . . ?
 C30D C29D C34D 119.9 . . ?
 C34D C29D C28D 108.0 . . ?
 C29D C30D C25D 120.1 . . ?
 C29D C30D C31D 120.0 . . ?
 C31D C30D C25D 107.9 . . ?
 C32D C31D C30D 120.0 . . ?
 C32D C31D C49D 120.1 . . ?
 C49D C31D C30D 108.1 . . ?
 C31D C32D C33D 120.0 . . ?
 C31D C32D C60D 119.9 . . ?
 C60D C32D C33D 108.1 . . ?
 C34D C33D C32D 119.9 . . ?
 C34D C33D C38D 120.1 . . ?
 C38D C33D C32D 107.9 . . ?
 C29D C34D C35D 107.9 . . ?
 C33D C34D C29D 120.1 . . ?
 C33D C34D C35D 119.9 . . ?
 C36D C35D C34D 119.7 . . ?
 C36D C35D C50D 119.8 . . ?
 C50D C35D C34D 108.0 . . ?
 C35D C36D C37D 120.4 . . ?
 C35D C36D C54D 120.3 . . ?
 C37D C36D C54D 107.9 . . ?
 C36D C37D C4D 108.0 . . ?
 C38D C37D C4D 120.2 . . ?
 C38D C37D C36D 120.2 . . ?
 C37D C38D C33D 119.7 . . ?
 C37D C38D C39D 119.7 . . ?
 C39D C38D C33D 108.1 . . ?
 C38D C39D C60D 108.0 . . ?
 C40D C39D C38D 120.0 . . ?
 C40D C39D C60D 120.0 . . ?
 C5D C40D C41D 108.0 . . ?
 C39D C40D C5D 120.0 . . ?
 C39D C40D C41D 120.0 . . ?
 C7D C41D C40D 108.0 . . ?
 C42D C41D C7D 120.0 . . ?
 C42D C41D C40D 120.0 . . ?
 C41D C42D C43D 120.0 . . ?
 C41D C42D C46D 120.0 . . ?
 C43D C42D C46D 108.1 . . ?
 C42D C43D C44D 108.0 . . ?
 C48D C43D C42D 120.1 . . ?
 C48D C43D C44D 120.0 . . ?
 C43D C44D C45D 108.0 . . ?
 C47D C44D C43D 120.0 . . ?
 C47D C44D C45D 120.1 . . ?
 C46D C45D C44D 108.0 . . ?
 C49D C45D C44D 120.0 . . ?
 C49D C45D C46D 120.0 . . ?
 C45D C46D C42D 108.0 . . ?
 C60D C46D C42D 120.0 . . ?
 C60D C46D C45D 120.0 . . ?
 C16D C47D C23D 108.1 . . ?
 C44D C47D C16D 120.0 . . ?
 C44D C47D C23D 120.0 . . ?
 C15D C48D C8D 108.0 . . ?
 C43D C48D C8D 119.9 . . ?
 C43D C48D C15D 120.1 . . ?
 C31D C49D C24D 107.9 . . ?
 C45D C49D C24D 120.0 . . ?
 C45D C49D C31D 120.0 . . ?
 C35D C50D C28D 108.1 . . ?
 C51D C50D C28D 119.9 . . ?
 C51D C50D C35D 120.0 . . ?
 C50D C51D C52D 120.1 . . ?
 C50D C51D C55D 120.0 . . ?
 C52D C51D C55D 108.0 . . ?
 C51D C52D C58D 108.0 . . ?
 C53D C52D C51D 120.0 . . ?
 C53D C52D C58D 120.0 . . ?
 C27D C53D C20D 107.9 . . ?
 C52D C53D C20D 120.1 . . ?
 C52D C53D C27D 120.0 . . ?
 C3D C54D C36D 108.1 . . ?
 C55D C54D C3D 120.4 . . ?
 C55D C54D C36D 120.1 . . ?
 C51D C55D C56D 108.0 . . ?
 C54D C55D C51D 119.7 . . ?
 C54D C55D C56D 119.6 . . ?
 C57D C56D C55D 120.1 . . ?
 C57D C56D C58D 120.0 . . ?
 C58D C56D C55D 108.0 . . ?
 C11D C57D C2D 108.0 . . ?
 C56D C57D C2D 120.0 . . ?
 C56D C57D C11D 120.1 . . ?
 C56D C58D C52D 108.0 . . ?
 C59D C58D C52D 120.0 . . ?
 C59D C58D C56D 120.0 . . ?
 C12D C59D C19D 107.9 . . ?
 C58D C59D C12D 120.0 . . ?
 C58D C59D C19D 120.1 . . ?
 C32D C60D C39D 107.9 . . ?
 C46D C60D C32D 120.0 . . ?
 C46D C60D C39D 120.0 . . ?
 C2E C1E C17E 108.1 . . ?
 C6E C1E C2E 120.3 . . ?
 C6E C1E C17E 120.3 . . ?
 C1E C2E C18E 107.9 . . ?
 C3E C2E C1E 120.3 . . ?
 C3E C2E C18E 120.2 . . ?
 C2E C3E C4E 119.7 . . ?
 C2E C3E C41E 119.7 . . ?
 C4E C3E C41E 108.0 . . ?
 C3E C4E C49E 108.1 . . ?
 C5E C4E C3E 120.0 . . ?
 C5E C4E C49E 120.0 . . ?
 C4E C5E C6E 120.0 . . ?
 C4E C5E C43E 120.0 . . ?
 C43E C5E C6E 108.0 . . ?
 C1E C6E C5E 119.6 . . ?
 C1E C6E C27E 119.7 . . ?
 C27E C6E C5E 108.0 . . ?
 C8E C7E C10E 108.0 . . ?
 C9E C7E C8E 120.1 . . ?
 C9E C7E C10E 119.9 . . ?
 C7E C8E C12E 108.0 . . ?
 C11E C8E C7E 119.6 . . ?
 C11E C8E C12E 119.7 . . ?
 C7E C9E C13E 120.0 . . ?
 C7E C9E C14E 120.1 . . ?
 C14E C9E C13E 108.0 . . ?
 C15E C10E C7E 120.0 . . ?
 C15E C10E C16E 120.1 . . ?
 C16E C10E C7E 108.0 . . ?
 C8E C11E C17E 120.4 . . ?
 C8E C11E C18E 120.3 . . ?
 C17E C11E C18E 108.0 . . ?
 C16E C12E C8E 108.0 . . ?
 C19E C12E C8E 119.9 . . ?
 C19E C12E C16E 120.0 . . ?
 C9E C13E C20E 108.0 . . ?
 C17E C13E C9E 119.7 . . ?
 C17E C13E C20E 119.7 . . ?
 C21E C14E C9E 119.9 . . ?
 C21E C14E C22E 120.1 . . ?
 C22E C14E C9E 108.0 . . ?
 C10E C15E C21E 120.0 . . ?
 C10E C15E C23E 120.0 . . ?
 C21E C15E C23E 107.9 . . ?
 C12E C16E C10E 108.0 . . ?
 C24E C16E C10E 119.9 . . ?
 C24E C16E C12E 120.0 . . ?
 C11E C17E C1E 108.0 . . ?
 C13E C17E C1E 120.3 . . ?
 C13E C17E C11E 120.3 . . ?
 C11E C18E C2E 108.0 . . ?
 C25E C18E C2E 120.3 . . ?
 C25E C18E C11E 120.3 . . ?
 C12E C19E C25E 120.1 . . ?
 C12E C19E C26E 120.0 . . ?
 C26E C19E C25E 108.0 . . ?
 C22E C20E C13E 107.9 . . ?
 C27E C20E C13E 119.9 . . ?
 C27E C20E C22E 120.2 . . ?
 C14E C21E C15E 120.0 . . ?
 C14E C21E C28E 119.9 . . ?
 C15E C21E C28E 108.1 . . ?
 C14E C22E C20E 108.1 . . ?
 C29E C22E C14E 120.0 . . ?
 C29E C22E C20E 119.8 . . ?
 C30E C23E C15E 119.9 . . ?
 C30E C23E C31E 120.0 . . ?
 C31E C23E C15E 108.1 . . ?
 C16E C24E C30E 120.0 . . ?
 C16E C24E C32E 120.0 . . ?
 C32E C24E C30E 108.1 . . ?
 C18E C25E C19E 119.6 . . ?
 C18E C25E C33E 119.6 . . ?
 C33E C25E C19E 108.0 . . ?
 C19E C26E C34E 108.0 . . ?
 C32E C26E C19E 120.0 . . ?
 C32E C26E C34E 120.0 . . ?
 C6E C27E C35E 108.1 . . ?
 C20E C27E C6E 120.1 . . ?
 C20E C27E C35E 119.8 . . ?
 C31E C28E C21E 108.0 . . ?
 C36E C28E C21E 120.0 . . ?
 C36E C28E C31E 120.1 . . ?
 C22E C29E C36E 119.9 . . ?
 C22E C29E C37E 120.0 . . ?
 C37E C29E C36E 108.1 . . ?
 C23E C30E C24E 120.1 . . ?
 C23E C30E C38E 120.0 . . ?
 C24E C30E C38E 107.9 . . ?
 C28E C31E C23E 108.0 . . ?
 C39E C31E C23E 120.1 . . ?
 C39E C31E C28E 120.0 . . ?
 C24E C32E C40E 108.1 . . ?
 C26E C32E C24E 120.0 . . ?
 C26E C32E C40E 120.0 . . ?
 C25E C33E C34E 107.9 . . ?
 C41E C33E C25E 120.1 . . ?
 C41E C33E C34E 120.0 . . ?
 C33E C34E C26E 108.1 . . ?
 C42E C34E C26E 120.1 . . ?
 C42E C34E C33E 120.0 . . ?
 C27E C35E C43E 107.9 . . ?
 C37E C35E C27E 120.1 . . ?
 C37E C35E C43E 120.0 . . ?
 C28E C36E C29E 120.1 . . ?
 C28E C36E C44E 119.9 . . ?
 C29E C36E C44E 108.0 . . ?
 C29E C37E C45E 107.9 . . ?
 C35E C37E C29E 120.0 . . ?
 C35E C37E C45E 120.1 . . ?
 C40E C38E C30E 108.0 . . ?
 C46E C38E C30E 119.9 . . ?
 C46E C38E C40E 120.0 . . ?
 C31E C39E C46E 120.0 . . ?
 C31E C39E C47E 120.0 . . ?
 C46E C39E C47E 107.9 . . ?
 C32E C40E C38E 107.9 . . ?
 C48E C40E C32E 120.2 . . ?
 C48E C40E C38E 119.9 . . ?
 C3E C41E C50E 107.9 . . ?
 C33E C41E C3E 120.0 . . ?
 C33E C41E C50E 120.0 . . ?
 C34E C42E C48E 119.9 . . ?
 C34E C42E C51E 120.0 . . ?
 C51E C42E C48E 108.0 . . ?
 C5E C43E C35E 108.1 . . ?
 C52E C43E C5E 120.0 . . ?
 C52E C43E C35E 119.9 . . ?
 C45E C44E C36E 107.9 . . ?
 C47E C44E C36E 120.1 . . ?
 C47E C44E C45E 119.9 . . ?
 C37E C45E C44E 108.1 . . ?
 C53E C45E C37E 119.9 . . ?
 C53E C45E C44E 120.0 . . ?
 C38E C46E C39E 120.0 . . ?
 C38E C46E C54E 120.0 . . ?
 C39E C46E C54E 108.0 . . ?
 C44E C47E C39E 119.9 . . ?
 C44E C47E C55E 120.1 . . ?
 C55E C47E C39E 108.0 . . ?
 C40E C48E C42E 119.9 . . ?
 C40E C48E C56E 120.1 . . ?
 C56E C48E C42E 107.9 . . ?
 C50E C49E C4E 107.9 . . ?
 C57E C49E C4E 120.0 . . ?
 C57E C49E C50E 120.0 . . ?
 C49E C50E C41E 108.0 . . ?
 C51E C50E C41E 119.9 . . ?
 C51E C50E C49E 120.0 . . ?
 C42E C51E C58E 108.1 . . ?
 C50E C51E C42E 120.1 . . ?
 C50E C51E C58E 120.0 . . ?
 C43E C52E C53E 119.9 . . ?
 C43E C52E C57E 120.0 . . ?
 C53E C52E C57E 108.0 . . ?
 C45E C53E C52E 120.1 . . ?
 C45E C53E C59E 119.9 . . ?
 C52E C53E C59E 108.1 . . ?
 C46E C54E C55E 108.0 . . ?
 C56E C54E C46E 119.9 . . ?
 C56E C54E C55E 120.0 . . ?
 C47E C55E C54E 108.0 . . ?
 C59E C55E C47E 120.0 . . ?
 C59E C55E C54E 120.0 . . ?
 C48E C56E C58E 108.0 . . ?
 C54E C56E C48E 120.0 . . ?
 C54E C56E C58E 120.1 . . ?
 C49E C57E C52E 120.0 . . ?
 C49E C57E C60E 120.1 . . ?
 C60E C57E C52E 108.0 . . ?
 C51E C58E C56E 108.0 . . ?
 C60E C58E C51E 120.1 . . ?
 C60E C58E C56E 119.8 . . ?
 C55E C59E C53E 120.1 . . ?
 C55E C59E C60E 120.0 . . ?
 C60E C59E C53E 107.9 . . ?
 C58E C60E C57E 119.9 . . ?
 C58E C60E C59E 120.1 . . ?
 C59E C60E C57E 108.0 . . ?
 C6F C1F C2F 120.2 . . ?
 C17F C1F C2F 108.1 . . ?
 C17F C1F C6F 120.4 . . ?
 C3F C2F C1F 120.3 . . ?
 C3F C2F C18F 120.2 . . ?
 C18F C2F C1F 108.0 . . ?
 C2F C3F C4F 119.8 . . ?
 C2F C3F C41F 119.7 . . ?
 C4F C3F C41F 108.0 . . ?
 C3F C4F C49F 108.1 . . ?
 C5F C4F C3F 119.9 . . ?
 C5F C4F C49F 120.0 . . ?
 C4F C5F C6F 120.1 . . ?
 C4F C5F C43F 120.0 . . ?
 C43F C5F C6F 108.0 . . ?
 C1F C6F C5F 119.7 . . ?
 C1F C6F C27F 119.6 . . ?
 C27F C6F C5F 108.0 . . ?
 C8F C7F C10F 108.0 . . ?
 C9F C7F C8F 120.1 . . ?
 C9F C7F C10F 119.9 . . ?
 C7F C8F C12F 108.1 . . ?
 C11F C8F C7F 119.7 . . ?
 C11F C8F C12F 119.7 . . ?
 C7F C9F C13F 119.9 . . ?
 C7F C9F C14F 120.0 . . ?
 C14F C9F C13F 108.0 . . ?
 C7F C10F C16F 108.0 . . ?
 C15F C10F C7F 120.0 . . ?
 C15F C10F C16F 120.0 . . ?
 C8F C11F C17F 120.4 . . ?
 C8F C11F C18F 120.3 . . ?
 C17F C11F C18F 108.0 . . ?
 C8F C12F C16F 107.9 . . ?
 C19F C12F C8F 120.1 . . ?
 C19F C12F C16F 120.0 . . ?
 C17F C13F C9F 119.8 . . ?
 C17F C13F C20F 119.7 . . ?
 C20F C13F C9F 108.0 . . ?
 C9F C14F C22F 108.0 . . ?
 C21F C14F C9F 119.9 . . ?
 C21F C14F C22F 120.1 . . ?
 C10F C15F C21F 120.0 . . ?
 C10F C15F C23F 119.9 . . ?
 C21F C15F C23F 107.9 . . ?
 C10F C16F C12F 108.0 . . ?
 C24F C16F C10F 120.0 . . ?
 C24F C16F C12F 120.0 . . ?
 C1F C17F C11F 108.0 . . ?
 C1F C17F C13F 120.3 . . ?
 C13F C17F C11F 120.2 . . ?
 C2F C18F C11F 107.9 . . ?
 C25F C18F C2F 120.4 . . ?
 C25F C18F C11F 120.2 . . ?
 C12F C19F C25F 120.0 . . ?
 C12F C19F C26F 120.1 . . ?
 C26F C19F C25F 108.0 . . ?
 C22F C20F C13F 108.0 . . ?
 C27F C20F C13F 119.9 . . ?
 C27F C20F C22F 120.1 . . ?
 C14F C21F C15F 120.1 . . ?
 C14F C21F C28F 119.8 . . ?
 C15F C21F C28F 108.2 . . ?
 C20F C22F C14F 108.1 . . ?
 C29F C22F C14F 120.0 . . ?
 C29F C22F C20F 120.0 . . ?
 C30F C23F C15F 120.0 . . ?
 C30F C23F C31F 120.0 . . ?
 C31F C23F C15F 108.0 . . ?
 C16F C24F C30F 120.0 . . ?
 C16F C24F C32F 120.0 . . ?
 C32F C24F C30F 108.1 . . ?
 C18F C25F C19F 119.7 . . ?
 C18F C25F C33F 119.5 . . ?
 C33F C25F C19F 108.1 . . ?
 C19F C26F C34F 108.0 . . ?
 C32F C26F C19F 120.0 . . ?
 C32F C26F C34F 120.0 . . ?
 C6F C27F C35F 108.1 . . ?
 C20F C27F C6F 120.1 . . ?
 C20F C27F C35F 119.8 . . ?
 C31F C28F C21F 107.9 . . ?
 C36F C28F C21F 120.1 . . ?
 C36F C28F C31F 120.1 . . ?
 C22F C29F C36F 120.0 . . ?
 C22F C29F C37F 120.0 . . ?
 C37F C29F C36F 108.1 . . ?
 C23F C30F C24F 120.0 . . ?
 C23F C30F C38F 120.0 . . ?
 C24F C30F C38F 108.0 . . ?
 C23F C31F C28F 108.0 . . ?
 C39F C31F C23F 120.0 . . ?
 C39F C31F C28F 119.9 . . ?
 C24F C32F C40F 108.1 . . ?
 C26F C32F C24F 120.0 . . ?
 C26F C32F C40F 119.9 . . ?
 C25F C33F C34F 107.9 . . ?
 C41F C33F C25F 120.1 . . ?
 C41F C33F C34F 119.9 . . ?
 C26F C34F C33F 108.0 . . ?
 C42F C34F C26F 120.1 . . ?
 C42F C34F C33F 120.0 . . ?
 C27F C35F C43F 107.9 . . ?
 C37F C35F C27F 120.1 . . ?
 C37F C35F C43F 120.1 . . ?
 C28F C36F C29F 120.0 . . ?
 C28F C36F C44F 119.8 . . ?
 C29F C36F C44F 108.0 . . ?
 C29F C37F C45F 108.0 . . ?
 C35F C37F C29F 120.0 . . ?
 C35F C37F C45F 119.9 . . ?
 C30F C38F C40F 108.0 . . ?
 C46F C38F C30F 120.0 . . ?
 C46F C38F C40F 120.0 . . ?
 C31F C39F C46F 120.0 . . ?
 C31F C39F C47F 120.0 . . ?
 C46F C39F C47F 107.9 . . ?
 C32F C40F C38F 107.9 . . ?
 C48F C40F C32F 120.2 . . ?
 C48F C40F C38F 119.9 . . ?
 C3F C41F C50F 108.0 . . ?
 C33F C41F C3F 120.0 . . ?
 C33F C41F C50F 120.1 . . ?
 C34F C42F C48F 119.9 . . ?
 C34F C42F C51F 120.0 . . ?
 C51F C42F C48F 108.0 . . ?
 C5F C43F C35F 108.1 . . ?
 C52F C43F C5F 120.0 . . ?
 C52F C43F C35F 119.9 . . ?
 C36F C44F C45F 107.9 . . ?
 C47F C44F C36F 120.1 . . ?
 C47F C44F C45F 120.0 . . ?
 C44F C45F C37F 108.0 . . ?
 C53F C45F C37F 119.9 . . ?
 C53F C45F C44F 120.1 . . ?
 C38F C46F C39F 120.0 . . ?
 C38F C46F C54F 120.0 . . ?
 C54F C46F C39F 108.1 . . ?
 C39F C47F C55F 108.1 . . ?
 C44F C47F C39F 120.0 . . ?
 C44F C47F C55F 120.0 . . ?
 C40F C48F C42F 119.9 . . ?
 C40F C48F C56F 120.1 . . ?
 C56F C48F C42F 107.9 . . ?
 C4F C49F C50F 108.0 . . ?
 C57F C49F C4F 120.0 . . ?
 C57F C49F C50F 119.9 . . ?
 C49F C50F C41F 108.0 . . ?
 C51F C50F C41F 119.9 . . ?
 C51F C50F C49F 120.0 . . ?
 C42F C51F C58F 108.0 . . ?
 C50F C51F C42F 120.1 . . ?
 C50F C51F C58F 120.1 . . ?
 C43F C52F C53F 119.9 . . ?
 C43F C52F C57F 120.0 . . ?
 C53F C52F C57F 108.0 . . ?
 C45F C53F C52F 120.2 . . ?
 C45F C53F C59F 119.8 . . ?
 C52F C53F C59F 108.0 . . ?
 C46F C54F C55F 108.0 . . ?
 C56F C54F C46F 120.0 . . ?
 C56F C54F C55F 120.0 . . ?
 C47F C55F C54F 107.9 . . ?
 C59F C55F C47F 120.1 . . ?
 C59F C55F C54F 120.0 . . ?
 C54F C56F C48F 120.0 . . ?
 C54F C56F C58F 120.1 . . ?
 C58F C56F C48F 108.0 . . ?
 C49F C57F C52F 120.0 . . ?
 C49F C57F C60F 120.1 . . ?
 C60F C57F C52F 108.0 . . ?
 C56F C58F C51F 108.1 . . ?
 C60F C58F C51F 120.0 . . ?
 C60F C58F C56F 119.9 . . ?
 C55F C59F C53F 120.1 . . ?
 C55F C59F C60F 120.1 . . ?
 C60F C59F C53F 107.9 . . ?
 C58F C60F C57F 119.9 . . ?
 C58F C60F C59F 120.0 . . ?
 C59F C60F C57F 108.1 . . ?
 C6G C1G C2G 120.3 . . ?
 C6G C1G C17G 120.4 . . ?
 C17G C1G C2G 108.0 . . ?
 C3G C2G C1G 120.3 . . ?
 C3G C2G C18G 120.2 . . ?
 C18G C2G C1G 108.0 . . ?
 C2G C3G C4G 119.7 . . ?
 C2G C3G C41G 119.7 . . ?
 C4G C3G C41G 108.0 . . ?
 C3G C4G C49G 108.1 . . ?
 C5G C4G C3G 120.0 . . ?
 C5G C4G C49G 120.0 . . ?
 C4G C5G C6G 120.1 . . ?
 C4G C5G C43G 120.0 . . ?
 C6G C5G C43G 108.0 . . ?
 C1G C6G C5G 119.6 . . ?
 C1G C6G C27G 119.6 . . ?
 C5G C6G C27G 108.0 . . ?
 C8G C7G C10G 108.0 . . ?
 C9G C7G C8G 120.1 . . ?
 C9G C7G C10G 119.9 . . ?
 C7G C8G C12G 108.0 . . ?
 C11G C8G C7G 119.7 . . ?
 C11G C8G C12G 119.7 . . ?
 C7G C9G C13G 119.9 . . ?
 C7G C9G C14G 120.1 . . ?
 C14G C9G C13G 108.0 . . ?
 C15G C10G C7G 120.0 . . ?
 C15G C10G C16G 120.0 . . ?
 C16G C10G C7G 108.0 . . ?
 C8G C11G C17G 120.4 . . ?
 C8G C11G C18G 120.2 . . ?
 C17G C11G C18G 108.0 . . ?
 C16G C12G C8G 107.9 . . ?
 C19G C12G C8G 120.0 . . ?
 C19G C12G C16G 120.0 . . ?
 C17G C13G C9G 119.7 . . ?
 C17G C13G C20G 119.7 . . ?
 C20G C13G C9G 108.0 . . ?
 C9G C14G C22G 108.0 . . ?
 C21G C14G C9G 119.9 . . ?
 C21G C14G C22G 120.0 . . ?
 C10G C15G C21G 120.0 . . ?
 C10G C15G C23G 120.0 . . ?
 C21G C15G C23G 107.9 . . ?
 C10G C16G C12G 108.0 . . ?
 C24G C16G C10G 119.9 . . ?
 C24G C16G C12G 119.9 . . ?
 C11G C17G C1G 108.0 . . ?
 C13G C17G C1G 120.3 . . ?
 C13G C17G C11G 120.3 . . ?
 C2G C18G C11G 107.9 . . ?
 C25G C18G C2G 120.4 . . ?
 C25G C18G C11G 120.3 . . ?
 C12G C19G C25G 120.0 . . ?
 C12G C19G C26G 120.0 . . ?
 C26G C19G C25G 108.0 . . ?
 C22G C20G C13G 108.0 . . ?
 C27G C20G C13G 120.0 . . ?
 C27G C20G C22G 120.1 . . ?
 C14G C21G C15G 120.1 . . ?
 C14G C21G C28G 120.0 . . ?
 C15G C21G C28G 108.1 . . ?
 C20G C22G C14G 108.0 . . ?
 C29G C22G C14G 120.0 . . ?
 C29G C22G C20G 120.0 . . ?
 C30G C23G C15G 119.9 . . ?
 C30G C23G C31G 120.0 . . ?
 C31G C23G C15G 108.0 . . ?
 C16G C24G C30G 120.1 . . ?
 C16G C24G C32G 120.0 . . ?
 C32G C24G C30G 108.1 . . ?
 C18G C25G C19G 119.7 . . ?
 C18G C25G C33G 119.6 . . ?
 C19G C25G C33G 108.1 . . ?
 C32G C26G C19G 120.0 . . ?
 C32G C26G C34G 120.0 . . ?
 C34G C26G C19G 108.0 . . ?
 C6G C27G C35G 108.1 . . ?
 C20G C27G C6G 120.1 . . ?
 C20G C27G C35G 119.9 . . ?
 C31G C28G C21G 107.9 . . ?
 C36G C28G C21G 120.0 . . ?
 C36G C28G C31G 120.1 . . ?
 C22G C29G C36G 120.0 . . ?
 C22G C29G C37G 120.0 . . ?
 C37G C29G C36G 108.0 . . ?
 C23G C30G C24G 120.0 . . ?
 C23G C30G C38G 119.9 . . ?
 C24G C30G C38G 108.0 . . ?
 C28G C31G C23G 108.1 . . ?
 C39G C31G C23G 120.0 . . ?
 C39G C31G C28G 120.0 . . ?
 C24G C32G C40G 108.1 . . ?
 C26G C32G C24G 120.0 . . ?
 C26G C32G C40G 119.9 . . ?
 C25G C33G C34G 107.9 . . ?
 C41G C33G C25G 120.1 . . ?
 C41G C33G C34G 119.9 . . ?
 C26G C34G C33G 108.0 . . ?
 C42G C34G C26G 120.1 . . ?
 C42G C34G C33G 120.0 . . ?
 C27G C35G C43G 107.8 . . ?
 C37G C35G C27G 120.0 . . ?
 C37G C35G C43G 120.2 . . ?
 C28G C36G C29G 120.0 . . ?
 C28G C36G C44G 119.9 . . ?
 C44G C36G C29G 108.1 . . ?
 C29G C37G C45G 107.9 . . ?
 C35G C37G C29G 120.0 . . ?
 C35G C37G C45G 119.9 . . ?
 C40G C38G C30G 107.9 . . ?
 C46G C38G C30G 120.0 . . ?
 C46G C38G C40G 120.1 . . ?
 C31G C39G C46G 120.1 . . ?
 C31G C39G C47G 119.9 . . ?
 C46G C39G C47G 107.9 . . ?
 C32G C40G C38G 108.0 . . ?
 C48G C40G C32G 120.2 . . ?
 C48G C40G C38G 119.9 . . ?
 C3G C41G C50G 108.0 . . ?
 C33G C41G C3G 120.0 . . ?
 C33G C41G C50G 120.1 . . ?
 C34G C42G C48G 119.9 . . ?
 C34G C42G C51G 120.0 . . ?
 C51G C42G C48G 108.0 . . ?
 C5G C43G C35G 108.1 . . ?
 C52G C43G C5G 120.0 . . ?
 C52G C43G C35G 119.8 . . ?
 C36G C44G C45G 107.9 . . ?
 C47G C44G C36G 120.1 . . ?
 C47G C44G C45G 119.9 . . ?
 C44G C45G C37G 108.0 . . ?
 C53G C45G C37G 119.9 . . ?
 C53G C45G C44G 120.1 . . ?
 C38G C46G C39G 120.0 . . ?
 C38G C46G C54G 120.0 . . ?
 C39G C46G C54G 108.1 . . ?
 C44G C47G C39G 120.0 . . ?
 C44G C47G C55G 120.0 . . ?
 C55G C47G C39G 108.1 . . ?
 C40G C48G C42G 119.9 . . ?
 C40G C48G C56G 120.1 . . ?
 C56G C48G C42G 107.9 . . ?
 C4G C49G C50G 107.9 . . ?
 C57G C49G C4G 120.1 . . ?
 C57G C49G C50G 120.0 . . ?
 C41G C50G C49G 108.1 . . ?
 C51G C50G C41G 119.9 . . ?
 C51G C50G C49G 120.0 . . ?
 C42G C51G C58G 108.1 . . ?
 C50G C51G C42G 120.1 . . ?
 C50G C51G C58G 120.0 . . ?
 C43G C52G C53G 120.1 . . ?
 C43G C52G C57G 119.9 . . ?
 C53G C52G C57G 108.0 . . ?
 C45G C53G C52G 120.1 . . ?
 C45G C53G C59G 119.9 . . ?
 C52G C53G C59G 108.1 . . ?
 C46G C54G C55G 108.0 . . ?
 C56G C54G C46G 120.0 . . ?
 C56G C54G C55G 120.0 . . ?
 C47G C55G C54G 107.9 . . ?
 C59G C55G C47G 120.1 . . ?
 C59G C55G C54G 120.0 . . ?
 C48G C56G C58G 108.0 . . ?
 C54G C56G C48G 120.0 . . ?
 C54G C56G C58G 120.1 . . ?
 C49G C57G C52G 120.0 . . ?
 C49G C57G C60G 120.0 . . ?
 C60G C57G C52G 108.0 . . ?
 C51G C58G C56G 108.0 . . ?
 C60G C58G C51G 120.0 . . ?
 C60G C58G C56G 119.9 . . ?
 C55G C59G C53G 120.0 . . ?
 C55G C59G C60G 120.1 . . ?
 C60G C59G C53G 107.9 . . ?
 C58G C60G C57G 119.9 . . ?
 C58G C60G C59G 120.0 . . ?
 C59G C60G C57G 108.0 . . ?
 C6H C1H C2H 120.2 . . ?
 C6H C1H C17H 120.4 . . ?
 C17H C1H C2H 108.1 . . ?
 C1H C2H C18H 107.9 . . ?
 C3H C2H C1H 120.3 . . ?
 C3H C2H C18H 120.2 . . ?
 C2H C3H C4H 119.7 . . ?
 C2H C3H C41H 119.7 . . ?
 C4H C3H C41H 108.0 . . ?
 C3H C4H C49H 108.1 . . ?
 C5H C4H C3H 120.0 . . ?
 C5H C4H C49H 120.0 . . ?
 C4H C5H C6H 120.0 . . ?
 C4H C5H C43H 120.0 . . ?
 C43H C5H C6H 108.0 . . ?
 C1H C6H C5H 119.7 . . ?
 C1H C6H C27H 119.6 . . ?
 C5H C6H C27H 108.0 . . ?
 C9H C7H C8H 120.0 . . ?
 C9H C7H C10H 120.0 . . ?
 C10H C7H C8H 107.9 . . ?
 C11H C8H C7H 119.6 . . ?
 C11H C8H C12H 119.8 . . ?
 C12H C8H C7H 108.0 . . ?
 C7H C9H C13H 120.0 . . ?
 C7H C9H C14H 120.1 . . ?
 C14H C9H C13H 107.9 . . ?
 C15H C10H C7H 120.0 . . ?
 C15H C10H C16H 120.1 . . ?
 C16H C10H C7H 108.0 . . ?
 C8H C11H C17H 120.4 . . ?
 C8H C11H C18H 120.2 . . ?
 C17H C11H C18H 108.0 . . ?
 C17H C13H C9H 119.7 . . ?
 C17H C13H C20H 119.7 . . ?
 C20H C13H C9H 108.0 . . ?
 C16H C12H C8H 108.0 . . ?
 C19H C12H C8H 119.9 . . ?
 C19H C12H C16H 120.0 . . ?
 C21H C14H C9H 119.8 . . ?
 C21H C14H C22H 120.0 . . ?
 C22H C14H C9H 108.0 . . ?
 C10H C15H C21H 120.0 . . ?
 C10H C15H C23H 120.0 . . ?
 C21H C15H C23H 107.9 . . ?
 C12H C16H C10H 108.1 . . ?
 C24H C16H C10H 119.9 . . ?
 C24H C16H C12H 119.9 . . ?
 C1H C17H C11H 108.0 . . ?
 C1H C17H C13H 120.3 . . ?
 C13H C17H C11H 120.2 . . ?
 C2H C18H C11H 107.9 . . ?
 C25H C18H C2H 120.3 . . ?
 C25H C18H C11H 120.3 . . ?
 C12H C19H C25H 120.1 . . ?
 C12H C19H C26H 120.0 . . ?
 C26H C19H C25H 108.0 . . ?
 C22H C20H C13H 108.0 . . ?
 C27H C20H C13H 120.0 . . ?
 C27H C20H C22H 120.1 . . ?
 C14H C21H C15H 120.1 . . ?
 C14H C21H C28H 119.9 . . ?
 C15H C21H C28H 108.1 . . ?
 C14H C22H C20H 108.0 . . ?
 C29H C22H C14H 120.0 . . ?
 C29H C22H C20H 120.0 . . ?
 C30H C23H C15H 119.9 . . ?
 C30H C23H C31H 119.9 . . ?
 C31H C23H C15H 108.0 . . ?
 C16H C24H C30H 120.0 . . ?
 C16H C24H C32H 120.1 . . ?
 C32H C24H C30H 108.0 . . ?
 C18H C25H C19H 119.6 . . ?
 C18H C25H C33H 119.6 . . ?
 C33H C25H C19H 108.0 . . ?
 C19H C26H C34H 108.0 . . ?
 C32H C26H C19H 120.0 . . ?
 C32H C26H C34H 120.0 . . ?
 C6H C27H C35H 108.1 . . ?
 C20H C27H C6H 120.1 . . ?
 C20H C27H C35H 119.9 . . ?
 C31H C28H C21H 107.9 . . ?
 C36H C28H C21H 120.0 . . ?
 C36H C28H C31H 120.1 . . ?
 C22H C29H C36H 120.0 . . ?
 C22H C29H C37H 120.0 . . ?
 C36H C29H C37H 108.1 . . ?
 C23H C30H C24H 120.0 . . ?
 C23H C30H C38H 119.9 . . ?
 C24H C30H C38H 108.0 . . ?
 C28H C31H C23H 108.0 . . ?
 C39H C31H C23H 120.1 . . ?
 C39H C31H C28H 120.0 . . ?
 C24H C32H C40H 108.1 . . ?
 C26H C32H C24H 119.9 . . ?
 C26H C32H C40H 119.9 . . ?
 C25H C33H C34H 107.9 . . ?
 C41H C33H C25H 120.1 . . ?
 C41H C33H C34H 120.0 . . ?
 C26H C34H C33H 108.0 . . ?
 C42H C34H C26H 120.0 . . ?
 C42H C34H C33H 120.0 . . ?
 C27H C35H C43H 107.9 . . ?
 C37H C35H C27H 120.1 . . ?
 C37H C35H C43H 120.1 . . ?
 C28H C36H C29H 120.1 . . ?
 C28H C36H C44H 119.8 . . ?
 C29H C36H C44H 108.0 . . ?
 C35H C37H C29H 120.0 . . ?
 C35H C37H C45H 120.0 . . ?
 C45H C37H C29H 107.9 . . ?
 C30H C38H C40H 107.9 . . ?
 C46H C38H C30H 120.0 . . ?
 C46H C38H C40H 120.1 . . ?
 C31H C39H C46H 120.0 . . ?
 C31H C39H C47H 120.0 . . ?
 C46H C39H C47H 108.0 . . ?
 C32H C40H C38H 107.9 . . ?
 C48H C40H C32H 120.3 . . ?
 C48H C40H C38H 119.8 . . ?
 C3H C41H C50H 108.0 . . ?
 C33H C41H C3H 120.0 . . ?
 C33H C41H C50H 120.1 . . ?
 C34H C42H C48H 120.0 . . ?
 C34H C42H C51H 120.0 . . ?
 C51H C42H C48H 107.9 . . ?
 C5H C43H C35H 108.1 . . ?
 C52H C43H C5H 120.1 . . ?
 C52H C43H C35H 119.8 . . ?
 C45H C44H C36H 107.8 . . ?
 C47H C44H C36H 120.1 . . ?
 C47H C44H C45H 120.0 . . ?
 C37H C45H C44H 108.2 . . ?
 C53H C45H C37H 119.9 . . ?
 C53H C45H C44H 119.9 . . ?
 C38H C46H C39H 120.1 . . ?
 C38H C46H C54H 120.0 . . ?
 C39H C46H C54H 108.0 . . ?
 C39H C47H C55H 108.1 . . ?
 C44H C47H C39H 120.0 . . ?
 C44H C47H C55H 120.0 . . ?
 C40H C48H C42H 119.8 . . ?
 C40H C48H C56H 120.1 . . ?
 C56H C48H C42H 107.9 . . ?
 C4H C49H C50H 108.0 . . ?
 C57H C49H C4H 120.0 . . ?
 C57H C49H C50H 120.0 . . ?
 C49H C50H C41H 108.0 . . ?
 C51H C50H C41H 119.9 . . ?
 C51H C50H C49H 120.0 . . ?
 C42H C51H C58H 108.1 . . ?
 C50H C51H C42H 120.0 . . ?
 C50H C51H C58H 120.0 . . ?
 C43H C52H C53H 120.0 . . ?
 C43H C52H C57H 119.9 . . ?
 C53H C52H C57H 108.0 . . ?
 C45H C53H C52H 120.1 . . ?
 C45H C53H C59H 119.9 . . ?
 C52H C53H C59H 108.0 . . ?
 C46H C54H C55H 108.0 . . ?
 C56H C54H C46H 120.0 . . ?
 C56H C54H C55H 120.0 . . ?
 C47H C55H C54H 107.9 . . ?
 C59H C55H C47H 120.1 . . ?
 C59H C55H C54H 119.9 . . ?
 C54H C56H C48H 120.0 . . ?
 C54H C56H C58H 120.1 . . ?
 C58H C56H C48H 108.0 . . ?
 C49H C57H C52H 120.0 . . ?
 C49H C57H C60H 120.0 . . ?
 C52H C57H C60H 108.0 . . ?
 C51H C58H C56H 108.1 . . ?
 C60H C58H C51H 120.0 . . ?
 C60H C58H C56H 119.9 . . ?
 C55H C59H C53H 120.0 . . ?
 C55H C59H C60H 120.1 . . ?
 C60H C59H C53H 108.0 . . ?
 C58H C60H C57H 120.0 . . ?
 C58H C60H C59H 120.0 . . ?
 C59H C60H C57H 108.0 . . ?
 C11 C10 C15 120.0 . . ?
 C11 C10 C16 120.9(5) . . ?
 C15 C10 C16 119.0(5) . . ?
 C10 C11 H11 120.0 . . ?
 C10 C11 C12 120.0 . . ?
 C12 C11 H11 120.0 . . ?
 C11 C12 C17 119.6(6) . . ?
 C13 C12 C11 120.0 . . ?
 C13 C12 C17 119.6(6) . . ?
 C12 C13 H13 120.0 . . ?
 C12 C13 C14 120.0 . . ?
 C14 C13 H13 120.0 . . ?
 C13 C14 C15 120.0 . . ?
 C13 C14 C18 120.5(5) . . ?
 C15 C14 C18 119.0(5) . . ?
 C10 C15 H15 120.0 . . ?
 C14 C15 C10 120.0 . . ?
 C14 C15 H15 120.0 . . ?
 C10 C16 H16A 109.5 . . ?
 C10 C16 H16B 109.5 . . ?
 C10 C16 H16C 109.5 . . ?
 H16A C16 H16B 109.5 . . ?
 H16A C16 H16C 109.5 . . ?
 H16B C16 H16C 109.5 . . ?
 C12 C17 H17A 109.5 . . ?
 C12 C17 H17B 109.5 . . ?
 C12 C17 H17C 109.5 . . ?
 H17A C17 H17B 109.5 . . ?
 H17A C17 H17C 109.5 . . ?
 H17B C17 H17C 109.5 . . ?
 C14 C18 H18A 109.5 . . ?
 C14 C18 H18B 109.5 . . ?
 C14 C18 H18C 109.5 . . ?
 H18A C18 H18B 109.5 . . ?
 H18A C18 H18C 109.5 . . ?
 H18B C18 H18C 109.5 . . ?

_shelx_res_file
;
TITL JW18282 in P23
    jw18282.res
    created by SHELXL-2016/6 at 15:48:45 on 30-Oct-2016
CELL 1.34139 18.9035 18.9035 18.9035 90 90 90
ZERR 4 0.0009 0.0009 0.0009 0 0 0
LATT 1
SYMM 0.5-X,-Y,0.5+Z
SYMM -X,0.5+Y,0.5-Z
SYMM 0.5+X,0.5-Y,-Z
SYMM +Z,+X,+Y
SYMM 0.5+Z,0.5-X,-Y
SYMM 0.5-Z,-X,0.5+Y
SYMM -Z,0.5+X,0.5-Y
SYMM +Y,+Z,+X
SYMM -Y,0.5+Z,0.5-X
SYMM 0.5+Y,0.5-Z,-X
SYMM 0.5-Y,-Z,0.5+X
SFAC C H N S
DISP C 0.014 0.007 57.748
DISP N 0.025 0.014 110.512
DISP S 0.292 0.425 3241.763
UNIT 436.07 112 48 24
DFIX 1.54 0.001 C10 C16 C12 C17 C14 C18
SADI 0.001 N1A S1A N2A S1A N1B S1B N2B S1B
SADI 0.002 C3A S1A C4A S1A C1B S1B C2B S1B
SADI 0.002 C16 C11 C16 C15 C11 C17 C13 C17 C13 C18 C15 C18
DELU 0.002 0.001 C1A > C6A
DELU 0.002 0.001 C1B > C6B
DELU 0.005 0.005 C10 > C18
SIMU 0.005 0.002 1.7 C10 > C18
SIMU 0.01 0.002 1.7 S1A > C8
SUMP 1 0.0001 1 2 1 3 1 4 1 5 1 6 1 7

L.S. 15
PLAN  8
SIZE 0.02 0.16 0.18
TEMP -173.15
BOND $H
MORE -1
BOND $H
LIST 4
fmap 2 53
acta
MERG 0
OMIT -5 0 -8
OMIT 8 5 0
OMIT 0 8 -5
OMIT -8 5 0
OMIT 5 0 -8
OMIT 5 0 8
OMIT 0 8 5
OMIT 4 1 0
OMIT 0 4 -1
OMIT -1 0 -4
OMIT -4 1 0
OMIT 0 -4 -17
OMIT -2 5 -2
OMIT 1 0 -4
OMIT 0 -4 1
OMIT 2 -5 2
OMIT -1 0 4
OMIT 5 -2 2
OMIT 2 -2 5
OMIT 0 -4 -1
OMIT 1 0 4
OMIT -4 17 0
OMIT 0 4 1
OMIT -17 0 -4
OMIT 0 4 -17
OMIT -2 2 -5
OMIT 17 0 -4
OMIT 17 0 4
OMIT -5 2 -2
OMIT -6 5 1
OMIT -2 -2 5
OMIT 5 -1 6
REM <olex2.extras>
REM <HklSrc "%.\\JW18282.hkl">
REM </olex2.extras>

WGHT    0.042800   12.721400
BASF   0.98478
FVAR       4.39227   0.14630   0.11405   0.14413   0.22385   0.22138   0.15052
FVAR       0.02086
PART 1
S1A   4    0.404103    0.302299    0.200880    10.50000    0.06443    0.05525 =
         0.05984   -0.01667   -0.02037    0.01535
N1A   3    0.487651    0.312019    0.185133    10.50000    0.07244    0.03985 =
         0.04368   -0.00589   -0.01214    0.00892
N2A   3    0.405255    0.242005    0.261489    10.50000    0.03141    0.05634 =
         0.06905   -0.01349   -0.00907   -0.00059
AFIX  66
C1A   1    0.618969    0.211685    0.286255    10.50000    0.04205    0.01498 =
         0.02517    0.00344   -0.00126   -0.00117
C2A   1    0.592719    0.258817    0.236292    10.50000    0.04656    0.02039 =
         0.02819   -0.00051   -0.00716   -0.00183
AFIX  43
H2A   2    0.624398    0.285054    0.207418    10.50000   -1.20000
AFIX  65
C3A   1    0.520119    0.267560    0.228574    10.50000    0.05049    0.02942 =
         0.03794   -0.00651   -0.00825    0.00155
C4A   1    0.473768    0.229171    0.270820    10.50000    0.05025    0.04801 =
         0.04705   -0.00553   -0.00483    0.00437
C5A   1    0.500017    0.182039    0.320784    10.50000    0.06018    0.06464 =
         0.06778    0.02024    0.00495   -0.01701
AFIX  43
H5A   2    0.468338    0.155802    0.349657    10.50000   -1.20000
AFIX  65
C6A   1    0.572617    0.173295    0.328502    10.50000    0.04825    0.03580 =
         0.04724    0.01101   -0.00134   -0.00317
AFIX   0
PART 0
PART 2
S1B   4    0.390819    0.270884    0.227120    10.50000    0.05593    0.13359 =
         0.14139   -0.09063   -0.04610    0.04729
N1B   3    0.401280    0.209687    0.286055    10.50000    0.05011    0.09850 =
         0.12723   -0.05948   -0.02071    0.01853
N2B   3    0.471411    0.291308    0.206447    10.50000    0.07149    0.07026 =
         0.07859   -0.03490   -0.03792    0.03556
AFIX  66
C1B   1    0.471699    0.206413    0.291191    10.50000    0.03733    0.05701 =
         0.06331   -0.02634   -0.00973    0.00223
C2B   1    0.511805    0.249459    0.247085    10.50000    0.04966    0.05121 =
         0.05240   -0.01776   -0.01358    0.01312
C3B   1    0.585230    0.246453    0.249624    10.50000    0.06309    0.03816 =
         0.06419   -0.00054   -0.00302   -0.00167
AFIX  43
H3B   2    0.612641    0.275873    0.219479    10.50000   -1.20000
AFIX  65
C4B   1    0.618551    0.200401    0.296269    10.50000    0.03768    0.05266 =
         0.06174    0.00432   -0.00049   -0.00107
C5B   1    0.578445    0.157354    0.340376    10.50000    0.04060    0.03471 =
         0.07638    0.00867    0.01207   -0.00712
C6B   1    0.505020    0.160360    0.337838    10.50000    0.04514    0.04914 =
         0.07271   -0.01197    0.01708   -0.01626
AFIX  43
H6B   2    0.477609    0.130939    0.367983    10.50000   -1.20000
AFIX   0
PART 0
C7    1    0.696400    0.196400    0.303600    10.33333    0.04010    0.04010 =
         0.04010    0.00043    0.00043   -0.00043
PART 1
AFIX  13
H7A   2    0.726942    0.226942    0.273058    10.16665   -1.20000
AFIX  13
PART 0
PART 2
H7B   2    0.726942    0.226942    0.273058    10.16665   -1.20000
AFIX   0
PART 0
C8    1    0.617283    0.117283    0.382717    10.33333    0.07417    0.07417 =
         0.07417    0.02131    0.02131   -0.02131
PART 2
AFIX  13
H8B   2    0.586742    0.086741    0.413259    10.16665   -1.20000
AFIX  13
PART 0
PART 1
H8A   2    0.586742    0.086740    0.413260    10.16665   -1.20000
AFIX   6

PART 0
PART -1
C1C   1    0.356960    0.577181    0.393920    20.16667   81.00000
C2C   1    0.377290    0.516431    0.350710    20.16667   81.00000
C3C   1    0.364620    0.447331    0.375881    20.16667   81.00000
C4C   1    0.331581    0.436691    0.442191    20.16667   81.00000
C5C   1    0.310920    0.495171    0.483770    20.16667   81.00000
C6C   1    0.324770    0.566801    0.458620    20.16667   81.00000
C7C   1    0.345250    0.609891    0.519280    20.16667   81.00000
C8C   1    0.396930    0.660992    0.511929    20.16667   81.00000
C9C   1    0.430929    0.672001    0.443629    20.16667   81.00000
C10C  1    0.411580    0.631171    0.386190    20.16667   81.00000
C11C  1    0.465570    0.603911    0.338210    20.16667   81.00000
C12C  1    0.536060    0.618881    0.350420    20.16667   81.00000
C13C  1    0.556529    0.662042    0.411019    20.16667   81.00000
C14C  1    0.505399    0.687822    0.456419    20.16667   81.00000
C15C  1    0.517429    0.686562    0.532609    20.16667   81.00000
C16C  1    0.579760    0.659662    0.559349    20.16667   81.00000
C17C  1    0.633690    0.632283    0.511499    20.16667   81.00000
C18C  1    0.622500    0.633482    0.439359    20.16667   81.00000
C19C  1    0.642730    0.572832    0.396070    20.16667   81.00000
C20C  1    0.673250    0.514342    0.427410    20.16667   81.00000
C21C  1    0.685070    0.513083    0.503610    20.16667   81.00000
C22C  1    0.665900    0.570483    0.544550    20.16667   81.00000
C23C  1    0.631820    0.559443    0.612880    20.16667   81.00000
C24C  1    0.618811    0.491743    0.636670    20.16667   81.00000
C25C  1    0.639051    0.431083    0.593500    20.16667   81.00000
C26C  1    0.671311    0.441473    0.528730    20.16667   81.00000
C27C  1    0.650841    0.398463    0.468070    20.16667   81.00000
C28C  1    0.599181    0.347192    0.475391    20.16667   81.00000
C29C  1    0.565091    0.336242    0.543751    20.16667   81.00000
C30C  1    0.584471    0.377033    0.601201    20.16667   81.00000
C31C  1    0.530451    0.404303    0.649180    20.16667   81.00000
C32C  1    0.460001    0.389332    0.637071    20.16667   81.00000
C33C  1    0.439571    0.346252    0.576371    20.16667   81.00000
C34C  1    0.490571    0.320512    0.530971    20.16667   81.00000
C35C  1    0.478641    0.321722    0.454751    20.16667   81.00000
C36C  1    0.415081    0.350231    0.427751    20.16667   81.00000
C37C  1    0.362771    0.376731    0.474181    20.16667   81.00000
C38C  1    0.373571    0.374752    0.548071    20.16667   81.00000
C39C  1    0.353341    0.435452    0.591331    20.16667   81.00000
C40C  1    0.322940    0.493971    0.560110    20.16667   81.00000
C41C  1    0.344100    0.564852    0.581950    20.16667   81.00000
C42C  1    0.394630    0.573442    0.634050    20.16667   81.00000
C43C  1    0.449150    0.627442    0.626359    20.16667   81.00000
C44C  1    0.515150    0.599003    0.654600    20.16667   81.00000
C45C  1    0.501310    0.527383    0.679780    20.16667   81.00000
C46C  1    0.426790    0.511532    0.667090    20.16667   81.00000
C47C  1    0.578630    0.614543    0.622059    20.16667   81.00000
C48C  1    0.450320    0.670022    0.567050    20.16667   81.00000
C49C  1    0.551581    0.475153    0.671040    20.16667   81.00000
C50C  1    0.545701    0.338192    0.420341    20.16667   81.00000
C51C  1    0.546781    0.380872    0.361071    20.16667   81.00000
C52C  1    0.601311    0.434922    0.353460    20.16667   81.00000
C53C  1    0.651990    0.443382    0.405470    20.16667   81.00000
C54C  1    0.416271    0.393861    0.366951    20.16667   81.00000
C55C  1    0.480961    0.409291    0.332691    20.16667   81.00000
C56C  1    0.494750    0.480941    0.307660    20.16667   81.00000
C57C  1    0.444360    0.533041    0.316300    20.16667   81.00000
C68C  1    0.569190    0.496721    0.320350    20.16667   81.00000
C59C  1    0.589220    0.563882    0.341160    20.16667   81.00000
C60C  1    0.406781    0.444502    0.646330    20.16667   81.00000
AFIX   6

PART 0
PART -2
C1D   1    0.343866    0.474694    0.395831    30.16667   81.00000
C2D   1    0.396305    0.446303    0.346831    30.16667   81.00000
C3D   1    0.430294    0.381712    0.362400    30.16667   81.00000
C4D   1    0.413013    0.343942    0.424680    30.16667   81.00000
C5D   1    0.361564    0.370603    0.471850    30.16667   81.00000
C6D   1    0.326985    0.437963    0.456531    30.16667   81.00000
C7D   1    0.317806    0.475743    0.523301    30.16667   81.00000
C8D   1    0.326098    0.548143    0.525642    30.16667   81.00000
C9D   1    0.343828    0.587143    0.461372    30.16667   81.00000
C10D  1    0.352507    0.551403    0.398322    30.16667   81.00000
C11D  1    0.410357    0.570383    0.350802    30.16667   81.00000
C12D  1    0.456368    0.624062    0.368942    30.16667   81.00000
C13D  1    0.447229    0.661871    0.435722    30.16667   81.00000
C14D  1    0.392459    0.643832    0.480572    30.16667   81.00000
C15D  1    0.404690    0.640071    0.556782    30.16667   81.00000
C16D  1    0.470990    0.654380    0.583832    30.16667   81.00000
C17D  1    0.528790    0.673429    0.536381    30.16667   81.00000
C18D  1    0.517280    0.677000    0.464412    30.16667   81.00000
C19D  1    0.569659    0.648669    0.415361    30.16667   81.00000
C20D  1    0.630889    0.618178    0.441071    30.16667   81.00000
C21D  1    0.643209    0.614297    0.517231    30.16667   81.00000
C22D  1    0.593560    0.641227    0.563491    30.16667   81.00000
C23D  1    0.575689    0.602317    0.627741    30.16667   81.00000
C24D  1    0.608408    0.538607    0.642140    30.16667   81.00000
C25D  1    0.660877    0.510286    0.593240    30.16667   81.00000
C26D  1    0.677798    0.547006    0.532350    30.16667   81.00000
C27D  1    0.686907    0.509317    0.465730    30.16667   81.00000
C28D  1    0.678635    0.436807    0.463289    30.16667   81.00000
C29D  1    0.660865    0.397827    0.527599    30.16667   81.00000
C30D  1    0.652196    0.433506    0.590679    30.16667   81.00000
C31D  1    0.594276    0.414597    0.638130    30.16667   81.00000
C32D  1    0.548315    0.360888    0.619989    30.16667   81.00000
C33D  1    0.557554    0.323068    0.553209    30.16667   81.00000
C34D  1    0.612204    0.341078    0.508459    30.16667   81.00000
C35D  1    0.599883    0.344998    0.432239    30.16667   81.00000
C36D  1    0.531853    0.331150    0.405059    30.16667   81.00000
C37D  1    0.475733    0.312661    0.450979    30.16667   81.00000
C38D  1    0.487423    0.307970    0.524619    30.16667   81.00000
C39D  1    0.434994    0.336331    0.573560    30.16667   81.00000
C40D  1    0.373754    0.366772    0.547930    30.16667   81.00000
C41D  1    0.346736    0.431792    0.579731    30.16667   81.00000
C42D  1    0.382327    0.462731    0.635481    30.16667   81.00000
C43D  1    0.390978    0.539341    0.637892    30.16667   81.00000
C44D  1    0.461059    0.554530    0.666581    30.16667   81.00000
C45D  1    0.495647    0.487189    0.681881    30.16667   81.00000
C46D  1    0.447006    0.430470    0.662640    30.16667   81.00000
C47D  1    0.499930    0.610489    0.640231    30.16667   81.00000
C48D  1    0.363659    0.580902    0.584592    30.16667   81.00000
C49D  1    0.567267    0.479467    0.670040    30.16667   81.00000
C50D  1    0.641014    0.404018    0.404419    30.16667   81.00000
C51D  1    0.613665    0.445629    0.351059    30.16667   81.00000
C52D  1    0.622366    0.522239    0.353480    30.16667   81.00000
C53D  1    0.657967    0.553228    0.409160    30.16667   81.00000
C54D  1    0.503643    0.373771    0.350190    30.16667   81.00000
C55D  1    0.543674    0.430470    0.322360    30.16667   81.00000
C56D  1    0.509016    0.497741    0.307140    30.16667   81.00000
C57D  1    0.437476    0.505522    0.319021    30.16667   81.00000
C58D  1    0.557667    0.554470    0.326311    30.16667   81.00000
C59D  1    0.532088    0.615870    0.356401    30.16667   81.00000
C60D  1    0.472605    0.369099    0.632570    30.16667   81.00000
AFIX   6

PART 0
PART -3
C1E   1    0.330842    0.424457    0.497561    40.16667   81.00000
C2E   1    0.363132    0.390527    0.439231    40.16667   81.00000
C3E   1    0.415972    0.338927    0.450140    40.16667   81.00000
C4E   1    0.437891    0.321216    0.521950    40.16667   81.00000
C5E   1    0.406301    0.354215    0.578910    40.16667   81.00000
C6E   1    0.350972    0.406796    0.567301    40.16667   81.00000
C7E   1    0.383504    0.626367    0.441724    40.16667   81.00000
C8E   1    0.374744    0.570478    0.389203    40.16667   81.00000
C9E   1    0.359654    0.616457    0.509974    40.16667   81.00000
C10E  1    0.451764    0.660237    0.429285    40.16667   81.00000
C11E  1    0.342643    0.505968    0.408912    40.16667   81.00000
C12E  1    0.437554    0.569868    0.344264    40.16667   81.00000
C13E  1    0.325533    0.549957    0.529653    40.16667   81.00000
C14E  1    0.402583    0.639795    0.569744    40.16667   81.00000
C15E  1    0.492344    0.682446    0.485775    40.16667   81.00000
C16E  1    0.485104    0.625358    0.369015    40.16667   81.00000
C17E  1    0.318073    0.495747    0.478822    40.16667   81.00000
C18E  1    0.370443    0.440978    0.384402    40.16667   81.00000
C19E  1    0.464703    0.506488    0.320503    40.16667   81.00000
C20E  1    0.347523    0.532245    0.601603    40.16667   81.00000
C21E  1    0.467154    0.671855    0.557895    40.16667   81.00000
C22E  1    0.395043    0.587815    0.626253    40.16667   81.00000
C23E  1    0.568724    0.670855    0.485355    40.16667   81.00000
C24E  1    0.557334    0.614357    0.368685    40.16667   81.00000
C25E  1    0.430593    0.440018    0.339982    40.16667   81.00000
C26E  1    0.540943    0.494918    0.319973    40.16667   81.00000
C27E  1    0.359832    0.462655    0.619822    40.16667   81.00000
C28E  1    0.527884    0.653744    0.602115    40.16667   81.00000
C29E  1    0.452493    0.570634    0.668074    40.16667   81.00000
C30E  1    0.600254    0.637796    0.428385    40.16667   81.00000
C31E  1    0.590654    0.653094    0.557225    40.16667   81.00000
C32E  1    0.586003    0.547387    0.343464    40.16667   81.00000
C33E  1    0.485802    0.387438    0.351761    40.16667   81.00000
C34E  1    0.553993    0.421367    0.339362    40.16667   81.00000
C35E  1    0.420522    0.444664    0.663992    40.16667   81.00000
C36E  1    0.520683    0.604603    0.655594    40.16667   81.00000
C37E  1    0.465562    0.497103    0.687423    40.16667   81.00000
C38E  1    0.655573    0.585135    0.440035    40.16667   81.00000
C39E  1    0.642903    0.603344    0.568255    40.16667   81.00000
C40E  1    0.646743    0.529246    0.387474    40.16667   81.00000
C41E  1    0.478712    0.338277    0.405190    40.16667   81.00000
C42E  1    0.611583    0.404136    0.381082    40.16667   81.00000
C43E  1    0.449171    0.377574    0.638701    40.16667   81.00000
C44E  1    0.576033    0.552023    0.667264    40.16667   81.00000
C45E  1    0.541872    0.485603    0.686873    40.16667   81.00000
C46E  1    0.676213    0.568374    0.508104    40.16667   81.00000
C47E  1    0.635383    0.551313    0.624814    40.16667   81.00000
C48E  1    0.659253    0.459736    0.405843    40.16667   81.00000
C49E  1    0.514211    0.309595    0.521550    40.16667   81.00000
C50E  1    0.539452    0.320156    0.449371    40.16667   81.00000
C51E  1    0.604042    0.352356    0.437561    40.16667   81.00000
C52E  1    0.521461    0.366583    0.638311    40.16667   81.00000
C53E  1    0.568982    0.422103    0.663002    40.16667   81.00000
C54E  1    0.689332    0.494864    0.527473    40.16667   81.00000
C55E  1    0.664052    0.484293    0.599593    40.16667   81.00000
C56E  1    0.681012    0.442025    0.477723    40.16667   81.00000
C57E  1    0.554851    0.331744    0.578031    40.16667   81.00000
C58E  1    0.646952    0.375565    0.497232    40.16667   81.00000
C59E  1    0.631842    0.421543    0.618122    40.16667   81.00000
C60E  1    0.623062    0.365654    0.565631    40.16667   81.00000
AFIX   6

PART 0
PART -4
C1F   1    0.335951    0.470828    0.574705    50.16667   81.00000
C2F   1    0.334652    0.424488    0.515935    50.16667   81.00000
C3F   1    0.378672    0.364189    0.514516    50.16667   81.00000
C4F   1    0.426361    0.350159    0.573557    50.16667   81.00000
C5F   1    0.427580    0.395299    0.630917    50.16667   81.00000
C6F   1    0.381180    0.456959    0.632596    50.16667   81.00000
C7F   1    0.389262    0.649109    0.465066    50.16667   81.00000
C8F   1    0.350593    0.591049    0.432136    50.16667   81.00000
C9F   1    0.395781    0.652189    0.537766    50.16667   81.00000
C10F  1    0.449793    0.665909    0.420237    50.16667   81.00000
C11F  1    0.320742    0.537538    0.474915    50.16667   81.00000
C12F  1    0.387174    0.571849    0.366896    50.16667   81.00000
C13F  1    0.363880    0.597209    0.581656    50.16667   81.00000
C14F  1    0.463140    0.672119    0.569708    50.16667   81.00000
C15F  1    0.513522    0.684889    0.450488    50.16667   81.00000
C16F  1    0.448544    0.618199    0.359517    50.16667   81.00000
C17F  1    0.327261    0.540589    0.549425    50.16667   81.00000
C18F  1    0.325273    0.465698    0.454205    50.16667   81.00000
C19F  1    0.391704    0.501889    0.346766    50.16667   81.00000
C20F  1    0.411559    0.583239    0.640757    50.16667   81.00000
C21F  1    0.520381    0.687919    0.527159    50.16667   81.00000
C22F  1    0.472859    0.629489    0.633348    50.16667   81.00000
C23F  1    0.579692    0.657010    0.421769    50.16667   81.00000
C24F  1    0.511114    0.591869    0.332468    50.16667   81.00000
C25F  1    0.359764    0.446979    0.390536    50.16667   81.00000
C26F  1    0.457725    0.474109    0.318147    50.16667   81.00000
C27F  1    0.419919    0.515029    0.665467    50.16667   81.00000
C28F  1    0.590691    0.662079    0.546120    50.16667   81.00000
C29F  1    0.539339    0.605069    0.651149    50.16667   81.00000
C30F  1    0.578424    0.611869    0.364400    50.16667   81.00000
C31F  1    0.627302    0.642980    0.480880    50.16667   81.00000
C32F  1    0.515825    0.517959    0.311128    50.16667   81.00000
C33F  1    0.406054    0.385309    0.389107    50.16667   81.00000
C34F  1    0.466655    0.402089    0.344307    50.16667   81.00000
C35F  1    0.490259    0.489329    0.684288    50.16667   81.00000
C36F  1    0.599880    0.621929    0.606340    50.16667   81.00000
C37F  1    0.548249    0.533069    0.677379    50.16667   81.00000
C38F  1    0.624814    0.550099    0.362880    50.16667   81.00000
C39F  1    0.671142    0.584640    0.479441    50.16667   81.00000
C40F  1    0.586035    0.491989    0.329870    50.16667   81.00000
C41F  1    0.415283    0.345029    0.449247    50.16667   81.00000
C42F  1    0.533165    0.377559    0.362069    50.16667   81.00000
C43F  1    0.494879    0.415219    0.662978    50.16667   81.00000
C44F  1    0.646270    0.560179    0.604671    50.16667   81.00000
C45F  1    0.614349    0.505239    0.648620    50.16667   81.00000
C46F  1    0.669833    0.536860    0.418851    50.16667   81.00000
C47F  1    0.680851    0.542040    0.543081    50.16667   81.00000
C48F  1    0.594584    0.423879    0.354630    50.16667   81.00000
C49F  1    0.492422    0.322339    0.544918    50.16667   81.00000
C50F  1    0.485613    0.319149    0.468088    50.16667   81.00000
C51F  1    0.542893    0.335149    0.425669    50.16667   81.00000
C52F  1    0.557460    0.388929    0.635829    50.16667   81.00000
C53F  1    0.618660    0.435199    0.628510    50.16667   81.00000
C54F  1    0.678763    0.464810    0.444921    50.16667   81.00000
C55F  1    0.685571    0.467970    0.521851    50.16667   81.00000
C56F  1    0.642143    0.409899    0.413800    50.16667   81.00000
C57F  1    0.556161    0.341269    0.575109    50.16667   81.00000
C58F  1    0.610233    0.355009    0.457530    50.16667   81.00000
C59F  1    0.655421    0.416139    0.563210    50.16667   81.00000
C60F  1    0.616722    0.358069    0.530310    50.16667   81.00000
AFIX   6

PART 0
PART -5
C1G   1    0.335663    0.451257    0.575052    60.16667   81.00000
C2G   1    0.342992    0.396837    0.524262    60.16667   81.00000
C3G   1    0.394582    0.343507    0.533352    60.16667   81.00000
C4G   1    0.440972    0.345286    0.594992    60.16667   81.00000
C5G   1    0.433742    0.398356    0.644552    60.16667   81.00000
C6G   1    0.379672    0.452666    0.635442    60.16667   81.00000
C7G   1    0.369963    0.616347    0.440044    60.16667   81.00000
C8G   1    0.340703    0.549188    0.415783    60.16667   81.00000
C9G   1    0.372833    0.631337    0.511494    60.16667   81.00000
C10G  1    0.429733    0.634138    0.394564    60.16667   81.00000
C11G  1    0.316223    0.499328    0.465723    60.16667   81.00000
C12G  1    0.382333    0.525468    0.355203    60.16667   81.00000
C13G  1    0.346443    0.579887    0.562743    60.16667   81.00000
C14G  1    0.435523    0.664877    0.541514    60.16667   81.00000
C15G  1    0.489043    0.665957    0.422914    60.16667   81.00000
C16G  1    0.437333    0.578028    0.342113    60.16667   81.00000
C17G  1    0.319053    0.514567    0.538873    60.16667   81.00000
C18G  1    0.331022    0.426488    0.456662    60.16667   81.00000
C19G  1    0.396813    0.454488    0.346432    60.16667   81.00000
C20G  1    0.392933    0.581666    0.624353    60.16667   81.00000
C21G  1    0.492013    0.681617    0.498404    60.16667   81.00000
C22G  1    0.447933    0.634176    0.611234    60.16667   81.00000
C23G  1    0.559443    0.643387    0.400514    60.16667   81.00000
C24G  1    0.503943    0.556628    0.320983    60.16667   81.00000
C25G  1    0.370432    0.403108    0.397572    60.16667   81.00000
C26G  1    0.467083    0.431938    0.324092    60.16667   81.00000
C27G  1    0.409023    0.519846    0.659683    60.16667   81.00000
C28G  1    0.564273    0.668776    0.522724    60.16667   81.00000
C29G  1    0.516173    0.622046    0.634214    60.16667   81.00000
C30G  1    0.566623    0.590238    0.350874    60.16667   81.00000
C31G  1    0.605843    0.645117    0.462174    60.16667   81.00000
C32G  1    0.519193    0.481648    0.311633    60.16667   81.00000
C33G  1    0.424392    0.348768    0.406912    60.16667   81.00000
C34G  1    0.484182    0.366668    0.361382    60.16667   81.00000
C35G  1    0.481243    0.507086    0.683963    60.16667   81.00000
C36G  1    0.575943    0.639846    0.588684    60.16667   81.00000
C37G  1    0.533243    0.556755    0.671613    60.16667   81.00000
C38G  1    0.620723    0.535828    0.360173    60.16667   81.00000
C39G  1    0.656943    0.593747    0.470834    60.16667   81.00000
C40G  1    0.591303    0.468708    0.335833    60.16667   81.00000
C41G  1    0.436212    0.319827    0.472811    60.16667   81.00000
C42G  1    0.552562    0.354368    0.384322    60.16667   81.00000
C43G  1    0.496403    0.431906    0.674672    60.16667   81.00000
C44G  1    0.630013    0.585546    0.597834    60.16667   81.00000
C45G  1    0.603613    0.534115    0.649083    60.16667   81.00000
C46G  1    0.664553    0.537577    0.418523    60.16667   81.00000
C47G  1    0.669313    0.563066    0.540633    60.16667   81.00000
C48G  1    0.607672    0.406908    0.371122    60.16667   81.00000
C49G  1    0.511352    0.322706    0.572651    60.16667   81.00000
C50G  1    0.508362    0.306937    0.497111    60.16667   81.00000
C51G  1    0.564912    0.323877    0.453992    60.16667   81.00000
C52G  1    0.563022    0.410616    0.653462    60.16667   81.00000
C53G  1    0.617963    0.463076    0.640333    60.16667   81.00000
C54G  1    0.681643    0.472237    0.455843    60.16667   81.00000
C55G  1    0.684603    0.487976    0.531443    60.16667   81.00000
C56G  1    0.653972    0.408727    0.432832    60.16667   81.00000
C57G  1    0.570652    0.354436    0.601012    60.16667   81.00000
C58G  1    0.627572    0.357287    0.483942    60.16667   81.00000
C59G  1    0.659703    0.439416    0.579742    60.16667   81.00000
C60G  1    0.630432    0.372276    0.555492    60.16667   81.00000
AFIX   6

PART 0
PART -6
C1H   1    0.345507    0.473518    0.596641    70.16666   81.00000
C2H   1    0.352177    0.410129    0.557430    70.16666   81.00000
C3H   1    0.406096    0.361138    0.573809    70.16666   81.00000
C4H   1    0.455657    0.376506    0.630939    70.16666   81.00000
C5H   1    0.449127    0.438286    0.669260    70.16666   81.00000
C6H   1    0.392607    0.488176    0.652762    70.16666   81.00000
C7H   1    0.366248    0.608931    0.429684    70.16666   81.00000
C8H   1    0.338317    0.537422    0.421053    70.16666   81.00000
C9H   1    0.372348    0.637960    0.496345    70.16666   81.00000
C10H  1    0.422788    0.618782    0.377994    70.16666   81.00000
C11H  1    0.318417    0.498060    0.481332    70.16666   81.00000
C13H  1    0.350718    0.597278    0.558324    70.16666   81.00000
C12H  1    0.377507    0.503173    0.364002    70.16666   81.00000
C14H  1    0.435238    0.678509    0.515315    70.16666   81.00000
C15H  1    0.482238    0.657211    0.395825    70.16666   81.00000
C16H  1    0.429677    0.553423    0.337463    70.16666   81.00000
C17H  1    0.324567    0.527779    0.549703    70.16666   81.00000
C18H  1    0.335437    0.425300    0.486070    70.16666   81.00000
C19H  1    0.394176    0.432322    0.368750    70.16666   81.00000
C20H  1    0.400278    0.612647    0.615484    70.16666   81.00000
C21H  1    0.488698    0.687729    0.466366    70.16666   81.00000
C22H  1    0.452498    0.662837    0.588845    70.16666   81.00000
C23H  1    0.552148    0.632441    0.374174    70.16666   81.00000
C24H  1    0.495807    0.529962    0.317042    70.16666   81.00000
C25H  1    0.372476    0.391511    0.430580    70.16666   81.00000
C26H  1    0.463936    0.407582    0.347160    70.16666   81.00000
C27H  1    0.420608    0.559596    0.661363    70.16666   81.00000
C28H  1    0.562548    0.682029    0.488365    70.16666   81.00000
C29H  1    0.522358    0.657367    0.609625    70.16666   81.00000
C30H  1    0.558658    0.570542    0.335823    70.16666   81.00000
C31H  1    0.601728    0.647730    0.431385    70.16666   81.00000
C32H  1    0.513407    0.455123    0.321891    70.16666   81.00000
C33H  1    0.428916    0.341651    0.447298    70.16666   81.00000
C34H  1    0.485466    0.351561    0.395648    70.16666   81.00000
C35H  1    0.494458    0.553895    0.683293    70.16666   81.00000
C36H  1    0.578808    0.667277    0.558005    70.16666   81.00000
C37H  1    0.543858    0.601395    0.658184    70.16666   81.00000
C38H  1    0.615207    0.520641    0.352492    70.16666   81.00000
C39H  1    0.655118    0.600509    0.447083    70.16666   81.00000
C40H  1    0.587097    0.449152    0.343820    70.16666   81.00000
C41H  1    0.445276    0.326839    0.516808    70.16666   81.00000
C42H  1    0.555346    0.345990    0.416398    70.16666   81.00000
C43H  1    0.511977    0.478795    0.688231    70.16666   81.00000
C44H  1    0.635308    0.617286    0.574474    70.16666   81.00000
C45H  1    0.613628    0.576665    0.636433    70.16666   81.00000
C46H  1    0.661967    0.535240    0.406582    70.16666   81.00000
C47H  1    0.672358    0.584837    0.520653    70.16666   81.00000
C48H  1    0.607666    0.396230    0.389729    70.16666   81.00000
C49H  1    0.525506    0.351736    0.609358    70.16666   81.00000
C50H  1    0.519146    0.320958    0.538808    70.16666   81.00000
C51H  1    0.572626    0.330469    0.489858    70.16666   81.00000
C52H  1    0.578157    0.455455    0.667761    70.16666   81.00000
C53H  1    0.630217    0.505645    0.641131    70.16666   81.00000
C54H  1    0.683537    0.479159    0.455101    70.16666   81.00000
C55H  1    0.689967    0.509867    0.525681    70.16666   81.00000
C56H  1    0.657107    0.411669    0.446919    70.16666   81.00000
C57H  1    0.585047    0.390136    0.627189    70.16666   81.00000
C58H  1    0.635456    0.370898    0.508719    70.16666   81.00000
C59H  1    0.669517    0.471376    0.584081    70.16666   81.00000
C60H  1    0.641547    0.399966    0.575479    70.16666   81.00000
AFIX  66

PART 0
PART -1
C10   1    0.497662    0.039356    0.536587    10.16667    0.05330
C11   1    0.443296    0.041460    0.487123    10.16667    0.10151
AFIX  43
H11   2    0.407464    0.076521    0.490644    10.16667   -1.20000
AFIX  65
C12   1    0.441356   -0.007735    0.432507    10.16667    0.08584
C13   1    0.493784   -0.059035    0.427355    10.16667    0.04465
AFIX  43
H13   2    0.492458   -0.092658    0.390028    10.16667   -1.20000
AFIX  65
C14   1    0.548150   -0.061139    0.476819    10.16667    0.07005
C15   1    0.550091   -0.011944    0.531434    10.16667    0.07766
AFIX  43
H15   2    0.587248   -0.013383    0.565240    10.16667   -1.20000
AFIX   0
C16   1    0.503166    0.095693    0.594955    10.16667    0.02690
AFIX 137
H16A  2    0.456671    0.117344    0.602513    10.16667   -1.50000
H16B  2    0.537092    0.132176    0.580615    10.16667   -1.50000
H16C  2    0.519242    0.073479    0.638952    10.16667   -1.50000
AFIX   0
C17   1    0.388794    0.002265    0.371404    10.16667    0.11272
AFIX 137
H17A  2    0.413685    0.021411    0.330156    10.16667   -1.50000
H17B  2    0.351496    0.035220    0.385912    10.16667   -1.50000
H17C  2    0.367649   -0.043454    0.359142    10.16667   -1.50000
AFIX   0
C18   1    0.600728   -0.122732    0.477596    10.16667    0.05513
AFIX 137
H18A  2    0.646391   -0.106709    0.459000    10.16667   -1.50000
H18B  2    0.582610   -0.161292    0.448058    10.16667   -1.50000
H18C  2    0.606840   -0.139622    0.526227    10.16667   -1.50000
AFIX   0
HKLF 5


REM  JW18282 in P23
REM R1 =  0.1142 for   75409 Fo > 4sig(Fo)  and  0.1284 for all   91208 data
REM    216 parameters refined using    358 restraints

END

WGHT      0.0425     12.7202

REM Highest difference peak  1.153,  deepest hole -0.793,  1-sigma level  0.213
Q1    1   0.3011  0.3011  0.3011  10.33333  0.05    1.15
Q2    1   0.5556 -0.0188  0.4403  11.00000  0.05    0.80
Q3    1   0.3394  0.0374  0.3388  11.00000  0.05    0.76
Q4    1   0.6194  0.2977  0.2987  11.00000  0.05    0.74
Q5    1   0.5078  0.1847  0.3409  11.00000  0.05    0.74
Q6    1   0.5000  0.0000  0.5000  10.16667  0.05    0.72
Q7    1   0.3790 -0.0331  0.3602  11.00000  0.05    0.68
Q8    1   0.3672  0.1839  0.2746  11.00000  0.05    0.68
;
_shelx_res_checksum               14725
_shelx_hkl_file
;
   0  -2   0     572      64  -2
  -2   0   0     572      64   1
   0   0   2     445      64  -2
   0   0  -2     445      64   1
   2   1   0      64      32   1
   0   2   1      95      32   1
   1   0  -2      64      32   1
   2   1   0      64      32   1
   0  -2   1      64      32   1
   0   2  -1     127      32   1
   0   2  -1      64      32   1
  -2   1   0      95      32   1
  -1   0  -2      64      32   1
  -1   0   2     127      32   1
   0  -2   1      95      32   1
   0  -2   1      95      32   1
   1   1   2   86369    7947  -2
   1   1  -2   86369    7947   1
  -1  -1  -2   86719    7979  -2
  -1  -1   2   86719    7979   1
  -2  -2   0    7566     795  -2
  -2  -2   0    7566     795   1
  -2   0   2    7470     763  -2
   0  -2  -2    7470     763   1
  -2   0  -2    8964     795  -2
   0  -2   2    8964     795   1
   2   0   2    9282     795  -2
   0   2  -2    9282     795   1
   2   0   2    9378     795  -2
   0   2  -2    9378     795   1
   2   0   2    9123     795  -2
   0   2  -2    9123     795   1
   2   0  -2    8360     763  -2
   0   2   2    8360     763   1
   2   2   0    7470     763  -2
   2   2   0    7470     763   1
   2   2   0    8106     763  -2
   2   2   0    8106     763   1
  -1  -2   2    1113     127  -2
  -2  -1  -2    1113     127   1
  -1   2  -2    1367     127  -2
   2  -1   2    1367     127   1
  -2   2  -1    1272     127  -2
   2  -2   1    1272     127   1
   2   2   1    1081     127  -2
   2   2  -1    1081     127   1
   2   1   2    1399     127  -2
   1   2  -2    1399     127   1
  -2   1  -2    1113     127  -2
   1  -2   2    1113     127   1
  -2  -1   2    1208     127  -2
  -1  -2  -2    1208     127   1
   2  -1  -2    1399     127  -2
  -1   2   2    1399     127   1
  -2   1  -2    1240     127  -2
   1  -2   2    1240     127   1
  -2   1  -2    1303     127  -2
   1  -2   2    1303     127   1
   1  -2   2    1303     127  -2
  -2   1  -2    1303     127   1
  -2   1   2    1113     127  -2
   1  -2  -2    1113     127   1
  -2  -2  -1    1367     127  -2
  -2  -2   1    1367     127   1
   2  -1   2    1113     127  -2
  -1   2  -2    1113     127   1
   2  -2   1    1081     127  -2
  -2   2  -1    1081     127   1
  -2  -1  -2    1367     127  -2
  -1  -2   2    1367     127   1
   2  -2   1    1017     127  -2
  -2   2  -1    1017     127   1
   2  -2   1    1144     127  -2
  -2   2  -1    1144     127   1
   2   1  -2    1303     127  -2
   1   2   2    1303     127   1
  -2  -2  -1    1208     127  -2
  -2  -2   1    1208     127   1
  -2  -1  -2    1399     127  -2
  -1  -2   2    1399     127   1
  -1  -2  -2    1144     127  -2
  -2  -1   2    1144     127   1
   1  -2   2    1303     127  -2
  -2   1  -2    1303     127   1
   1  -2   2    1017     127  -2
  -2   1  -2    1017     127   1
   2   2  -1    1335     127  -2
   2   2   1    1335     127   1
  -2  -2   2 1972088  181893  -2
  -2  -2  -2 1972088  181893   1
  -2   2   2 2044502  181861  -2
   2  -2  -2 2044502  181861   1
   2   2  -2 1919892  181893  -2
   2   2   2 1919892  181893   1
   3   1   1  334223   29086  -2
   1   3  -1  334223   29086   1
   1   1   3  325926   29118  -2
   1   1  -3  325926   29118   1
  -1  -3   1  309015   29182  -2
  -3  -1  -1  309015   29182   1
   3  -1  -1  324083   29150  -2
  -1   3   1  324083   29150   1
  -3  -1   1  303897   29150  -2
  -1  -3  -1  303897   29150   1
  -3   1  -1  317820   29086  -2
   1  -3   1  317820   29086   1
  -1   3  -1  327643   29182  -2
   3  -1   1  327643   29182   1
   1   3   1  320840   29182  -2
   3   1  -1  320840   29182   1
  -1   1  -3  286572   29118  -2
   1  -1   3  286572   29118   1
   1  -1  -3  317789   29150  -2
  -1   1   3  317789   29150   1
  -1  -1   3  275097   29150  -2
  -1  -1  -3  275097   29150   1
   1  -3  -1  324750   29150  -2
  -3   1   1  324750   29150   1
   1   3  -1  277322   29150  -2
   3   1   1  277322   29150   1
  -3   1   1  301163   29150  -2
   1  -3  -1  301163   29150   1
   1   1  -3  341280   29182  -2
   1   1   3  341280   29182   1
   1  -1   3  320586   29118  -2
  -1   1  -3  320586   29118   1
   3   1  -1  336003   29150  -2
   1   3   1  336003   29150   1
  -3  -1  -1  317598   29086  -2
  -1  -3   1  317598   29086   1
   3  -1   1  327707   29086  -2
  -1   3  -1  327707   29086   1
  -1   3   1  336576   29182  -2
   3  -1  -1  336576   29182   1
  -1   1   3  334160   29182  -2
   1  -1  -3  334160   29182   1
  -1  -1  -3  295505   29118  -2
  -1  -1   3  295505   29118   1
  -3  -1   2  312512   28228  -2
  -1  -3  -2  312512   28228   1
   1  -2  -3  290006   28196  -2
  -2   1   3  290006   28196   1
  -1  -2   3  314292   28260  -2
  -2  -1  -3  314292   28260   1
  -2  -3   1  303261   28228  -2
  -3  -2  -1  303261   28228   1
  -2   3  -1  294678   28196  -2
   3  -2   1  294678   28196   1
   2  -3  -1  333142   28228  -2
  -3   2   1  333142   28228   1
  -1   2  -3  273666   28164  -2
   2  -1   3  273666   28164   1
   1   2   3  316263   28164  -2
   2   1  -3  316263   28164   1
  -3   1  -2  308475   28133  -2
   1  -3   2  308475   28133   1
   3   1   2  301322   28101  -2
   1   3  -2  301322   28101   1
   3  -1  -2  314483   28228  -2
  -1   3   2  314483   28228   1
  -2   3  -1  312162   28196  -2
   3  -2   1  312162   28196   1
   2   3   1  291627   28196  -2
   3   2  -1  291627   28196   1
  -3   1  -2  305169   28133  -2
   1  -3   2  305169   28133   1
  -3   1   2  312448   28228  -2
   1  -3  -2  312448   28228   1
  -2  -3  -1  313434   28196  -2
  -3  -2   1  313434   28196   1
   1   2  -3  283044   28228  -2
   2   1   3  283044   28228   1
  -2   3   1  313370   28228  -2
   3  -2  -1  313370   28228   1
   3   1  -2  328311   28228  -2
   1   3   2  328311   28228   1
  -1   2   3  310795   28228  -2
   2  -1  -3  310795   28228   1
   2   3  -1  289338   28228  -2
   3   2   1  289338   28228   1
   1  -2   3  295251   28196  -2
  -2   1  -3  295251   28196   1
  -1  -2  -3  314292   28164  -2
  -2  -1   3  314292   28164   1
  -2  -3   0    1685     159   1
   0  -2  -3    1526     159   1
   2   3   0    1335     159   1
   2   3   0    1558     191   1
   3   0   2    1685     159   1
  -2   3   0    1431     159   1
   0  -2   3    1589     159   1
   0   2  -3    1621     159   1
  -2   1  -3    3370     350  -2
   1  -2   3    3370     350   1
  -1   3  -2    3274     350  -2
   3  -1   2    3274     350   1
  -2   1  -3    3497     350  -2
   1  -2   3    3497     350   1
  -2   1  -3    3656     350  -2
   1  -2   3    3656     350   1
   2   1   3    4005     350  -2
   1   2  -3    4005     350   1
   2  -1  -3    3147     318  -2
  -1   2   3    3147     318   1
  -3  -2   1    3179     350  -2
  -2  -3  -1    3179     350   1
  -2  -1  -3    3751     350  -2
  -1  -2   3    3751     350   1
   2  -1   3    3656     350  -2
  -1   2  -3    3656     350   1
   2  -1   3    3656     350  -2
  -1   2  -3    3656     350   1
   3  -2   1    3974     350  -2
  -2   3  -1    3974     350   1
   3  -2   1    3846     318  -2
  -2   3  -1    3846     318   1
  -2  -1  -3    3306     350  -2
  -1  -2   3    3306     350   1
  -2  -2  -3  205480   18882  -2
  -2  -2   3  205480   18882   1
  -1  -3   3 2962615  261078  -2
  -3  -1  -3 2962615  261078   1
  -3  -1   3 2927298  261078  -2
  -1  -3  -3 2927298  261078   1
  -1   3  -3 2593043  261046  -2
   3  -1   3 2593043  261046   1
   3   1  -3 3178840  261078  -2
   1   3   3 3178840  261078   1
  -3   1   3 2790290  261046  -2
   1  -3  -3 2790290  261046   1
   1   3  -3 2662818  261078  -2
   3   1   3 2662818  261078   1
   3   3  -1 2769913  261046  -2
   3   3   1 2769913  261046   1
  -2   3  -3    1176     159  -2
   3  -2   3    1176     159   1
  -3   2  -3    1621     159  -2
   2  -3   3    1621     159   1
  -3   2  -3    1462     159  -2
   2  -3   3    1462     159   1
   3  -3  -2    1653     159  -2
  -3   3   2    1653     159   1
  -3   2  -3    1431     159  -2
   2  -3   3    1431     159   1
   3  -2  -3    1653     127  -2
  -2   3   3    1653     127   1
   3  -2   3    1653     159  -2
  -2   3  -3    1653     159   1
   3  -2   3    1621     159  -2
  -2   3  -3    1621     159   1
  -3  -2  -3    1399     159  -2
  -2  -3   3    1399     159   1
   3  -2   3    1494     159  -2
  -2   3  -3    1494     159   1
   3  -3   2    1399     159  -2
  -3   3  -2    1399     159   1
  -3  -2  -3    1621     159  -2
  -2  -3   3    1621     159   1
  -3  -2  -3    1462     159  -2
  -2  -3   3    1462     159   1
   3  -3   2    1462     159  -2
  -3   3  -2    1462     159   1
   3   2  -3    1208     159  -2
   2   3   3    1208     159   1
  -3  -3  -2    1176     159  -2
  -3  -3   2    1176     159   1
  -3  -3  -2    1335     159  -2
  -3  -3   2    1335     159   1
   3  -3   2    1272     159  -2
  -3   3  -2    1272     159   1
   2  -3   3    1367     159  -2
  -3   2  -3    1367     159   1
   2  -3   3    1431     159  -2
  -3   2  -3    1431     159   1
   3   3  -2    1717     159  -2
   3   3   2    1717     159   1
  -3  -3   3  951808   89357  -2
  -3  -3  -3  951808   89357   1
   3  -3  -3  972852   89325  -2
  -3   3   3  972852   89325   1
   3   3   3 1018373   89230  -2
   3   3  -3 1018373   89230   1
  -3   3  -3  952857   89262  -2
   3  -3   3  952857   89262   1
   3   3   3  959088   89230  -2
   3   3  -3  959088   89230   1
  -3   3   3  990463   89325  -2
   3  -3  -3  990463   89325   1
   3   3  -3  946849   89325  -2
   3   3   3  946849   89325   1
  -4   0   0   81156    7725  -2
   0  -4   0   81156    7725   1
  -4   0   0   80870    7693  -2
   0  -4   0   80870    7693   1
   0   0   4   79662    7725  -2
   0   0  -4   79662    7725   1
   0   0  -4   88912    7725  -2
   0   0   4   88912    7725   1
   4   0   0   81728    7725  -2
   0   4   0   81728    7725   1
   0   4   0   89103    7693  -2
   4   0   0   89103    7693   1
   0   4   0   85606    7693  -2
   4   0   0   85606    7693   1
   0   4  -1     159      32   1
   0   4  -1     127      32   1
   0   4   1     286      64   1
   1   0  -4     159      32   1
   1   0   4     254      32   1
   4   1   0      64      32   1
   4   1   0     127      32   1
   0   4  -1     159      64   1
   0   4  -1      95      64   1
  -1   0  -4     127      32   1
  -1   0   4     191      32   1
   0  -4  -1     223      64   1
   0  -4   1     159      32   1
   0   4  -1     127      32   1
  -4   1   0     127      32   1
   0   2  -4  980163   90947  -2
   2   0   4  980163   90947   1
  -2   4   0 1025144   90947  -2
   4  -2   0 1025144   90947   1
  -4   0   2 1002638   90947  -2
   0  -4  -2 1002638   90947   1
   4   0  -2 1005213   90947  -2
   0   4   2 1005213   90947   1
   0  -2  -4  912104   90915  -2
  -2   0   4  912104   90915   1
  -2  -4   0 1015067   90947  -2
  -4  -2   0 1015067   90947   1
   2   4   0  978510   90947  -2
   4   2   0  978510   90947   1
   0  -4   3     477      64   1
   0   4  -3     509      95   1
   0   4  -3     382      64   1
   0   4  -3     413      64   1
   0  -4   3     509      64   1
  -4   3   0     413      64   1
  -3   0  -4     509      64   1
   0  -4   3     413      64   1
  -4  -3   0     382      64   1
  -3   0   4     445      64   1
   0   4   3     413      64   1
   4   3   0     286      64   1
  -4   1  -1     350      64  -2
   1  -4   1     350      64   1
   4   1   1     540      64  -2
   1   4  -1     540      64   1
   4   1   1     668      64  -2
   1   4  -1     668      64   1
   4   1   1     636      64  -2
   1   4  -1     636      64   1
  -1   1  -4     413      64  -2
   1  -1   4     413      64   1
  -4  -1   1     572      64  -2
  -1  -4  -1     572      64   1
  -1  -1   4     604      64  -2
  -1  -1  -4     604      64   1
  -1   1  -4     604      64  -2
   1  -1   4     604      64   1
   1  -1  -4     509      64  -2
  -1   1   4     509      64   1
   4   1   1     636      95  -2
   1   4  -1     636      95   1
   1   1   4     636      95  -2
   1   1  -4     636      95   1
  -1   1   4     382      64  -2
   1  -1  -4     382      64   1
   1  -1   4     413      64  -2
  -1   1  -4     413      64   1
   4  -1   1     413      64  -2
  -1   4  -1     413      64   1
   1   4  -1     540      64  -2
   4   1   1     540      64   1
  -4  -1  -1     636      95  -2
  -1  -4   1     636      95   1
  -4  -1  -1     540      64  -2
  -1  -4   1     540      64   1
   1   4  -1     572      64  -2
   4   1   1     572      64   1
   1   4  -1     604      64  -2
   4   1   1     604      64   1
   4  -1   1     509      64  -2
  -1   4  -1     509      64   1
   4  -1   1     382      95  -2
  -1   4  -1     382      95   1
   1  -4   1     509      64  -2
  -4   1  -1     509      64   1
   4   1  -1     477      95  -2
   1   4   1     477      95   1
  -1  -1  -4     509      64  -2
  -1  -1   4     509      64   1
  -2  -4   1  131699   13415  -2
  -4  -2  -1  131699   13415   1
   4   1   2  146449   13415  -2
   1   4  -2  146449   13415   1
  -4   1  -2  143525   13415  -2
   1  -4   2  143525   13415   1
  -1   2  -4  137485   13415  -2
   2  -1   4  137485   13415   1
   4  -1   2  152553   13415  -2
  -1   4  -2  152553   13415   1
  -4  -1  -2  154650   13415  -2
  -1  -4   2  154650   13415   1
   2   4  -1  147403   13415  -2
   4   2   1  147403   13415   1
  -1  -2  -4  155000   13415  -2
  -2  -1   4  155000   13415   1
   4  -1   2  145082   13415  -2
  -1   4  -2  145082   13415   1
   2   4  -1  144796   13415  -2
   4   2   1  144796   13415   1
  -4   1  -3   47587    4196  -2
   1  -4   3   47587    4196   1
  -1   3  -4   46284    4196  -2
   3  -1   4   46284    4196   1
  -4  -1   3   44186    4196  -2
  -1  -4  -3   44186    4196   1
  -4   1  -3   50893    4196  -2
   1  -4   3   50893    4196   1
   4   1   3   41325    4196  -2
   1   4  -3   41325    4196   1
   4   1   3   43550    4196  -2
   1   4  -3   43550    4196   1
  -4   1  -3   48573    4196  -2
   1  -4   3   48573    4196   1
   3   4   1   49812    4196  -2
   4   3  -1   49812    4196   1
   4  -1  -3   48287    4196  -2
  -1   4   3   48287    4196   1
  -3  -4   1   48128    4196  -2
  -4  -3  -1   48128    4196   1
   3   4   1   49526    4196  -2
   4   3  -1   49526    4196   1
   4   1   3   40244    4196  -2
   1   4  -3   40244    4196   1
   1  -3  -4   45616    4196  -2
  -3   1   4   45616    4196   1
  -3  -4  -1   44408    4196  -2
  -4  -3   1   44408    4196   1
   1  -3   4   38941    4196  -2
  -3   1  -4   38941    4196   1
   4   1  -3   44313    4196  -2
   1   4   3   44313    4196   1
   4  -1   3   48159    4196  -2
  -1   4  -3   48159    4196   1
   4  -1   3   44599    4196  -2
  -1   4  -3   44599    4196   1
   4  -1   3   49526    4228  -2
  -1   4  -3   49526    4228   1
   1  -3   4   43200    4196  -2
  -3   1  -4   43200    4196   1
  -4   1   3   48445    4196  -2
   1  -4  -3   48445    4196   1
   3  -4   1   44853    4196  -2
  -4   3  -1   44853    4196   1
  -4  -1  -3   40626    4196  -2
  -1  -4   3   40626    4196   1
  -4  -1  -3   39672    4196  -2
  -1  -4   3   39672    4196   1
  -4  -1  -3   44981    4196  -2
  -1  -4   3   44981    4196   1
  -1  -3  -4   51306    4196  -2
  -3  -1   4   51306    4196   1
  -4   2   0 1057536   94920  -2
   2  -4   0 1057536   94920   1
   2   0  -4 1031502   94952  -2
   0   2   4 1031502   94952   1
   0   4  -2  989573   94984  -2
   4   0   2  989573   94984   1
   0   4   2 1023237   94952  -2
   4   0  -2 1023237   94952   1
  -4  -2   0 1041896   94920  -2
  -2  -4   0 1041896   94920   1
   0  -4   2 1031692   94984  -2
  -4   0  -2 1031692   94984   1
  -2   0   4  998156   94952  -2
   0  -2  -4  998156   94952   1
   4  -2   0 1145368   94920  -2
  -2   4   0 1145368   94920   1
   4   2   0 1017610   94920  -2
   2   4   0 1017610   94920   1
  -2   0  -4 1055407   94857  -2
   0  -2   4 1055407   94857   1
   2   0   4  961122   94857  -2
   0   2  -4  961122   94857   1
  -2   1  -4   93013    7852  -2
   1  -2   4   93013    7852   1
  -4   2  -1   89071    7852  -2
   2  -4   1   89071    7852   1
  -4   2  -1   76070    7852  -2
   2  -4   1   76070    7852   1
   4   2   1   83349    7852  -2
   2   4  -1   83349    7852   1
   4   2   1   79344    7852  -2
   2   4  -1   79344    7852   1
   2  -1  -4   86147    7852  -2
  -1   2   4   86147    7852   1
   4  -2  -1   84494    7852  -2
  -2   4   1   84494    7852   1
  -2   1  -4   85829    7852  -2
   1  -2   4   85829    7852   1
  -2   1  -4   88976    7852  -2
   1  -2   4   88976    7852   1
  -4  -2   1   83381    7852  -2
  -2  -4  -1   83381    7852   1
   4   2   1   80520    7852  -2
   2   4  -1   80520    7852   1
   4   2   1   88944    7852  -2
   2   4  -1   88944    7852   1
  -1   4  -2   91265    7852  -2
   4  -1   2   91265    7852   1
   2  -1   4   87736    7852  -2
  -1   2  -4   87736    7852   1
  -2  -1  -4   81919    7852  -2
  -1  -2   4   81919    7852   1
  -2   1   4   81474    7852  -2
   1  -2  -4   81474    7852   1
  -4  -2  -1   87291    7852  -2
  -2  -4   1   87291    7852   1
   1  -4   2   86750    7852  -2
  -4   1  -2   86750    7852   1
  -2  -1  -4   88531    7852  -2
  -1  -2   4   88531    7852   1
  -4  -2  -1   87800    7852  -2
  -2  -4   1   87800    7852   1
   4  -2   1   77341    7852  -2
  -2   4  -1   77341    7852   1
   4  -2   1   88563    7852  -2
  -2   4  -1   88563    7852   1
  -2  -1  -4   87577    7852  -2
  -1  -2   4   87577    7852   1
   2  -1   4   80711    7852  -2
  -1   2  -4   80711    7852   1
   2   4   2 1554802  159927  -2
   4   2  -2 1554802  159927   1
   4  -2  -2 1773856  159864  -2
  -2   4   2 1773856  159864   1
  -2  -4   2 1792865  159927  -2
  -4  -2  -2 1792865  159927   1
   2  -4  -2 1772044  159864  -2
  -4   2   2 1772044  159864   1
  -4  -2   2 1779387  159896  -2
  -2  -4  -2 1779387  159896   1
  -2  -2   4 1781708  159896  -2
  -2  -2  -4 1781708  159896   1
  -2   4  -2 1793724  159864  -2
   4  -2   2 1793724  159864   1
   2   2   4 1700520  159768  -2
   2   2  -4 1700520  159768   1
  -2   2  -4 1750237  159800  -2
   2  -2   4 1750237  159800   1
  -4   2   2 1645177  159864  -2
   2  -4  -2 1645177  159864   1
  -2   2   4 1722168  159896  -2
   2  -2  -4 1722168  159896   1
  -2  -2  -4 1738539  159768  -2
  -2  -2   4 1738539  159768   1
   2  -2   4 1867378  159832  -2
  -2   2  -4 1867378  159832   1
   2   2  -4 1914615  159927  -2
   2   2   4 1914615  159927   1
   4   2  -2 1694258  159896  -2
   2   4   2 1694258  159896   1
  -2   4   2 1706751  159864  -2
   4  -2  -2 1706751  159864   1
   2   4  -2 1570633  159864  -2
   4   2   2 1570633  159864   1
  -4   2  -3   42946    3656  -2
   2  -4   3   42946    3656   1
   2  -3  -4   40022    3656  -2
  -3   2   4   40022    3656   1
  -4  -2   3   35603    3656  -2
  -2  -4  -3   35603    3656   1
  -2   3  -4   41675    3656  -2
   3  -2   4   41675    3656   1
  -3   4  -2   42374    3656  -2
   4  -3   2   42374    3656   1
   4   2   3   38718    3656  -2
   2   4  -3   38718    3656   1
  -3  -4   2   43963    3656  -2
  -4  -3  -2   43963    3656   1
  -4   2  -3   41039    3656  -2
   2  -4   3   41039    3656   1
  -4   2  -3   43041    3656  -2
   2  -4   3   43041    3656   1
  -3  -4  -2   38241    3656  -2
  -4  -3   2   38241    3656   1
  -3  -4  -2   36906    3656  -2
  -4  -3   2   36906    3656   1
   2  -3   4   37479    3656  -2
  -3   2  -4   37479    3656   1
  -2  -3  -4   40975    3656  -2
  -3  -2   4   40975    3656   1
   4  -2   3   38464    3656  -2
  -2   4  -3   38464    3656   1
   4   2  -3   38559    3656  -2
   2   4   3   38559    3656   1
  -4  -2  -3   40498    3656  -2
  -2  -4   3   40498    3656   1
  -4  -2  -3   39831    3656  -2
  -2  -4   3   39831    3656   1
   2  -3   4   37288    3656  -2
  -3   2  -4   37288    3656   1
   4  -2   3   41897    3656  -2
  -2   4  -3   41897    3656   1
   3  -4   2   38305    3656  -2
  -4   3  -2   38305    3656   1
   3  -4   2   37796    3656  -2
  -4   3  -2   37796    3656   1
   3  -4   2   38718    3656  -2
  -4   3  -2   38718    3656   1
  -4  -2  -3   40022    3656  -2
  -2  -4   3   40022    3656   1
   4  -2   3   37860    3656  -2
  -2   4  -3   37860    3656   1
  -3   1  -4   86147    7661  -2
   1  -3   4   86147    7661   1
  -3   1  -4   74862    7661  -2
   1  -3   4   74862    7661   1
  -3   1  -4   83858    7661  -2
   1  -3   4   83858    7661   1
  -1  -4   3   85797    7629  -2
  -4  -1  -3   85797    7629   1
   1  -4  -3   84907    7661  -2
  -4   1   3   84907    7661   1
   4   3   1   74480    7661  -2
   3   4  -1   74480    7661   1
   3  -1  -4   83540    7629  -2
  -1   3   4   83540    7629   1
   3   1   4   92600    7661  -2
   1   3  -4   92600    7661   1
   4  -3  -1   83540    7661  -2
  -3   4   1   83540    7661   1
  -4  -3   1   82491    7661  -2
  -3  -4  -1   82491    7661   1
  -1   4  -3   80679    7661  -2
   4  -1   3   80679    7661   1
  -3  -1   4   78231    7629  -2
  -1  -3  -4   78231    7629   1
   4   3   1   83540    7661  -2
   3   4  -1   83540    7661   1
  -3  -1  -4   91455    7661  -2
  -1  -3   4   91455    7661   1
  -3  -1  -4   87037    7661  -2
  -1  -3   4   87037    7661   1
   4   3  -1   78899    7661  -2
   3   4   1   78899    7661   1
   3  -1   4   83699    7661  -2
  -1   3  -4   83699    7661   1
   3  -1   4   77055    7661  -2
  -1   3  -4   77055    7661   1
   1   4  -3   85733    7661  -2
   4   1   3   85733    7661   1
  -3   1   4   77786    7629  -2
   1  -3  -4   77786    7629   1
   3   1  -4   80488    7629  -2
   1   3   4   80488    7629   1
  -4  -3  -1   82300    7661  -2
  -3  -4   1   82300    7661   1
   4  -3   1   83349    7661  -2
  -3   4  -1   83349    7661   1
   4  -3   1   86941    7661  -2
  -3   4  -1   86941    7661   1
  -3  -1  -4   89675    7661  -2
  -1  -3   4   89675    7661   1
  -1  -4  -3   82841    7661  -2
  -4  -1   3   82841    7661   1
  -3   2  -4   37034    3020  -2
   2  -3   4   37034    3020   1
   3   2   4   29627    3020  -2
   2   3  -4   29627    3020   1
   3  -2  -4   33251    3020  -2
  -2   3   4   33251    3020   1
   2  -4  -3   33441    3020  -2
  -4   2   3   33441    3020   1
   4   3   2   32679    3020  -2
   3   4  -2   32679    3020   1
   4   3   2   31248    3020  -2
   3   4  -2   31248    3020   1
  -3   2  -4   32837    3020  -2
   2  -3   4   32837    3020   1
  -4  -3   2   32297    3020  -2
  -3  -4  -2   32297    3020   1
  -2   4  -3   34999    3020  -2
   4  -2   3   34999    3020   1
  -3   2  -4   36398    3020  -2
   2  -3   4   36398    3020   1
  -2  -4   3   31502    3020  -2
  -4  -2  -3   31502    3020   1
  -2  -4  -3   29245    3020  -2
  -4  -2   3   29245    3020   1
  -3   2   4   33886    3020  -2
   2  -3  -4   33886    3020   1
   2  -4   3   35762    3020  -2
  -4   2  -3   35762    3020   1
   2  -4   3   35921    3020  -2
  -4   2  -3   35921    3020   1
   4   3  -2   32742    3020  -2
   3   4   2   32742    3020   1
  -4  -3  -2   29849    3020  -2
  -3  -4   2   29849    3020   1
  -4  -3  -2   28387    3020  -2
  -3  -4   2   28387    3020   1
  -4  -3  -2   29849    3020  -2
  -3  -4   2   29849    3020   1
   4  -3   2   32265    3020  -2
  -3   4  -2   32265    3020   1
   4  -3   2   35063    3020  -2
  -3   4  -2   35063    3020   1
   4  -3   2   34967    3020  -2
  -3   4  -2   34967    3020   1
   2  -4   3   31661    3020  -2
  -4   2  -3   31661    3020   1
  -3  -2  -4   30835    3020  -2
  -2  -3   4   30835    3020   1
  -3  -2  -4   30263    3020  -2
  -2  -3   4   30263    3020   1
  -3  -2  -4   33982    3020  -2
  -2  -3   4   33982    3020   1
   3  -2   4   32774    3020  -2
  -2   3  -4   32774    3020   1
   3  -2   4   29500    3020  -2
  -2   3  -4   29500    3020   1
   3  -2   4   36366    3020  -2
  -2   3  -4   36366    3020   1
   3   2  -4   31280    3020  -2
   2   3   4   31280    3020   1
  -3  -4   3  121400   10490  -2
  -4  -3  -3  121400   10490   1
  -4   3  -3  108780   10490  -2
   3  -4   3  108780   10490   1
   3  -4  -3  117363   10490  -2
  -4   3   3  117363   10490   1
  -3   4  -3  120542   10522  -2
   4  -3   3  120542   10522   1
   3  -3  -4  124515   10490  -2
  -3   3   4  124515   10490   1
  -3   3  -4  106873   10522  -2
   3  -3   4  106873   10522   1
  -4   3  -3  118253   10522  -2
   3  -4   3  118253   10522   1
   4  -3   3  112308   10490  -2
  -3   4  -3  112308   10490   1
   3  -3   4  103535   10490  -2
  -3   3  -4  103535   10490   1
   4  -3   3  112467   10522  -2
  -3   4  -3  112467   10522   1
   4  -3   3  110051   10490  -2
  -3   4  -3  110051   10490   1
   4  -3   3  108240   10490  -2
  -3   4  -3  108240   10490   1
  -3  -3  -4  107318   10490  -2
  -3  -3   4  107318   10490   1
  -3  -4  -3  121845   10522  -2
  -4  -3   3  121845   10522   1
   3  -3   4  117744   10522  -2
  -3   3  -4  117744   10522   1
   4  -3   3  103376   10522  -2
  -3   4  -3  103376   10522   1
   3  -4   3  115010   10490  -2
  -4   3  -3  115010   10490   1
  -3  -3  -4  112340   10522  -2
  -3  -3   4  112340   10522   1
  -3  -3  -4  118221   10522  -2
  -3  -3   4  118221   10522   1
  -3  -4  -3  126645   10522  -2
  -4  -3   3  126645   10522   1
   3  -4   3  113643   10522  -2
  -4   3  -3  113643   10522   1
   3  -4   3  109702   10490  -2
  -4   3  -3  109702   10490   1
   4   3  -3  109098   10490  -2
   3   4   3  109098   10490   1
   3  -3   4  114534   10522  -2
  -3   3  -4  114534   10522   1
  -4  -3  -3  121654   10490  -2
  -3  -4   3  121654   10490   1
  -4  -3  -3  113485   10522  -2
  -3  -4   3  113485   10522   1
  -4  -3  -3  115710   10522  -2
  -3  -4   3  115710   10522   1
  -4  -4   0  377042   32869  -2
  -4  -4   0  377042   32869   1
   0  -4   4  350117   32901  -2
  -4   0  -4  350117   32901   1
   0  -4  -4  344745   32837  -2
  -4   0   4  344745   32837   1
   4  -4   0  385466   32869  -2
  -4   4   0  385466   32869   1
  -4   0   4  332666   32901  -2
   0  -4  -4  332666   32901   1
  -4   4   0  382033   32869  -2
   4  -4   0  382033   32869   1
   0   4   4  324623   32837  -2
   4   0  -4  324623   32837   1
   0   4  -4  356793   32901  -2
   4   0   4  356793   32901   1
   4   4   0  347479   32869  -2
   4   4   0  347479   32869   1
  -4  -4   1  139869   11984  -2
  -4  -4  -1  139869   11984   1
  -4   1  -4  130618   11984  -2
   1  -4   4  130618   11984   1
  -1   4  -4  126581   11984  -2
   4  -1   4  126581   11984   1
   4   4   1  125977   11984  -2
   4   4  -1  125977   11984   1
   1  -4  -4  133416   11984  -2
  -4   1   4  133416   11984   1
  -4   1  -4  141522   11984  -2
   1  -4   4  141522   11984   1
   4   1   4  120860   11984  -2
   1   4  -4  120860   11984   1
   4   4   1  110528   11984  -2
   4   4  -1  110528   11984   1
   4  -1  -4  135419   11984  -2
  -1   4   4  135419   11984   1
  -4   1  -4  134624   11984  -2
   1  -4   4  134624   11984   1
  -1  -4  -4  140473   11984  -2
  -4  -1   4  140473   11984   1
  -4  -1  -4  121750   11984  -2
  -1  -4   4  121750   11984   1
  -4  -1  -4  132653   11984  -2
  -1  -4   4  132653   11984   1
  -4  -1  -4  134115   11984  -2
  -1  -4   4  134115   11984   1
   4   1  -4  120923   11984  -2
   1   4   4  120923   11984   1
  -4  -4  -1  141585   12016  -2
  -4  -4   1  141585   12016   1
   1  -4   4  131191   11984  -2
  -4   1  -4  131191   11984   1
   4  -1   4  122226   11984  -2
  -1   4  -4  122226   11984   1
   4  -1   4  133861   11984  -2
  -1   4  -4  133861   11984   1
  -4  -4   2 1945132  181543  -2
  -4  -4  -2 1945132  181543   1
  -2  -4   4 1993736  181575  -2
  -4  -2  -4 1993736  181575   1
  -2   4  -4 2024762  181512  -2
   4  -2   4 2024762  181512   1
   2  -4  -4 2109700  181543  -2
  -4   2   4 2109700  181543   1
   4  -4  -2 2050955  181512  -2
  -4   4   2 2050955  181512   1
  -4  -2   4 2019612  181575  -2
  -2  -4  -4 2019612  181575   1
   4  -2  -4 2093107  181543  -2
  -2   4   4 2093107  181543   1
  -4   4  -2 2037382  181448  -2
   4  -4   2 2037382  181448   1
   4   4   2 1903775  181448  -2
   4   4  -2 1903775  181448   1
   2   4   4 1724679  181416  -2
   4   2  -4 1724679  181416   1
  -4   4  -2 2138247  181480  -2
   4  -4   2 2138247  181480   1
  -4   4   2 1825512  181575  -2
   4  -4  -2 1825512  181575   1
  -2   4   4 1962902  181512  -2
   4  -2  -4 1962902  181512   1
   2  -4   4 1978573  181480  -2
  -4   2  -4 1978573  181480   1
  -4   2   4 2009376  181543  -2
   2  -4  -4 2009376  181543   1
   2   4  -4 1820013  181543  -2
   4   2   4 1820013  181543   1
   4   2  -4 1995580  181543  -2
   2   4   4 1995580  181543   1
   4   4  -2 1898244  181512  -2
   4   4   2 1898244  181512   1
  -4  -4   3    6390     540  -2
  -4  -4  -3    6390     540   1
  -4   4  -3    6072     540  -2
   4  -4   3    6072     540   1
  -3  -4   4    6580     540  -2
  -4  -3  -4    6580     540   1
  -3   4  -4    5468     540  -2
   4  -3   4    5468     540   1
   3  -4  -4    5595     540  -2
  -4   3   4    5595     540   1
  -4   3  -4    5722     540  -2
   3  -4   4    5722     540   1
  -4  -3   4    5404     540  -2
  -3  -4  -4    5404     540   1
  -4   3  -4    5372     540  -2
   3  -4   4    5372     540   1
   4  -3  -4    5785     540  -2
  -3   4   4    5785     540   1
   4  -3   4    5499     540  -2
  -3   4  -4    5499     540   1
  -4  -3  -4    5976     540  -2
  -3  -4   4    5976     540   1
   4  -3   4    5182     540  -2
  -3   4  -4    5182     540   1
   3  -4   4    5150     540  -2
  -4   3  -4    5150     540   1
   4  -4   3    6199     540  -2
  -4   4  -3    6199     540   1
   4  -3   4    5086     540  -2
  -3   4  -4    5086     540   1
  -4  -3  -4    6135     572  -2
  -3  -4   4    6135     572   1
   4  -4   3    6294     540  -2
  -4   4  -3    6294     540   1
   4   3  -4    5627     540  -2
   3   4   4    5627     540   1
  -4  -4  -3    5245     540  -2
  -4  -4   3    5245     540   1
  -4  -4  -3    5468     572  -2
  -4  -4   3    5468     572   1
  -4  -4  -3    5340     540  -2
  -4  -4   3    5340     540   1
   4  -4   3    6008     540  -2
  -4   4  -3    6008     540   1
  -3  -4  -4    6294     540  -2
  -4  -3   4    6294     540   1
  -3  -4  -4    5881     540  -2
  -4  -3   4    5881     540   1
   3  -4   4    5086     540  -2
  -4   3  -4    5086     540   1
  -4  -3  -4    6676     540  -2
  -3  -4   4    6676     540   1
  -4  -4   4   21553    1844  -2
  -4  -4  -4   21553    1844   1
   4   4   4   17897    1844  -2
   4   4  -4   17897    1844   1
  -4   4  -4   21108    1876  -2
   4  -4   4   21108    1876   1
   4  -4  -4   21139    1844  -2
  -4   4   4   21139    1844   1
   4  -4   4   20217    1844  -2
  -4   4  -4   20217    1844   1
   4  -4   4   20853    1844  -2
  -4   4  -4   20853    1844   1
   4  -4   4   19168    1876  -2
  -4   4  -4   19168    1876   1
  -4  -4  -4   19804    1844  -2
  -4  -4   4   19804    1844   1
  -4  -4  -4   18596    1876  -2
  -4  -4   4   18596    1876   1
   1   5   1  409625   37987  -2
   5   1  -1  409625   37987   1
  -5  -1   1  411405   37924  -2
  -1  -5  -1  411405   37924   1
   5   1   1  418431   37860  -2
   1   5  -1  418431   37860   1
  -1   1  -5  422214   37892  -2
   1  -1   5  422214   37892   1
   1   1   5  460519   37892  -2
   1   1  -5  460519   37892   1
  -1   5  -1  390711   37955  -2
   5  -1   1  390711   37955   1
   1  -1  -5  396242   37924  -2
  -1   1   5  396242   37924   1
  -1  -1   5  411723   37955  -2
  -1  -1  -5  411723   37955   1
   5  -1  -1  403268   37892  -2
  -1   5   1  403268   37892   1
  -1  -5   1  423453   37987  -2
  -5  -1  -1  423453   37987   1
  -5   1  -1  398436   37860  -2
   1  -5   1  398436   37860   1
  -5   1   1  378949   37892  -2
   1  -5  -1  378949   37892   1
  -1   5   1  418780   37987  -2
   5  -1  -1  418780   37987   1
  -5  -1  -1  404221   37860  -2
  -1  -5   1  404221   37860   1
  -1   5   1  418653   37955  -2
   5  -1  -1  418653   37955   1
  -1  -1  -5  406288   37892  -2
  -1  -1   5  406288   37892   1
   1  -1   5  409848   37892  -2
  -1   1  -5  409848   37892   1
   1   5  -1  412677   37987  -2
   5   1   1  412677   37987   1
   1   1  -5  417286   37955  -2
   1   1   5  417286   37955   1
   5   1  -1  435215   37924  -2
   1   5   1  435215   37924   1
  -1   1   5  406860   37924  -2
   1  -1  -5  406860   37924   1
   5  -1   1  388104   37828  -2
  -1   5  -1  388104   37828   1
   2   5   1   74576    6421  -2
   5   2  -1   74576    6421   1
  -5   1  -2   73558    6421  -2
   1  -5   2   73558    6421   1
  -5  -1   2   76419    6421  -2
  -1  -5  -2   76419    6421   1
  -1   2  -5   61924    6421  -2
   2  -1   5   61924    6421   1
   1   2   5   67836    6421  -2
   2   1  -5   67836    6421   1
  -2   5  -1   65452    6421  -2
   5  -2   1   65452    6421   1
   1  -2  -5   73717    6421  -2
  -2   1   5   73717    6421   1
   5   1   2   76610    6421  -2
   1   5  -2   76610    6421   1
   5  -1  -2   73749    6421  -2
  -1   5   2   73749    6421   1
   2   5   1   76705    6421  -2
   5   2  -1   76705    6421   1
   5   1   2   67995    6421  -2
   1   5  -2   67995    6421   1
  -1   2  -5   65325    6421  -2
   2  -1   5   65325    6421   1
  -1   2  -5   74417    6421  -2
   2  -1   5   74417    6421   1
  -1  -2   5   69013    6421  -2
  -2  -1  -5   69013    6421   1
  -2   5  -1   65961    6421  -2
   5  -2   1   65961    6421   1
  -5   1  -2   65611    6421  -2
   1  -5   2   65611    6421   1
  -5   1  -2   68154    6421  -2
   1  -5   2   68154    6421   1
   5   1   2   72255    6421  -2
   1   5  -2   72255    6421   1
   5   1   2   62941    6421  -2
   1   5  -2   62941    6421   1
   5  -1   2   66374    6421  -2
  -1   5  -2   66374    6421   1
   2   5  -1   69585    6421  -2
   5   2   1   69585    6421   1
   5   1  -2   72128    6421  -2
   1   5   2   72128    6421   1
   5  -1   2   69267    6421  -2
  -1   5  -2   69267    6421   1
  -5  -1  -2   70761    6421  -2
  -1  -5   2   70761    6421   1
   2   5  -1   73590    6421  -2
   5   2   1   73590    6421   1
  -5  -1  -2   69935    6421  -2
  -1  -5   2   69935    6421   1
   5  -1   2   63768    6421  -2
  -1   5  -2   63768    6421   1
   5  -1   2   71492    6421  -2
  -1   5  -2   71492    6421   1
  -1   2   5   66851    6421  -2
   2  -1  -5   66851    6421   1
  -5  -1  -2   70030    6421  -2
  -1  -5   2   70030    6421   1
   2  -5   1   60716    6421  -2
  -5   2  -1   60716    6421   1
  -1  -2  -5   73272    6421  -2
  -2  -1   5   73272    6421   1
   5  -1   2   72478    6421  -2
  -1   5  -2   72478    6421   1
   1  -2   5   68854    6421  -2
  -2   1  -5   68854    6421   1
   1  -3  -5 1050702   91169  -2
  -3   1   5 1050702   91169   1
  -3   5  -1 1035539   91137  -2
   5  -3   1 1035539   91137   1
   3  -5  -1 1015925   91169  -2
  -5   3   1 1015925   91169   1
  -1  -3   5  974728   91169  -2
  -3  -1  -5  974728   91169   1
  -3   5  -1 1006802   91169  -2
   5  -3   1 1006802   91169   1
  -3  -5   1  974918   91169  -2
  -5  -3  -1  974918   91169   1
  -1   3  -5  933435   91105  -2
   3  -1   5  933435   91105   1
  -5  -1   3  990177   91169  -2
  -1  -5  -3  990177   91169   1
   1   3   5 1001780   91105  -2
   3   1  -5 1001780   91105   1
   3   5   1  971199   91137  -2
   5   3  -1  971199   91137   1
   5  -1  -3 1044312   91169  -2
  -1   5   3 1044312   91169   1
   3   5  -1  872846   91137  -2
   5   3   1  872846   91137   1
  -3  -5  -1 1086496   91169  -2
  -5  -3   1 1086496   91169   1
  -3   5   1  995581   91169  -2
   5  -3  -1  995581   91169   1
  -1  -3  -5  960677   91074  -2
  -3  -1   5  960677   91074   1
  -1   3   5  953779   91137  -2
   3  -1  -5  953779   91137   1
   1  -3   5  943130   91105  -2
  -3   1  -5  943130   91105   1
   5   1  -3 1127185   91201  -2
   1   5   3 1127185   91201   1
   1   3  -5  921132   91169  -2
   3   1   5  921132   91169   1
  -5   1   3  941858   91137  -2
   1  -5  -3  941858   91137   1
  -1   4  -5    1335     159  -2
   4  -1   5    1335     159   1
  -5   1  -4    1462     159  -2
   1  -5   4    1462     159   1
   5  -1  -4    1494     159  -2
  -1   5   4    1494     159   1
  -1  -4   5    1272     159  -2
  -4  -1  -5    1272     159   1
   5   1   4    1558     159  -2
   1   5  -4    1558     159   1
  -5  -1   4    1717     159  -2
  -1  -5  -4    1717     159   1
  -5   1  -4    1335     159  -2
   1  -5   4    1335     159   1
   5   1   4    1748     191  -2
   1   5  -4    1748     191   1
  -5   1  -4    1367     159  -2
   1  -5   4    1367     159   1
   5   1   4    1717     159  -2
   1   5  -4    1717     159   1
  -5  -1  -4    1685     159  -2
  -1  -5   4    1685     159   1
   5  -1   4    1589     191  -2
  -1   5  -4    1589     191   1
  -5   1   4    1685     159  -2
   1  -5  -4    1685     159   1
   5  -1   4    1303     159  -2
  -1   5  -4    1303     159   1
  -1  -4  -5    1431     159  -2
  -4  -1   5    1431     159   1
   4  -5   1    1240     159  -2
  -5   4  -1    1240     159   1
  -5  -1  -4    1780     159  -2
  -1  -5   4    1780     159   1
  -5  -1  -4    1621     159  -2
  -1  -5   4    1621     159   1
   5  -1   4    1335     159  -2
  -1   5  -4    1335     159   1
   2   5   0    1272     159   1
   2   5   0    1717     159   1
  -2  -5   0    1748     159   1
  -2   5   0    1303     159   1
   2   5   0    1303     159   1
  -2   5   0    1399     127   1
   0  -2  -5    1462     159   1
   0  -2   5    1431     159   1
   0  -2   5    1208     159   1
   0   2  -5    1558     159   1
   0   2   5    1303     159   1
   2   5   0    1399     159   1
   5   0   2    1526     159   1
  -2   5   0    1367     159   1
   5   2   1  151249   12270  -2
   2   5  -1  151249   12270   1
  -5  -2   1  128107   12270  -2
  -2  -5  -1  128107   12270   1
  -5   2  -1  140250   12302  -2
   2  -5   1  140250   12302   1
  -2   1  -5  124007   12302  -2
   1  -2   5  124007   12302   1
  -2   1  -5  149787   12302  -2
   1  -2   5  149787   12302   1
   2   1   5  115742   12302  -2
   1   2  -5  115742   12302   1
   5   2   1  143016   12270  -2
   2   5  -1  143016   12270   1
   2  -1  -5  141427   12270  -2
  -1   2   5  141427   12270   1
   5  -2  -1  123593   12302  -2
  -2   5   1  123593   12302   1
  -5  -2  -1  143334   12270  -2
  -2  -5   1  143334   12270   1
  -2  -1  -5  124738   12270  -2
  -1  -2   5  124738   12270   1
  -2   1   5  123943   12270  -2
   1  -2  -5  123943   12270   1
  -5  -2  -1  143843   12302  -2
  -2  -5   1  143843   12302   1
   5   2  -1  129760   12302  -2
   2   5   1  129760   12302   1
   5  -2   1  116314   12302  -2
  -2   5  -1  116314   12302   1
   5  -2   1  134719   12302  -2
  -2   5  -1  134719   12302   1
  -2  -1  -5  137612   12270  -2
  -1  -2   5  137612   12270   1
  -2   2  -5   19073    1558  -2
   2  -2   5   19073    1558   1
  -2   2  -5   19137    1558  -2
   2  -2   5   19137    1558   1
   2   2   5   16657    1558  -2
   2   2  -5   16657    1558   1
  -2   2  -5   18024    1558  -2
   2  -2   5   18024    1558   1
  -2  -5   2   16657    1558  -2
  -5  -2  -2   16657    1558   1
   5   2   2   15131    1558  -2
   2   5  -2   15131    1558   1
  -5  -2   2   16180    1558  -2
  -2  -5  -2   16180    1558   1
   5   2   2   14941    1558  -2
   2   5  -2   14941    1558   1
  -2   5  -2   19168    1558  -2
   5  -2   2   19168    1558   1
  -5   2  -2   19200    1558  -2
   2  -5   2   19200    1558   1
  -5   2  -2   18342    1558  -2
   2  -5   2   18342    1558   1
   2  -2  -5   17261    1558  -2
  -2   2   5   17261    1558   1
   5   2   2   15258    1558  -2
   2   5  -2   15258    1558   1
  -2  -5  -2   16053    1558  -2
  -5  -2   2   16053    1558   1
   2   2  -5   13955    1558  -2
   2   2   5   13955    1558   1
   2  -5   2   16689    1558  -2
  -5   2  -2   16689    1558   1
  -2  -2  -5   17706    1558  -2
  -2  -2   5   17706    1558   1
   2  -2   5   18819    1558  -2
  -2   2  -5   18819    1558   1
  -5  -2  -2   15417    1558  -2
  -2  -5   2   15417    1558   1
   5  -2   2   19327    1558  -2
  -2   5  -2   19327    1558   1
  -5  -2  -2   14400    1558  -2
  -2  -5   2   14400    1558   1
   5   2  -2   15036    1558  -2
   2   5   2   15036    1558   1
   5  -2   2   18024    1558  -2
  -2   5  -2   18024    1558   1
   5  -2   2   17992    1558  -2
  -2   5  -2   17992    1558   1
  -2   2   5   14750    1558  -2
   2  -2  -5   14750    1558   1
   2   5  -2   14877    1558  -2
   5   2   2   14877    1558   1
   2   3   5    3846     350  -2
   3   2  -5    3846     350   1
  -3   5  -2    3401     350  -2
   5  -3   2    3401     350   1
  -2   3  -5    3147     350  -2
   3  -2   5    3147     350   1
  -5   2  -3    3497     318  -2
   2  -5   3    3497     318   1
  -3  -5   2    3624     318  -2
  -5  -3  -2    3624     318   1
  -2  -3   5    2734     318  -2
  -3  -2  -5    2734     318   1
  -5   2  -3    3433     318  -2
   2  -5   3    3433     318   1
  -2  -3  -5    3846     350  -2
  -3  -2   5    3846     350   1
   3  -5   2    3338     350  -2
  -5   3  -2    3338     350   1
   3  -5   2    3497     318  -2
  -5   3  -2    3497     318   1
   5  -2   3    3370     318  -2
  -2   5  -3    3370     318   1
   5  -2   3    3719     350  -2
  -2   5  -3    3719     350   1
   2  -3   5    2893     318  -2
  -3   2  -5    2893     318   1
   2  -3   5    3338     318  -2
  -3   2  -5    3338     318   1
  -5   2  -4    1272     159  -2
   2  -5   4    1272     159   1
  -5  -2   4     985     127  -2
  -2  -5  -4     985     127   1
   4   5   2    1049     127  -2
   5   4  -2    1049     127   1
  -2   4  -5    1272     127  -2
   4  -2   5    1272     127   1
   2  -4  -5    1367     127  -2
  -4   2   5    1367     127   1
   5  -2  -4     827     127  -2
  -2   5   4     827     127   1
  -5   2  -4    1399     127  -2
   2  -5   4    1399     127   1
  -5   2  -4    1113     127  -2
   2  -5   4    1113     127   1
  -2  -4  -5     922     127  -2
  -4  -2   5     922     127   1
   2  -4   5    1144     127  -2
  -4   2  -5    1144     127   1
   5  -2   4    1113     127  -2
  -2   5  -4    1113     127   1
   4  -5   2    1303     127  -2
  -5   4  -2    1303     127   1
  -5  -2  -4    1017     127  -2
  -2  -5   4    1017     127   1
   5  -2   4    1272     127  -2
  -2   5  -4    1272     127   1
  -4  -5  -2     922     159  -2
  -5  -4   2     922     159   1
   5   2  -4     922     127  -2
   2   5   4     922     127   1
   4  -5   2    1431     127  -2
  -5   4  -2    1431     127   1
   5  -2   4    1208     159  -2
  -2   5  -4    1208     159   1
   4  -5   2    1081     127  -2
  -5   4  -2    1081     127   1
  -5  -2  -4    1017     159  -2
  -2  -5   4    1017     159   1
  -5  -2  -4    1081     127  -2
  -2  -5   4    1081     127   1
  -5  -3   1  945546   85829  -2
  -3  -5  -1  945546   85829   1
  -1  -5   3  929874   85860  -2
  -5  -1  -3  929874   85860   1
   3   1   5 1000222   85670  -2
   1   3  -5 1000222   85670   1
   5  -3  -1  843791   85765  -2
  -3   5   1  843791   85765   1
  -3  -1   5  971294   85860  -2
  -1  -3  -5  971294   85860   1
  -5   3  -1  937980   85765  -2
   3  -5   1  937980   85765   1
   1   5   3  934388   85797  -2
   5   1  -3  934388   85797   1
   5   3   1  860989   85765  -2
   3   5  -1  860989   85765   1
   1  -5  -3  915633   85829  -2
  -5   1   3  915633   85829   1
   3  -1  -5  961313   85860  -2
  -1   3   5  961313   85860   1
  -1   5  -3  860544   85829  -2
   5  -1   3  860544   85829   1
  -3   1  -5  987697   85702  -2
   1  -3   5  987697   85702   1
  -1   5   3  930128   85829  -2
   5  -1  -3  930128   85829   1
   3  -1   5  945133   85702  -2
  -1   3  -5  945133   85702   1
   1  -5   3  961281   85860  -2
  -5   1  -3  961281   85860   1
   5   3  -1  904857   85797  -2
   3   5   1  904857   85797   1
   5  -3   1  947835   85765  -2
  -3   5  -1  947835   85765   1
  -3   1   5  954605   85860  -2
   1  -3  -5  954605   85860   1
  -5   3   1  866997   85797  -2
   3  -5  -1  866997   85797   1
  -3  -1  -5  937726   85670  -2
  -1  -3   5  937726   85670   1
  -5  -3  -1  979814   85765  -2
  -3  -5   1  979814   85765   1
   1   5  -3  927967   85860  -2
   5   1   3  927967   85860   1
  -2  -5   3  378123   34204  -2
  -5  -2  -3  378123   34204   1
   2  -5  -3  385403   34173  -2
  -5   2   3  385403   34173   1
  -3  -2   5  345953   34173  -2
  -2  -3  -5  345953   34173   1
   5  -3  -2  383050   34141  -2
  -3   5   2  383050   34141   1
  -3   2  -5  336035   34014  -2
   2  -3   5  336035   34014   1
   3   2   5  386324   34014  -2
   2   3  -5  386324   34014   1
   3  -2  -5  366012   34173  -2
  -2   3   5  366012   34173   1
   5   3   2  349863   34045  -2
   3   5  -2  349863   34045   1
  -5  -3   2  352025   34141  -2
  -3  -5  -2  352025   34141   1
   2   5   3  372941   34141  -2
   5   2  -3  372941   34141   1
  -2   5  -3  324718   34109  -2
   5  -2   3  324718   34109   1
  -2   5   3  362165   34141  -2
   5  -2  -3  362165   34141   1
   2   5  -3  366933   34173  -2
   5   2   3  366933   34173   1
  -3   2   5  356030   34141  -2
   2  -3  -5  356030   34141   1
   2  -5   3  350499   34173  -2
  -5   2  -3  350499   34173   1
   3   2  -5  412168   34204  -2
   2   3   5  412168   34204   1
  -5   3   2  407114   34173  -2
   3  -5  -2  407114   34173   1
   5   3  -2  404062   34173  -2
   3   5   2  404062   34173   1
  -5  -3  -2  369190   34045  -2
  -3  -5   2  369190   34045   1
   3  -2   5  377678   34045  -2
  -2   3  -5  377678   34045   1
   3  -5  -3  489764   47333  -2
  -5   3   3  489764   47333   1
  -5  -3   3  494628   47365  -2
  -3  -5  -3  494628   47365   1
  -3  -3   5  514114   47396  -2
  -3  -3  -5  514114   47396   1
   5   3   3  517197   47206  -2
   3   5  -3  517197   47206   1
   3   5   3  506294   47301  -2
   5   3  -3  506294   47301   1
   5  -3  -3  500000   47333  -2
  -3   5   3  500000   47333   1
  -3  -5   3  514400   47396  -2
  -5  -3  -3  514400   47396   1
   3   5   3  550384   47269  -2
   5   3  -3  550384   47269   1
  -5   3  -3  506612   47206  -2
   3  -5   3  506612   47206   1
  -5   3  -3  550861   47238  -2
   3  -5   3  550861   47238   1
  -3   3  -5  534236   47238  -2
   3  -3   5  534236   47238   1
   3   3   5  481562   47206  -2
   3   3  -5  481562   47206   1
  -3   5  -3  496916   47301  -2
   5  -3   3  496916   47301   1
   3  -3  -5  501176   47333  -2
  -3   3   5  501176   47333   1
  -5   3   3  498983   47333  -2
   3  -5  -3  498983   47333   1
   3   5  -3  467194   47333  -2
   5   3   3  467194   47333   1
  -3   3   5  497774   47333  -2
   3  -3  -5  497774   47333   1
  -3   5   3  535444   47365  -2
   5  -3  -3  535444   47365   1
   3  -3   5  562241   47269  -2
  -3   3  -5  562241   47269   1
   5   3  -3  550130   47365  -2
   3   5   3  550130   47365   1
   3   3  -5  494182   47365  -2
   3   3   5  494182   47365   1
   4   5   3   21330    1939  -2
   5   4  -3   21330    1939   1
  -3   4  -5   21076    1939  -2
   4  -3   5   21076    1939   1
   5   3   4   17706    1907  -2
   3   5  -4   17706    1907   1
  -5   3  -4   20599    1939  -2
   3  -5   4   20599    1939   1
  -5   3  -4   20790    1939  -2
   3  -5   4   20790    1939   1
  -5   3  -4   21902    1939  -2
   3  -5   4   21902    1939   1
   4  -5  -3   20058    1907  -2
  -5   4   3   20058    1907   1
   3   4   5   19709    1907  -2
   4   3  -5   19709    1907   1
  -5  -3   4   22856    1939  -2
  -3  -5  -4   22856    1939   1
   3  -4  -5   23492    1939  -2
  -4   3   5   23492    1939   1
  -4   5  -3   19137    1939  -2
   5  -4   3   19137    1939   1
   5  -3   4   18946    1939  -2
  -3   5  -4   18946    1939   1
  -4  -5  -3   22029    1907  -2
  -5  -4   3   22029    1907   1
   5  -3   4   22729    1907  -2
  -3   5  -4   22729    1907   1
   5  -3   4   21934    1907  -2
  -3   5  -4   21934    1907   1
   5  -3   4   19995    1939  -2
  -3   5  -4   19995    1939   1
   5   3  -4   20345    1939  -2
   3   5   4   20345    1939   1
  -4  -5  -3   20980    1939  -2
  -5  -4   3   20980    1939   1
   5  -3   4   19454    1939  -2
  -3   5  -4   19454    1939   1
   3  -4   5   21266    1939  -2
  -4   3  -5   21266    1939   1
   4  -5   3   19232    1939  -2
  -5   4  -3   19232    1939   1
  -5  -3  -4   20599    1939  -2
  -3  -5   4   20599    1939   1
  -5  -3  -4   20567    1939  -2
  -3  -5   4   20567    1939   1
   3  -4   5   20980    1939  -2
  -4   3  -5   20980    1939   1
  -3  -4  -5   22602    1939  -2
  -4  -3   5   22602    1939   1
   4  -5   3   20345    1939  -2
  -5   4  -3   20345    1939   1
   4  -5   3   20980    1939  -2
  -5   4  -3   20980    1939   1
   0   4   5      32      32   1
   4   5   0      95      32   1
  -4  -5   0      64      64   1
  -4   5   0       0      32   1
  -5   0   4      64      64   1
   5   0   4      64      64   1
  -4   5   0      32      32   1
   4   5   0      64      32   1
   4   5   0      64      32   1
   0  -4  -5      95      32   1
   0  -4   5      64      64   1
   0  -4   5      32      64   1
   0  -4   5      32      32   1
   0   4  -5      95      64   1
  -1   5  -4    2098     191  -2
   5  -1   4    2098     191   1
   5   4   1    1844     191  -2
   4   5  -1    1844     191   1
   5   4   1    1748     191  -2
   4   5  -1    1748     191   1
   4  -1  -5    1780     191  -2
  -1   4   5    1780     191   1
  -5  -4   1    1907     223  -2
  -4  -5  -1    1907     223   1
  -1  -5   4    1780     191  -2
  -5  -1  -4    1780     191   1
  -4   1  -5    2257     223  -2
   1  -4   5    2257     223   1
  -4   1  -5    2193     223  -2
   1  -4   5    2193     223   1
   4   1   5    1971     223  -2
   1   4  -5    1971     223   1
  -4   1  -5    2257     223  -2
   1  -4   5    2257     223   1
   5   4   1    1844     191  -2
   4   5  -1    1844     191   1
   1  -5  -4    2098     223  -2
  -5   1   4    2098     223   1
  -4  -1   5    1939     191  -2
  -1  -4  -5    1939     191   1
   5  -4  -1    1907     223  -2
  -4   5   1    1907     223   1
   5  -4  -1    2003     191  -2
  -4   5   1    2003     191   1
   4  -1   5    2130     223  -2
  -1   4  -5    2130     223   1
   1  -5   4    2098     191  -2
  -5   1  -4    2098     191   1
   5  -4   1    2225     223  -2
  -4   5  -1    2225     223   1
   1   5  -4    1939     191  -2
   5   1   4    1939     191   1
  -4  -1  -5    1812     191  -2
  -1  -4   5    1812     191   1
   4  -1   5    2130     223  -2
  -1   4  -5    2130     223   1
   4   1  -5    1971     191  -2
   1   4   5    1971     191   1
   5  -4   1    2034     191  -2
  -4   5  -1    2034     191   1
  -4  -1  -5    1748     223  -2
  -1  -4   5    1748     223   1
  -4  -1  -5    1844     223  -2
  -1  -4   5    1844     223   1
  -1  -5  -4    1748     223  -2
  -5  -1   4    1748     223   1
  -4   1   5    2034     191  -2
   1  -4  -5    2034     191   1
   5  -4   1    2162     223  -2
  -4   5  -1    2162     223   1
  -4   2  -5   15958    1399  -2
   2  -4   5   15958    1399   1
   5   4   2   13097    1399  -2
   4   5  -2   13097    1399   1
   2   5   4   12811    1399  -2
   5   2  -4   12811    1399   1
   4  -2  -5   15227    1367  -2
  -2   4   5   15227    1367   1
   5   4   2   14527    1399  -2
   4   5  -2   14527    1399   1
   5   4   2   14082    1399  -2
   4   5  -2   14082    1399   1
  -5  -4   2   14686    1399  -2
  -4  -5  -2   14686    1399   1
  -2  -5   4   15099    1367  -2
  -5  -2  -4   15099    1367   1
   2  -5  -4   16148    1399  -2
  -5   2   4   16148    1399   1
  -4   2  -5   16212    1399  -2
   2  -4   5   16212    1399   1
  -4  -2   5   15290    1399  -2
  -2  -4  -5   15290    1399   1
   4   2   5   14654    1399  -2
   2   4  -5   14654    1399   1
   5   4   2   14241    1399  -2
   4   5  -2   14241    1399   1
   5  -4  -2   14400    1399  -2
  -4   5   2   14400    1399   1
  -4   2  -5   16880    1399  -2
   2  -4   5   16880    1399   1
  -5  -4  -2   15608    1399  -2
  -4  -5   2   15608    1399   1
   5  -4   2   16530    1399  -2
  -4   5  -2   16530    1399   1
   5  -4   2   15672    1399  -2
  -4   5  -2   15672    1399   1
   2  -5   4   16117    1399  -2
  -5   2  -4   16117    1399   1
  -5  -4  -2   14178    1399  -2
  -4  -5   2   14178    1399   1
   5  -4   2   15322    1399  -2
  -4   5  -2   15322    1399   1
  -2  -5  -4   13288    1399  -2
  -5  -2   4   13288    1399   1
   2  -5   4   16911    1399  -2
  -5   2  -4   16911    1399   1
  -4   2   5   13605    1367  -2
   2  -4  -5   13605    1367   1
   4   2  -5   14178    1399  -2
   2   4   5   14178    1399   1
   4  -2   5   15258    1399  -2
  -2   4  -5   15258    1399   1
   5   4  -2   13605    1399  -2
   4   5   2   13605    1399   1
  -4  -2  -5   14527    1399  -2
  -2  -4   5   14527    1399   1
  -4  -2  -5   15258    1399  -2
  -2  -4   5   15258    1399   1
  -4  -2  -5   13892    1399  -2
  -2  -4   5   13892    1399   1
   4  -2   5   16117    1399  -2
  -2   4  -5   16117    1399   1
   3   5   4     668      95  -2
   5   3  -4     668      95   1
  -3   5  -4     731      95  -2
   5  -3   4     731      95   1
  -3  -5   4     604      95  -2
  -5  -3  -4     604      95   1
  -4   3  -5     827      95  -2
   3  -4   5     827      95   1
  -5   4  -3     763      95  -2
   4  -5   3     763      95   1
   5   4   3     572      95  -2
   4   5  -3     572      95   1
   5   4   3     731      95  -2
   4   5  -3     731      95   1
   5   4   3     604      95  -2
   4   5  -3     604      95   1
   4   3   5     604      95  -2
   3   4  -5     604      95   1
  -4   3  -5     699      95  -2
   3  -4   5     699      95   1
  -4   3  -5     636      95  -2
   3  -4   5     636      95   1
  -5  -4   3     763      95  -2
  -4  -5  -3     763      95   1
   5  -4   3     668      95  -2
  -4   5  -3     668      95   1
   5  -4   3     763      95  -2
  -4   5  -3     763      95   1
   5   4  -3     699      95  -2
   4   5   3     699      95   1
  -5  -4  -3     572     127  -2
  -4  -5   3     572     127   1
  -4  -3  -5     572      95  -2
  -3  -4   5     572      95   1
  -4  -3  -5     636     127  -2
  -3  -4   5     636     127   1
   4  -3   5     795     127  -2
  -3   4  -5     795     127   1
   4  -3   5     699      95  -2
  -3   4  -5     699      95   1
   4  -3   5     795      95  -2
  -3   4  -5     795      95   1
   5  -4   3     699     127  -2
  -4   5  -3     699     127   1
  -3  -5  -4     858      95  -2
  -5  -3   4     858      95   1
   3  -5   4     699      95  -2
  -5   3  -4     699      95   1
   3  -5   4     604      95  -2
  -5   3  -4     604      95   1
   3  -5   4     604      95  -2
  -5   3  -4     604      95   1
  -4  -5   4     540      64  -2
  -5  -4  -4     540      64   1
  -4   4  -5     540      95  -2
   4  -4   5     540      95   1
  -4   5  -4     636      95  -2
   5  -4   4     636      95   1
  -5  -4   4     604      95  -2
  -4  -5  -4     604      95   1
   4   4   5     763      95  -2
   4   4  -5     763      95   1
   4  -4  -5     540      64  -2
  -4   4   5     540      64   1
   5   4   4     668      95  -2
   4   5  -4     668      95   1
   4   5   4     636      95  -2
   5   4  -4     636      95   1
  -5   4  -4     572      95  -2
   4  -5   4     572      95   1
   5  -4   4     477      95  -2
  -4   5  -4     477      95   1
  -4  -5  -4     604      95  -2
  -5  -4   4     604      95   1
   5  -4   4     413      95  -2
  -4   5  -4     413      95   1
  -5  -4  -4     858     127  -2
  -4  -5   4     858     127   1
  -4  -4  -5     636      95  -2
  -4  -4   5     636      95   1
  -4  -4  -5     636     127  -2
  -4  -4   5     636     127   1
   4  -4   5     795     127  -2
  -4   4  -5     795     127   1
   5  -4   4     509      95  -2
  -4   5  -4     509      95   1
   5   4  -4     668      95  -2
   4   5   4     668      95   1
   4  -5   4     668      95  -2
  -5   4  -4     668      95   1
   4  -5   4     509      95  -2
  -5   4  -4     509      95   1
   4  -5   4     540      95  -2
  -5   4  -4     540      95   1
   4  -4   5     509      95  -2
  -4   4  -5     509      95   1
   4  -4   5     477      95  -2
  -4   4  -5     477      95   1
  -4  -5  -4     445      95  -2
  -5  -4   4     445      95   1
  -5  -5   1   44281    3974  -2
  -5  -5  -1   44281    3974   1
   5  -5  -1   41929    3974  -2
  -5   5   1   41929    3974   1
  -5   1  -5   44313    3974  -2
   1  -5   5   44313    3974   1
  -1   5  -5   46030    3974  -2
   5  -1   5   46030    3974   1
   1   5   5   42883    3942  -2
   5   1  -5   42883    3942   1
  -5  -1   5   44504    3942  -2
  -1  -5  -5   44504    3942   1
   1  -5  -5   43995    3974  -2
  -5   1   5   43995    3974   1
   5   5   1   42469    3942  -2
   5   5  -1   42469    3942   1
   5   5   1   46284    3974  -2
   5   5  -1   46284    3974   1
  -5   1  -5   42596    3974  -2
   1  -5   5   42596    3974   1
   5  -1  -5   43645    3974  -2
  -1   5   5   43645    3974   1
  -5   1  -5   45934    3974  -2
   1  -5   5   45934    3974   1
   5   5   1   41230    3942  -2
   5   5  -1   41230    3942   1
   5   1   5   40657    3974  -2
   1   5  -5   40657    3974   1
   5  -1   5   42755    3974  -2
  -1   5  -5   42755    3974   1
   5  -1   5   42883    3974  -2
  -1   5  -5   42883    3974   1
  -5  -1  -5   41897    3974  -2
  -1  -5   5   41897    3974   1
  -5   1   5   41007    3942  -2
   1  -5  -5   41007    3942   1
  -5  -5  -1   44567    3974  -2
  -5  -5   1   44567    3974   1
   1  -5   5   49622    3974  -2
  -5   1  -5   49622    3974   1
   5  -5   1   44758    3942  -2
  -5   5  -1   44758    3942   1
   1  -5   5   46538    3942  -2
  -5   1  -5   46538    3942   1
  -5  -1  -5   36175    3974  -2
  -1  -5   5   36175    3974   1
  -1   5   5   40880    3942  -2
   5  -1  -5   40880    3942   1
   5  -1   5   44885    3974  -2
  -1   5  -5   44885    3974   1
  -1  -5  -5   38782    3974  -2
  -5  -1   5   38782    3974   1
   1   5  -5   41325    3974  -2
   5   1   5   41325    3974   1
   5   1  -5   41166    3942  -2
   1   5   5   41166    3942   1
  -5  -1  -5   40149    3974  -2
  -1  -5   5   40149    3974   1
   5  -5   1   38718    3974  -2
  -5   5  -1   38718    3974   1
   5  -5   1   42151    3974  -2
  -5   5  -1   42151    3974   1
   5   5  -1   44345    3942  -2
   5   5   1   44345    3942   1
  -5  -5   2   18692    1748  -2
  -5  -5  -2   18692    1748   1
  -2   5  -5   19168    1748  -2
   5  -2   5   19168    1748   1
   2   5   5   17134    1748  -2
   5   2  -5   17134    1748   1
   5   5   2   19899    1748  -2
   5   5  -2   19899    1748   1
   2  -5  -5   20917    1748  -2
  -5   2   5   20917    1748   1
   5   5   2   18946    1748  -2
   5   5  -2   18946    1748   1
  -5   2  -5   18660    1748  -2
   2  -5   5   18660    1748   1
  -5  -2   5   20217    1748  -2
  -2  -5  -5   20217    1748   1
   5   5   2   19804    1748  -2
   5   5  -2   19804    1748   1
   5   2   5   17643    1748  -2
   2   5  -5   17643    1748   1
   5  -2  -5   17166    1748  -2
  -2   5   5   17166    1748   1
   5   2   5   18215    1748  -2
   2   5  -5   18215    1748   1
  -5   2  -5   18501    1748  -2
   2  -5   5   18501    1748   1
  -5   2  -5   19645    1748  -2
   2  -5   5   19645    1748   1
   5  -5   2   18564    1748  -2
  -5   5  -2   18564    1748   1
   2  -5   5   19709    1748  -2
  -5   2  -5   19709    1748   1
   5  -2   5   18533    1748  -2
  -2   5  -5   18533    1748   1
   5   2  -5   19486    1748  -2
   2   5   5   19486    1748   1
  -5   2   5   17706    1748  -2
   2  -5  -5   17706    1748   1
  -5  -2  -5   19200    1748  -2
  -2  -5   5   19200    1748   1
   5  -5   2   18374    1748  -2
  -5   5  -2   18374    1748   1
  -5  -5  -2   19582    1780  -2
  -5  -5   2   19582    1780   1
   5  -2   5   17992    1748  -2
  -2   5  -5   17992    1748   1
   2  -5   5   19772    1748  -2
  -5   2  -5   19772    1748   1
  -5  -2  -5   18406    1748  -2
  -2  -5   5   18406    1748   1
   5  -2   5   19899    1780  -2
  -2   5  -5   19899    1780   1
   5  -5   2   18406    1748  -2
  -5   5  -2   18406    1748   1
  -5  -5   3   32869    3084  -2
  -5  -5  -3   32869    3084   1
   5   5   3   34427    3084  -2
   5   5  -3   34427    3084   1
   5   5   3   34840    3084  -2
   5   5  -3   34840    3084   1
  -3  -5   5   32170    3052  -2
  -5  -3  -5   32170    3052   1
   3   5   5   30739    3084  -2
   5   3  -5   30739    3084   1
   3  -5  -5   35253    3084  -2
  -5   3   5   35253    3084   1
  -3   5  -5   35698    3084  -2
   5  -3   5   35698    3084   1
   5  -5  -3   31598    3052  -2
  -5   5   3   31598    3052   1
  -5   5  -3   36747    3084  -2
   5  -5   3   36747    3084   1
   5   5   3   32774    3084  -2
   5   5  -3   32774    3084   1
   5   3   5   32138    3084  -2
   3   5  -5   32138    3084   1
  -5   3  -5   34300    3084  -2
   3  -5   5   34300    3084   1
  -5   3  -5   35412    3084  -2
   3  -5   5   35412    3084   1
  -5  -3  -5   30485    3084  -2
  -3  -5   5   30485    3084   1
   5   3  -5   38083    3084  -2
   3   5   5   38083    3084   1
   5  -3   5   33855    3084  -2
  -3   5  -5   33855    3084   1
   5  -3   5   32488    3084  -2
  -3   5  -5   32488    3084   1
  -5  -3  -5   32806    3084  -2
  -3  -5   5   32806    3084   1
   5  -5   3   35190    3084  -2
  -5   5  -3   35190    3084   1
   3  -5   5   32869    3084  -2
  -5   3  -5   32869    3084   1
   3  -5   5   34014    3084  -2
  -5   3  -5   34014    3084   1
   5  -3   5   30453    3084  -2
  -3   5  -5   30453    3084   1
   5  -5   3   32074    3084  -2
  -5   5  -3   32074    3084   1
   5  -5   3   31280    3084  -2
  -5   5  -3   31280    3084   1
  -5  -5  -3   31725    3084  -2
  -5  -5   3   31725    3084   1
  -5  -5  -3   31121    3084  -2
  -5  -5   3   31121    3084   1
   5   5   4    3942     318  -2
   5   5  -4    3942     318   1
  -4   5  -5    2829     350  -2
   5  -4   5    2829     350   1
   4   5   5    4037     318  -2
   5   4  -5    4037     318   1
   4  -5  -5    3529     318  -2
  -5   4   5    3529     318   1
  -5   4  -5    3179     350  -2
   4  -5   5    3179     350   1
   5  -5  -4    3433     350  -2
  -5   5   4    3433     350   1
  -5  -4   5    3656     318  -2
  -4  -5  -5    3656     318   1
   4   5   5    4133     318  -2
   5   4  -5    4133     318   1
   5  -4  -5    3338     350  -2
  -4   5   5    3338     350   1
   5   4   5    3370     318  -2
   4   5  -5    3370     318   1
   5   5   4    3052     318  -2
   5   5  -4    3052     318   1
  -5   5  -4    3115     350  -2
   5  -5   4    3115     350   1
   5  -5   4    3338     318  -2
  -5   5  -4    3338     318   1
   5   4  -5    3783     318  -2
   4   5   5    3783     318   1
   5  -4   5    3211     350  -2
  -4   5  -5    3211     350   1
   5  -4   5    3338     350  -2
  -4   5  -5    3338     350   1
   5  -4   5    3052     318  -2
  -4   5  -5    3052     318   1
  -5  -4  -5    3465     413  -2
  -4  -5   5    3465     413   1
   4  -5   5    3147     350  -2
  -5   4  -5    3147     350   1
   4  -5   5    2861     318  -2
  -5   4  -5    2861     318   1
   4  -5   5    2893     318  -2
  -5   4  -5    2893     318   1
  -5  -4  -5    3942     350  -2
  -4  -5   5    3942     350   1
   5  -5   4    3147     350  -2
  -5   5  -4    3147     350   1
   5  -5   4    3147     350  -2
  -5   5  -4    3147     350   1
  -5  -5  -4    3815     318  -2
  -5  -5   4    3815     318   1
  -5  -5   5   92155    7915  -2
  -5  -5  -5   92155    7915   1
   5   5   5   94507    7915  -2
   5   5  -5   94507    7915   1
   5   5   5   86878    7915  -2
   5   5  -5   86878    7915   1
  -5   5  -5   83063    7947  -2
   5  -5   5   83063    7947   1
   5  -5  -5   82364    7915  -2
  -5   5   5   82364    7915   1
   5  -5  -5   92377    7915  -2
  -5   5   5   92377    7915   1
   5  -5   5   79280    7915  -2
  -5   5  -5   79280    7915   1
  -5  -5  -5   86019    7915  -2
  -5  -5   5   86019    7915   1
   5  -5   5   81823    7947  -2
  -5   5  -5   81823    7947   1
   5  -5   5   86433    7915  -2
  -5   5  -5   86433    7915   1
   5  -5   5   81696    7915  -2
  -5   5  -5   81696    7915   1
   0  -6   0    8011     795  -2
  -6   0   0    8011     795   1
  -6   0   0    8615     827  -2
   0  -6   0    8615     827   1
  -6   0   0    9123     795  -2
   0  -6   0    9123     795   1
   0   0   6    8233     827  -2
   0   0  -6    8233     827   1
   0   0  -6    8742     827  -2
   0   0   6    8742     827   1
   6   0   0    8646     827  -2
   0   6   0    8646     827   1
   6   0   0    8201     827  -2
   0   6   0    8201     827   1
   0   6   0    9441     795  -2
   6   0   0    9441     795   1
   0   6   0    9441     795  -2
   6   0   0    9441     795   1
   6   1   0    1621     159   1
   6  -1   0    1335     159   1
   6  -1   0    1335     159   1
  -6   1   0    1717     159   1
  -1   0  -6    1399     159   1
  -1   0   6    1462     159   1
   0  -6  -1    1621     159   1
   0  -6  -1    1303     159   1
   0  -6   1    1526     159   1
   1   0   6    1367     159   1
   1   0   6    1653     159   1
   6   1   0    1717     159   1
  -6   0   2 1192033  101151  -2
   0  -6  -2 1192033  101151   1
  -6   0  -2 1025462  100992  -2
   0  -6   2 1025462  100992   1
   6   0   2 1068090  100992  -2
   0   6  -2 1068090  100992   1
   0  -2  -6 1010267  101087  -2
  -2   0   6 1010267  101087   1
   2   6   0 1103025  101183  -2
   6   2   0 1103025  101183   1
   0   2   6 1033886  101087  -2
   2   0  -6 1033886  101087   1
   0   2  -6 1106300  101151  -2
   2   0   6 1106300  101151   1
  -2   6   0 1146226  101214  -2
   6  -2   0 1146226  101214   1
   6   0  -2 1129887  101119  -2
   0   6   2 1129887  101119   1
  -2  -6   0 1174740  101214  -2
  -6  -2   0 1174740  101214   1
  -6  -3   0    1526     159   1
  -3   0   6    1081     159   1
  -6   3   0    1558     159   1
   0   6  -3    1335     159   1
   0   6   3    1621     159   1
   0   6  -3    1462     159   1
   6   3   0    1399     159   1
   3   0  -6    1653     159   1
   6   3   0    1399     159   1
   0  -6   3    1431     159   1
   0  -6   3    1335     159   1
   0  -6   3    1272     159   1
   0   6  -3    1208     127   1
   0   6  -3    1399     159   1
  -6   0  -4   20217    1780  -2
   0  -6   4   20217    1780   1
  -6   0   4   19645    1780  -2
   0  -6  -4   19645    1780   1
   4   6   0   18406    1780  -2
   6   4   0   18406    1780   1
   6   0   4   20758    1780  -2
   0   6  -4   20758    1780   1
   6   0   4   18406    1780  -2
   0   6  -4   18406    1780   1
   6   0   4   18215    1780  -2
   0   6  -4   18215    1780   1
   6   0   4   17738    1780  -2
   0   6  -4   17738    1780   1
   6   0   4   20821    1780  -2
   0   6  -4   20821    1780   1
   6   0  -4   20217    1780  -2
   0   6   4   20217    1780   1
   0   4   6   18787    1780  -2
   4   0  -6   18787    1780   1
   0   4  -6   19899    1780  -2
   4   0   6   19899    1780   1
   4   6   0   18024    1780  -2
   6   4   0   18024    1780   1
   0  -4  -6   19550    1780  -2
  -4   0   6   19550    1780   1
  -4  -6   0   19931    1780  -2
  -6  -4   0   19931    1780   1
   4  -6   0   17897    1780  -2
  -6   4   0   17897    1780   1
  -6   0  -4   19327    1780  -2
   0  -6   4   19327    1780   1
   0  -4   6   19105    1780  -2
  -4   0  -6   19105    1780   1
  -6   0  -4   18978    1780  -2
   0  -6   4   18978    1780   1
   0   6  -5     636     127   1
  -6  -5   0     540     127   1
  -6   5   0     572      95   1
  -6   5   0     668      95   1
   0  -6   5     572     127   1
   0   6   5     731      95   1
   5   0  -6     795      95   1
   5   0   6     604      95   1
   6   5   0     763      95   1
   6   5   0     477      95   1
   6   5   0     699      95   1
   0   6  -5     699     127   1
   0  -6   5     731     127   1
   0   6  -5     636     127   1
  -1   1  -6   81601    7534  -2
   1  -1   6   81601    7534   1
   6   1   1   83953    7534  -2
   1   6  -1   83953    7534   1
   6   1   1   87259    7534  -2
   1   6  -1   87259    7534   1
   6   1   1   80266    7566  -2
   1   6  -1   80266    7566   1
   6   1   1   89198    7534  -2
   1   6  -1   89198    7534   1
   1  -6  -1   80043    7534  -2
  -6   1   1   80043    7534   1
   6  -1  -1   84494    7534  -2
  -1   6   1   84494    7534   1
   1   1   6   80075    7534  -2
   1   1  -6   80075    7534   1
  -1   1  -6   83540    7534  -2
   1  -1   6   83540    7534   1
  -1   6  -1   84208    7534  -2
   6  -1   1   84208    7534   1
   1  -1  -6   89421    7534  -2
  -1   1   6   89421    7534   1
  -6  -1   1   82491    7534  -2
  -1  -6  -1   82491    7534   1
  -1  -1   6   73272    7534  -2
  -1  -1  -6   73272    7534   1
  -6   1  -1   77309    7534  -2
   1  -6   1   77309    7534   1
  -6   1  -1   83190    7534  -2
   1  -6   1   83190    7534   1
  -1   6  -1   82555    7534  -2
   6  -1   1   82555    7534   1
   6   1  -1   85543    7566  -2
   1   6   1   85543    7566   1
   6  -1   1   80965    7534  -2
  -1   6  -1   80965    7534   1
  -6  -1  -1   85447    7534  -2
  -1  -6   1   85447    7534   1
   6  -1   1   78040    7534  -2
  -1   6  -1   78040    7534   1
   1   1  -6   87418    7534  -2
   1   1   6   87418    7534   1
   1  -1   6   72509    7534  -2
  -1   1  -6   72509    7534   1
   1   6  -1   89071    7534  -2
   6   1   1   89071    7534   1
  -6   1   1   80456    7534  -2
   1  -6  -1   80456    7534   1
   1   6  -1   88086    7534  -2
   6   1   1   88086    7534   1
  -6  -1  -1   79439    7534  -2
  -1  -6   1   79439    7534   1
  -1   1   6   77595    7534  -2
   1  -1  -6   77595    7534   1
  -1  -1  -6   87196    7534  -2
  -1  -1   6   87196    7534   1
   1  -6   1   74576    7534  -2
  -6   1  -1   74576    7534   1
   6  -1   1   69680    7534  -2
  -1   6  -1   69680    7534   1
   6   1   2  151980   15449  -2
   1   6  -2  151980   15449   1
  -1   2  -6  164378   15449  -2
   2  -1   6  164378   15449   1
   1   2   6  160754   15449  -2
   2   1  -6  160754   15449   1
  -6   1  -2  173406   15449  -2
   1  -6   2  173406   15449   1
  -6   1  -2  177030   15449  -2
   1  -6   2  177030   15449   1
   2   6   1  165522   15449  -2
   6   2  -1  165522   15449   1
  -2   6  -1  176235   15417  -2
   6  -2   1  176235   15417   1
   6  -1  -2  170132   15449  -2
  -1   6   2  170132   15449   1
   6   1   2  179891   15449  -2
   1   6  -2  179891   15449   1
   6   1   2  170227   15449  -2
   1   6  -2  170227   15449   1
   1  -2  -6  169591   15449  -2
  -2   1   6  169591   15449   1
  -1   2  -6  168033   15449  -2
   2  -1   6  168033   15449   1
  -6  -1   2  161167   15449  -2
  -1  -6  -2  161167   15449   1
   2   6   1  163265   15449  -2
   6   2  -1  163265   15449   1
  -2   6  -1  181480   15417  -2
   6  -2   1  181480   15417   1
  -1  -2  -6  174264   15449  -2
  -2  -1   6  174264   15449   1
  -6  -1  -2  163710   15449  -2
  -1  -6   2  163710   15449   1
   2   6  -1  162693   15449  -2
   6   2   1  162693   15449   1
   6  -1   2  181543   15449  -2
  -1   6  -2  181543   15449   1
   6  -1   2  185422   15449  -2
  -1   6  -2  185422   15449   1
   1  -2   6  144415   15449  -2
  -2   1  -6  144415   15449   1
   6  -1   2  176998   15449  -2
  -1   6  -2  176998   15449   1
   2   6  -1  167874   15449  -2
   6   2   1  167874   15449   1
   6   1  -2  152521   15449  -2
   1   6   2  152521   15449   1
  -1   2   6  151249   15449  -2
   2  -1  -6  151249   15449   1
   6  -1   2  161676   15449  -2
  -1   6  -2  161676   15449   1
  -6  -1  -2  179668   15449  -2
  -1  -6   2  179668   15449   1
  -6   1  -3    6326     604  -2
   1  -6   3    6326     604   1
   6   1   3    5913     604  -2
   1   6  -3    5913     604   1
   6   1   3    5627     604  -2
   1   6  -3    5627     604   1
   6  -1  -3    7152     604  -2
  -1   6   3    7152     604   1
   1   3   6    7438     604  -2
   3   1  -6    7438     604   1
   1  -3  -6    6739     604  -2
  -3   1   6    6739     604   1
   6   1   3    5340     604  -2
   1   6  -3    5340     604   1
  -6   1  -3    6517     604  -2
   1  -6   3    6517     604   1
  -1   3  -6    6644     604  -2
   3  -1   6    6644     604   1
  -1  -3   6    6262     604  -2
  -3  -1  -6    6262     604   1
  -6  -1   3    6930     604  -2
  -1  -6  -3    6930     604   1
  -1   3   6    5817     604  -2
   3  -1  -6    5817     604   1
   6  -1   3    6230     604  -2
  -1   6  -3    6230     604   1
   6  -1   3    6072     604  -2
  -1   6  -3    6072     604   1
   3  -6   1    5785     604  -2
  -6   3  -1    5785     604   1
  -6  -1  -3    5976     604  -2
  -1  -6   3    5976     604   1
  -1  -3  -6    7057     604  -2
  -3  -1   6    7057     604   1
   1  -3   6    6040     604  -2
  -3   1  -6    6040     604   1
   6  -1   3    6930     604  -2
  -1   6  -3    6930     604   1
   6   1  -3    6517     604  -2
   1   6   3    6517     604   1
  -6  -1  -3    6580     604  -2
  -1  -6   3    6580     604   1
  -6  -1  -3    5849     604  -2
  -1  -6   3    5849     604   1
   6  -1   3    6835     604  -2
  -1   6  -3    6835     604   1
   6  -1   3    6072     604  -2
  -1   6  -3    6072     604   1
   1  -4  -6   18660    1621  -2
  -4   1   6   18660    1621   1
  -4  -6   1   16753    1621  -2
  -6  -4  -1   16753    1621   1
   6   1   4   16784    1621  -2
   1   6  -4   16784    1621   1
   6   1   4   16975    1653  -2
   1   6  -4   16975    1653   1
   6   1   4   17865    1653  -2
   1   6  -4   17865    1653   1
   4  -6  -1   18406    1621  -2
  -6   4   1   18406    1621   1
  -6   1  -4   18310    1621  -2
   1  -6   4   18310    1621   1
  -1   4  -6   17738    1653  -2
   4  -1   6   17738    1653   1
   4   6   1   15258    1621  -2
   6   4  -1   15258    1621   1
  -6   1  -4   18469    1621  -2
   1  -6   4   18469    1621   1
   6  -1  -4   15576    1621  -2
  -1   6   4   15576    1621   1
  -1  -4   6   17420    1621  -2
  -4  -1  -6   17420    1621   1
  -6   1  -4   18088    1653  -2
   1  -6   4   18088    1653   1
   4   6   1   16212    1621  -2
   6   4  -1   16212    1621   1
   4   6   1   16625    1621  -2
   6   4  -1   16625    1621   1
   1   4   6   16721    1621  -2
   4   1  -6   16721    1621   1
   6  -1   4   19359    1621  -2
  -1   6  -4   19359    1621   1
   6  -1   4   18056    1653  -2
  -1   6  -4   18056    1653   1
  -1   4   6   17643    1621  -2
   4  -1  -6   17643    1621   1
  -4  -6  -1   17547    1653  -2
  -6  -4   1   17547    1653   1
  -6  -1  -4   18342    1653  -2
  -1  -6   4   18342    1653   1
  -6  -1  -4   17547    1621  -2
  -1  -6   4   17547    1621   1
   6   1  -4   16498    1621  -2
   1   6   4   16498    1621   1
   6   1  -4   17643    1621  -2
   1   6   4   17643    1621   1
   6  -1   4   18755    1653  -2
  -1   6  -4   18755    1653   1
   6  -1   4   16689    1621  -2
  -1   6  -4   16689    1621   1
  -6  -1  -4   18755    1653  -2
  -1  -6   4   18755    1653   1
   6  -1   4   19168    1621  -2
  -1   6  -4   19168    1621   1
  -1  -4  -6   16117    1653  -2
  -4  -1   6   16117    1653   1
   4  -6   1   18787    1621  -2
  -6   4  -1   18787    1621   1
  -6   1  -5   12111    1049  -2
   1  -6   5   12111    1049   1
   5   6   1   12747    1049  -2
   6   5  -1   12747    1049   1
   5  -6  -1   10013    1049  -2
  -6   5   1   10013    1049   1
   5  -6  -1    9537    1049  -2
  -6   5   1    9537    1049   1
  -1   5  -6   11189    1049  -2
   5  -1   6   11189    1049   1
   6   1   5   10872    1049  -2
   1   6  -5   10872    1049   1
   1   5   6   11825    1049  -2
   5   1  -6   11825    1049   1
   1  -5  -6   11571    1049  -2
  -5   1   6   11571    1049   1
  -6  -1   5   11412    1049  -2
  -1  -6  -5   11412    1049   1
   6  -1  -5   12143    1049  -2
  -1   6   5   12143    1049   1
   1   5   6   12588    1049  -2
   5   1  -6   12588    1049   1
   5   6   1   11857    1049  -2
   6   5  -1   11857    1049   1
   5   6   1   11062    1049  -2
   6   5  -1   11062    1049   1
  -1  -5   6   10268    1049  -2
  -5  -1  -6   10268    1049   1
   6   1   5   10554    1049  -2
   1   6  -5   10554    1049   1
  -6   1  -5   11285    1049  -2
   1  -6   5   11285    1049   1
   6  -1   5   11603    1049  -2
  -1   6  -5   11603    1049   1
   1  -5   6   10045    1049  -2
  -5   1  -6   10045    1049   1
   5  -6   1   10967    1049  -2
  -6   5  -1   10967    1049   1
   6  -1   5   10331    1049  -2
  -1   6  -5   10331    1049   1
  -1   5   6   10395    1049  -2
   5  -1  -6   10395    1049   1
  -6  -1  -5   11857    1049  -2
  -1  -6   5   11857    1049   1
  -6  -1  -5   11635    1049  -2
  -1  -6   5   11635    1049   1
   1  -5   6    9791    1049  -2
  -5   1  -6    9791    1049   1
   1   5  -6   11603    1049  -2
   5   1   6   11603    1049   1
  -5  -6  -1   12016    1081  -2
  -6  -5   1   12016    1081   1
   6  -1   5   10395    1049  -2
  -1   6  -5   10395    1049   1
   6   1  -5   11476    1049  -2
   1   6   5   11476    1049   1
   5   6  -1   12843    1049  -2
   6   5   1   12843    1049   1
   5  -6   1   10903    1049  -2
  -6   5  -1   10903    1049   1
  -6   1   5   11666    1049  -2
   1  -6  -5   11666    1049   1
   5  -6   1   10172    1049  -2
  -6   5  -1   10172    1049   1
  -2   0   6 1102644  103090  -2
   0  -2  -6 1102644  103090   1
  -6   2   0 1040307  102994  -2
   2  -6   0 1040307  102994   1
   2   0   6 1153982  102994  -2
   0   2  -6 1153982  102994   1
  -2   0  -6 1207291  102994  -2
   0  -2   6 1207291  102994   1
   6   2   0 1114755  103026  -2
   2   6   0 1114755  103026   1
   0   6   2 1091391  103122  -2
   6   0  -2 1091391  103122   1
   2   0  -6 1163233  103090  -2
   0   2   6 1163233  103090   1
   0  -6   2 1243753  103153  -2
  -6   0  -2 1243753  103153   1
   6  -2   0 1123688  102994  -2
  -2   6   0 1123688  102994   1
  -6  -2   0 1039131  103026  -2
  -2  -6   0 1039131  103026   1
   0   6  -2  975045  103090  -2
   6   0   2  975045  103090   1
   0   6   2 1182210  103090  -2
   6   0  -2 1182210  103090   1
  -6  -2   1   16848    1717  -2
  -2  -6  -1   16848    1717   1
   6   2   1   16276    1685  -2
   2   6  -1   16276    1685   1
   6   2   1   16085    1717  -2
   2   6  -1   16085    1717   1
   6   2   1   17484    1717  -2
   2   6  -1   17484    1717   1
   6   2   1   16148    1685  -2
   2   6  -1   16148    1685   1
   6  -2  -1   18787    1717  -2
  -2   6   1   18787    1717   1
  -1   6  -2   20186    1717  -2
   6  -1   2   20186    1717   1
  -2   1  -6   20631    1685  -2
   1  -2   6   20631    1685   1
  -2   1  -6   18564    1717  -2
   1  -2   6   18564    1717   1
  -6   2  -1   21139    1717  -2
   2  -6   1   21139    1717   1
  -6   2  -1   20058    1685  -2
   2  -6   1   20058    1685   1
   2   1   6   15703    1717  -2
   1   2  -6   15703    1717   1
   2  -1  -6   18819    1685  -2
  -1   2   6   18819    1685   1
  -2  -1   6   17261    1685  -2
  -1  -2  -6   17261    1685   1
  -2   1  -6   19963    1717  -2
   1  -2   6   19963    1717   1
   1  -6   2   18151    1717  -2
  -6   1  -2   18151    1717   1
  -2  -1  -6   19200    1717  -2
  -1  -2   6   19200    1717   1
   1   6  -2   16276    1685  -2
   6   1   2   16276    1685   1
   6  -2   1   20408    1685  -2
  -2   6  -1   20408    1685   1
  -2   1   6   16212    1685  -2
   1  -2  -6   16212    1685   1
  -6  -2  -1   18151    1717  -2
  -2  -6   1   18151    1717   1
   6  -2   1   19550    1717  -2
  -2   6  -1   19550    1717   1
  -6  -2  -1   17261    1717  -2
  -2  -6   1   17261    1717   1
   6  -2   1   20186    1717  -2
  -2   6  -1   20186    1717   1
   2  -1   6   20631    1717  -2
  -1   2  -6   20631    1717   1
  -2  -1  -6   17420    1717  -2
  -1  -2   6   17420    1717   1
   2   2   6  178746   15958  -2
   2   2  -6  178746   15958   1
  -2   6  -2  181861   15958  -2
   6  -2   2  181861   15958   1
   6   2   2  175885   15958  -2
   2   6  -2  175885   15958   1
   6   2   2  155032   15958  -2
   2   6  -2  155032   15958   1
  -6   2  -2  178778   15958  -2
   2  -6   2  178778   15958   1
  -6   2  -2  188569   15958  -2
   2  -6   2  188569   15958   1
  -2   2  -6  176807   15958  -2
   2  -2   6  176807   15958   1
   6   2   2  173247   15958  -2
   2   6  -2  173247   15958   1
  -2  -2   6  177379   15958  -2
  -2  -2  -6  177379   15958   1
  -2   2  -6  170736   15958  -2
   2  -2   6  170736   15958   1
   2  -2  -6  182211   15958  -2
  -2   2   6  182211   15958   1
  -6  -2   2  171689   15958  -2
  -2  -6  -2  171689   15958   1
  -6  -2  -2  168224   15958  -2
  -2  -6   2  168224   15958   1
   6   2  -2  153951   15958  -2
   2   6   2  153951   15958   1
   6  -2   2  177284   15958  -2
  -2   6  -2  177284   15958   1
  -6  -2  -2  188187   15958  -2
  -2  -6   2  188187   15958   1
   6  -2   2  164886   15958  -2
  -2   6  -2  164886   15958   1
  -2  -2  -6  170990   15958  -2
  -2  -2   6  170990   15958   1
  -2   2   6  162534   15958  -2
   2  -2  -6  162534   15958   1
   3   6   2    1971     191  -2
   6   3  -2    1971     191   1
  -3  -6   2    2034     191  -2
  -6  -3  -2    2034     191   1
   2   3   6    1907     223  -2
   3   2  -6    1907     223   1
   3   6   2    2034     191  -2
   6   3  -2    2034     191   1
   6   2   3    1558     191  -2
   2   6  -3    1558     191   1
   6  -2  -3    1812     191  -2
  -2   6   3    1812     191   1
   3   6   2    2034     191  -2
   6   3  -2    2034     191   1
   6   2   3    1558     191  -2
   2   6  -3    1558     191   1
  -2  -3   6    1621     191  -2
  -3  -2  -6    1621     191   1
   6   2   3    1526     223  -2
   2   6  -3    1526     223   1
  -6   2  -3    2289     191  -2
   2  -6   3    2289     191   1
  -6  -2   3    2034     191  -2
  -2  -6  -3    2034     191   1
   2  -3  -6    2098     191  -2
  -3   2   6    2098     191   1
  -2   3  -6    2384     223  -2
   3  -2   6    2384     223   1
  -6  -2  -3    1621     223  -2
  -2  -6   3    1621     223   1
   2  -3   6    2257     191  -2
  -3   2  -6    2257     191   1
   3  -6   2    2003     191  -2
  -6   3  -2    2003     191   1
   6   2  -3    1653     191  -2
   2   6   3    1653     191   1
  -2   3   6    2225     191  -2
   3  -2  -6    2225     191   1
  -2  -3  -6    1971     254  -2
  -3  -2   6    1971     254   1
  -6  -2  -3    1748     191  -2
  -2  -6   3    1748     191   1
   6   2  -3    1844     191  -2
   2   6   3    1844     191   1
   3   6  -2    1685     191  -2
   6   3   2    1685     191   1
   6  -2   3    2130     223  -2
  -2   6  -3    2130     223   1
  -6  -2  -3    1589     191  -2
  -2  -6   3    1589     191   1
   6  -2   3    2098     223  -2
  -2   6  -3    2098     223   1
   6  -2   3    2098     191  -2
  -2   6  -3    2098     191   1
   4   6   2    2416     223  -2
   6   4  -2    2416     223   1
   4   6   2    2734     223  -2
   6   4  -2    2734     223   1
  -2  -4   6    2511     254  -2
  -4  -2  -6    2511     254   1
  -6   2  -4    2289     223  -2
   2  -6   4    2289     223   1
   6  -2  -4    2416     254  -2
  -2   6   4    2416     254   1
  -2   4  -6    2289     254  -2
   4  -2   6    2289     254   1
   2   4   6    2543     223  -2
   4   2  -6    2543     223   1
   2  -4  -6    2543     223  -2
  -4   2   6    2543     223   1
  -6  -2   4    2607     223  -2
  -2  -6  -4    2607     223   1
   4   6   2    2734     223  -2
   6   4  -2    2734     223   1
  -6   2  -4    2066     254  -2
   2  -6   4    2066     254   1
  -6   2  -4    2066     254  -2
   2  -6   4    2066     254   1
   6   2   4    2130     223  -2
   2   6  -4    2130     223   1
   6   2   4    2289     254  -2
   2   6  -4    2289     254   1
  -4  -6  -2    2479     254  -2
  -6  -4   2    2479     254   1
  -6  -2  -4    2575     254  -2
  -2  -6   4    2575     254   1
   4  -6   2    2225     254  -2
  -6   4  -2    2225     254   1
   6  -2   4    2289     223  -2
  -2   6  -4    2289     223   1
   6  -2   4    1971     254  -2
  -2   6  -4    1971     254   1
   6  -2   4    2066     223  -2
  -2   6  -4    2066     223   1
   2  -4   6    2130     223  -2
  -4   2  -6    2130     223   1
   6   2  -4    2384     223  -2
   2   6   4    2384     223   1
   6  -2   4    2193     223  -2
  -2   6  -4    2193     223   1
   6   2  -4    2670     254  -2
   2   6   4    2670     254   1
   4  -6   2    2003     223  -2
  -6   4  -2    2003     223   1
   4  -6   2    2130     223  -2
  -6   4  -2    2130     223   1
   6  -2   4    1844     254  -2
  -2   6  -4    1844     254   1
   2  -4   6    1971     223  -2
  -4   2  -6    1971     223   1
  -6  -2  -4    2829     254  -2
  -2  -6   4    2829     254   1
   6  -2  -5   12143    1144  -2
  -2   6   5   12143    1144   1
  -6   2  -5   13447    1144  -2
   2  -6   5   13447    1144   1
   6   2   5   13097    1144  -2
   2   6  -5   13097    1144   1
  -6   2  -5   13033    1176  -2
   2  -6   5   13033    1176   1
   2  -5  -6   11666    1144  -2
  -5   2   6   11666    1144   1
   2   5   6   12366    1144  -2
   5   2  -6   12366    1144   1
   6  -2  -5   12238    1144  -2
  -2   6   5   12238    1144   1
  -6  -2   5   11189    1144  -2
  -2  -6  -5   11189    1144   1
  -2   5  -6   12843    1176  -2
   5  -2   6   12843    1176   1
   5  -6  -2   12302    1144  -2
  -6   5   2   12302    1144   1
   2   5   6   12556    1144  -2
   5   2  -6   12556    1144   1
  -2  -5   6   13319    1144  -2
  -5  -2  -6   13319    1144   1
  -5  -6   2   12048    1144  -2
  -6  -5  -2   12048    1144   1
   5   6   2   11285    1144  -2
   6   5  -2   11285    1144   1
  -6  -2  -5   11730    1176  -2
  -2  -6   5   11730    1176   1
   2  -5   6   11666    1144  -2
  -5   2  -6   11666    1144   1
   6  -2   5   13192    1176  -2
  -2   6  -5   13192    1176   1
   6  -2   5   13256    1176  -2
  -2   6  -5   13256    1176   1
   5   6  -2   11094    1144  -2
   6   5   2   11094    1144   1
   5  -6   2   11857    1144  -2
  -6   5  -2   11857    1144   1
   5  -6   2   13065    1144  -2
  -6   5  -2   13065    1144   1
   5  -6   2   13383    1144  -2
  -6   5  -2   13383    1144   1
   6  -2   5   14178    1144  -2
  -2   6  -5   14178    1144   1
   6   2  -5   10872    1144  -2
   2   6   5   10872    1144   1
  -6  -2  -5   12811    1176  -2
  -2  -6   5   12811    1176   1
   2  -5   6   12429    1144  -2
  -5   2  -6   12429    1144   1
   2  -5   6   11476    1144  -2
  -5   2  -6   11476    1144   1
   6   2  -5   10776    1144  -2
   2   6   5   10776    1144   1
   5  -6   2   12938    1176  -2
  -6   5  -2   12938    1176   1
  -3   1  -6    5118     604  -2
   1  -3   6    5118     604   1
   6   3   1    6644     572  -2
   3   6  -1    6644     572   1
   3  -1  -6    7184     572  -2
  -1   3   6    7184     572   1
   6  -3  -1    6262     604  -2
  -3   6   1    6262     604   1
   3   1   6    6517     604  -2
   1   3  -6    6517     604   1
  -3  -1   6    5913     572  -2
  -1  -3  -6    5913     572   1
  -3   1  -6    5468     572  -2
   1  -3   6    5468     572   1
   6   3   1    5881     604  -2
   3   6  -1    5881     604   1
   6   3   1    5245     572  -2
   3   6  -1    5245     572   1
  -3  -1  -6    7216     604  -2
  -1  -3   6    7216     604   1
  -3  -1  -6    5913     604  -2
  -1  -3   6    5913     604   1
  -3  -1  -6    7152     604  -2
  -1  -3   6    7152     604   1
  -6  -3  -1    6771     604  -2
  -3  -6   1    6771     604   1
  -6  -3  -1    6739     604  -2
  -3  -6   1    6739     604   1
   3   1  -6    6072     604  -2
   1   3   6    6072     604   1
   3  -1   6    5118     604  -2
  -1   3  -6    5118     604   1
   2   6   3    3179     286  -2
   6   2  -3    3179     286   1
   6   3   2    2861     318  -2
   3   6  -2    2861     318   1
   6   3   2    3084     318  -2
   3   6  -2    3084     318   1
  -2  -6   3    3751     318  -2
  -6  -2  -3    3751     318   1
  -6  -3   2    3433     318  -2
  -3  -6  -2    3433     318   1
   6   3   2    2893     318  -2
   3   6  -2    2893     318   1
   6   3   2    3115     318  -2
   3   6  -2    3115     318   1
  -3  -2   6    2956     318  -2
  -2  -3  -6    2956     318   1
  -3   2  -6    2925     318  -2
   2  -3   6    2925     318   1
  -3   2  -6    2861     286  -2
   2  -3   6    2861     286   1
  -2   6  -3    2861     318  -2
   6  -2   3    2861     318   1
   6   3   2    3306     318  -2
   3   6  -2    3306     318   1
   6  -3  -2    3688     318  -2
  -3   6   2    3688     318   1
   3  -2  -6    3592     318  -2
  -2   3   6    3592     318   1
   6   3  -2    3338     318  -2
   3   6   2    3338     318   1
  -3   2   6    2925     318  -2
   2  -3  -6    2925     318   1
  -6  -3  -2    3211     318  -2
  -3  -6   2    3211     318   1
  -6  -3  -2    3084     318  -2
  -3  -6   2    3084     318   1
   3  -2   6    3084     318  -2
  -2   3  -6    3084     318   1
   6  -3   2    2956     318  -2
  -3   6  -2    2956     318   1
   6   3  -2    2702     286  -2
   3   6   2    2702     286   1
   3   2  -6    3147     286  -2
   2   3   6    3147     286   1
   6  -3   2    2988     286  -2
  -3   6  -2    2988     286   1
   6  -3   2    2956     318  -2
  -3   6  -2    2956     318   1
   3  -3  -6   31661    2575  -2
  -3   3   6   31661    2575   1
   3   3   6   25971    2575  -2
   3   3  -6   25971    2575   1
  -6  -3   3   32202    2575  -2
  -3  -6  -3   32202    2575   1
   6   3   3   31947    2575  -2
   3   6  -3   31947    2575   1
  -3  -6   3   29690    2575  -2
  -6  -3  -3   29690    2575   1
   6   3   3   28800    2575  -2
   3   6  -3   28800    2575   1
   6   3   3   28482    2575  -2
   3   6  -3   28482    2575   1
  -6   3  -3   26130    2607  -2
   3  -6   3   26130    2607   1
  -6   3  -3   26766    2575  -2
   3  -6   3   26766    2575   1
   3   3   6   24636    2575  -2
   3   3  -6   24636    2575   1
  -3   3  -6   27688    2607  -2
   3  -3   6   27688    2607   1
  -3   3  -6   28514    2575  -2
   3  -3   6   28514    2575   1
  -3   6  -3   27942    2575  -2
   6  -3   3   27942    2575   1
   6   3   3   30580    2575  -2
   3   6  -3   30580    2575   1
  -3  -3   6   27465    2575  -2
  -3  -3  -6   27465    2575   1
   3   6   3   28927    2575  -2
   6   3  -3   28927    2575   1
  -6  -3  -3   27147    2575  -2
  -3  -6   3   27147    2575   1
  -3  -3  -6   26035    2575  -2
  -3  -3   6   26035    2575   1
   3  -3   6   29436    2575  -2
  -3   3  -6   29436    2575   1
   6  -3   3   26607    2607  -2
  -3   6  -3   26607    2607   1
   6   3  -3   30263    2575  -2
   3   6   3   30263    2575   1
   6   3  -3   27274    2575  -2
   3   6   3   27274    2575   1
  -3  -3  -6   27116    2607  -2
  -3  -3   6   27116    2607   1
  -6  -3  -3   30199    2575  -2
  -3  -6   3   30199    2575   1
  -6  -3  -3   27052    2607  -2
  -3  -6   3   27052    2607   1
   6  -3   3   26003    2575  -2
  -3   6  -3   26003    2575   1
   3   6  -3   27020    2575  -2
   6   3   3   27020    2575   1
   3  -6   3   26543    2575  -2
  -6   3  -3   26543    2575   1
   6  -3   3   25717    2575  -2
  -3   6  -3   25717    2575   1
   3  -6   3   24223    2575  -2
  -6   3  -3   24223    2575   1
   3  -6   3   25399    2575  -2
  -6   3  -3   25399    2575   1
  -3  -6  -3   28641    2575  -2
  -6  -3   3   28641    2575   1
   3   3  -6   28292    2575  -2
   3   3   6   28292    2575   1
   3  -3   6   29055    2575  -2
  -3   3  -6   29055    2575   1
  -3   4  -6    5817     540  -2
   4  -3   6    5817     540   1
  -4   6  -3    6294     540  -2
   6  -4   3    6294     540   1
  -6  -3   4    5690     540  -2
  -3  -6  -4    5690     540   1
  -4  -6   3    5722     540  -2
  -6  -4  -3    5722     540   1
   6  -3  -4    4927     540  -2
  -3   6   4    4927     540   1
   6  -3  -4    4959     540  -2
  -3   6   4    4959     540   1
  -6   3  -4    6517     540  -2
   3  -6   4    6517     540   1
  -6   3  -4    6485     540  -2
   3  -6   4    6485     540   1
  -6   3  -4    6517     540  -2
   3  -6   4    6517     540   1
   6   3   4    4991     540  -2
   3   6  -4    4991     540   1
   3  -4  -6    5595     540  -2
  -4   3   6    5595     540   1
   3   4   6    5531     540  -2
   4   3  -6    5531     540   1
   3   4   6    5944     540  -2
   4   3  -6    5944     540   1
   6   3   4    4895     540  -2
   3   6  -4    4895     540   1
  -3  -4   6    5086     540  -2
  -4  -3  -6    5086     540   1
   4   6   3    5849     540  -2
   6   4  -3    5849     540   1
   6   3   4    5023     540  -2
   3   6  -4    5023     540   1
   6   3  -4    5086     540  -2
   3   6   4    5086     540   1
  -4  -6  -3    5054     540  -2
  -6  -4   3    5054     540   1
   6  -3   4    5690     540  -2
  -3   6  -4    5690     540   1
   3  -4   6    5881     540  -2
  -4   3  -6    5881     540   1
   3  -4   6    5150     540  -2
  -4   3  -6    5150     540   1
  -3  -4  -6    5913     540  -2
  -4  -3   6    5913     540   1
  -6  -3  -4    4895     540  -2
  -3  -6   4    4895     540   1
  -3  -4  -6    5722     540  -2
  -4  -3   6    5722     540   1
   4  -6   3    5754     540  -2
  -6   4  -3    5754     540   1
   6   3  -4    5182     540  -2
   3   6   4    5182     540   1
   4  -6   3    6103     540  -2
  -6   4  -3    6103     540   1
   4  -6   3    5722     540  -2
  -6   4  -3    5722     540   1
   6  -3   4    6453     540  -2
  -3   6  -4    6453     540   1
  -4  -6  -3    5372     509  -2
  -6  -4   3    5372     509   1
   3  -4   6    5118     540  -2
  -4   3  -6    5118     540   1
   6  -3   4    5817     540  -2
  -3   6  -4    5817     540   1
   6  -3  -5   25367    2511  -2
  -3   6   5   25367    2511   1
  -3   5  -6   28991    2543  -2
   5  -3   6   28991    2543   1
   3   5   6   26448    2511  -2
   5   3  -6   26448    2511   1
   5   6   3   24445    2511  -2
   6   5  -3   24445    2511   1
   3  -5  -6   26861    2511  -2
  -5   3   6   26861    2511   1
   5   6   3   24859    2511  -2
   6   5  -3   24859    2511   1
   5  -6  -3   27751    2511  -2
  -6   5   3   27751    2511   1
   5  -6  -3   25240    2511  -2
  -6   5   3   25240    2511   1
   5   6   3   28196    2511  -2
   6   5  -3   28196    2511   1
   6  -3  -5   24541    2511  -2
  -3   6   5   24541    2511   1
  -5  -6   3   27656    2511  -2
  -6  -5  -3   27656    2511   1
  -6   3  -5   29404    2543  -2
   3  -6   5   29404    2543   1
  -6   3  -5   29659    2511  -2
   3  -6   5   29659    2511   1
   6   3   5   26893    2511  -2
   3   6  -5   26893    2511   1
   3   5   6   25653    2511  -2
   5   3  -6   25653    2511   1
  -3  -5  -6   26321    2511  -2
  -5  -3   6   26321    2511   1
   3  -5   6   28355    2511  -2
  -5   3  -6   28355    2511   1
   3  -5   6   28228    2511  -2
  -5   3  -6   28228    2511   1
   6  -3   5   29945    2511  -2
  -3   6  -5   29945    2511   1
   6   3  -5   25113    2511  -2
   3   6   5   25113    2511   1
   5  -6   3   29214    2543  -2
  -6   5  -3   29214    2543   1
   5  -6   3   27751    2511  -2
  -6   5  -3   27751    2511   1
   5  -6   3   30390    2511  -2
  -6   5  -3   30390    2511   1
   5  -6   3   30294    2511  -2
  -6   5  -3   30294    2511   1
  -6  -3  -5   25876    2511  -2
  -3  -6   5   25876    2511   1
   6   3  -5   23937    2511  -2
   3   6   5   23937    2511   1
   6  -3   5   28355    2543  -2
  -3   6  -5   28355    2543   1
   6  -3   5   30167    2543  -2
  -3   6  -5   30167    2543   1
   5   6  -3   22951    2511  -2
   6   5   3   22951    2511   1
   3  -5   6   27561    2511  -2
  -5   3  -6   27561    2511   1
   6   4   0   10554    1017  -2
   4   6   0   10554    1017   1
   6   4   0    9982    1017  -2
   4   6   0    9982    1017   1
  -6  -4   0   10935    1017  -2
  -4  -6   0   10935    1017   1
   6   4   0    9759    1017  -2
   4   6   0    9759    1017   1
   6  -4   0   10649    1017  -2
  -4   6   0   10649    1017   1
   6  -4   0   11666    1017  -2
  -4   6   0   11666    1017   1
  -4   0  -6   12143    1017  -2
   0  -4   6   12143    1017   1
  -4   0  -6   12366    1017  -2
   0  -4   6   12366    1017   1
   4   0   6   11539    1017  -2
   0   4  -6   11539    1017   1
   4   0  -6   10649    1017  -2
   0   4   6   10649    1017   1
   6   4   0   10586    1017  -2
   4   6   0   10586    1017   1
   6  -4   0   11889    1017  -2
  -4   6   0   11889    1017   1
   0   6   4    9441    1017  -2
   6   0  -4    9441    1017   1
   6   4   0   10363    1017  -2
   4   6   0   10363    1017   1
   0  -6  -4   10363    1017  -2
  -6   0   4   10363    1017   1
   0   6  -4   11571    1017  -2
   6   0   4   11571    1017   1
   4   1   6   55312    4991  -2
   1   4  -6   55312    4991   1
   1   6   4   51593    4991  -2
   6   1  -4   51593    4991   1
  -4   1  -6   53373    4991  -2
   1  -4   6   53373    4991   1
  -1  -6   4   59126    4991  -2
  -6  -1  -4   59126    4991   1
   6   4   1   49050    4991  -2
   4   6  -1   49050    4991   1
  -1   6  -4   57855    4991  -2
   6  -1   4   57855    4991   1
   6   4   1   53436    4991  -2
   4   6  -1   53436    4991   1
  -6  -4   1   52355    4991  -2
  -4  -6  -1   52355    4991   1
   1  -6  -4   57283    4991  -2
  -6   1   4   57283    4991   1
  -4   1  -6   57346    4991  -2
   1  -4   6   57346    4991   1
   6   4   1   51529    4991  -2
   4   6  -1   51529    4991   1
   6  -4  -1   58713    4991  -2
  -4   6   1   58713    4991   1
  -4  -1   6   53786    4991  -2
  -1  -4  -6   53786    4991   1
   6   4   1   49940    4991  -2
   4   6  -1   49940    4991   1
   6   4  -1   49971    4991  -2
   4   6   1   49971    4991   1
   1  -6   4   56202    4991  -2
  -6   1  -4   56202    4991   1
  -4  -1  -6   59063    4991  -2
  -1  -4   6   59063    4991   1
  -4  -1  -6   58999    4991  -2
  -1  -4   6   58999    4991   1
  -1   6   4   50289    4991  -2
   6  -1  -4   50289    4991   1
   6  -4   1   53945    4991  -2
  -4   6  -1   53945    4991   1
   6  -4   1   54613    4991  -2
  -4   6  -1   54613    4991   1
   1   6  -4   60303    4991  -2
   6   1   4   60303    4991   1
   6   4  -1   53182    4991  -2
   4   6   1   53182    4991   1
  -4   1   6   51148    4991  -2
   1  -4  -6   51148    4991   1
   4  -1   6   53087    4991  -2
  -1   4  -6   53087    4991   1
  -1  -6  -4   47905    4991  -2
  -6  -1   4   47905    4991   1
   4   1  -6   56361    4991  -2
   1   4   6   56361    4991   1
  -6  -4  -1   50861    4991  -2
  -4  -6   1   50861    4991   1
   6   4  -1   49367    4991  -2
   4   6   1   49367    4991   1
   6  -4   1   56583    4991  -2
  -4   6  -1   56583    4991   1
  -2  -6   4    6167     509  -2
  -6  -2  -4    6167     509   1
  -4   2  -6    5531     509  -2
   2  -4   6    5531     509   1
  -4   2  -6    6230     540  -2
   2  -4   6    6230     540   1
   6   4   2    4991     509  -2
   4   6  -2    4991     509   1
   6   4   2    5150     509  -2
   4   6  -2    5150     509   1
   6   4   2    5023     509  -2
   4   6  -2    5023     509   1
  -4  -2   6    4641     509  -2
  -2  -4  -6    4641     509   1
   6   4   2    4991     509  -2
   4   6  -2    4991     509   1
   4   2   6    4578     509  -2
   2   4  -6    4578     509   1
   6  -4  -2    4800     509  -2
  -4   6   2    4800     509   1
  -2   6  -4    4736     509  -2
   6  -2   4    4736     509   1
  -4  -2  -6    4927     509  -2
  -2  -4   6    4927     509   1
   6  -4   2    5277     509  -2
  -4   6  -2    5277     509   1
  -6  -4  -2    4864     509  -2
  -4  -6   2    4864     509   1
  -6  -4  -2    4800     540  -2
  -4  -6   2    4800     540   1
   2   6  -4    5785     509  -2
   6   2   4    5785     509   1
  -4   2   6    5817     509  -2
   2  -4  -6    5817     509   1
   2  -6   4    5245     509  -2
  -6   2  -4    5245     509   1
   2  -6   4    4705     509  -2
  -6   2  -4    4705     509   1
   6   4  -2    6230     509  -2
   4   6   2    6230     509   1
   6  -4   2    5436     509  -2
  -4   6  -2    5436     509   1
   4  -2   6    5944     509  -2
  -2   4  -6    5944     509   1
   4  -2   6    5563     509  -2
  -2   4  -6    5563     509   1
   6   4  -2    6103     509  -2
   4   6   2    6103     509   1
  -6  -4   3   30517    2575  -2
  -4  -6  -3   30517    2575   1
  -3   6  -4   28324    2575  -2
   6  -3   4   28324    2575   1
  -4   3  -6   27942    2575  -2
   3  -4   6   27942    2575   1
   3  -6  -4   29595    2575  -2
  -6   3   4   29595    2575   1
   4  -3  -6   30485    2575  -2
  -3   4   6   30485    2575   1
  -3  -6   4   29436    2575  -2
  -6  -3  -4   29436    2575   1
  -4   3  -6   27052    2575  -2
   3  -4   6   27052    2575   1
   6  -4  -3   26798    2575  -2
  -4   6   3   26798    2575   1
   3   6   4   27751    2575  -2
   6   3  -4   27751    2575   1
   3   6   4   26066    2575  -2
   6   3  -4   26066    2575   1
   6   4   3   31407    2575  -2
   4   6  -3   31407    2575   1
  -4  -3   6   28006    2575  -2
  -3  -4  -6   28006    2575   1
   4   3   6   28292    2575  -2
   3   4  -6   28292    2575   1
   6   4   3   31788    2575  -2
   4   6  -3   31788    2575   1
   4  -3   6   28133    2575  -2
  -3   4  -6   28133    2575   1
  -6  -4  -3   25621    2575  -2
  -4  -6   3   25621    2575   1
   6   4  -3   28641    2575  -2
   4   6   3   28641    2575   1
  -6  -4  -3   25812    2575  -2
  -4  -6   3   25812    2575   1
  -4  -3  -6   26988    2575  -2
  -3  -4   6   26988    2575   1
   6  -4   3   25176    2575  -2
  -4   6  -3   25176    2575   1
   6  -4   3   26861    2575  -2
  -4   6  -3   26861    2575   1
   6  -4   3   25304    2575  -2
  -4   6  -3   25304    2575   1
   3  -6   4   27243    2575  -2
  -6   3  -4   27243    2575   1
   4   3  -6   29309    2575  -2
   3   4   6   29309    2575   1
  -4  -3  -6   26893    2575  -2
  -3  -4   6   26893    2575   1
   3  -6   4   24445    2575  -2
  -6   3  -4   24445    2575   1
   3  -6   4   25526    2575  -2
  -6   3  -4   25526    2575   1
   4  -3   6   26416    2575  -2
  -3   4  -6   26416    2575   1
  -3  -6  -4   28959    2575  -2
  -6  -3   4   28959    2575   1
   6   4  -3   27878    2575  -2
   4   6   3   27878    2575   1
   4   4   6    2257     191  -2
   4   4  -6    2257     191   1
   4  -6  -4    2321     223  -2
  -6   4   4    2321     223   1
   4  -6  -4    2162     191  -2
  -6   4   4    2162     191   1
   6   4   4    2193     191  -2
   4   6  -4    2193     191   1
  -6   4  -4    1876     223  -2
   4  -6   4    1876     223   1
   6  -4  -4    2130     223  -2
  -4   6   4    2130     223   1
   4   4   6    2098     191  -2
   4   4  -6    2098     191   1
  -4  -4   6    1971     191  -2
  -4  -4  -6    1971     191   1
   6   4   4    2384     223  -2
   4   6  -4    2384     223   1
   6  -4  -4    1907     191  -2
  -4   6   4    1907     191   1
   4  -6   4    1558     191  -2
  -6   4  -4    1558     191   1
   4  -4   6    1685     191  -2
  -4   4  -6    1685     191   1
   4  -6   4    1621     223  -2
  -6   4  -4    1621     223   1
   4  -6   4    1748     191  -2
  -6   4  -4    1748     191   1
   6  -4   4    1780     223  -2
  -4   6  -4    1780     223   1
   6  -4   4    1589     223  -2
  -4   6  -4    1589     223   1
  -4  -4  -6    2003     223  -2
  -4  -4   6    2003     223   1
   4  -6   4    1780     191  -2
  -6   4  -4    1780     191   1
   6  -4   4    1780     191  -2
  -4   6  -4    1780     191   1
   4  -4   6    1558     191  -2
  -4   4  -6    1558     191   1
  -5  -6   4  114470   10172  -2
  -6  -5  -4  114470   10172   1
   4   5   6  106873   10172  -2
   5   4  -6  106873   10172   1
  -6   4  -5  113421   10204  -2
   4  -6   5  113421   10204   1
   6   4   5  106332   10172  -2
   4   6  -5  106332   10172   1
   4  -5  -6  108080   10172  -2
  -5   4   6  108080   10172   1
   6  -4  -5  109352   10172  -2
  -4   6   5  109352   10172   1
  -6  -4   5  118221   10172  -2
  -4  -6  -5  118221   10172   1
   5   6   4  115646   10172  -2
   6   5  -4  115646   10172   1
  -4   5  -6  120700   10204  -2
   5  -4   6  120700   10204   1
   5  -6  -4  108589   10172  -2
  -6   5   4  108589   10172   1
   5  -6  -4  113643   10172  -2
  -6   5   4  113643   10172   1
   4  -5  -6  121718   10172  -2
  -5   4   6  121718   10172   1
   4   5   6  108176   10172  -2
   5   4  -6  108176   10172   1
   6  -4  -5  107858   10172  -2
  -4   6   5  107858   10172   1
   5   6   4  114534   10172  -2
   6   5  -4  114534   10172   1
   4   5   6   94888   10172  -2
   5   4  -6   94888   10172   1
   6   4   5  113167   10172  -2
   4   6  -5  113167   10172   1
  -5   6  -4  114883   10204  -2
   6  -5   4  114883   10204   1
   6   4   5   98480   10172  -2
   4   6  -5   98480   10172   1
   4  -5   6  105315   10172  -2
  -5   4  -6  105315   10172   1
   6  -4   5  115138   10172  -2
  -4   6  -5  115138   10172   1
   6  -4   5  105569   10172  -2
  -4   6  -5  105569   10172   1
   4  -5   6  113516   10172  -2
  -5   4  -6  113516   10172   1
   6  -4   5  121050   10172  -2
  -4   6  -5  121050   10172   1
  -5  -6  -4  112499   10172  -2
  -6  -5   4  112499   10172   1
   4  -5   6  115424   10172  -2
  -5   4  -6  115424   10172   1
   5  -6   4  105283   10172  -2
  -6   5  -4  105283   10172   1
   5  -6   4  115424   10172  -2
  -6   5  -4  115424   10172   1
   6  -4   5  110369   10172  -2
  -4   6  -5  110369   10172   1
   4  -5   6  109829   10172  -2
  -5   4  -6  109829   10172   1
   6   4  -5  107159   10172  -2
   4   6   5  107159   10172   1
  -4  -5  -6  104107   10172  -2
  -5  -4   6  104107   10172   1
   5   6  -4   99530   10172  -2
   6   5   4   99530   10172   1
   6  -4   5  116218   10204  -2
  -4   6  -5  116218   10204   1
   6   4  -5  111387   10172  -2
   4   6   5  111387   10172   1
   5  -6   4  100324   10172  -2
  -6   5  -4  100324   10172   1
   6  -4   5  120891   10172  -2
  -4   6  -5  120891   10172   1
  -6  -4  -5  109543   10172  -2
  -4  -6   5  109543   10172   1
   5  -6   4  100229   10204  -2
  -6   5  -4  100229   10204   1
   5  -6   4  117172   10172  -2
  -6   5  -4  117172   10172   1
  -5   1  -6    4514     477  -2
   1  -5   6    4514     477   1
   1  -6  -5    4546     445  -2
  -6   1   5    4546     445   1
  -6  -5   1    4673     477  -2
  -5  -6  -1    4673     477   1
   6  -5  -1    5213     477  -2
  -5   6   1    5213     477   1
   6  -5  -1    4927     445  -2
  -5   6   1    4927     445   1
   6   5   1    4609     445  -2
   5   6  -1    4609     445   1
   6   5   1    4482     445  -2
   5   6  -1    4482     445   1
  -1  -6   5    4101     445  -2
  -6  -1  -5    4101     445   1
  -5   1  -6    4959     445  -2
   1  -5   6    4959     445   1
   5   1   6    5213     477  -2
   1   5  -6    5213     477   1
   6  -5  -1    4768     445  -2
  -5   6   1    4768     445   1
  -5  -1   6    4673     445  -2
  -1  -5  -6    4673     445   1
  -1   6  -5    4959     445  -2
   6  -1   5    4959     445   1
   1   6   5    4196     445  -2
   6   1  -5    4196     445   1
   1   6   5    4355     445  -2
   6   1  -5    4355     445   1
   5  -1  -6    4387     445  -2
  -1   5   6    4387     445   1
   6   5   1    4673     445  -2
   5   6  -1    4673     445   1
   6   5   1    4482     445  -2
   5   6  -1    4482     445   1
   6  -5  -1    4768     477  -2
  -5   6   1    4768     477   1
   6  -5   1    4991     445  -2
  -5   6  -1    4991     445   1
   5  -1   6    4736     445  -2
  -1   5  -6    4736     445   1
   5   1  -6    4959     445  -2
   1   5   6    4959     445   1
   6  -5   1    4736     445  -2
  -5   6  -1    4736     445   1
  -5   1   6    4133     445  -2
   1  -5  -6    4133     445   1
   6  -5   1    5023     477  -2
  -5   6  -1    5023     477   1
   5  -1   6    4578     445  -2
  -1   5  -6    4578     445   1
   1   6  -5    5054     445  -2
   6   1   5    5054     445   1
   1  -6   5    4578     445  -2
  -6   1  -5    4578     445   1
   1  -6   5    4641     445  -2
  -6   1  -5    4641     445   1
   1  -6   5    4069     445  -2
  -6   1  -5    4069     445   1
  -6  -5  -1    4514     477  -2
  -5  -6   1    4514     477   1
   6   5  -1    4323     445  -2
   5   6   1    4323     445   1
   6   5  -1    4609     445  -2
   5   6   1    4609     445   1
  -5  -1  -6    5468     477  -2
  -1  -5   6    5468     477   1
  -1   6   5    4800     445  -2
   6  -1  -5    4800     445   1
  -5  -1  -6    5182     477  -2
  -1  -5   6    5182     477   1
   5   2   6    1431     159  -2
   2   5  -6    1431     159   1
  -5   2  -6    1812     159  -2
   2  -5   6    1812     159   1
   5   2   6    1621     191  -2
   2   5  -6    1621     191   1
   6   5   2    1240     159  -2
   5   6  -2    1240     159   1
   6   5   2    1431     159  -2
   5   6  -2    1431     159   1
   6   5   2    1113     159  -2
   5   6  -2    1113     159   1
   6  -5  -2    1844     191  -2
  -5   6   2    1844     191   1
  -5  -2   6    1558     159  -2
  -2  -5  -6    1558     159   1
   2   6   5    1144     159  -2
   6   2  -5    1144     159   1
   2  -6  -5    1621     159  -2
  -6   2   5    1621     159   1
   5   2   6    1526     159  -2
   2   5  -6    1526     159   1
   6  -5  -2    1589     159  -2
  -5   6   2    1589     159   1
   5  -2  -6    1272     159  -2
  -2   5   6    1272     159   1
  -6  -5   2    1240     191  -2
  -5  -6  -2    1240     191   1
   5  -2  -6    1081     159  -2
  -2   5   6    1081     159   1
   6   5  -2    1081     159  -2
   5   6   2    1081     159   1
   2   6  -5    1399     159  -2
   6   2   5    1399     159   1
   5   2  -6    1431     159  -2
   2   5   6    1431     159   1
  -6  -5  -2    1589     191  -2
  -5  -6   2    1589     191   1
   6  -5   2    1717     159  -2
  -5   6  -2    1717     159   1
   2  -6   5    1907     159  -2
  -6   2  -5    1907     159   1
   2  -6   5    1653     159  -2
  -6   2  -5    1653     159   1
  -5  -2  -6    1589     191  -2
  -2  -5   6    1589     191   1
  -5  -2  -6    1462     191  -2
  -2  -5   6    1462     191   1
  -5   2   6    1208     159  -2
   2  -5  -6    1208     159   1
   5  -2   6    1812     191  -2
  -2   5  -6    1812     191   1
   5  -2   6    1939     191  -2
  -2   5  -6    1939     191   1
  -6  -5   3   13860    1240  -2
  -5  -6  -3   13860    1240   1
   3   6   5   13923    1240  -2
   6   3  -5   13923    1240   1
   3   6   5   12238    1240  -2
   6   3  -5   12238    1240   1
   3  -6  -5   13892    1240  -2
  -6   3   5   13892    1240   1
  -3  -6   5   11762    1240  -2
  -6  -3  -5   11762    1240   1
   6  -5  -3   11285    1240  -2
  -5   6   3   11285    1240   1
  -5  -3   6   13828    1240  -2
  -3  -5  -6   13828    1240   1
  -3   6  -5   14654    1272  -2
   6  -3   5   14654    1272   1
   6   5   3   15544    1240  -2
   5   6  -3   15544    1240   1
   6   5   3   14241    1240  -2
   5   6  -3   14241    1240   1
   5   3   6   12080    1240  -2
   3   5  -6   12080    1240   1
   5  -3  -6   13129    1240  -2
  -3   5   6   13129    1240   1
  -5   3  -6   15163    1272  -2
   3  -5   6   15163    1272   1
  -5   3  -6   14941    1240  -2
   3  -5   6   14941    1240   1
   5   3   6   11889    1240  -2
   3   5  -6   11889    1240   1
   6   5   3   13701    1240  -2
   5   6  -3   13701    1240   1
   5   3  -6   12684    1240  -2
   3   5   6   12684    1240   1
   5   3  -6   12938    1240  -2
   3   5   6   12938    1240   1
   5  -3   6   13923    1240  -2
  -3   5  -6   13923    1240   1
   5  -3   6   13192    1240  -2
  -3   5  -6   13192    1240   1
   5  -3   6   14305    1240  -2
  -3   5  -6   14305    1240   1
   6   5  -3   12779    1240  -2
   5   6   3   12779    1240   1
  -5  -3  -6   11921    1240  -2
  -3  -5   6   11921    1240   1
   6  -5   3   13319    1272  -2
  -5   6  -3   13319    1272   1
   6  -5   3   13605    1240  -2
  -5   6  -3   13605    1240   1
   6  -5   3   14019    1240  -2
  -5   6  -3   14019    1240   1
  -3  -6  -5   12080    1240  -2
  -6  -3   5   12080    1240   1
   3  -6   5   14082    1240  -2
  -6   3  -5   14082    1240   1
   3  -6   5   13224    1240  -2
  -6   3  -5   13224    1240   1
   3  -6   5   13510    1240  -2
  -6   3  -5   13510    1240   1
   3  -6   5   13637    1240  -2
  -6   3  -5   13637    1240   1
   4   6   5    2925     254  -2
   6   4  -5    2925     254   1
  -4   6  -5    2257     254  -2
   6  -4   5    2257     254   1
   4   6   5    2479     223  -2
   6   4  -5    2479     223   1
  -6   5  -4    1939     254  -2
   5  -6   4    1939     254   1
   6   5   4    2670     254  -2
   5   6  -4    2670     254   1
   4  -6  -5    2893     254  -2
  -6   4   5    2893     254   1
   5   4   6    2956     254  -2
   4   5  -6    2956     254   1
   5   4   6    2766     223  -2
   4   5  -6    2766     223   1
  -5   4  -6    1939     254  -2
   4  -5   6    1939     254   1
   6   5   4    3115     254  -2
   5   6  -4    3115     254   1
   6  -5  -4    2479     254  -2
  -5   6   4    2479     254   1
   5   4   6    2193     223  -2
   4   5  -6    2193     223   1
   6   5   4    2670     254  -2
   5   6  -4    2670     254   1
   5  -4  -6    2766     223  -2
  -4   5   6    2766     223   1
   5  -4  -6    2734     254  -2
  -4   5   6    2734     254   1
   5  -4   6    2003     223  -2
  -4   5  -6    2003     223   1
   5  -4   6    2289     254  -2
  -4   5  -6    2289     254   1
   6  -5   4    2034     254  -2
  -5   6  -4    2034     254   1
   6  -5   4    2066     254  -2
  -5   6  -4    2066     254   1
   4  -6   5    2257     254  -2
  -6   4  -5    2257     254   1
   4  -6   5    1971     254  -2
  -6   4  -5    1971     254   1
   4  -6   5    2130     254  -2
  -6   4  -5    2130     254   1
   4  -6   5    2034     254  -2
  -6   4  -5    2034     254   1
   4  -6   5    2193     223  -2
  -6   4  -5    2193     223   1
   6  -5   4    2193     254  -2
  -5   6  -4    2193     254   1
  -5  -6   5   72954    6485  -2
  -6  -5  -5   72954    6485   1
   6   5   5   69458    6485  -2
   5   6  -5   69458    6485   1
   6   5   5   78200    6485  -2
   5   6  -5   78200    6485   1
   6   5   5   78104    6485  -2
   5   6  -5   78104    6485   1
   5   5   6   75307    6485  -2
   5   5  -6   75307    6485   1
   5  -6  -5   77436    6485  -2
  -6   5   5   77436    6485   1
  -6  -5   5   69171    6485  -2
  -5  -6  -5   69171    6485   1
   5   6   5   69362    6485  -2
   6   5  -5   69362    6485   1
  -5  -5   6   70093    6485  -2
  -5  -5  -6   70093    6485   1
   5   5   6   69362    6485  -2
   5   5  -6   69362    6485   1
  -6   5  -5   64816    6485  -2
   5  -6   5   64816    6485   1
  -5   5  -6   64117    6485  -2
   5  -5   6   64117    6485   1
  -5   6  -5   71905    6485  -2
   6  -5   5   71905    6485   1
   5   6   5   62973    6485  -2
   6   5  -5   62973    6485   1
   5  -5  -6   60557    6485  -2
  -5   5   6   60557    6485   1
   5  -5  -6   69807    6485  -2
  -5   5   6   69807    6485   1
   5   5   6   70189    6485  -2
   5   5  -6   70189    6485   1
   5   6   5   64944    6485  -2
   6   5  -5   64944    6485   1
   6  -5  -5   65802    6485  -2
  -5   6   5   65802    6485   1
   6  -5   5   72764    6485  -2
  -5   6  -5   72764    6485   1
   6  -5   5   62719    6485  -2
  -5   6  -5   62719    6485   1
  -5  -6  -5   65961    6485  -2
  -6  -5   5   65961    6485   1
   6  -5   5   73336    6485  -2
  -5   6  -5   73336    6485   1
   5  -5   6   66120    6485  -2
  -5   5  -6   66120    6485   1
   5  -5   6   71174    6485  -2
  -5   5  -6   71174    6485   1
   5  -6   5   74989    6485  -2
  -6   5  -5   74989    6485   1
   6  -5   5   69617    6485  -2
  -5   6  -5   69617    6485   1
  -5  -5  -6   70825    6485  -2
  -5  -5   6   70825    6485   1
   5   5  -6   71301    6485  -2
   5   5   6   71301    6485   1
   5  -6   5   68186    6485  -2
  -6   5  -5   68186    6485   1
   5  -6   5   76451    6485  -2
  -6   5  -5   76451    6485   1
   5  -6   5   72255    6485  -2
  -6   5  -5   72255    6485   1
   5  -6   5   72319    6485  -2
  -6   5  -5   72319    6485   1
   6   5  -5   67423    6485  -2
   5   6   5   67423    6485   1
   5  -5   6   75752    6485  -2
  -5   5  -6   75752    6485   1
   5  -5   6   74067    6485  -2
  -5   5  -6   74067    6485   1
   6  -5   5   69998    6485  -2
  -5   6  -5   69998    6485   1
  -6  -5  -5   76896    6485  -2
  -5  -6   5   76896    6485   1
   5   6  -5   67550    6485  -2
   6   5   5   67550    6485   1
  -6  -6   0  311526   31089  -2
  -6  -6   0  311526   31089   1
   0  -6   6  334541   31057  -2
  -6   0  -6  334541   31057   1
   6  -6   0  340009   31089  -2
  -6   6   0  340009   31089   1
  -6   0  -6  358414   31089  -2
   0  -6   6  358414   31089   1
  -6   0  -6  347320   31089  -2
   0  -6   6  347320   31089   1
   6   0   6  312734   31057  -2
   0   6  -6  312734   31057   1
   0   6   6  334319   31057  -2
   6   0  -6  334319   31057   1
   0   6   6  338991   31057  -2
   6   0  -6  338991   31057   1
   0   6  -6  359718   31089  -2
   6   0   6  359718   31089   1
   6   6   0  344046   31057  -2
   6   6   0  344046   31057   1
  -6  -6   1    5340     477  -2
  -6  -6  -1    5340     477   1
  -1  -6   6    5340     477  -2
  -6  -1  -6    5340     477   1
  -1  -6   6    5277     445  -2
  -6  -1  -6    5277     445   1
   1   6   6    5086     445  -2
   6   1  -6    5086     445   1
   6  -6  -1    4991     445  -2
  -6   6   1    4991     445   1
   6   6   1    3815     445  -2
   6   6  -1    3815     445   1
   6  -6  -1    5245     477  -2
  -6   6   1    5245     477   1
   6  -6  -1    5468     477  -2
  -6   6   1    5468     477   1
  -6   1  -6    4291     477  -2
   1  -6   6    4291     477   1
  -6   1  -6    4228     477  -2
   1  -6   6    4228     477   1
  -1   6  -6    4355     477  -2
   6  -1   6    4355     477   1
   1   6   6    5023     445  -2
   6   1  -6    5023     445   1
   6   1   6    5468     445  -2
   1   6  -6    5468     445   1
   6   1   6    5340     477  -2
   1   6  -6    5340     477   1
   6  -1  -6    4546     477  -2
  -1   6   6    4546     477   1
   6  -1  -6    4705     477  -2
  -1   6   6    4705     477   1
   6   1   6    4927     445  -2
   1   6  -6    4927     445   1
  -6   1   6    4101     445  -2
   1  -6  -6    4101     445   1
   1  -6   6    4228     445  -2
  -6   1  -6    4228     445   1
  -6  -1  -6    5436     477  -2
  -1  -6   6    5436     477   1
   6  -6   1    4578     477  -2
  -6   6  -1    4578     477   1
   6   1  -6    4069     445  -2
   1   6   6    4069     445   1
   6  -1   6    4609     477  -2
  -1   6  -6    4609     477   1
  -1   6   6    4101     445  -2
   6  -1  -6    4101     445   1
  -6  -1  -6    5118     477  -2
  -1  -6   6    5118     477   1
   6  -1   6    4482     477  -2
  -1   6  -6    4482     477   1
   1   6  -6    5404     477  -2
   6   1   6    5404     477   1
   6  -6   1    4069     445  -2
  -6   6  -1    4069     445   1
   6  -6   1    5023     477  -2
  -6   6  -1    5023     477   1
   6  -6   1    5086     445  -2
  -6   6  -1    5086     445   1
   6   6  -1    4546     445  -2
   6   6   1    4546     445   1
   6   6  -1    5086     445  -2
   6   6   1    5086     445   1
  -6  -6   2   17102    1621  -2
  -6  -6  -2   17102    1621   1
  -2  -6   6   14877    1621  -2
  -6  -2  -6   14877    1621   1
  -2  -6   6   16307    1589  -2
  -6  -2  -6   16307    1589   1
   6   2   6   18501    1589  -2
   2   6  -6   18501    1589   1
   6   6   2   18755    1621  -2
   6   6  -2   18755    1621   1
   2  -6  -6   18024    1621  -2
  -6   2   6   18024    1621   1
   6   6   2   15799    1589  -2
   6   6  -2   15799    1589   1
   6   6   2   17515    1621  -2
   6   6  -2   17515    1621   1
  -2   6  -6   17611    1621  -2
   6  -2   6   17611    1621   1
   2   6   6   15322    1589  -2
   6   2  -6   15322    1589   1
   6  -6  -2   19518    1621  -2
  -6   6   2   19518    1621   1
   6  -6  -2   17420    1621  -2
  -6   6   2   17420    1621   1
   6  -6  -2   19232    1589  -2
  -6   6   2   19232    1589   1
  -6   2  -6   15640    1621  -2
   2  -6   6   15640    1621   1
  -6  -2   6   17579    1589  -2
  -2  -6  -6   17579    1589   1
   6   2   6   19296    1589  -2
   2   6  -6   19296    1589   1
   2   6   6   16244    1589  -2
   6   2  -6   16244    1589   1
  -6   2  -6   17166    1621  -2
   2  -6   6   17166    1621   1
   6  -2  -6   15227    1621  -2
  -2   6   6   15227    1621   1
   6  -2  -6   16816    1621  -2
  -2   6   6   16816    1621   1
   6   6   2   18501    1621  -2
   6   6  -2   18501    1621   1
   6   2   6   19137    1621  -2
   2   6  -6   19137    1621   1
   6  -2   6   16244    1589  -2
  -2   6  -6   16244    1589   1
   6  -2   6   17357    1621  -2
  -2   6  -6   17357    1621   1
  -6  -2  -6   19105    1621  -2
  -2  -6   6   19105    1621   1
   2  -6   6   16880    1621  -2
  -6   2  -6   16880    1621   1
   2  -6   6   17166    1589  -2
  -6   2  -6   17166    1589   1
  -6   2   6   15227    1589  -2
   2  -6  -6   15227    1589   1
   6   2  -6   18628    1621  -2
   2   6   6   18628    1621   1
   6   2  -6   19613    1589  -2
   2   6   6   19613    1589   1
  -2   6   6   16721    1589  -2
   6  -2  -6   16721    1589   1
   6  -6   2   16180    1621  -2
  -6   6  -2   16180    1621   1
   6  -6   2   17611    1589  -2
  -6   6  -2   17611    1589   1
   6  -2   6   15958    1621  -2
  -2   6  -6   15958    1621   1
   2   6  -6   18628    1621  -2
   6   2   6   18628    1621   1
   2  -6   6   18278    1589  -2
  -6   2  -6   18278    1589   1
   6  -6   2   17547    1621  -2
  -6   6  -2   17547    1621   1
   6  -6   2   16593    1621  -2
  -6   6  -2   16593    1621   1
   6   6  -2   15703    1589  -2
   6   6   2   15703    1589   1
  -6  -6   3    7152     636  -2
  -6  -6  -3    7152     636   1
   3   6   6    5817     636  -2
   6   3  -6    5817     636   1
   3   6   6    6358     636  -2
   6   3  -6    6358     636   1
   3   6   6    5976     636  -2
   6   3  -6    5976     636   1
   6   3   6    5531     636  -2
   3   6  -6    5531     636   1
   3  -6  -6    7438     636  -2
  -6   3   6    7438     636   1
   3  -6  -6    7343     636  -2
  -6   3   6    7343     636   1
   6   3   6    6199     636  -2
   3   6  -6    6199     636   1
  -6  -3   6    7534     636  -2
  -3  -6  -6    7534     636   1
  -6   3  -6    6866     636  -2
   3  -6   6    6866     636   1
  -6   3  -6    6072     668  -2
   3  -6   6    6072     668   1
   6  -3  -6    6167     636  -2
  -3   6   6    6167     636   1
  -3   6  -6    7502     668  -2
   6  -3   6    7502     668   1
   6  -3  -6    6644     636  -2
  -3   6   6    6644     636   1
   6   6   3    7311     636  -2
   6   6  -3    7311     636   1
   6  -3   6    6390     636  -2
  -3   6  -6    6390     636   1
   6  -3   6    7089     668  -2
  -3   6  -6    7089     668   1
   6  -3   6    6294     668  -2
  -3   6  -6    6294     668   1
   6  -6   3    6199     636  -2
  -6   6  -3    6199     636   1
   6  -6   3    6485     636  -2
  -6   6  -3    6485     636   1
   6   3  -6    7534     636  -2
   3   6   6    7534     636   1
   6  -3   6    6962     636  -2
  -3   6  -6    6962     636   1
  -3  -6  -6    5913     636  -2
  -6  -3   6    5913     636   1
   3  -6   6    7883     636  -2
  -6   3  -6    7883     636   1
   3  -6   6    7057     636  -2
  -6   3  -6    7057     636   1
   3  -6   6    7152     636  -2
  -6   3  -6    7152     636   1
   3  -6   6    6866     636  -2
  -6   3  -6    6866     636   1
   6  -6   3    6453     668  -2
  -6   6  -3    6453     668   1
   6  -6   3    6517     636  -2
  -6   6  -3    6517     636   1
   6   6  -3    7343     636  -2
   6   6   3    7343     636   1
   4   6   6    7661     636  -2
   6   4  -6    7661     636   1
  -4  -6   6    8011     668  -2
  -6  -4  -6    8011     668   1
   6   4   6    6771     636  -2
   4   6  -6    6771     636   1
   6   6   4    7280     668  -2
   6   6  -4    7280     668   1
   6   6   4    6803     636  -2
   6   6  -4    6803     636   1
   6   6   4    7280     668  -2
   6   6  -4    7280     668   1
   6   6   4    6676     668  -2
   6   6  -4    6676     668   1
   4  -6  -6    6262     668  -2
  -6   4   6    6262     668   1
   4  -6  -6    6262     668  -2
  -6   4   6    6262     668   1
   6   4   6    6008     636  -2
   4   6  -6    6008     636   1
   6   4   6    6421     668  -2
   4   6  -6    6421     668   1
   6  -6  -4    6676     668  -2
  -6   6   4    6676     668   1
   6   6   4    7152     668  -2
   6   6  -4    7152     668   1
  -4   6  -6    6835     668  -2
   6  -4   6    6835     668   1
   6  -4   6    6644     668  -2
  -4   6  -6    6644     668   1
   6  -4   6    7788     668  -2
  -4   6  -6    7788     668   1
   6  -4   6    8201     636  -2
  -4   6  -6    8201     636   1
   6  -6   4    6930     668  -2
  -6   6  -4    6930     668   1
   6  -6   4    7089     668  -2
  -6   6  -4    7089     668   1
  -6  -4  -6    6294     668  -2
  -4  -6   6    6294     668   1
   6   4  -6    6644     668  -2
   4   6   6    6644     668   1
   6   4  -6    6644     636  -2
   4   6   6    6644     636   1
   6  -4   6    7025     668  -2
  -4   6  -6    7025     668   1
  -6  -6  -4    6644     668  -2
  -6  -6   4    6644     668   1
   6  -6   4    6898     668  -2
  -6   6  -4    6898     668   1
   6  -6   4    7566     668  -2
  -6   6  -4    7566     668   1
   4  -6   6    6962     668  -2
  -6   4  -6    6962     668   1
   4  -6   6    6580     668  -2
  -6   4  -6    6580     668   1
   4  -6   6    6866     668  -2
  -6   4  -6    6866     668   1
   4  -6   6    6326     636  -2
  -6   4  -6    6326     636   1
   6  -6   4    7534     636  -2
  -6   6  -4    7534     636   1
  -6  -6   5    6707     699  -2
  -6  -6  -5    6707     699   1
  -6  -6   5    7597     699  -2
  -6  -6  -5    7597     699   1
   5   6   6    7184     699  -2
   6   5  -6    7184     699   1
  -5  -6   6    7311     699  -2
  -6  -5  -6    7311     699   1
  -5  -6   6    7438     699  -2
  -6  -5  -6    7438     699   1
   6   6   5    7089     699  -2
   6   6  -5    7089     699   1
   6   6   5    7057     699  -2
   6   6  -5    7057     699   1
   6   6   5    7502     699  -2
   6   6  -5    7502     699   1
   6   6   5    7693     699  -2
   6   6  -5    7693     699   1
   6   6   5    7089     699  -2
   6   6  -5    7089     699   1
  -6  -5   6    7661     699  -2
  -5  -6  -6    7661     699   1
   5  -6  -6    7534     699  -2
  -6   5   6    7534     699   1
   5  -6  -6    8583     699  -2
  -6   5   6    8583     699   1
   6   5   6    7025     699  -2
   5   6  -6    7025     699   1
   6  -5  -6    7089     699  -2
  -5   6   6    7089     699   1
   5   6   6    7248     699  -2
   6   5  -6    7248     699   1
   6   5   6    6930     699  -2
   5   6  -6    6930     699   1
   6   5   6    6835     699  -2
   5   6  -6    6835     699   1
   6  -6  -5    7184     699  -2
  -6   6   5    7184     699   1
   5   6   6    7693     699  -2
   6   5  -6    7693     699   1
   6  -6   5    7979     731  -2
  -6   6  -5    7979     731   1
   5  -6   6    8233     699  -2
  -6   5  -6    8233     699   1
   6  -5   6    7121     699  -2
  -5   6  -6    7121     699   1
   6  -5   6    7883     699  -2
  -5   6  -6    7883     699   1
   6  -5   6    8106     699  -2
  -5   6  -6    8106     699   1
  -6  -5  -6    7502     699  -2
  -5  -6   6    7502     699   1
   6  -6   5    7693     699  -2
  -6   6  -5    7693     699   1
   6  -6   5    7820     699  -2
  -6   6  -5    7820     699   1
   6  -6   5    8138     731  -2
  -6   6  -5    8138     731   1
   6   5  -6    7502     699  -2
   5   6   6    7502     699   1
  -6  -6  -5    7756     699  -2
  -6  -6   5    7756     699   1
   6  -5   6    7311     731  -2
  -5   6  -6    7311     731   1
   6  -5   6    7597     699  -2
  -5   6  -6    7597     699   1
   5   6  -6    6930     699  -2
   6   5   6    6930     699   1
  -5  -6  -6    7216     699  -2
  -6  -5   6    7216     699   1
   5  -6   6    7788     699  -2
  -6   5  -6    7788     699   1
   5  -6   6    7756     699  -2
  -6   5  -6    7756     699   1
   5  -6   6    6103     699  -2
  -6   5  -6    6103     699   1
   5  -6   6    7216     699  -2
  -6   5  -6    7216     699   1
   6   6  -5    6993     699  -2
   6   6   5    6993     699   1
  -6  -6   6     699      95  -2
  -6  -6  -6     699      95   1
  -6  -6   6     668      95  -2
  -6  -6  -6     668      95   1
   6   6   6     572      95  -2
   6   6  -6     572      95   1
   6   6   6     477      95  -2
   6   6  -6     477      95   1
   6   6   6     890     127  -2
   6   6  -6     890     127   1
   6   6   6     445      95  -2
   6   6  -6     445      95   1
   6  -6  -6     636      64  -2
  -6   6   6     636      64   1
   6  -6  -6     763     127  -2
  -6   6   6     763     127   1
   6  -6   6     445      95  -2
  -6   6  -6     445      95   1
   6  -6   6     668     127  -2
  -6   6  -6     668     127   1
   6  -6   6     382      95  -2
  -6   6  -6     382      95   1
   6  -6   6     540     127  -2
  -6   6  -6     540     127   1
   6  -6   6     445      95  -2
  -6   6  -6     445      95   1
  -6  -6  -6     731     127  -2
  -6  -6   6     731     127   1
   6  -6   6     572     127  -2
  -6   6  -6     572     127   1
   6   6  -6     763      95  -2
   6   6   6     763      95   1
   7  -1  -1  267436   25335  -2
  -1   7   1  267436   25335   1
   1   1   7  254943   25335  -2
   1   1  -7  254943   25335   1
  -7   1  -1  270265   25335  -2
   1  -7   1  270265   25335   1
  -7  -1   1  285333   25335  -2
  -1  -7  -1  285333   25335   1
   1  -1  -7  299161   25335  -2
  -1   1   7  299161   25335   1
   1   7   1  282281   25335  -2
   7   1  -1  282281   25335   1
   1   7   1  295251   25335  -2
   7   1  -1  295251   25335   1
   7  -1  -1  260252   25335  -2
  -1   7   1  260252   25335   1
   7   1   1  270360   25335  -2
   1   7  -1  270360   25335   1
  -7  -1  -1  286922   25335  -2
  -1  -7   1  286922   25335   1
  -7  -1  -1  279420   25335  -2
  -1  -7   1  279420   25335   1
   7   1  -1  279070   25335  -2
   1   7   1  279070   25335   1
  -7   1   1  253862   25335  -2
   1  -7  -1  253862   25335   1
   7  -1  -2   14305    1208  -2
  -1   7   2   14305    1208   1
   7  -1  -2   13733    1208  -2
  -1   7   2   13733    1208   1
   2   7   1   14496    1208  -2
   7   2  -1   14496    1208   1
   7   1   2   11380    1208  -2
   1   7  -2   11380    1208   1
   2   7   1   14750    1208  -2
   7   2  -1   14750    1208   1
   7   1   2   11031    1240  -2
   1   7  -2   11031    1240   1
  -2   7  -1   13129    1208  -2
   7  -2   1   13129    1208   1
   7   1   2   11952    1208  -2
   1   7  -2   11952    1208   1
   7   1   2   11317    1208  -2
   1   7  -2   11317    1208   1
   7   1   2   11793    1208  -2
   1   7  -2   11793    1208   1
   1   2   7   12175    1208  -2
   2   1  -7   12175    1208   1
  -1   2  -7   13701    1240  -2
   2  -1   7   13701    1240   1
   2  -7  -1   11539    1208  -2
  -7   2   1   11539    1208   1
  -7  -1   2   14114    1208  -2
  -1  -7  -2   14114    1208   1
  -1   2  -7   13923    1208  -2
   2  -1   7   13923    1208   1
  -2   7  -1   13129    1208  -2
   7  -2   1   13129    1208   1
   1  -2  -7   14051    1208  -2
  -2   1   7   14051    1208   1
  -7   1  -2   13923    1208  -2
   1  -7   2   13923    1208   1
  -1  -2   7   11762    1208  -2
  -2  -1  -7   11762    1208   1
  -7   1  -2   13828    1208  -2
   1  -7   2   13828    1208   1
  -1   2   7   13160    1208  -2
   2  -1  -7   13160    1208   1
  -7  -1  -2   11221    1208  -2
  -1  -7   2   11221    1208   1
  -7  -1  -2   13002    1208  -2
  -1  -7   2   13002    1208   1
   2   7  -1   14654    1208  -2
   7   2   1   14654    1208   1
   1  -2   7   13160    1208  -2
  -2   1  -7   13160    1208   1
   2  -7   1   12652    1208  -2
  -7   2  -1   12652    1208   1
   7  -1   2   13574    1240  -2
  -1   7  -2   13574    1240   1
   7   1  -2   13701    1240  -2
   1   7   2   13701    1240   1
   7   1  -2   12811    1208  -2
   1   7   2   12811    1208   1
   7  -1   2   13415    1240  -2
  -1   7  -2   13415    1240   1
   7  -1   2   12398    1240  -2
  -1   7  -2   12398    1240   1
   7   1   3    1780     159  -2
   1   7  -3    1780     159   1
   1   3   7    1558     159  -2
   3   1  -7    1558     159   1
   7  -1  -3    1558     191  -2
  -1   7   3    1558     191   1
   7   1   3    1748     159  -2
   1   7  -3    1748     159   1
  -1  -3   7    1494     191  -2
  -3  -1  -7    1494     191   1
  -7   1  -3    1335     159  -2
   1  -7   3    1335     159   1
   7   1   3    1653     191  -2
   1   7  -3    1653     191   1
   7   1   3    1907     159  -2
   1   7  -3    1907     159   1
  -1   3  -7    1717     191  -2
   3  -1   7    1717     191   1
   1   3   7    1462     191  -2
   3   1  -7    1462     191   1
   3   7   1    1971     159  -2
   7   3  -1    1971     159   1
  -3  -7   1    1812     191  -2
  -7  -3  -1    1812     191   1
   7   1   3    1621     191  -2
   1   7  -3    1621     191   1
   3  -7  -1    1399     159  -2
  -7   3   1    1399     159   1
   1  -3  -7    1939     191  -2
  -3   1   7    1939     191   1
   3   7  -1    1844     159  -2
   7   3   1    1844     159   1
  -7  -1  -3    1589     159  -2
  -1  -7   3    1589     159   1
   3  -7   1    1272     159  -2
  -7   3  -1    1272     159   1
   7  -1   3    1876     191  -2
  -1   7  -3    1876     191   1
   7  -1   3    1367     191  -2
  -1   7  -3    1367     191   1
   3   7  -1    1971     159  -2
   7   3   1    1971     159   1
   1  -3   7    1494     159  -2
  -3   1  -7    1494     159   1
   7  -1   3    1335     191  -2
  -1   7  -3    1335     191   1
  -7  -1  -3    1494     191  -2
  -1  -7   3    1494     191   1
   7  -1   3    1431     159  -2
  -1   7  -3    1431     159   1
  -4  -7   1   13510    1144  -2
  -7  -4  -1   13510    1144   1
   7  -1  -4   13574    1113  -2
  -1   7   4   13574    1113   1
  -1  -4   7   11189    1113  -2
  -4  -1  -7   11189    1113   1
   4  -7  -1   10236    1113  -2
  -7   4   1   10236    1113   1
   4   7   1   12556    1113  -2
   7   4  -1   12556    1113   1
   4   7   1   11889    1113  -2
   7   4  -1   11889    1113   1
  -1   4  -7   13637    1144  -2
   4  -1   7   13637    1144   1
   4   7   1   12080    1113  -2
   7   4  -1   12080    1113   1
   7   1   4   10649    1113  -2
   1   7  -4   10649    1113   1
   7   1   4   10109    1113  -2
   1   7  -4   10109    1113   1
   7   1   4   11094    1113  -2
   1   7  -4   11094    1113   1
   1   4   7   12652    1113  -2
   4   1  -7   12652    1113   1
   7   1   4   11889    1113  -2
   1   7  -4   11889    1113   1
  -7   1  -4   12874    1113  -2
   1  -7   4   12874    1113   1
  -1  -4   7   10458    1113  -2
  -4  -1  -7   10458    1113   1
  -7   1  -4   13764    1144  -2
   1  -7   4   13764    1144   1
   1  -4  -7   10872    1113  -2
  -4   1   7   10872    1113   1
   1  -4   7   11889    1113  -2
  -4   1  -7   11889    1113   1
   7   1  -4   11348    1113  -2
   1   7   4   11348    1113   1
   1  -4   7   12366    1113  -2
  -4   1  -7   12366    1113   1
   4  -7   1   13097    1113  -2
  -7   4  -1   13097    1113   1
   7  -1   4   12684    1144  -2
  -1   7  -4   12684    1144   1
   7  -1   4   13701    1144  -2
  -1   7  -4   13701    1144   1
   4   7  -1   12238    1113  -2
   7   4   1   12238    1113   1
  -7  -1  -4   10204    1113  -2
  -1  -7   4   10204    1113   1
  -4  -7  -1   11380    1144  -2
  -7  -4   1   11380    1144   1
   7   1  -4   11571    1113  -2
   1   7   4   11571    1113   1
   4  -7   1   12016    1113  -2
  -7   4  -1   12016    1113   1
   7   1   5   64340    5404  -2
   1   7  -5   64340    5404   1
   7   1   5   64340    5404  -2
   1   7  -5   64340    5404   1
   7   1   5   62083    5404  -2
   1   7  -5   62083    5404   1
  -5  -7   1   57823    5404  -2
  -7  -5  -1   57823    5404   1
   7   1   5   63831    5404  -2
   1   7  -5   63831    5404   1
   5  -7  -1   59603    5404  -2
  -7   5   1   59603    5404   1
   5  -7  -1   62814    5404  -2
  -7   5   1   62814    5404   1
  -1  -5   7   52165    5404  -2
  -5  -1  -7   52165    5404   1
   7  -1  -5   55407    5404  -2
  -1   7   5   55407    5404   1
  -1  -5   7   55979    5404  -2
  -5  -1  -7   55979    5404   1
   5   7   1   66215    5404  -2
   7   5  -1   66215    5404   1
   7   1   5   61065    5404  -2
   1   7  -5   61065    5404   1
   5   7   1   59063    5404  -2
   7   5  -1   59063    5404   1
  -7  -1   5   59413    5404  -2
  -1  -7  -5   59413    5404   1
   7   1   5   63958    5404  -2
   1   7  -5   63958    5404   1
   7  -1  -5   50607    5404  -2
  -1   7   5   50607    5404   1
   1   5   7   54867    5404  -2
   5   1  -7   54867    5404   1
  -7   1  -5   56869    5404  -2
   1  -7   5   56869    5404   1
  -7   1  -5   52960    5404  -2
   1  -7   5   52960    5404   1
  -1  -5   7   55280    5404  -2
  -5  -1  -7   55280    5404   1
   5   7   1   66565    5404  -2
   7   5  -1   66565    5404   1
  -1   5  -7   59603    5404  -2
   5  -1   7   59603    5404   1
   7   1  -5   60684    5404  -2
   1   7   5   60684    5404   1
   7  -1   5   50798    5404  -2
  -1   7  -5   50798    5404   1
   5   7  -1   57601    5404  -2
   7   5   1   57601    5404   1
   5  -7   1   55089    5404  -2
  -7   5  -1   55089    5404   1
  -1   5   7   62687    5404  -2
   5  -1  -7   62687    5404   1
   5  -7   1   54231    5404  -2
  -7   5  -1   54231    5404   1
   1  -5   7   54613    5404  -2
  -5   1  -7   54613    5404   1
   1  -5   7   61352    5404  -2
  -5   1  -7   61352    5404   1
   7  -1   5   51720    5404  -2
  -1   7  -5   51720    5404   1
   7  -1   5   52514    5404  -2
  -1   7  -5   52514    5404   1
   5  -7   1   56583    5404  -2
  -7   5  -1   56583    5404   1
   1   5  -7   64213    5404  -2
   5   1   7   64213    5404   1
   5  -7   1   57537    5404  -2
  -7   5  -1   57537    5404   1
   7  -1   5   61383    5404  -2
  -1   7  -5   61383    5404   1
   7  -1   5   57092    5404  -2
  -1   7  -5   57092    5404   1
   7   1  -5   66946    5404  -2
   1   7   5   66946    5404   1
   7  -1   5   55503    5404  -2
  -1   7  -5   55503    5404   1
   1   6   7   42596    3592  -2
   6   1  -7   42596    3592   1
  -6  -7   1   39672    3592  -2
  -7  -6  -1   39672    3592   1
   6  -7  -1   33346    3592  -2
  -7   6   1   33346    3592   1
   6   7   1   38973    3592  -2
   7   6  -1   38973    3592   1
  -7   1  -6   41007    3592  -2
   1  -7   6   41007    3592   1
   7   1   6   36557    3560  -2
   1   7  -6   36557    3560   1
   6  -7  -1   40149    3592  -2
  -7   6   1   40149    3592   1
  -1   6  -7   42692    3592  -2
   6  -1   7   42692    3592   1
   7   1   6   34745    3592  -2
   1   7  -6   34745    3592   1
   6   7   1   39545    3592  -2
   7   6  -1   39545    3592   1
  -1  -6   7   36429    3592  -2
  -6  -1  -7   36429    3592   1
   7  -1  -6   45330    3592  -2
  -1   7   6   45330    3592   1
   1   6   7   44663    3592  -2
   6   1  -7   44663    3592   1
  -1  -6   7   37765    3592  -2
  -6  -1  -7   37765    3592   1
   6   7   1   38051    3592  -2
   7   6  -1   38051    3592   1
   6   7   1   36143    3592  -2
   7   6  -1   36143    3592   1
  -7  -1   6   36938    3592  -2
  -1  -7  -6   36938    3592   1
   6  -7  -1   33982    3592  -2
  -7   6   1   33982    3592   1
  -1  -6   7   37542    3592  -2
  -6  -1  -7   37542    3592   1
   6  -7  -1   37510    3592  -2
  -7   6   1   37510    3592   1
   7   1   6   34745    3592  -2
   1   7  -6   34745    3592   1
   1  -6   7   35571    3592  -2
  -6   1  -7   35571    3592   1
   7  -1   6   40753    3592  -2
  -1   7  -6   40753    3592   1
   7  -1   6   42183    3592  -2
  -1   7  -6   42183    3592   1
   7  -1   6   42310    3592  -2
  -1   7  -6   42310    3592   1
   7   1  -6   38337    3592  -2
   1   7   6   38337    3592   1
  -1   6   7   35826    3592  -2
   6  -1  -7   35826    3592   1
  -1   6   7   38051    3592  -2
   6  -1  -7   38051    3592   1
   6  -7   1   41484    3592  -2
  -7   6  -1   41484    3592   1
   6  -7   1   40848    3592  -2
  -7   6  -1   40848    3592   1
   1   6  -7   37192    3592  -2
   6   1   7   37192    3592   1
   7  -1   6   43709    3592  -2
  -1   7  -6   43709    3592   1
   1  -6   7   35953    3592  -2
  -6   1  -7   35953    3592   1
  -1   6   7   38305    3592  -2
   6  -1  -7   38305    3592   1
   6   7  -1   45521    3592  -2
   7   6   1   45521    3592   1
   1  -6   7   40562    3592  -2
  -6   1  -7   40562    3592   1
   6  -7   1   38973    3592  -2
  -7   6  -1   38973    3592   1
   7   1  -6   36811    3592  -2
   1   7   6   36811    3592   1
   7  -1   6   41261    3592  -2
  -1   7  -6   41261    3592   1
  -7  -1  -6   33759    3592  -2
  -1  -7   6   33759    3592   1
   6  -7   1   36716    3592  -2
  -7   6  -1   36716    3592   1
   2   7   0     159      95   1
  -2  -7   0     127      64   1
   0  -2   7     127      64   1
   2   7   0     127      64   1
   0   2  -7     254      64   1
  -2   7   0     127      64   1
  -2   7   0      64      32   1
  -2  -7   0     127      64   1
   0  -2  -7     127      64   1
   2   7   0     191      64   1
  -2   7   0      95      64   1
   0  -2   7     191      64   1
  -7   2  -1    6898     604  -2
   2  -7   1    6898     604   1
  -2   1  -7    6898     636  -2
   1  -2   7    6898     636   1
  -7   2  -1    6707     604  -2
   2  -7   1    6707     604   1
  -2  -1   7    6103     604  -2
  -1  -2  -7    6103     604   1
  -2   1  -7    6866     604  -2
   1  -2   7    6866     604   1
   7   2   1    6230     604  -2
   2   7  -1    6230     604   1
   7  -2  -1    5658     604  -2
  -2   7   1    5658     604   1
   7  -2  -1    5881     604  -2
  -2   7   1    5881     604   1
   1   7   2    7883     636  -2
   7   1  -2    7883     636   1
   7   2   1    5913     636  -2
   2   7  -1    5913     636   1
   7   2   1    5754     604  -2
   2   7  -1    5754     604   1
   7   2   1    6294     604  -2
   2   7  -1    6294     604   1
   7   2   1    5499     604  -2
   2   7  -1    5499     604   1
  -2   1   7    7470     604  -2
   1  -2  -7    7470     604   1
   2  -1   7    7375     604  -2
  -1   2  -7    7375     604   1
   7  -2   1    6421     604  -2
  -2   7  -1    6421     604   1
   7  -2   1    5913     604  -2
  -2   7  -1    5913     604   1
   7  -2   1    6072     604  -2
  -2   7  -1    6072     604   1
   7   2  -1    6898     636  -2
   2   7   1    6898     636   1
  -7  -2  -1    6453     604  -2
  -2  -7   1    6453     604   1
  -7  -2  -1    5817     604  -2
  -2  -7   1    5817     604   1
   1   7  -2    6612     604  -2
   7   1   2    6612     604   1
   1  -7   2    6262     604  -2
  -7   1  -2    6262     604   1
  -2  -1  -7    6199     604  -2
  -1  -2   7    6199     604   1
   7   2  -1    7375     604  -2
   2   7   1    7375     604   1
  -2  -2   7   14623    1431  -2
  -2  -2  -7   14623    1431   1
   2   7   2   16403    1399  -2
   7   2  -2   16403    1399   1
  -2   2  -7   14941    1431  -2
   2  -2   7   14941    1431   1
  -2   2  -7   15163    1399  -2
   2  -2   7   15163    1399   1
  -7   2  -2   14368    1431  -2
   2  -7   2   14368    1431   1
   7   2   2   17166    1399  -2
   2   7  -2   17166    1399   1
   7   2   2   15799    1431  -2
   2   7  -2   15799    1431   1
   7   2   2   16435    1399  -2
   2   7  -2   16435    1399   1
   7   2   2   17134    1431  -2
   2   7  -2   17134    1431   1
  -7   2  -2   15449    1399  -2
   2  -7   2   15449    1399   1
  -7  -2  -2   16276    1431  -2
  -2  -7   2   16276    1431   1
  -7  -2  -2   15036    1431  -2
  -2  -7   2   15036    1431   1
   7   2  -2   17166    1431  -2
   2   7   2   17166    1431   1
   2  -7   2   14178    1431  -2
  -7   2  -2   14178    1431   1
   7  -2   2   13574    1399  -2
  -2   7  -2   13574    1399   1
   7   2  -2   17229    1399  -2
   2   7   2   17229    1399   1
   2  -2   7   12970    1431  -2
  -2   2  -7   12970    1431   1
   7  -2   2   13637    1431  -2
  -2   7  -2   13637    1431   1
   2   7  -2   14591    1399  -2
   7   2   2   14591    1399   1
   2   2  -7   14464    1399  -2
   2   2   7   14464    1399   1
  -2  -2  -7   14527    1431  -2
  -2  -2   7   14527    1431   1
   7  -2   2   14559    1431  -2
  -2   7  -2   14559    1431   1
  -2   3  -7    9092     922  -2
   3  -2   7    9092     922   1
  -2   3  -7    9441     890  -2
   3  -2   7    9441     890   1
   2  -3  -7   10363     890  -2
  -3   2   7   10363     890   1
  -7  -2   3   10840     922  -2
  -2  -7  -3   10840     922   1
   7  -2  -3    8583     922  -2
  -2   7   3    8583     922   1
   3   7   2    9918     890  -2
   7   3  -2    9918     890   1
   3   7   2   10331     890  -2
   7   3  -2   10331     890   1
   3   7   2   10490     890  -2
   7   3  -2   10490     890   1
  -2  -3   7    9823     890  -2
  -3  -2  -7    9823     890   1
  -3  -7   2    9123     890  -2
  -7  -3  -2    9123     890   1
   2   3   7    9092     922  -2
   3   2  -7    9092     922   1
  -7   2  -3    8869     922  -2
   2  -7   3    8869     922   1
  -7   2  -3    9886     890  -2
   2  -7   3    9886     890   1
   7   2   3   10999     890  -2
   2   7  -3   10999     890   1
   7   2   3   10013     922  -2
   2   7  -3   10013     922   1
   7   2   3    8996     922  -2
   2   7  -3    8996     922   1
   7   2   3   10713     890  -2
   2   7  -3   10713     890   1
   7   2   3   11189     890  -2
   2   7  -3   11189     890   1
   2   3   7    9187     890  -2
   3   2  -7    9187     890   1
   2  -3   7    8646     890  -2
  -3   2  -7    8646     890   1
   7   2  -3   10808     890  -2
   2   7   3   10808     890   1
  -7  -2  -3    9568     922  -2
  -2  -7   3    9568     922   1
  -7  -2  -3    9695     890  -2
  -2  -7   3    9695     890   1
   7  -2   3    8964     922  -2
  -2   7  -3    8964     922   1
   2  -3   7    9219     890  -2
  -3   2  -7    9219     890   1
  -2   3   7    9409     890  -2
   3  -2  -7    9409     890   1
   3  -7   2    8201     890  -2
  -7   3  -2    8201     890   1
   7   2  -3   10140     922  -2
   2   7   3   10140     922   1
   7  -2   3    9092     922  -2
  -2   7  -3    9092     922   1
   7  -2   3    9441     890  -2
  -2   7  -3    9441     890   1
   3  -7   2    7947     890  -2
  -7   3  -2    7947     890   1
   2   4   7    3147     286  -2
   4   2  -7    3147     286   1
   4   7   2    3147     286  -2
   7   4  -2    3147     286   1
  -7   2  -4    2511     286  -2
   2  -7   4    2511     286   1
   2   4   7    2829     286  -2
   4   2  -7    2829     286   1
   4   7   2    2861     286  -2
   7   4  -2    2861     286   1
   7   2   4    3306     286  -2
   2   7  -4    3306     286   1
   7   2   4    3560     286  -2
   2   7  -4    3560     286   1
   4   7   2    2829     286  -2
   7   4  -2    2829     286   1
   7   2   4    3465     286  -2
   2   7  -4    3465     286   1
   4  -7  -2    2988     286  -2
  -7   4   2    2988     286   1
  -2  -4   7    2861     286  -2
  -4  -2  -7    2861     286   1
  -7   2  -4    2702     318  -2
   2  -7   4    2702     318   1
   7   2   4    3052     318  -2
   2   7  -4    3052     318   1
  -7   2  -4    2638     286  -2
   2  -7   4    2638     286   1
   7  -2  -4    2988     318  -2
  -2   7   4    2988     318   1
  -2   4  -7    2925     318  -2
   4  -2   7    2925     318   1
  -4  -7   2    3274     318  -2
  -7  -4  -2    3274     318   1
  -7  -2   4    3401     286  -2
  -2  -7  -4    3401     286   1
   2  -4  -7    2925     286  -2
  -4   2   7    2925     286   1
   7  -2  -4    2893     286  -2
  -2   7   4    2893     286   1
   7   2   4    2925     318  -2
   2   7  -4    2925     318   1
   7  -2   4    3052     286  -2
  -2   7  -4    3052     286   1
   4  -7   2    2416     286  -2
  -7   4  -2    2416     286   1
   2  -4   7    2861     286  -2
  -4   2  -7    2861     286   1
   7   2  -4    2893     318  -2
   2   7   4    2893     318   1
   4  -7   2    2638     286  -2
  -7   4  -2    2638     286   1
   7  -2   4    2448     286  -2
  -2   7  -4    2448     286   1
   7  -2   4    3020     286  -2
  -2   7  -4    3020     286   1
   7  -2   4    2448     318  -2
  -2   7  -4    2448     318   1
   7  -2   4    2479     318  -2
  -2   7  -4    2479     318   1
  -7  -2  -4    3529     318  -2
  -2  -7   4    3529     318   1
   7   2  -4    2988     286  -2
   2   7   4    2988     286   1
   4  -7   2    2734     286  -2
  -7   4  -2    2734     286   1
  -5  -7   2   97908    8011  -2
  -7  -5  -2   97908    8011   1
  -7   2  -5   84112    8011  -2
   2  -7   5   84112    8011   1
  -2  -5   7   83953    7979  -2
  -5  -2  -7   83953    7979   1
   5   7   2   94698    7979  -2
   7   5  -2   94698    7979   1
   7   2   5   94094    7979  -2
   2   7  -5   94094    7979   1
   7   2   5   89993    7979  -2
   2   7  -5   89993    7979   1
  -7   2  -5   79280    8011  -2
   2  -7   5   79280    8011   1
   7   2   5   92981    7979  -2
   2   7  -5   92981    7979   1
  -7  -2   5   90915    7979  -2
  -2  -7  -5   90915    7979   1
  -2   5  -7   84716    8011  -2
   5  -2   7   84716    8011   1
   2   5   7   80298    7979  -2
   5   2  -7   80298    7979   1
   7  -2  -5   95397    8011  -2
  -2   7   5   95397    8011   1
  -2  -5   7   79026    7979  -2
  -5  -2  -7   79026    7979   1
  -2  -5   7   83158    8011  -2
  -5  -2  -7   83158    8011   1
   2  -5  -7   81950    7979  -2
  -5   2   7   81950    7979   1
   5   7   2   95429    7979  -2
   7   5  -2   95429    7979   1
   5   7   2   86782    7979  -2
   7   5  -2   86782    7979   1
   7  -2  -5   88467    8011  -2
  -2   7   5   88467    8011   1
   5  -7  -2   81664    7979  -2
  -7   5   2   81664    7979   1
   2   5   7   91868    7979  -2
   5   2  -7   91868    7979   1
   2   5   7   87545    7979  -2
   5   2  -7   87545    7979   1
   5  -7   2   81315    8011  -2
  -7   5  -2   81315    8011   1
   5  -7   2   85638    7979  -2
  -7   5  -2   85638    7979   1
   5  -7   2   81823    7979  -2
  -7   5  -2   81823    7979   1
   5  -7   2   83890    7979  -2
  -7   5  -2   83890    7979   1
   7  -2   5   77373    8011  -2
  -2   7  -5   77373    8011   1
  -7  -2  -5   86464    8011  -2
  -2  -7   5   86464    8011   1
   7  -2   5   89484    7979  -2
  -2   7  -5   89484    7979   1
   2  -5   7   85257    8011  -2
  -5   2  -7   85257    8011   1
   7   2  -5   88403    8011  -2
   2   7   5   88403    8011   1
   5   7  -2   97845    7979  -2
   7   5   2   97845    7979   1
   7  -2   5   84907    8011  -2
  -2   7  -5   84907    8011   1
   7  -2   5   80838    7979  -2
  -2   7  -5   80838    7979   1
   7  -2   5   91805    7979  -2
  -2   7  -5   91805    7979   1
   2  -5   7   79249    7979  -2
  -5   2  -7   79249    7979   1
  -2   5   7   78931    7979  -2
   5  -2  -7   78931    7979   1
   7   2  -5   94634    7979  -2
   2   7   5   94634    7979   1
  -7   2  -6   30294    2766  -2
   2  -7   6   30294    2766   1
   6   7   2   31979    2734  -2
   7   6  -2   31979    2734   1
   2   6   7   30135    2734  -2
   6   2  -7   30135    2734   1
   6   7   2   29690    2734  -2
   7   6  -2   29690    2734   1
   6   7   2   27052    2734  -2
   7   6  -2   27052    2734   1
   6   7   2   27592    2734  -2
   7   6  -2   27592    2734   1
  -7  -2   6   28641    2734  -2
  -2  -7  -6   28641    2734   1
   7   2   6   29976    2734  -2
   2   7  -6   29976    2734   1
   2   6   7   32043    2734  -2
   6   2  -7   32043    2734   1
   6  -7  -2   26130    2734  -2
  -7   6   2   26130    2734   1
   6  -7  -2   28133    2734  -2
  -7   6   2   28133    2734   1
  -6  -7   2   30358    2766  -2
  -7  -6  -2   30358    2766   1
   2   6   7   31820    2734  -2
   6   2  -7   31820    2734   1
   7   2   6   28546    2734  -2
   2   7  -6   28546    2734   1
  -2  -6   7   26671    2734  -2
  -6  -2  -7   26671    2734   1
  -2  -6   7   26416    2734  -2
  -6  -2  -7   26416    2734   1
  -2  -6   7   28133    2734  -2
  -6  -2  -7   28133    2734   1
   6   7   2   28355    2734  -2
   7   6  -2   28355    2734   1
   7   2   6   27116    2734  -2
   2   7  -6   27116    2734   1
   7  -2  -6   30485    2734  -2
  -2   7   6   30485    2734   1
  -2   6  -7   30453    2766  -2
   6  -2   7   30453    2766   1
   7  -2  -6   33505    2734  -2
  -2   7   6   33505    2734   1
  -2   6   7   28228    2734  -2
   6  -2  -7   28228    2734   1
   7  -2   6   31471    2766  -2
  -2   7  -6   31471    2766   1
   7   2  -6   26734    2734  -2
   2   7   6   26734    2734   1
   7  -2   6   30898    2766  -2
  -2   7  -6   30898    2766   1
   7  -2   6   32488    2766  -2
  -2   7  -6   32488    2766   1
   6  -7   2   28324    2766  -2
  -7   6  -2   28324    2766   1
   6  -7   2   29627    2734  -2
  -7   6  -2   29627    2734   1
   6  -7   2   32043    2734  -2
  -7   6  -2   32043    2734   1
   2  -6   7   31661    2734  -2
  -6   2  -7   31661    2734   1
   7   2  -6   29563    2734  -2
   2   7   6   29563    2734   1
   6  -7   2   30835    2734  -2
  -7   6  -2   30835    2734   1
   2  -6   7   27815    2734  -2
  -6   2  -7   27815    2734   1
   6   7  -2   31979    2734  -2
   7   6   2   31979    2734   1
   2  -6   7   29818    2734  -2
  -6   2  -7   29818    2734   1
   7  -2   6   34745    2734  -2
  -2   7  -6   34745    2734   1
   2   6  -7   27561    2734  -2
   6   2   7   27561    2734   1
  -2   6   7   29976    2734  -2
   6  -2  -7   29976    2734   1
  -7  -2  -6   27116    2734  -2
  -2  -7   6   27116    2734   1
   7  -3  -1    6485     636  -2
  -3   7   1    6485     636   1
   1   7   3    5213     604  -2
   7   1  -3    5213     604   1
  -3   1  -7    6580     604  -2
   1  -3   7    6580     604   1
  -3  -1   7    6930     604  -2
  -1  -3  -7    6930     604   1
   7   3   1    7216     604  -2
   3   7  -1    7216     604   1
   7   3   1    6485     604  -2
   3   7  -1    6485     604   1
  -3   1  -7    5976     636  -2
   1  -3   7    5976     636   1
   7   3   1    6771     604  -2
   3   7  -1    6771     604   1
   7   3   1    7089     636  -2
   3   7  -1    7089     636   1
   7  -3  -1    6421     604  -2
  -3   7   1    6421     604   1
   3   1   7    6676     636  -2
   1   3  -7    6676     636   1
  -7  -3   1    5531     604  -2
  -3  -7  -1    5531     604   1
   7   3   1    6739     604  -2
   3   7  -1    6739     604   1
   3  -1   7    5944     604  -2
  -1   3  -7    5944     604   1
   7   3  -1    5372     604  -2
   3   7   1    5372     604   1
  -3  -1  -7    6676     604  -2
  -1  -3   7    6676     604   1
   1   7  -3    5595     604  -2
   7   1   3    5595     604   1
  -3   1   7    5277     604  -2
   1  -3  -7    5277     604   1
   3   1  -7    7248     604  -2
   1   3   7    7248     604   1
  -7  -3  -1    6835     636  -2
  -3  -7   1    6835     636   1
  -3  -1  -7    6326     636  -2
  -1  -3   7    6326     636   1
   7  -3   1    6835     636  -2
  -3   7  -1    6835     636   1
   7  -3   1    7152     636  -2
  -3   7  -1    7152     636   1
  -1   7   3    6739     604  -2
   7  -1  -3    6739     604   1
  -7  -3  -1    6739     604  -2
  -3  -7   1    6739     604   1
   3   2   7   61256    5531  -2
   2   3  -7   61256    5531   1
   7   3   2   55471    5531  -2
   3   7  -2   55471    5531   1
  -3  -2   7   61956    5531  -2
  -2  -3  -7   61956    5531   1
  -7  -3   2   60811    5531  -2
  -3  -7  -2   60811    5531   1
   7   3   2   63005    5531  -2
   3   7  -2   63005    5531   1
   7   3   2   59571    5531  -2
   3   7  -2   59571    5531   1
   7   3   2   56265    5531  -2
   3   7  -2   56265    5531   1
  -3   2  -7   59444    5531  -2
   2  -3   7   59444    5531   1
   3   2   7   58522    5531  -2
   2   3  -7   58522    5531   1
   3   2   7   66629    5531  -2
   2   3  -7   66629    5531   1
   7  -3  -2   67582    5531  -2
  -3   7   2   67582    5531   1
   7   3   2   56456    5531  -2
   3   7  -2   56456    5531   1
  -2   7  -3   60048    5531  -2
   7  -2   3   60048    5531   1
  -2  -7   3   66629    5531  -2
  -7  -2  -3   66629    5531   1
   3  -2  -7   64403    5531  -2
  -2   3   7   64403    5531   1
  -3   2  -7   63926    5531  -2
   2  -3   7   63926    5531   1
   2   7   3   59254    5531  -2
   7   2  -3   59254    5531   1
  -7  -3  -2   51879    5531  -2
  -3  -7   2   51879    5531   1
  -3  -2  -7   68091    5531  -2
  -2  -3   7   68091    5531   1
   2  -7   3   52578    5531  -2
  -7   2  -3   52578    5531   1
   2  -7   3   59158    5531  -2
  -7   2  -3   59158    5531   1
   3  -2   7   55789    5531  -2
  -2   3  -7   55789    5531   1
   3   2  -7   58014    5531  -2
   2   3   7   58014    5531   1
  -3  -2  -7   66597    5531  -2
  -2  -3   7   66597    5531   1
   3  -2   7   54136    5531  -2
  -2   3  -7   54136    5531   1
  -3   2   7   58332    5531  -2
   2  -3  -7   58332    5531   1
   7   3  -2   55407    5531  -2
   3   7   2   55407    5531   1
   7   3  -2   57887    5531  -2
   3   7   2   57887    5531   1
   7  -3   2   58077    5531  -2
  -3   7  -2   58077    5531   1
   7  -3   2   59381    5531  -2
  -3   7  -2   59381    5531   1
   7  -3   2   63227    5531  -2
  -3   7  -2   63227    5531   1
  -7  -3  -2   52800    5531  -2
  -3  -7   2   52800    5531   1
   2   7  -3   66629    5531  -2
   7   2   3   66629    5531   1
  -3   3  -7    2766     254  -2
   3  -3   7    2766     254   1
  -3  -7   3    1939     254  -2
  -7  -3  -3    1939     254   1
   7   3   3    2638     223  -2
   3   7  -3    2638     223   1
   3   7   3    2193     223  -2
   7   3  -3    2193     223   1
   7   3   3    2734     223  -2
   3   7  -3    2734     223   1
   7  -3  -3    2066     254  -2
  -3   7   3    2066     254   1
   7  -3  -3    2384     254  -2
  -3   7   3    2384     254   1
  -3   3  -7    2384     254  -2
   3  -3   7    2384     254   1
   3   3   7    2321     223  -2
   3   3  -7    2321     223   1
   3   3   7    2511     254  -2
   3   3  -7    2511     254   1
   3   3   7    2130     223  -2
   3   3  -7    2130     223   1
   3  -3  -7    1907     223  -2
  -3   3   7    1907     223   1
  -7  -3   3    2066     254  -2
  -3  -7  -3    2066     254   1
   7   3  -3    2352     223  -2
   3   7   3    2352     223   1
  -3  -3  -7    2225     254  -2
  -3  -3   7    2225     254   1
  -3   3   7    2034     223  -2
   3  -3  -7    2034     223   1
  -3  -3  -7    2384     254  -2
  -3  -3   7    2384     254   1
   3  -3   7    2638     254  -2
  -3   3  -7    2638     254   1
   3  -3   7    2607     223  -2
  -3   3  -7    2607     223   1
   7   3  -3    2130     254  -2
   3   7   3    2130     254   1
   3   7  -3    2098     223  -2
   7   3   3    2098     223   1
  -3  -4   7   78549    8138  -2
  -4  -3  -7   78549    8138   1
  -7   3  -4   81474    8138  -2
   3  -7   4   81474    8138   1
   3  -4  -7   98830    8138  -2
  -4   3   7   98830    8138   1
   4   7   3   94412    8138  -2
   7   4  -3   94412    8138   1
   7   3   4   82586    8138  -2
   3   7  -4   82586    8138   1
   3   4   7   88308    8138  -2
   4   3  -7   88308    8138   1
   4  -7  -3   81887    8138  -2
  -7   4   3   81887    8138   1
   7  -3  -4   84780    8138  -2
  -3   7   4   84780    8138   1
   4   7   3   91519    8138  -2
   7   4  -3   91519    8138   1
  -7   3  -4   86655    8170  -2
   3  -7   4   86655    8170   1
   7   3   4   97082    8138  -2
   3   7  -4   97082    8138   1
  -7   3  -4   84557    8138  -2
   3  -7   4   84557    8138   1
   7  -3  -4   87513    8138  -2
  -3   7   4   87513    8138   1
  -7  -3   4   95461    8138  -2
  -3  -7  -4   95461    8138   1
  -3   4  -7   89516    8138  -2
   4  -3   7   89516    8138   1
   3   4   7   91964    8138  -2
   4   3  -7   91964    8138   1
   7   3   4   97273    8138  -2
   3   7  -4   97273    8138   1
  -4  -7   3   93013    8138  -2
  -7  -4  -3   93013    8138   1
   4   7   3   96700    8138  -2
   7   4  -3   96700    8138   1
   4   7   3   94253    8138  -2
   7   4  -3   94253    8138   1
   7  -3   4   85892    8138  -2
  -3   7  -4   85892    8138   1
   4  -7   3   80456    8138  -2
  -7   4  -3   80456    8138   1
   3  -4   7   89707    8138  -2
  -4   3  -7   89707    8138   1
   7   3  -4   92918    8138  -2
   3   7   4   92918    8138   1
  -3  -4  -7   87196    8201  -2
  -4  -3   7   87196    8201   1
   7   3  -4   96510    8138  -2
   3   7   4   96510    8138   1
  -7  -3  -4   89166    8138  -2
  -3  -7   4   89166    8138   1
   7  -3   4   83985    8170  -2
  -3   7  -4   83985    8170   1
   3  -4   7   89230    8138  -2
  -4   3  -7   89230    8138   1
  -3  -4  -7   86623    8138  -2
  -4  -3   7   86623    8138   1
   4  -7   3   85098    8138  -2
  -7   4  -3   85098    8138   1
   4   7  -3   89357    8138  -2
   7   4   3   89357    8138   1
   4  -7   3   83953    8138  -2
  -7   4  -3   83953    8138   1
   4  -7   3   82872    8138  -2
  -7   4  -3   82872    8138   1
   7  -3   4   75784    8138  -2
  -3   7  -4   75784    8138   1
  -5  -7   3   86178    7534  -2
  -7  -5  -3   86178    7534   1
   5  -7  -3   86750    7534  -2
  -7   5   3   86750    7534   1
   3   5   7   83127    7502  -2
   5   3  -7   83127    7502   1
  -7   3  -5   79916    7534  -2
   3  -7   5   79916    7534   1
  -7   3  -5   77691    7534  -2
   3  -7   5   77691    7534   1
   5   7   3   72223    7502  -2
   7   5  -3   72223    7502   1
   5   7   3   72827    7502  -2
   7   5  -3   72827    7502   1
   7  -3  -5   77055    7534  -2
  -3   7   5   77055    7534   1
  -3  -5   7   84811    7534  -2
  -5  -3  -7   84811    7534   1
  -3   5  -7   82841    7534  -2
   5  -3   7   82841    7534   1
   7   3   5   74894    7502  -2
   3   7  -5   74894    7502   1
   7   3   5   82555    7502  -2
   3   7  -5   82555    7502   1
   5  -7  -3   90215    7502  -2
  -7   5   3   90215    7502   1
  -3  -5   7   85606    7534  -2
  -5  -3  -7   85606    7534   1
  -3  -5   7   84843    7502  -2
  -5  -3  -7   84843    7502   1
   5   7   3   69871    7502  -2
   7   5  -3   69871    7502   1
   7   3   5   83127    7502  -2
   3   7  -5   83127    7502   1
   3   5   7   83063    7502  -2
   5   3  -7   83063    7502   1
   7   3   5   81092    7502  -2
   3   7  -5   81092    7502   1
   3  -5  -7   75116    7502  -2
  -5   3   7   75116    7502   1
   7  -3  -5   81664    7534  -2
  -3   7   5   81664    7534   1
   3   5   7   84621    7502  -2
   5   3  -7   84621    7502   1
   7   3   5   81664    7502  -2
   3   7  -5   81664    7502   1
   7  -3   5   89612    7534  -2
  -3   7  -5   89612    7534   1
   3  -5   7   86528    7534  -2
  -5   3  -7   86528    7534   1
   5  -7   3   81410    7502  -2
  -7   5  -3   81410    7502   1
   7  -3   5   80615    7534  -2
  -3   7  -5   80615    7534   1
   7   3  -5   70856    7502  -2
   3   7   5   70856    7502   1
  -3  -5  -7   87068    7534  -2
  -5  -3   7   87068    7534   1
   3  -5   7   88944    7502  -2
  -5   3  -7   88944    7502   1
  -7  -3  -5   79376    7534  -2
  -3  -7   5   79376    7534   1
   3  -5   7   83190    7502  -2
  -5   3  -7   83190    7502   1
   7  -3   5   92250    7534  -2
  -3   7  -5   92250    7534   1
   5  -7   3   79662    7534  -2
  -7   5  -3   79662    7534   1
   5  -7   3   87196    7502  -2
  -7   5  -3   87196    7502   1
   5  -7   3   85892    7534  -2
  -7   5  -3   85892    7534   1
   5  -7   3   81569    7534  -2
  -7   5  -3   81569    7534   1
   5   7  -3   78899    7502  -2
   7   5   3   78899    7502   1
   7   3  -5   69617    7534  -2
   3   7   5   69617    7534   1
   6  -7  -3    1049     127  -2
  -7   6   3    1049     127   1
   7   3   6    1017     127  -2
   3   7  -6    1017     127   1
   3   6   7    1494     127  -2
   6   3  -7    1494     127   1
   6  -7  -3    1049     159  -2
  -7   6   3    1049     159   1
   3   6   7    1335     127  -2
   6   3  -7    1335     127   1
  -7   3  -6    1208     159  -2
   3  -7   6    1208     159   1
   6   7   3    1303     159  -2
   7   6  -3    1303     159   1
   7   3   6     954     127  -2
   3   7  -6     954     127   1
   3  -6  -7     954     159  -2
  -6   3   7     954     159   1
   3  -6  -7     827     159  -2
  -6   3   7     827     159   1
  -7  -3   6    1081     127  -2
  -3  -7  -6    1081     127   1
   6   7   3    1208     127  -2
   7   6  -3    1208     127   1
  -3   6  -7     954     159  -2
   6  -3   7     954     159   1
  -3  -6   7    1208     127  -2
  -6  -3  -7    1208     127   1
   7   3   6    1144     127  -2
   3   7  -6    1144     127   1
   6   7   3    1208     159  -2
   7   6  -3    1208     159   1
  -3  -6   7    1462     159  -2
  -6  -3  -7    1462     159   1
  -3  -6   7    1049     159  -2
  -6  -3  -7    1049     159   1
   6   7   3    1272     159  -2
   7   6  -3    1272     159   1
   7  -3  -6    1462     159  -2
  -3   7   6    1462     159   1
   6   7   3    1176     127  -2
   7   6  -3    1176     127   1
   3  -6   7    1049     159  -2
  -6   3  -7    1049     159   1
   7   3  -6    1049     127  -2
   3   7   6    1049     127   1
   7   3  -6     985     159  -2
   3   7   6     985     159   1
  -7  -3  -6     922     159  -2
  -3  -7   6     922     159   1
   7  -3   6    1494     159  -2
  -3   7  -6    1494     159   1
   7  -3   6    1303     159  -2
  -3   7  -6    1303     159   1
  -3   6   7    1017     127  -2
   6  -3  -7    1017     127   1
   7  -3   6    1272     191  -2
  -3   7  -6    1272     191   1
   3  -6   7    1081     127  -2
  -6   3  -7    1081     127   1
   6  -7   3    1081     159  -2
  -7   6  -3    1081     159   1
   6  -7   3    1113     159  -2
  -7   6  -3    1113     159   1
  -3   6   7     954     127  -2
   6  -3  -7     954     127   1
   7  -3   6    1335     127  -2
  -3   7  -6    1335     127   1
   3  -6   7     985     159  -2
  -6   3  -7     985     159   1
   3  -6   7     954     127  -2
  -6   3  -7     954     127   1
   3  -6   7     985     127  -2
  -6   3  -7     985     127   1
   6  -7   3    1462     159  -2
  -7   6  -3    1462     159   1
   6   7  -3    1558     159  -2
   7   6   3    1558     159   1
   6  -7   3    1208     127  -2
  -7   6  -3    1208     127   1
  -4   7   0     127      64   1
   0   4  -7     159      95   1
   0   4  -7      32      32   1
  -4   7   0     127      32   1
  -4  -7   0     127      95   1
   0  -4   7     127      64   1
   0  -4  -7      64      64   1
   7   0  -4     127      64   1
   7   0  -4      95      64   1
  -4   7   0     159      64   1
   4   7   0     127      64   1
   4   7   0     350      95   1
  -4   7   0     127      64   1
   0   4   7     127      64   1
   0  -4   7     127      64   1
   7   0   4     127      64   1
   4   7   0     254      64   1
   7   4   1     509      95  -2
   4   7  -1     509      95   1
   7   4   1     413      64  -2
   4   7  -1     413      64   1
   7  -4  -1     318      95  -2
  -4   7   1     318      95   1
   7   4   1     382      64  -2
   4   7  -1     382      64   1
  -4  -1   7     445      64  -2
  -1  -4  -7     445      64   1
   7  -4  -1     445      95  -2
  -4   7   1     445      95   1
  -7  -4   1     382      95  -2
  -4  -7  -1     382      95   1
  -4   1  -7     668     127  -2
   1  -4   7     668     127   1
  -4   1  -7     509      95  -2
   1  -4   7     509      95   1
   4   1   7     286      95  -2
   1   4  -7     286      95   1
   4   1   7     318      64  -2
   1   4  -7     318      64   1
   1   7   4     445      64  -2
   7   1  -4     445      64   1
   7  -4  -1     350      95  -2
  -4   7   1     350      95   1
   7   4   1     445      64  -2
   4   7  -1     445      64   1
  -1   7  -4     477      95  -2
   7  -1   4     477      95   1
   1  -7  -4     318      95  -2
  -7   1   4     318      95   1
   1   7   4     477      64  -2
   7   1  -4     477      64   1
   7  -4   1     477      64  -2
  -4   7  -1     477      64   1
  -1   7   4     350      64  -2
   7  -1  -4     350      64   1
   4  -1   7     540      64  -2
  -1   4  -7     540      64   1
   7   4  -1     382      64  -2
   4   7   1     382      64   1
  -1   7   4     318      95  -2
   7  -1  -4     318      95   1
   4  -1   7     699      95  -2
  -1   4  -7     699      95   1
   7  -4   1     509      95  -2
  -4   7  -1     509      95   1
  -4  -1  -7     286      95  -2
  -1  -4   7     286      95   1
   7   4  -1     509      64  -2
   4   7   1     509      64   1
   1  -7   4     445      64  -2
  -7   1  -4     445      64   1
  -4  -1  -7     413      95  -2
  -1  -4   7     413      95   1
   1   7  -4     445      64  -2
   7   1   4     445      64   1
  -7  -4  -1     286      95  -2
  -4  -7   1     286      95   1
   4   1  -7     382      64  -2
   1   4   7     382      64   1
   7  -4   1     604      95  -2
  -4   7  -1     604      95   1
   7   4  -1     540      95  -2
   4   7   1     540      95   1
   2  -7  -4    8964     890  -2
  -7   2   4    8964     890   1
  -2   7  -4   10649     922  -2
   7  -2   4   10649     922   1
  -4   2  -7   10713     922  -2
   2  -4   7   10713     922   1
  -4   2  -7   10458     890  -2
   2  -4   7   10458     890   1
   2   7   4   10649     890  -2
   7   2  -4   10649     890   1
   7   4   2    9250     890  -2
   4   7  -2    9250     890   1
   7   4   2   10490     890  -2
   4   7  -2   10490     890   1
   4  -2  -7    9441     890  -2
  -2   4   7    9441     890   1
   4  -2  -7   10649     890  -2
  -2   4   7   10649     890   1
   7   4   2    9346     890  -2
   4   7  -2    9346     890   1
   4   2   7    8424     922  -2
   2   4  -7    8424     922   1
   4   2   7    8742     890  -2
   2   4  -7    8742     890   1
   7  -4  -2    8360     922  -2
  -4   7   2    8360     922   1
   7   4   2    9346     890  -2
   4   7  -2    9346     890   1
  -7  -4   2   10490     922  -2
  -4  -7  -2   10490     922   1
   2   7   4   10268     890  -2
   7   2  -4   10268     890   1
   4   2   7    9092     890  -2
   2   4  -7    9092     890   1
  -4  -2   7    9441     890  -2
  -2  -4  -7    9441     890   1
   7  -4  -2    8233     890  -2
  -4   7   2    8233     890   1
   7   4  -2   10045     922  -2
   4   7   2   10045     922   1
   2   7  -4    9282     890  -2
   7   2   4    9282     890   1
   4  -2   7    9886     890  -2
  -2   4  -7    9886     890   1
   4  -2   7    9918     922  -2
  -2   4  -7    9918     922   1
   7  -4   2    8837     922  -2
  -4   7  -2    8837     922   1
   2  -7   4   10204     890  -2
  -7   2  -4   10204     890   1
   4   2  -7    8488     890  -2
   2   4   7    8488     890   1
  -4  -2  -7    8392     922  -2
  -2  -4   7    8392     922   1
  -4   2   7   10109     890  -2
   2  -4  -7   10109     890   1
   7  -4   2    9568     922  -2
  -4   7  -2    9568     922   1
   7  -4   2    9727     890  -2
  -4   7  -2    9727     890   1
   7   4  -2   10681     890  -2
   4   7   2   10681     890   1
   2  -7   4    9664     890  -2
  -7   2  -4    9664     890   1
  -4  -2  -7    8901     922  -2
  -2  -4   7    8901     922   1
   7   4   3   40276    3656  -2
   4   7  -3   40276    3656   1
  -3  -7   4   46093    3656  -2
  -7  -3  -4   46093    3656   1
   3  -7  -4   34173    3656  -2
  -7   3   4   34173    3656   1
   4   3   7   41929    3656  -2
   3   4  -7   41929    3656   1
   7   4   3   38019    3656  -2
   4   7  -3   38019    3656   1
  -4   3  -7   34268    3656  -2
   3  -4   7   34268    3656   1
   3   7   4   40753    3656  -2
   7   3  -4   40753    3656   1
   7  -4  -3   38718    3656  -2
  -4   7   3   38718    3656   1
   7  -4  -3   41071    3656  -2
  -4   7   3   41071    3656   1
  -4  -3   7   41166    3656  -2
  -3  -4  -7   41166    3656   1
   4   3   7   43900    3656  -2
   3   4  -7   43900    3656   1
   4  -3  -7   39163    3656  -2
  -3   4   7   39163    3656   1
   4  -3  -7   43963    3656  -2
  -3   4   7   43963    3656   1
   7   4   3   39577    3656  -2
   4   7  -3   39577    3656   1
   7   4   3   41643    3656  -2
   4   7  -3   41643    3656   1
  -7  -4   3   44281    3656  -2
  -4  -7  -3   44281    3656   1
   3  -7  -4   40181    3656  -2
  -7   3   4   40181    3656   1
  -3   7  -4   36302    3656  -2
   7  -3   4   36302    3656   1
   7   4   3   38432    3656  -2
   4   7  -3   38432    3656   1
  -4   3  -7   36302    3656  -2
   3  -4   7   36302    3656   1
   3   7   4   43963    3656  -2
   7   3  -4   43963    3656   1
   4   3   7   44631    3688  -2
   3   4  -7   44631    3688   1
   3  -7   4   35857    3656  -2
  -7   3  -4   35857    3656   1
   4  -3   7   37002    3656  -2
  -3   4  -7   37002    3656   1
   7   4  -3   43995    3656  -2
   4   7   3   43995    3656   1
   7   4  -3   43709    3656  -2
   4   7   3   43709    3656   1
  -4  -3  -7   43296    3656  -2
  -3  -4   7   43296    3656   1
   3  -7   4   37924    3656  -2
  -7   3  -4   37924    3656   1
   7  -4   3   36366    3656  -2
  -4   7  -3   36366    3656   1
   4   3  -7   40689    3656  -2
   3   4   7   40689    3656   1
   7  -4   3   37129    3656  -2
  -4   7  -3   37129    3656   1
  -4  -3  -7   39322    3688  -2
  -3  -4   7   39322    3688   1
   4  -3   7   37796    3656  -2
  -3   4  -7   37796    3656   1
   3  -7   4   34808    3656  -2
  -7   3  -4   34808    3656   1
   3  -7   4   35126    3656  -2
  -7   3  -4   35126    3656   1
  -4   3   7   39990    3656  -2
   3  -4  -7   39990    3656   1
  -3  -7  -4   40562    3656  -2
  -7  -3   4   40562    3656   1
   7  -4   3   36525    3656  -2
  -4   7  -3   36525    3656   1
   3  -7   4   36938    3656  -2
  -7   3  -4   36938    3656   1
  -4  -4   7    5340     477  -2
  -4  -4  -7    5340     477   1
   4  -7  -4    5340     477  -2
  -7   4   4    5340     477   1
   4  -7  -4    5372     477  -2
  -7   4   4    5372     477   1
   7  -4  -4    5309     477  -2
  -4   7   4    5309     477   1
  -4   7  -4    5340     477  -2
   7  -4   4    5340     477   1
  -7   4  -4    4641     477  -2
   4  -7   4    4641     477   1
   7   4   4    4450     445  -2
   4   7  -4    4450     445   1
   7   4   4    4133     477  -2
   4   7  -4    4133     477   1
   4   7   4    3751     445  -2
   7   4  -4    3751     445   1
  -4  -4   7    5023     477  -2
  -4  -4  -7    5023     477   1
   7   4   4    4514     477  -2
   4   7  -4    4514     477   1
   7  -4  -4    4736     477  -2
  -4   7   4    4736     477   1
   7   4   4    4609     445  -2
   4   7  -4    4609     445   1
   7   4   4    4482     477  -2
   4   7  -4    4482     477   1
  -4  -7   4    4768     477  -2
  -7  -4  -4    4768     477   1
   4   4   7    4736     445  -2
   4   4  -7    4736     445   1
  -4   4  -7    4323     477  -2
   4  -4   7    4323     477   1
   4   4   7    4546     445  -2
   4   4  -7    4546     445   1
   4   4   7    5468     477  -2
   4   4  -7    5468     477   1
   7  -4   4    5372     477  -2
  -4   7  -4    5372     477   1
  -7  -4  -4    4228     477  -2
  -4  -7   4    4228     477   1
   4  -4   7    4768     477  -2
  -4   4  -7    4768     477   1
   4  -7   4    5372     477  -2
  -7   4  -4    5372     477   1
   7   4  -4    3878     477  -2
   4   7   4    3878     477   1
   4  -7   4    5150     477  -2
  -7   4  -4    5150     477   1
  -4  -4  -7    4927     477  -2
  -4  -4   7    4927     477   1
   7  -4   4    5086     477  -2
  -4   7  -4    5086     477   1
   4  -7   4    5086     477  -2
  -7   4  -4    5086     477   1
   4  -4   7    4927     477  -2
  -4   4  -7    4927     477   1
   4  -7   4    5658     477  -2
  -7   4  -4    5658     477   1
   7  -4   4    5436     477  -2
  -4   7  -4    5436     477   1
   4   7  -4    4355     445  -2
   7   4   4    4355     445   1
   4  -4   7    4578     445  -2
  -4   4  -7    4578     445   1
   4   5   7    2925     254  -2
   5   4  -7    2925     254   1
   7   4   5    2321     254  -2
   4   7  -5    2321     254   1
   4   5   7    3179     254  -2
   5   4  -7    3179     254   1
   5   7   4    2670     254  -2
   7   5  -4    2670     254   1
   7   4   5    2257     254  -2
   4   7  -5    2257     254   1
   7   4   5    2384     254  -2
   4   7  -5    2384     254   1
  -4   5  -7    2670     350  -2
   5  -4   7    2670     350   1
   5  -7  -4    2448     254  -2
  -7   5   4    2448     254   1
   4  -5  -7    2734     254  -2
  -5   4   7    2734     254   1
   7   4   5    2225     254  -2
   4   7  -5    2225     254   1
  -4  -5   7    2384     254  -2
  -5  -4  -7    2384     254   1
   5   7   4    2988     286  -2
   7   5  -4    2988     286   1
   5   7   4    2607     254  -2
   7   5  -4    2607     254   1
   5   7   4    2797     254  -2
   7   5  -4    2797     254   1
   7   4   5    2352     286  -2
   4   7  -5    2352     286   1
   7  -4  -5    3020     286  -2
  -4   7   5    3020     286   1
  -5  -7   4    2925     286  -2
  -7  -5  -4    2925     286   1
  -5  -7   4    3084     286  -2
  -7  -5  -4    3084     286   1
  -4  -5   7    2734     286  -2
  -5  -4  -7    2734     286   1
   4  -5  -7    2956     286  -2
  -5   4   7    2956     286   1
   4   5   7    2988     254  -2
   5   4  -7    2988     254   1
   7  -4  -5    2956     286  -2
  -4   7   5    2956     286   1
   5   7   4    3020     286  -2
   7   5  -4    3020     286   1
  -7  -4   5    2829     286  -2
  -4  -7  -5    2829     286   1
   5  -7  -4    2670     286  -2
  -7   5   4    2670     286   1
   5  -7   4    2130     254  -2
  -7   5  -4    2130     254   1
   7   4  -5    2702     286  -2
   4   7   5    2702     286   1
   7  -4   5    2289     286  -2
  -4   7  -5    2289     286   1
   7  -4   5    2448     286  -2
  -4   7  -5    2448     286   1
   5  -7   4    2193     254  -2
  -7   5  -4    2193     254   1
   4  -5   7    2479     254  -2
  -5   4  -7    2479     254   1
  -5  -7  -4    3052     254  -2
  -7  -5   4    3052     254   1
   4  -5   7    2162     254  -2
  -5   4  -7    2162     254   1
   4  -5   7    2448     286  -2
  -5   4  -7    2448     286   1
   4  -5   7    2352     254  -2
  -5   4  -7    2352     254   1
   5  -7   4    2130     286  -2
  -7   5  -4    2130     286   1
   7   4  -5    2797     254  -2
   4   7   5    2797     254   1
  -4   5   7    3179     254  -2
   5  -4  -7    3179     254   1
   7  -4   5    2893     254  -2
  -4   7  -5    2893     254   1
   5  -7   4    2384     254  -2
  -7   5  -4    2384     254   1
   7  -4   5    2416     286  -2
  -4   7  -5    2416     286   1
  -7  -4  -5    2416     286  -2
  -4  -7   5    2416     286   1
   5   7  -4    2988     254  -2
   7   5   4    2988     254   1
  -4  -5  -7    2797     286  -2
  -5  -4   7    2797     286   1
   5  -7   4    2098     254  -2
  -7   5  -4    2098     254   1
   6   7   4  106968    9854  -2
   7   6  -4  106968    9854   1
   4  -6  -7  107159    9854  -2
  -6   4   7  107159    9854   1
   6   7   4   98417    9854  -2
   7   6  -4   98417    9854   1
   4   6   7  110751    9854  -2
   6   4  -7  110751    9854   1
   6  -7  -4  105506    9854  -2
  -7   6   4  105506    9854   1
   6  -7  -4  112944    9854  -2
  -7   6   4  112944    9854   1
  -4  -6   7  109448    9854  -2
  -6  -4  -7  109448    9854   1
   6   7   4  107095    9854  -2
   7   6  -4  107095    9854   1
  -6  -7   4  113040    9854  -2
  -7  -6  -4  113040    9854   1
   4   6   7  111387    9854  -2
   6   4  -7  111387    9854   1
   4   6   7   93299    9854  -2
   6   4  -7   93299    9854   1
   7   4   6  111959    9854  -2
   4   7  -6  111959    9854   1
   4  -6  -7  106459    9854  -2
  -6   4   7  106459    9854   1
   6   7   4  108398    9854  -2
   7   6  -4  108398    9854   1
  -7  -4   6   99816    9854  -2
  -4  -7  -6   99816    9854   1
   7   4   6  105506    9854  -2
   4   7  -6  105506    9854   1
  -6  -7   4  106300    9854  -2
  -7  -6  -4  106300    9854   1
   7   4   6  107604    9854  -2
   4   7  -6  107604    9854   1
   6   7   4  103630    9854  -2
   7   6  -4  103630    9854   1
   7  -4  -6  110528    9854  -2
  -4   7   6  110528    9854   1
   7  -4  -6  106936    9886  -2
  -4   7   6  106936    9886   1
   6   7   4  104043    9854  -2
   7   6  -4  104043    9854   1
  -4  -6   7  113262    9886  -2
  -6  -4  -7  113262    9886   1
   4  -6   7  112817    9854  -2
  -6   4  -7  112817    9854   1
   7  -4   6  116123    9854  -2
  -4   7  -6  116123    9854   1
   6  -7   4  103090    9886  -2
  -7   6  -4  103090    9886   1
   4  -6   7   92600    9854  -2
  -6   4  -7   92600    9854   1
   4  -6   7  117903    9854  -2
  -6   4  -7  117903    9854   1
   7  -4   6  121241    9854  -2
  -4   7  -6  121241    9854   1
  -7   4   6  106142    9854  -2
   4  -7  -6  106142    9854   1
   7  -4   6  110401    9886  -2
  -4   7  -6  110401    9886   1
  -7  -4  -6  108398    9886  -2
  -4  -7   6  108398    9886   1
   6   7  -4  101755    9854  -2
   7   6   4  101755    9854   1
   6   7  -4   94348    9854  -2
   7   6   4   94348    9854   1
   7   4  -6  103567    9854  -2
   4   7   6  103567    9854   1
  -4  -6  -7  108430    9854  -2
  -6  -4   7  108430    9854   1
  -4   6   7  105824    9854  -2
   6  -4  -7  105824    9854   1
  -4   6   7   97050    9854  -2
   6  -4  -7   97050    9854   1
   4  -6   7   96764    9854  -2
  -6   4  -7   96764    9854   1
   4  -6   7  105538    9854  -2
  -6   4  -7  105538    9854   1
   4  -6   7  113739    9854  -2
  -6   4  -7  113739    9854   1
   6   7  -4  110592    9854  -2
   7   6   4  110592    9854   1
   6  -7   4  108685    9854  -2
  -7   6  -4  108685    9854   1
   6  -7   4  117395    9854  -2
  -7   6  -4  117395    9854   1
   4  -6   7   94666    9854  -2
  -6   4  -7   94666    9854   1
   7  -4   6  122099    9854  -2
  -4   7  -6  122099    9854   1
   7  -4   6  108526    9886  -2
  -4   7  -6  108526    9886   1
   7  -4   6  102168    9854  -2
  -4   7  -6  102168    9854   1
   7  -4   6  114088    9886  -2
  -4   7  -6  114088    9886   1
   6  -7   4  115519    9854  -2
  -7   6  -4  115519    9854   1
   6  -7   4  108208    9854  -2
  -7   6  -4  108208    9854   1
   6  -7   4   97400    9854  -2
  -7   6  -4   97400    9854   1
   7   4  -6  103567    9854  -2
   4   7   6  103567    9854   1
   7   5   1   48636    4419  -2
   5   7  -1   48636    4419   1
   5   1   7   45140    4387  -2
   1   5  -7   45140    4387   1
   7   5   1   47079    4419  -2
   5   7  -1   47079    4419   1
   5  -1  -7   45108    4419  -2
  -1   5   7   45108    4419   1
   1   7   5   42819    4387  -2
   7   1  -5   42819    4387   1
   5   1   7   45044    4419  -2
   1   5  -7   45044    4419   1
  -5   1  -7   49526    4419  -2
   1  -5   7   49526    4419   1
  -7  -5   1   44599    4419  -2
  -5  -7  -1   44599    4419   1
   7   5   1   52006    4419  -2
   5   7  -1   52006    4419   1
   7  -5  -1   41993    4419  -2
  -5   7   1   41993    4419   1
   7  -5  -1   44981    4419  -2
  -5   7   1   44981    4419   1
  -5  -1   7   50353    4419  -2
  -1  -5  -7   50353    4419   1
   1   7   5   44695    4419  -2
   7   1  -5   44695    4419   1
   5   1   7   46125    4387  -2
   1   5  -7   46125    4387   1
  -5   1  -7   51116    4419  -2
   1  -5   7   51116    4419   1
   7   5   1   50162    4419  -2
   5   7  -1   50162    4419   1
  -1  -7   5   46983    4387  -2
  -7  -1  -5   46983    4387   1
   1   7  -5   45489    4419  -2
   7   1   5   45489    4419   1
  -5  -1  -7   45330    4419  -2
  -1  -5   7   45330    4419   1
  -5   1   7   47841    4387  -2
   1  -5  -7   47841    4387   1
   1  -7   5   55058    4387  -2
  -7   1  -5   55058    4387   1
  -1   7   5   53214    4419  -2
   7  -1  -5   53214    4419   1
   5  -1   7   52928    4387  -2
  -1   5  -7   52928    4387   1
   7   5  -1   47301    4419  -2
   5   7   1   47301    4419   1
   7   5  -1   43105    4387  -2
   5   7   1   43105    4387   1
   5  -1   7   48445    4419  -2
  -1   5  -7   48445    4419   1
  -5  -1  -7   45299    4419  -2
  -1  -5   7   45299    4419   1
   7  -5   1   51751    4419  -2
  -5   7  -1   51751    4419   1
   7  -5   1   47937    4419  -2
  -5   7  -1   47937    4419   1
   7  -5   1   49145    4419  -2
  -5   7  -1   49145    4419   1
   5   1  -7   50830    4419  -2
   1   5   7   50830    4419   1
  -1   7   5   49177    4419  -2
   7  -1  -5   49177    4419   1
  -5   2  -7    2479     254  -2
   2  -5   7    2479     254   1
   7   5   2    2130     254  -2
   5   7  -2    2130     254   1
  -2   7  -5    2416     254  -2
   7  -2   5    2416     254   1
   7   5   2    2257     254  -2
   5   7  -2    2257     254   1
   7   5   2    1812     254  -2
   5   7  -2    1812     254   1
   5   2   7    2511     223  -2
   2   5  -7    2511     223   1
   2   7   5    1812     254  -2
   7   2  -5    1812     254   1
   2  -7  -5    2384     254  -2
  -7   2   5    2384     254   1
   7   5   2    1907     254  -2
   5   7  -2    1907     254   1
   7  -5  -2    2861     254  -2
  -5   7   2    2861     254   1
   7  -5  -2    2702     254  -2
  -5   7   2    2702     254   1
   5   2   7    2511     286  -2
   2   5  -7    2511     286   1
  -5  -2   7    2225     254  -2
  -2  -5  -7    2225     254   1
   5   2   7    2925     254  -2
   2   5  -7    2925     254   1
  -5   2  -7    2257     254  -2
   2  -5   7    2257     254   1
  -2  -7   5    2225     254  -2
  -7  -2  -5    2225     254   1
  -2   7   5    2257     254  -2
   7  -2  -5    2257     254   1
  -5  -2  -7    2861     254  -2
  -2  -5   7    2861     254   1
   2  -7   5    2193     254  -2
  -7   2  -5    2193     254   1
   2  -7   5    2257     223  -2
  -7   2  -5    2257     223   1
   2  -7   5    2829     254  -2
  -7   2  -5    2829     254   1
   7  -5   2    2511     254  -2
  -5   7  -2    2511     254   1
   5  -2   7    2225     223  -2
  -2   5  -7    2225     223   1
   2  -7   5    2925     254  -2
  -7   2  -5    2925     254   1
   7  -5   2    2448     254  -2
  -5   7  -2    2448     254   1
   5  -2   7    2448     254  -2
  -2   5  -7    2448     254   1
   7  -5   2    2098     254  -2
  -5   7  -2    2098     254   1
   7  -5   2    2225     223  -2
  -5   7  -2    2225     223   1
  -5  -2  -7    2225     286  -2
  -2  -5   7    2225     286   1
   5   2  -7    2257     254  -2
   2   5   7    2257     254   1
   2   7  -5    2670     254  -2
   7   2   5    2670     254   1
  -7  -5   3   64880    5372  -2
  -5  -7  -3   64880    5372   1
   5   3   7   58491    5340  -2
   3   5  -7   58491    5340   1
  -3  -7   5   66819    5340  -2
  -7  -3  -5   66819    5340   1
  -5   3  -7   49654    5372  -2
   3  -5   7   49654    5372   1
   7  -5  -3   57632    5372  -2
  -5   7   3   57632    5372   1
  -3  -7   5   52419    5340  -2
  -7  -3  -5   52419    5340   1
   7   5   3   60843    5340  -2
   5   7  -3   60843    5340   1
   3  -7  -5   55121    5340  -2
  -7   3   5   55121    5340   1
   3  -7  -5   55884    5340  -2
  -7   3   5   55884    5340   1
  -3   7  -5   55979    5372  -2
   7  -3   5   55979    5372   1
   7  -5  -3   56488    5340  -2
  -5   7   3   56488    5340   1
   7   5   3   57473    5340  -2
   5   7  -3   57473    5340   1
   5   3   7   59889    5340  -2
   3   5  -7   59889    5340   1
   7   5   3   49717    5340  -2
   5   7  -3   49717    5340   1
  -5   3  -7   60938    5340  -2
   3  -5   7   60938    5340   1
   5   3   7   55884    5340  -2
   3   5  -7   55884    5340   1
  -5  -3   7   55471    5340  -2
  -3  -5  -7   55471    5340   1
   5  -3  -7   64340    5340  -2
  -3   5   7   64340    5340   1
   7   5   3   53754    5340  -2
   5   7  -3   53754    5340   1
   7   5   3   56965    5340  -2
   5   7  -3   56965    5340   1
  -5  -3   7   56075    5340  -2
  -3  -5  -7   56075    5340   1
   3   7   5   62782    5340  -2
   7   3  -5   62782    5340   1
   7  -5   3   53468    5372  -2
  -5   7  -3   53468    5372   1
   7  -5   3   55661    5340  -2
  -5   7  -3   55661    5340   1
   7   5  -3   54485    5340  -2
   5   7   3   54485    5340   1
   5   3  -7   58713    5340  -2
   3   5   7   58713    5340   1
   7  -5   3   58077    5340  -2
  -5   7  -3   58077    5340   1
   5   3  -7   61193    5340  -2
   3   5   7   61193    5340   1
   5  -3   7   58522    5340  -2
  -3   5  -7   58522    5340   1
  -3  -7  -5   64594    5340  -2
  -7  -3   5   64594    5340   1
   7  -5   3   57696    5340  -2
  -5   7  -3   57696    5340   1
   3   7  -5   62719    5340  -2
   7   3   5   62719    5340   1
   3  -7   5   57155    5340  -2
  -7   3  -5   57155    5340   1
   5  -3   7   61606    5340  -2
  -3   5  -7   61606    5340   1
   3  -7   5   55344    5340  -2
  -7   3  -5   55344    5340   1
   3  -7   5   57823    5340  -2
  -7   3  -5   57823    5340   1
  -5   3   7   56043    5340  -2
   3  -5  -7   56043    5340   1
   7   5  -3   65580    5340  -2
   5   7   3   65580    5340   1
  -3   7   5   52864    5340  -2
   7  -3  -5   52864    5340   1
  -5  -3  -7   60938    5372  -2
  -3  -5   7   60938    5372   1
   5  -3   7   60239    5340  -2
  -3   5  -7   60239    5340   1
   3  -7   5   56456    5340  -2
  -7   3  -5   56456    5340   1
   4   7   5   56710    6040  -2
   7   4  -5   56710    6040   1
   4  -7  -5   63259    6040  -2
  -7   4   5   63259    6040   1
   4   7   5   55439    6040  -2
   7   4  -5   55439    6040   1
  -5  -4   7   63736    6072  -2
  -4  -5  -7   63736    6072   1
   7  -5  -4   70030    6072  -2
  -5   7   4   70030    6072   1
   5  -4  -7   59794    6072  -2
  -4   5   7   59794    6072   1
   5  -4  -7   64848    6040  -2
  -4   5   7   64848    6040   1
  -4   7  -5   73240    6072  -2
   7  -4   5   73240    6072   1
  -5  -4   7   65262    6072  -2
  -4  -5  -7   65262    6072   1
   7   5   4   61638    6040  -2
   5   7  -4   61638    6040   1
  -4  -7   5   64340    6040  -2
  -7  -4  -5   64340    6040   1
  -4  -7   5   71683    6040  -2
  -7  -4  -5   71683    6040   1
   7  -5  -4   68599    6072  -2
  -5   7   4   68599    6072   1
   5   4   7   70570    6040  -2
   4   5  -7   70570    6040   1
   5   4   7   68758    6040  -2
   4   5  -7   68758    6040   1
   4   7   5   59858    6040  -2
   7   4  -5   59858    6040   1
   7   5   4   63831    6040  -2
   5   7  -4   63831    6040   1
   4  -7  -5   66056    6072  -2
  -7   4   5   66056    6072   1
  -7  -5   4   59826    6072  -2
  -5  -7  -4   59826    6072   1
   7   5   4   58109    6040  -2
   5   7  -4   58109    6040   1
   7   5   4   63672    6072  -2
   5   7  -4   63672    6072   1
   5   4   7   69458    6040  -2
   4   5  -7   69458    6040   1
   7   5   4   60875    6072  -2
   5   7  -4   60875    6072   1
   7   5  -4   58268    6040  -2
   5   7   4   58268    6040   1
   7  -5   4   69839    6072  -2
  -5   7  -4   69839    6072   1
   7  -5   4   72954    6072  -2
  -5   7  -4   72954    6072   1
   7  -5   4   71111    6072  -2
  -5   7  -4   71111    6072   1
   7  -5   4   67678    6072  -2
  -5   7  -4   67678    6072   1
  -4  -7  -5   61288    6040  -2
  -7  -4   5   61288    6040   1
   4  -7   5   73813    6072  -2
  -7   4  -5   73813    6072   1
   5  -4   7   72096    6072  -2
  -4   5  -7   72096    6072   1
   7   5  -4   59730    6072  -2
   5   7   4   59730    6072   1
   4  -7   5   70284    6040  -2
  -7   4  -5   70284    6040   1
   5   4  -7   59222    6040  -2
   4   5   7   59222    6040   1
   5   4  -7   65929    6040  -2
   4   5   7   65929    6040   1
   5  -4   7   69013    6040  -2
  -4   5  -7   69013    6040   1
   5  -4   7   68536    6072  -2
  -4   5  -7   68536    6072   1
   4  -7   5   71460    6072  -2
  -7   4  -5   71460    6072   1
   7  -5   4   68345    6072  -2
  -5   7  -4   68345    6072   1
   4  -7   5   67233    6072  -2
  -7   4  -5   67233    6072   1
  -5  -4  -7   69362    6072  -2
  -4  -5   7   69362    6072   1
   7  -5  -5  301735   29531  -2
  -5   7   5  301735   29531   1
   5   7   5  326276   29500  -2
   7   5  -5  326276   29500   1
   7   5   5  308475   29500  -2
   5   7  -5  308475   29500   1
   5   5   7  317248   29500  -2
   5   5  -7  317248   29500   1
  -5  -7   5  339850   29500  -2
  -7  -5  -5  339850   29500   1
   5   5   7  316867   29500  -2
   5   5  -7  316867   29500   1
   5  -7  -5  348051   29500  -2
  -7   5   5  348051   29500   1
   5   5   7  329836   29500  -2
   5   5  -7  329836   29500   1
   7   5   5  321921   29500  -2
   5   7  -5  321921   29500   1
   5  -7  -5  325227   29500  -2
  -7   5   5  325227   29500   1
  -5  -5   7  357016   29500  -2
  -5  -5  -7  357016   29500   1
   7   5   5  330631   29500  -2
   5   7  -5  330631   29500   1
  -7  -5   5  333460   29500  -2
  -5  -7  -5  333460   29500   1
   5   7   5  317057   29500  -2
   7   5  -5  317057   29500   1
  -5  -7   5  312925   29500  -2
  -7  -5  -5  312925   29500   1
  -5  -5   7  302403   29500  -2
  -5  -5  -7  302403   29500   1
   5  -5  -7  322525   29500  -2
  -5   5   7  322525   29500   1
   5  -5  -7  332348   29500  -2
  -5   5   7  332348   29500   1
   7   5   5  321063   29500  -2
   5   7  -5  321063   29500   1
   5   7   5  351866   29500  -2
   7   5  -5  351866   29500   1
   5   7   5  309015   29500  -2
   7   5  -5  309015   29500   1
   7   5   5  321730   29500  -2
   5   7  -5  321730   29500   1
   7  -5  -5  332602   29500  -2
  -5   7   5  332602   29500   1
   5  -5   7  319410   29500  -2
  -5   5  -7  319410   29500   1
   7  -5   5  276209   29531  -2
  -5   7  -5  276209   29531   1
   7   5  -5  339754   29500  -2
   5   7   5  339754   29500   1
   5  -5   7  306981   29500  -2
  -5   5  -7  306981   29500   1
   5  -7   5  312003   29500  -2
  -7   5  -5  312003   29500   1
  -5  -5  -7  318806   29500  -2
  -5  -5   7  318806   29500   1
   5   5  -7  331013   29500  -2
   5   5   7  331013   29500   1
   5  -7   5  309333   29531  -2
  -7   5  -5  309333   29531   1
   7  -5   5  323352   29500  -2
  -5   7  -5  323352   29500   1
   7  -5   5  306091   29531  -2
  -5   7  -5  306091   29531   1
   7  -5   5  331553   29500  -2
  -5   7  -5  331553   29500   1
   5   7  -5  330123   29500  -2
   7   5   5  330123   29500   1
   5  -7   5  307998   29500  -2
  -7   5  -5  307998   29500   1
  -7  -5  -5  324273   29500  -2
  -5  -7   5  324273   29500   1
   5  -7   5  326817   29500  -2
  -7   5  -5  326817   29500   1
   5  -7   5  316040   29500  -2
  -7   5  -5  316040   29500   1
   5  -5   7  320999   29500  -2
  -5   5  -7  320999   29500   1
   5  -5   7  316740   29500  -2
  -5   5  -7  316740   29500   1
   5  -7   5  287590   29500  -2
  -7   5  -5  287590   29500   1
   6   7   5   35508    3433  -2
   7   6  -5   35508    3433   1
   6   7   5   40212    3433  -2
   7   6  -5   40212    3433   1
   6  -7  -5   36970    3433  -2
  -7   6   5   36970    3433   1
   6   7   5   39608    3433  -2
   7   6  -5   39608    3433   1
   5  -6  -7   41770    3433  -2
  -6   5   7   41770    3433   1
   6  -7  -5   35317    3433  -2
  -7   6   5   35317    3433   1
  -7  -5   6   38051    3433  -2
  -5  -7  -6   38051    3433   1
   5   6   7   33314    3433  -2
   6   5  -7   33314    3433   1
   5  -6  -7   39195    3433  -2
  -6   5   7   39195    3433   1
   6   7   5   39354    3433  -2
   7   6  -5   39354    3433   1
   7  -5  -6   33664    3433  -2
  -5   7   6   33664    3433   1
   7   5   6   36175    3433  -2
   5   7  -6   36175    3433   1
   7   5   6   36620    3433  -2
   5   7  -6   36620    3433   1
  -6  -7   5   36080    3433  -2
  -7  -6  -5   36080    3433   1
   5   6   7   33855    3433  -2
   6   5  -7   33855    3433   1
   5   6   7   35190    3433  -2
   6   5  -7   35190    3433   1
   7   5   6   37097    3433  -2
   5   7  -6   37097    3433   1
   6   7   5   36525    3433  -2
   7   6  -5   36525    3433   1
  -6  -7   5   35190    3433  -2
  -7  -6  -5   35190    3433   1
  -5  -6   7   35381    3433  -2
  -6  -5  -7   35381    3433   1
   5   6   7   31820    3433  -2
   6   5  -7   31820    3433   1
   6   7   5   36620    3433  -2
   7   6  -5   36620    3433   1
   5  -6   7   40339    3433  -2
  -6   5  -7   40339    3433   1
   6  -7   5   38305    3433  -2
  -7   6  -5   38305    3433   1
   6  -7   5   36493    3465  -2
  -7   6  -5   36493    3465   1
   5   6  -7   33950    3433  -2
   6   5   7   33950    3433   1
   5  -6   7   41261    3433  -2
  -6   5  -7   41261    3433   1
   5  -6   7   40594    3433  -2
  -6   5  -7   40594    3433   1
   7  -5   6   38941    3433  -2
  -5   7  -6   38941    3433   1
  -5  -6  -7   33410    3433  -2
  -6  -5   7   33410    3433   1
   6  -7   5   37288    3433  -2
  -7   6  -5   37288    3433   1
   6   7  -5   34490    3433  -2
   7   6   5   34490    3433   1
   6  -7   5   37288    3433  -2
  -7   6  -5   37288    3433   1
   7  -5   6   35317    3433  -2
  -5   7  -6   35317    3433   1
   7   5  -6   39195    3433  -2
   5   7   6   39195    3433   1
   5  -6   7   39004    3465  -2
  -6   5  -7   39004    3465   1
   6  -7   5   38464    3433  -2
  -7   6  -5   38464    3433   1
   5  -6   7   41770    3433  -2
  -6   5  -7   41770    3433   1
   7  -5   6   35285    3465  -2
  -5   7  -6   35285    3465   1
   7  -5   6   40626    3433  -2
  -5   7  -6   40626    3433   1
   7  -5   6   37828    3465  -2
  -5   7  -6   37828    3465   1
  -7  -5  -6   36874    3433  -2
  -5  -7   6   36874    3433   1
   7  -5   6   39036    3433  -2
  -5   7  -6   39036    3433   1
   6  -7   5   38241    3433  -2
  -7   6  -5   38241    3433   1
  -5   6   7   39004    3433  -2
   6  -5  -7   39004    3433   1
   5  -6   7   36143    3433  -2
  -6   5  -7   36143    3433   1
   5  -6   7   37987    3433  -2
  -6   5  -7   37987    3433   1
   7   0  -6     286      64   1
   7   0  -6     318      64   1
  -7   0  -6     413      64   1
  -6   7   0     254      64   1
   0   6  -7     350      95   1
   0   6  -7     350      64   1
   0   6   7     318      95   1
   6   7   0     159      64   1
   7   0   6     318      95   1
   0   6  -7     286      64   1
   0  -6  -7     223      64   1
   0  -6   7     445     127   1
  -7   0  -6     223      95   1
  -7   0  -6     223      64   1
  -6   7   0     223      95   1
  -6   7   0     254      95   1
  -6   7   0     254      95   1
   6   7   0     254      64   1
   0  -6   7     318      95   1
   7   6   1   11348    1081  -2
   6   7  -1   11348    1081   1
   7   6   1   11285    1081  -2
   6   7  -1   11285    1081   1
   1   7   6   11984    1081  -2
   7   1  -6   11984    1081   1
  -6  -1   7   12111    1081  -2
  -1  -6  -7   12111    1081   1
  -1   7  -6   10172    1113  -2
   7  -1   6   10172    1113   1
   6   1   7   12461    1081  -2
   1   6  -7   12461    1081   1
   7   6   1   10363    1081  -2
   6   7  -1   10363    1081   1
  -6   1  -7   10554    1113  -2
   1  -6   7   10554    1113   1
   1   7   6   12238    1081  -2
   7   1  -6   12238    1081   1
   6  -1  -7   12207    1113  -2
  -1   6   7   12207    1113   1
   7   6   1   11412    1113  -2
   6   7  -1   11412    1113   1
   1   7   6   11412    1081  -2
   7   1  -6   11412    1081   1
   1  -7   6   10331    1081  -2
  -7   1  -6   10331    1081   1
   6   1  -7   12906    1113  -2
   1   6   7   12906    1113   1
   7  -6   1   11062    1113  -2
  -6   7  -1   11062    1113   1
  -6   1   7   11666    1081  -2
   1  -6  -7   11666    1081   1
   7   6  -1   12270    1081  -2
   6   7   1   12270    1081   1
   7  -6   1   12111    1081  -2
  -6   7  -1   12111    1081   1
   1  -7   6   10744    1113  -2
  -7   1  -6   10744    1113   1
   7  -6   1   11158    1081  -2
  -6   7  -1   11158    1081   1
   7  -6   1   11476    1081  -2
  -6   7  -1   11476    1081   1
   6  -1   7   11412    1081  -2
  -1   6  -7   11412    1081   1
   7   6  -1   13224    1081  -2
   6   7   1   13224    1081   1
   7   6  -1   14051    1081  -2
   6   7   1   14051    1081   1
  -1   7   6   12429    1081  -2
   7  -1  -6   12429    1081   1
   7  -6   1   10586    1113  -2
  -6   7  -1   10586    1113   1
   6  -1   7   11094    1113  -2
  -1   6  -7   11094    1113   1
  -1   7   6   13923    1081  -2
   7  -1  -6   13923    1081   1
   7   6   2    6930     668  -2
   6   7  -2    6930     668   1
   7   6   2    7407     668  -2
   6   7  -2    7407     668   1
   7  -6  -2    8360     699  -2
  -6   7   2    8360     699   1
   2  -7  -6    7121     668  -2
  -7   2   6    7121     668   1
  -6  -2   7    8488     668  -2
  -2  -6  -7    8488     668   1
  -6  -2   7    7947     668  -2
  -2  -6  -7    7947     668   1
   6   2   7    7852     668  -2
   2   6  -7    7852     668   1
   7   6   2    8106     668  -2
   6   7  -2    8106     668   1
   2   7   6    6485     668  -2
   7   2  -6    6485     668   1
   7   6   2    7756     668  -2
   6   7  -2    7756     668   1
  -6   2  -7    6199     668  -2
   2  -6   7    6199     668   1
  -2   7  -6    6962     668  -2
   7  -2   6    6962     668   1
   2   7   6    5976     668  -2
   7   2  -6    5976     668   1
   2   7   6    5785     668  -2
   7   2  -6    5785     668   1
   7   6   2    7438     668  -2
   6   7  -2    7438     668   1
  -2  -7   6    7184     668  -2
  -7  -2  -6    7184     668   1
  -2  -7   6    8201     668  -2
  -7  -2  -6    8201     668   1
   2  -7   6    6390     668  -2
  -7   2  -6    6390     668   1
   2  -7   6    6421     668  -2
  -7   2  -6    6421     668   1
   2  -7   6    7089     668  -2
  -7   2  -6    7089     668   1
   6  -2   7    6739     668  -2
  -2   6  -7    6739     668   1
  -2   7   6    8329     668  -2
   7  -2  -6    8329     668   1
   7  -6   2    7566     668  -2
  -6   7  -2    7566     668   1
   6  -2   7    6517     668  -2
  -2   6  -7    6517     668   1
   7  -6   2    6993     668  -2
  -6   7  -2    6993     668   1
   7  -6   2    7216     699  -2
  -6   7  -2    7216     699   1
   6  -2   7    6358     668  -2
  -2   6  -7    6358     668   1
  -6   2   7    5881     668  -2
   2  -6  -7    5881     668   1
   2  -7   6    6676     668  -2
  -7   2  -6    6676     668   1
   7   6  -2    5944     668  -2
   6   7   2    5944     668   1
   7  -6   2    7025     668  -2
  -6   7  -2    7025     668   1
   7   6   3   68377    6358  -2
   6   7  -3   68377    6358   1
  -6  -3   7   69617    6390  -2
  -3  -6  -7   69617    6390   1
  -6  -3   7   69458    6358  -2
  -3  -6  -7   69458    6358   1
   7  -6  -3   75529    6390  -2
  -6   7   3   75529    6390   1
  -3  -7   6   71301    6358  -2
  -7  -3  -6   71301    6358   1
   3  -7  -6   69426    6358  -2
  -7   3   6   69426    6358   1
   3  -7  -6   62560    6390  -2
  -7   3   6   62560    6390   1
  -7  -6   3   63609    6390  -2
  -6  -7  -3   63609    6390   1
   7   6   3   64149    6358  -2
   6   7  -3   64149    6358   1
   7   6   3   65293    6358  -2
   6   7  -3   65293    6358   1
   7   6   3   64340    6358  -2
   6   7  -3   64340    6358   1
   7   6   3   64658    6390  -2
   6   7  -3   64658    6390   1
   7  -6  -3   79026    6390  -2
  -6   7   3   79026    6390   1
   6   3   7   73558    6358  -2
   3   6  -7   73558    6358   1
  -3   7  -6   69108    6390  -2
   7  -3   6   69108    6390   1
   3   7   6   68726    6358  -2
   7   3  -6   68726    6358   1
   3   7   6   67900    6358  -2
   7   3  -6   67900    6358   1
   3   7   6   67805    6358  -2
   7   3  -6   67805    6358   1
   6   3   7   73495    6358  -2
   3   6  -7   73495    6358   1
   6   3   7   75116    6358  -2
   3   6  -7   75116    6358   1
  -6   3  -7   69108    6390  -2
   3  -6   7   69108    6390   1
   6  -3  -7   60271    6358  -2
  -3   6   7   60271    6358   1
   6  -3  -7   64689    6390  -2
  -3   6   7   64689    6390   1
  -6   3   7   63036    6358  -2
   3  -6  -7   63036    6358   1
  -6  -3  -7   74894    6390  -2
  -3  -6   7   74894    6390   1
   6  -3   7   70093    6358  -2
  -3   6  -7   70093    6358   1
   6  -3   7   73336    6390  -2
  -3   6  -7   73336    6390   1
  -3   7   6   71111    6358  -2
   7  -3  -6   71111    6358   1
   3   7  -6   73209    6390  -2
   7   3   6   73209    6390   1
   3  -7   6   70570    6390  -2
  -7   3  -6   70570    6390   1
   6   3  -7   71588    6358  -2
   3   6   7   71588    6358   1
   3  -7   6   73304    6358  -2
  -7   3  -6   73304    6358   1
   3  -7   6   70793    6358  -2
  -7   3  -6   70793    6358   1
   7  -6   3   74417    6390  -2
  -6   7  -3   74417    6390   1
   7  -6   3   68854    6358  -2
  -6   7  -3   68854    6358   1
   7  -6   3   70380    6390  -2
  -6   7  -3   70380    6390   1
   7  -6   3   72160    6358  -2
  -6   7  -3   72160    6358   1
   7   6  -3   63577    6358  -2
   6   7   3   63577    6358   1
   3  -7   6   70761    6358  -2
  -7   3  -6   70761    6358   1
  -3  -7  -6   65802    6390  -2
  -7  -3   6   65802    6390   1
   3  -7   6   68377    6358  -2
  -7   3  -6   68377    6358   1
   6   3  -7   69394    6358  -2
   3   6   7   69394    6358   1
   6  -3   7   64085    6390  -2
  -3   6  -7   64085    6390   1
   7   6  -3   67360    6358  -2
   6   7   3   67360    6358   1
   7   6   4   12715    1081  -2
   6   7  -4   12715    1081   1
   7   6   4   11889    1049  -2
   6   7  -4   11889    1049   1
   7   6   4   12588    1081  -2
   6   7  -4   12588    1081   1
  -6  -4   7   12366    1081  -2
  -4  -6  -7   12366    1081   1
  -4  -7   6   13129    1049  -2
  -7  -4  -6   13129    1049   1
   6   4   7   13097    1049  -2
   4   6  -7   13097    1049   1
   4   7   6   11571    1049  -2
   7   4  -6   11571    1049   1
   4   7   6   11603    1049  -2
   7   4  -6   11603    1049   1
   4   7   6   10331    1049  -2
   7   4  -6   10331    1049   1
   4   7   6   11031    1049  -2
   7   4  -6   11031    1049   1
   7   6   4   10808    1049  -2
   6   7  -4   10808    1049   1
   6   4   7   13224    1049  -2
   4   6  -7   13224    1049   1
   7   6   4   12684    1049  -2
   6   7  -4   12684    1049   1
  -7  -6   4   11253    1081  -2
  -6  -7  -4   11253    1081   1
   7  -6  -4   12715    1081  -2
  -6   7   4   12715    1081   1
   7  -6  -4   12111    1081  -2
  -6   7   4   12111    1081   1
   6   4   7   12016    1049  -2
   4   6  -7   12016    1049   1
   6  -4  -7    9823    1049  -2
  -4   6   7    9823    1049   1
   4  -7  -6   12620    1049  -2
  -7   4   6   12620    1049   1
   4  -7  -6   10935    1049  -2
  -7   4   6   10935    1049   1
   4  -7   6    9791    1049  -2
  -7   4  -6    9791    1049   1
   6   4  -7   12874    1049  -2
   4   6   7   12874    1049   1
  -4   7   6   11952    1049  -2
   7  -4  -6   11952    1049   1
  -4   7   6   10554    1049  -2
   7  -4  -6   10554    1049   1
   6  -4   7   10713    1049  -2
  -4   6  -7   10713    1049   1
   4  -7   6    9886    1081  -2
  -7   4  -6    9886    1081   1
   6   4  -7   12779    1049  -2
   4   6   7   12779    1049   1
   4  -7   6    9759    1049  -2
  -7   4  -6    9759    1049   1
   4  -7   6   10204    1049  -2
  -7   4  -6   10204    1049   1
   7   6  -4   12429    1049  -2
   6   7   4   12429    1049   1
   6  -4   7   10490    1081  -2
  -4   6  -7   10490    1081   1
   6  -4   7   10268    1081  -2
  -4   6  -7   10268    1081   1
  -4  -7  -6   12111    1049  -2
  -7  -4   6   12111    1049   1
   4  -7   6   10077    1049  -2
  -7   4  -6   10077    1049   1
   7  -6   4   10427    1049  -2
  -6   7  -4   10427    1049   1
   7  -6   4    9918    1081  -2
  -6   7  -4    9918    1081   1
   7  -6   4   10299    1049  -2
  -6   7  -4   10299    1049   1
   7  -6   4   10776    1049  -2
  -6   7  -4   10776    1049   1
  -6   4   7   11571    1049  -2
   4  -6  -7   11571    1049   1
   4  -7   6   10554    1049  -2
  -7   4  -6   10554    1049   1
   7   6  -4   10109    1049  -2
   6   7   4   10109    1049   1
   7  -6   4    9886    1081  -2
  -6   7  -4    9886    1081   1
   7  -6  -5    2511     254  -2
  -6   7   5    2511     254   1
  -6  -5   7    1717     223  -2
  -5  -6  -7    1717     223   1
   5   7   6    2162     223  -2
   7   5  -6    2162     223   1
   5   7   6    1971     223  -2
   7   5  -6    1971     223   1
   5   7   6    1844     223  -2
   7   5  -6    1844     223   1
   5   7   6    2003     223  -2
   7   5  -6    2003     223   1
   7   6   5    2289     223  -2
   6   7  -5    2289     223   1
   7   6   5    1907     223  -2
   6   7  -5    1907     223   1
   7   6   5    1685     223  -2
   6   7  -5    1685     223   1
   5  -7  -6    1812     223  -2
  -7   5   6    1812     223   1
   6   5   7    2670     223  -2
   5   6  -7    2670     223   1
   7   6   5    1685     223  -2
   6   7  -5    1685     223   1
   7   6   5    1685     223  -2
   6   7  -5    1685     223   1
   7   6   5    1589     223  -2
   6   7  -5    1589     223   1
   6   5   7    2511     223  -2
   5   6  -7    2511     223   1
   6   5   7    2638     223  -2
   5   6  -7    2638     223   1
  -7  -6   5    1717     223  -2
  -6  -7  -5    1717     223   1
  -5  -7   6    2638     223  -2
  -7  -5  -6    2638     223   1
  -7  -6   5    1526     223  -2
  -6  -7  -5    1526     223   1
  -6  -5   7    2607     254  -2
  -5  -6  -7    2607     254   1
   6  -5  -7    1621     223  -2
  -5   6   7    1621     223   1
  -6  -5   7    1971     223  -2
  -5  -6  -7    1971     223   1
   5  -7  -6    2003     223  -2
  -7   5   6    2003     223   1
   6   5  -7    2098     223  -2
   5   6   7    2098     223   1
  -5   7   6    1876     254  -2
   7  -5  -6    1876     254   1
  -5  -7  -6    1971     223  -2
  -7  -5   6    1971     223   1
   5  -7   6    2003     223  -2
  -7   5  -6    2003     223   1
   5  -7   6    2289     223  -2
  -7   5  -6    2289     223   1
   5  -7   6    1876     223  -2
  -7   5  -6    1876     223   1
   5  -7   6    2289     223  -2
  -7   5  -6    2289     223   1
   5  -7   6    2003     223  -2
  -7   5  -6    2003     223   1
   5  -7   6    2162     223  -2
  -7   5  -6    2162     223   1
   7   6  -5    1653     223  -2
   6   7   5    1653     223   1
  -6   5   7    1939     254  -2
   5  -6  -7    1939     254   1
   5   7  -6    2670     223  -2
   7   5   6    2670     223   1
   7  -6   5    2130     254  -2
  -6   7  -5    2130     254   1
   7  -6   5    2575     254  -2
  -6   7  -5    2575     254   1
   7  -6   5    2384     223  -2
  -6   7  -5    2384     223   1
   7  -6   5    2448     223  -2
  -6   7  -5    2448     223   1
   7  -6   5    2575     223  -2
  -6   7  -5    2575     223   1
   6  -5   7    2448     223  -2
  -5   6  -7    2448     223   1
   6  -5   7    2638     254  -2
  -5   6  -7    2638     254   1
   6  -5   7    2130     223  -2
  -5   6  -7    2130     223   1
  -5   7   6    2003     223  -2
   7  -5  -6    2003     223   1
  -6  -5  -7    2670     254  -2
  -5  -6   7    2670     254   1
   6  -5   7    2479     223  -2
  -5   6  -7    2479     223   1
   6  -5   7    1876     223  -2
  -5   6  -7    1876     223   1
  -6  -7   6     286      95  -2
  -7  -6  -6     286      95   1
  -6  -7   6     223      95  -2
  -7  -6  -6     223      95   1
   6   7   6     286      64  -2
   7   6  -6     286      64   1
   6   7   6     445      95  -2
   7   6  -6     445      95   1
   6   7   6     127     127  -2
   7   6  -6     127     127   1
   6   7   6     413      64  -2
   7   6  -6     413      64   1
   6   7   6     350      64  -2
   7   6  -6     350      64   1
   7   6   6     382      64  -2
   6   7  -6     382      64   1
   7   6   6     382      95  -2
   6   7  -6     382      95   1
   7   6   6     382      95  -2
   6   7  -6     382      95   1
   6  -7  -6     382      95  -2
  -7   6   6     382      95   1
  -7  -6   6     223      95  -2
  -6  -7  -6     223      95   1
  -7  -6   6     254      95  -2
  -6  -7  -6     254      95   1
  -7  -6   6     159     127  -2
  -6  -7  -6     159     127   1
   6  -6  -7     254      95  -2
  -6   6   7     254      95   1
  -6  -6   7     382      95  -2
  -6  -6  -7     382      95   1
  -6  -6   7     318      95  -2
  -6  -6  -7     318      95   1
   7  -6  -6     286      95  -2
  -6   7   6     286      95   1
   6   6   7     286      64  -2
   6   6  -7     286      64   1
   7   6   6     286      64  -2
   6   7  -6     286      64   1
   7   6   6     318      95  -2
   6   7  -6     318      95   1
   6   6   7     254      64  -2
   6   6  -7     254      64   1
   7   6   6     413      95  -2
   6   7  -6     413      95   1
   7  -6  -6     413      95  -2
  -6   7   6     413      95   1
   6   6   7     604      95  -2
   6   6  -7     604      95   1
   6  -6   7     413      95  -2
  -6   6  -7     413      95   1
   7  -6   6     477     127  -2
  -6   7  -6     477     127   1
   7  -6   6     350      95  -2
  -6   7  -6     350      95   1
   7  -6   6     477     127  -2
  -6   7  -6     477     127   1
   6  -6   7     318      95  -2
  -6   6  -7     318      95   1
   7  -6   6     413      95  -2
  -6   7  -6     413      95   1
   7  -6   6     477      64  -2
  -6   7  -6     477      64   1
  -6  -6  -7     572     127  -2
  -6  -6   7     572     127   1
  -7  -6  -6     382      95  -2
  -6  -7   6     382      95   1
  -7   6   6     731     127  -2
   6  -7  -6     731     127   1
  -6   6   7     350      95  -2
   6  -6  -7     350      95   1
  -6   6   7     286      95  -2
   6  -6  -7     286      95   1
   6  -6   7     540     127  -2
  -6   6  -7     540     127   1
   6  -6   7     254      64  -2
  -6   6  -7     254      64   1
   7  -6   6     509      95  -2
  -6   7  -6     509      95   1
   6   6  -7     668      95  -2
   6   6   7     668      95   1
   6  -6   7     254      95  -2
  -6   6  -7     254      95   1
   6  -7   6     318      95  -2
  -7   6  -6     318      95   1
   6  -7   6     382      95  -2
  -7   6  -6     382      95   1
   6  -7   6     318      64  -2
  -7   6  -6     318      64   1
   6  -6   7     318      95  -2
  -6   6  -7     318      95   1
   6  -6   7     509      95  -2
  -6   6  -7     509      95   1
   7   6  -6     318      95  -2
   6   7   6     318      95   1
  -6   7   6     699     127  -2
   7  -6  -6     699     127   1
  -6  -7  -6     286      95  -2
  -7  -6   6     286      95   1
   6  -7   6     350      95  -2
  -7   6  -6     350      95   1
   6  -7   6     413     191  -2
  -7   6  -6     413     191   1
   6  -7   6     477      95  -2
  -7   6  -6     477      95   1
   6  -7   6     413      95  -2
  -7   6  -6     413      95   1
   6   7  -6     413      95  -2
   7   6   6     413      95   1
  -1  -7   7  320395   33155  -2
  -7  -1  -7  320395   33155   1
  -1  -7   7  331776   33155  -2
  -7  -1  -7  331776   33155   1
   7   7   1  391252   33155  -2
   7   7  -1  391252   33155   1
  -1   7  -7  380984   33187  -2
   7  -1   7  380984   33187   1
   1   7   7  378759   33155  -2
   7   1  -7  378759   33155   1
   1   7   7  309969   33155  -2
   7   1  -7  309969   33155   1
   1   7   7  323320   33155  -2
   7   1  -7  323320   33155   1
   7  -7  -1  366012   33155  -2
  -7   7   1  366012   33155   1
   7  -7  -1  355108   33187  -2
  -7   7   1  355108   33187   1
  -7  -1   7  398722   33155  -2
  -1  -7  -7  398722   33155   1
  -7  -1   7  310191   33155  -2
  -1  -7  -7  310191   33155   1
   7   1   7  374404   33155  -2
   1   7  -7  374404   33155   1
   7   1   7  353678   33155  -2
   1   7  -7  353678   33155   1
   1   7   7  368650   33155  -2
   7   1  -7  368650   33155   1
   7  -1  -7  370430   33155  -2
  -1   7   7  370430   33155   1
   7   7   1  390107   33155  -2
   7   7  -1  390107   33155   1
   7   1   7  350817   33187  -2
   1   7  -7  350817   33187   1
   7   7   1  382541   33155  -2
   7   7  -1  382541   33155   1
   7   1   7  355013   33155  -2
   1   7  -7  355013   33155   1
   7  -1   7  387818   33187  -2
  -1   7  -7  387818   33187   1
  -7   1   7  345317   33155  -2
   1  -7  -7  345317   33155   1
   7  -1   7  409339   33155  -2
  -1   7  -7  409339   33155   1
  -7   1   7  310732   33155  -2
   1  -7  -7  310732   33155   1
  -1   7   7  323701   33155  -2
   7  -1  -7  323701   33155   1
  -1   7   7  322207   33155  -2
   7  -1  -7  322207   33155   1
  -1   7   7  367219   33155  -2
   7  -1  -7  367219   33155   1
  -1   7   7  380920   33155  -2
   7  -1  -7  380920   33155   1
   1  -7   7  361879   33155  -2
  -7   1  -7  361879   33155   1
   1  -7   7  356539   33155  -2
  -7   1  -7  356539   33155   1
   7  -7   1  375039   33187  -2
  -7   7  -1  375039   33187   1
   7  -7   1  391856   33155  -2
  -7   7  -1  391856   33155   1
   7  -1   7  400883   33155  -2
  -1   7  -7  400883   33155   1
   1   7  -7  354917   33155  -2
   7   1   7  354917   33155   1
  -1   7   7  359114   33155  -2
   7  -1  -7  359114   33155   1
   1  -7   7  394780   33155  -2
  -7   1  -7  394780   33155   1
   7   7  -1  378536   33155  -2
   7   7   1  378536   33155   1
   7   7  -1  319187   33155  -2
   7   7   1  319187   33155   1
   7   7  -1  360671   33155  -2
   7   7   1  360671   33155   1
  -2  -7   7   12779    1113  -2
  -7  -2  -7   12779    1113   1
  -2  -7   7   12684    1081  -2
  -7  -2  -7   12684    1081   1
   7   7   2   10713    1081  -2
   7   7  -2   10713    1081   1
   7   7   2   10522    1081  -2
   7   7  -2   10522    1081   1
  -2   7  -7   10013    1113  -2
   7  -2   7   10013    1113   1
   2   7   7   13097    1081  -2
   7   2  -7   13097    1081   1
   2   7   7   13002    1081  -2
   7   2  -7   13002    1081   1
   7   7   2   10586    1081  -2
   7   7  -2   10586    1081   1
   7   7   2   10776    1081  -2
   7   7  -2   10776    1081   1
   7  -7  -2   12556    1113  -2
  -7   7   2   12556    1113   1
   7  -7  -2   12525    1081  -2
  -7   7   2   12525    1081   1
   7  -7  -2   11889    1113  -2
  -7   7   2   11889    1113   1
   7  -7  -2   13002    1081  -2
  -7   7   2   13002    1081   1
  -7  -2   7   10649    1081  -2
  -2  -7  -7   10649    1081   1
  -7  -2   7   10013    1081  -2
  -2  -7  -7   10013    1081   1
   7   2   7   12143    1081  -2
   2   7  -7   12143    1081   1
   7   7   2   10299    1081  -2
   7   7  -2   10299    1081   1
   7   7   2   10522    1081  -2
   7   7  -2   10522    1081   1
   2   7   7   13160    1081  -2
   7   2  -7   13160    1081   1
   7   2   7   12493    1081  -2
   2   7  -7   12493    1081   1
   7  -2  -7   12398    1081  -2
  -2   7   7   12398    1081   1
   7  -2  -7   12970    1113  -2
  -2   7   7   12970    1113   1
   7   2   7   12525    1081  -2
   2   7  -7   12525    1081   1
  -7   2   7   12938    1081  -2
   2  -7  -7   12938    1081   1
  -7   2   7   10903    1081  -2
   2  -7  -7   10903    1081   1
  -7  -2  -7   11189    1113  -2
  -2  -7   7   11189    1113   1
   7  -7   2   11730    1081  -2
  -7   7  -2   11730    1081   1
   7   2  -7   10077    1081  -2
   2   7   7   10077    1081   1
   7   2  -7   10872    1081  -2
   2   7   7   10872    1081   1
  -2   7   7   10681    1081  -2
   7  -2  -7   10681    1081   1
  -2   7   7    9695    1081  -2
   7  -2  -7    9695    1081   1
  -2   7   7   10109    1081  -2
   7  -2  -7   10109    1081   1
   2  -7   7    9664    1081  -2
  -7   2  -7    9664    1081   1
   2  -7   7   10395    1081  -2
  -7   2  -7   10395    1081   1
   7  -2   7   12207    1081  -2
  -2   7  -7   12207    1081   1
   7  -7   2   11189    1113  -2
  -7   7  -2   11189    1113   1
   2   7  -7   13065    1113  -2
   7   2   7   13065    1113   1
   7  -7   2   11126    1081  -2
  -7   7  -2   11126    1081   1
   7  -7   2   11793    1081  -2
  -7   7  -2   11793    1081   1
   7  -2   7   11348    1113  -2
  -2   7  -7   11348    1113   1
   7  -2   7   12556    1113  -2
  -2   7  -7   12556    1113   1
   2  -7   7   10077    1081  -2
  -7   2  -7   10077    1081   1
   7   7  -2   11857    1081  -2
   7   7   2   11857    1081   1
   7   7  -2   13129    1081  -2
   7   7   2   13129    1081   1
   7   7  -2   11539    1081  -2
   7   7   2   11539    1081   1
   7   7  -2   13097    1081  -2
   7   7   2   13097    1081   1
  -7  -7   3   40912    3592  -2
  -7  -7  -3   40912    3592   1
  -3  -7   7   36620    3529  -2
  -7  -3  -7   36620    3529   1
  -3  -7   7   32679    3529  -2
  -7  -3  -7   32679    3529   1
  -3  -7   7   33855    3529  -2
  -7  -3  -7   33855    3529   1
  -3  -7   7   36048    3529  -2
  -7  -3  -7   36048    3529   1
   7   7   3   35603    3529  -2
   7   7  -3   35603    3529   1
   3   7   7   37415    3529  -2
   7   3  -7   37415    3529   1
   3   7   7   32901    3529  -2
   7   3  -7   32901    3529   1
   3   7   7   36112    3529  -2
   7   3  -7   36112    3529   1
   3   7   7   36620    3529  -2
   7   3  -7   36620    3529   1
  -7  -3   7   35221    3529  -2
  -3  -7  -7   35221    3529   1
   7   7   3   38337    3529  -2
   7   7  -3   38337    3529   1
   3  -7  -7   41770    3529  -2
  -7   3   7   41770    3529   1
   7   7   3   37447    3529  -2
   7   7  -3   37447    3529   1
   7   7   3   38178    3529  -2
   7   7  -3   38178    3529   1
   7   7   3   38845    3529  -2
   7   7  -3   38845    3529   1
   7  -3  -7   39195    3529  -2
  -3   7   7   39195    3529   1
   7   3   7   35571    3529  -2
   3   7  -7   35571    3529   1
   7  -7  -3   35444    3529  -2
  -7   7   3   35444    3529   1
   7  -7  -3   36175    3560  -2
  -7   7   3   36175    3560   1
  -7  -3   7   42310    3529  -2
  -3  -7  -7   42310    3529   1
   7   3   7   37828    3529  -2
   3   7  -7   37828    3529   1
  -7  -3   7   39736    3529  -2
  -3  -7  -7   39736    3529   1
   7   3   7   37638    3529  -2
   3   7  -7   37638    3529   1
   7  -3  -7   36175    3529  -2
  -3   7   7   36175    3529   1
   7   7   3   39195    3529  -2
   7   7  -3   39195    3529   1
   7  -3   7   44313    3529  -2
  -3   7  -7   44313    3529   1
   7  -7   3   40435    3529  -2
  -7   7  -3   40435    3529   1
   7  -3   7   41357    3560  -2
  -3   7  -7   41357    3560   1
   3  -7   7   41961    3529  -2
  -7   3  -7   41961    3529   1
  -7   3   7   35158    3529  -2
   3  -7  -7   35158    3529   1
  -7   3   7   33124    3529  -2
   3  -7  -7   33124    3529   1
   7  -7   3   42787    3529  -2
  -7   7  -3   42787    3529   1
   7  -3   7   40721    3560  -2
  -3   7  -7   40721    3560   1
  -7  -3  -7   33569    3529  -2
  -3  -7   7   33569    3529   1
   7   3  -7   38400    3529  -2
   3   7   7   38400    3529   1
   7   3  -7   39036    3529  -2
   3   7   7   39036    3529   1
  -7   3   7   38655    3529  -2
   3  -7  -7   38655    3529   1
  -3   7   7   34427    3529  -2
   7  -3  -7   34427    3529   1
  -3   7   7   37987    3529  -2
   7  -3  -7   37987    3529   1
  -3   7   7   40784    3529  -2
   7  -3  -7   40784    3529   1
   3  -7   7   42056    3529  -2
  -7   3  -7   42056    3529   1
   3  -7   7   42215    3529  -2
  -7   3  -7   42215    3529   1
   3  -7   7   42183    3529  -2
  -7   3  -7   42183    3529   1
   3  -7   7   42787    3529  -2
  -7   3  -7   42787    3529   1
   3  -7   7   38973    3529  -2
  -7   3  -7   38973    3529   1
   3   7  -7   37447    3529  -2
   7   3   7   37447    3529   1
   3  -7   7   43264    3529  -2
  -7   3  -7   43264    3529   1
  -3   7   7   35444    3529  -2
   7  -3  -7   35444    3529   1
   7  -7   3   39418    3560  -2
  -7   7  -3   39418    3560   1
   7  -7   3   40212    3529  -2
  -7   7  -3   40212    3529   1
   7  -7   3   39831    3529  -2
  -7   7  -3   39831    3529   1
  -3  -7  -7   37542    3529  -2
  -7  -3   7   37542    3529   1
   7   7  -3   38750    3529  -2
   7   7   3   38750    3529   1
   7   7  -3   35063    3529  -2
   7   7   3   35063    3529   1
   7   7  -3   35953    3529  -2
   7   7   3   35953    3529   1
  -7  -7   4    3242     318  -2
  -7  -7  -4    3242     318   1
  -7  -7   4    2861     318  -2
  -7  -7  -4    2861     318   1
  -4  -7   7    2543     286  -2
  -7  -4  -7    2543     286   1
  -4  -7   7    2257     286  -2
  -7  -4  -7    2257     286   1
   7   7   4    3147     318  -2
   7   7  -4    3147     318   1
   7   7   4    3274     286  -2
   7   7  -4    3274     286   1
   7   7   4    3306     286  -2
   7   7  -4    3306     286   1
   7   7   4    3497     286  -2
   7   7  -4    3497     286   1
   7   7   4    3338     286  -2
   7   7  -4    3338     286   1
   7   7   4    3179     318  -2
   7   7  -4    3179     318   1
   4   7   7    2734     286  -2
   7   4  -7    2734     286   1
   4  -7  -7    3465     318  -2
  -7   4   7    3465     318   1
   4  -7  -7    3179     318  -2
  -7   4   7    3179     318   1
   4   7   7    2893     286  -2
   7   4  -7    2893     286   1
   4   7   7    2670     286  -2
   7   4  -7    2670     286   1
  -7  -4   7    3147     318  -2
  -4  -7  -7    3147     318   1
   4   7   7    2543     286  -2
   7   4  -7    2543     286   1
   7   4   7    2893     286  -2
   4   7  -7    2893     286   1
   7   4   7    2766     286  -2
   4   7  -7    2766     286   1
   7  -7  -4    2352     286  -2
  -7   7   4    2352     286   1
   4   7   7    2670     318  -2
   7   4  -7    2670     318   1
  -7  -4   7    3688     318  -2
  -4  -7  -7    3688     318   1
  -7  -4   7    2893     286  -2
  -4  -7  -7    2893     286   1
   7  -4  -7    2797     318  -2
  -4   7   7    2797     318   1
   7   4   7    2384     286  -2
   4   7  -7    2384     286   1
   7  -4  -7    2638     318  -2
  -4   7   7    2638     318   1
   7  -7   4    2670     318  -2
  -7   7  -4    2670     318   1
   7  -7   4    2893     318  -2
  -7   7  -4    2893     318   1
   4  -7   7    2925     318  -2
  -7   4  -7    2925     318   1
   7  -4   7    2638     318  -2
  -4   7  -7    2638     318   1
   7  -4   7    2988     286  -2
  -4   7  -7    2988     286   1
   7  -4   7    3052     286  -2
  -4   7  -7    3052     286   1
   7  -4   7    2829     286  -2
  -4   7  -7    2829     286   1
   7  -4   7    2829     286  -2
  -4   7  -7    2829     286   1
  -7   4   7    2861     286  -2
   4  -7  -7    2861     286   1
  -7   4   7    2607     286  -2
   4  -7  -7    2607     286   1
  -7   4   7    2861     318  -2
   4  -7  -7    2861     318   1
   7  -7   4    2893     286  -2
  -7   7  -4    2893     286   1
   7  -7   4    2638     286  -2
  -7   7  -4    2638     286   1
  -7  -4  -7    2797     318  -2
  -4  -7   7    2797     318   1
   7   4  -7    3242     318  -2
   4   7   7    3242     318   1
   7   4  -7    3274     286  -2
   4   7   7    3274     286   1
  -4   7   7    2988     286  -2
   7  -4  -7    2988     286   1
  -4   7   7    3465     318  -2
   7  -4  -7    3465     318   1
  -4   7   7    3370     286  -2
   7  -4  -7    3370     286   1
   4  -7   7    2893     286  -2
  -7   4  -7    2893     286   1
   7  -4   7    2861     318  -2
  -4   7  -7    2861     318   1
   7  -4   7    2638     286  -2
  -4   7  -7    2638     286   1
   7  -7   4    2384     318  -2
  -7   7  -4    2384     318   1
   7  -7   4    2670     286  -2
  -7   7  -4    2670     286   1
  -4  -7  -7    2448     318  -2
  -7  -4   7    2448     318   1
   4  -7   7    3052     318  -2
  -7   4  -7    3052     318   1
   4  -7   7    3306     286  -2
  -7   4  -7    3306     286   1
   4  -7   7    2829     286  -2
  -7   4  -7    2829     286   1
   4  -7   7    2988     286  -2
  -7   4  -7    2988     286   1
   4  -7   7    3211     318  -2
  -7   4  -7    3211     318   1
   7   7  -4    3465     286  -2
   7   7   4    3465     286   1
   7   7  -4    2766     286  -2
   7   7   4    2766     286   1
   7   7  -4    3560     286  -2
   7   7   4    3560     286   1
  -7  -7   5  103853    8424  -2
  -7  -7  -5  103853    8424   1
  -7  -7   5   98862    8424  -2
  -7  -7  -5   98862    8424   1
  -5  -7   7   87609    8424  -2
  -7  -5  -7   87609    8424   1
  -5  -7   7   90247    8424  -2
  -7  -5  -7   90247    8424   1
   7   7   5   87005    8424  -2
   7   7  -5   87005    8424   1
   7   7   5   90819    8424  -2
   7   7  -5   90819    8424   1
   7   7   5   94761    8424  -2
   7   7  -5   94761    8424   1
   5   7   7   89993    8424  -2
   7   5  -7   89993    8424   1
   5   7   7  101373    8424  -2
   7   5  -7  101373    8424   1
   5   7   7   92441    8424  -2
   7   5  -7   92441    8424   1
   5   7   7   96828    8424  -2
   7   5  -7   96828    8424   1
   5   7   7   92123    8424  -2
   7   5  -7   92123    8424   1
   5  -7  -7   87386    8424  -2
  -7   5   7   87386    8424   1
   7   7   5   95492    8424  -2
   7   7  -5   95492    8424   1
   7   7   5   87068    8424  -2
   7   7  -5   87068    8424   1
   7   7   5  105251    8424  -2
   7   7  -5  105251    8424   1
   7   5   7   90025    8424  -2
   5   7  -7   90025    8424   1
   7   5   7   86592    8424  -2
   5   7  -7   86592    8424   1
   7  -5  -7   94125    8424  -2
  -5   7   7   94125    8424   1
   7  -7  -5   88372    8424  -2
  -7   7   5   88372    8424   1
  -7  -5   7   95620    8424  -2
  -5  -7  -7   95620    8424   1
  -7  -5   7   88086    8424  -2
  -5  -7  -7   88086    8424   1
  -7  -5   7   94062    8424  -2
  -5  -7  -7   94062    8424   1
   7  -5  -7   91137    8456  -2
  -5   7   7   91137    8456   1
   7   5   7   90724    8424  -2
   5   7  -7   90724    8424   1
   7  -5   7   89262    8424  -2
  -5   7  -7   89262    8424   1
   7  -7   5   92727    8424  -2
  -7   7  -5   92727    8424   1
   7  -5   7   89802    8424  -2
  -5   7  -7   89802    8424   1
   7  -5   7   96255    8424  -2
  -5   7  -7   96255    8424   1
   7  -7   5   89453    8424  -2
  -7   7  -5   89453    8424   1
   7  -5   7   91551    8424  -2
  -5   7  -7   91551    8424   1
  -7   5   7   97304    8424  -2
   5  -7  -7   97304    8424   1
  -7   5   7   91678    8424  -2
   5  -7  -7   91678    8424   1
  -7   5   7   95047    8424  -2
   5  -7  -7   95047    8424   1
  -7  -5  -7   88372    8424  -2
  -5  -7   7   88372    8424   1
   7  -5   7   90311    8424  -2
  -5   7  -7   90311    8424   1
   7  -7   5   84494    8424  -2
  -7   7  -5   84494    8424   1
   7   5  -7   91296    8424  -2
   5   7   7   91296    8424   1
  -7   7   5  100801    8456  -2
   7  -7  -5  100801    8456   1
  -5   7   7   78994    8424  -2
   7  -5  -7   78994    8424   1
  -5   7   7   84653    8424  -2
   7  -5  -7   84653    8424   1
  -5   7   7   95302    8424  -2
   7  -5  -7   95302    8424   1
  -5   7   7   94984    8424  -2
   7  -5  -7   94984    8424   1
   5  -7   7   83476    8424  -2
  -7   5  -7   83476    8424   1
   5  -7   7   87386    8424  -2
  -7   5  -7   87386    8424   1
   5  -7   7   84112    8424  -2
  -7   5  -7   84112    8424   1
   5  -7   7   92123    8424  -2
  -7   5  -7   92123    8424   1
   5  -7   7   82141    8424  -2
  -7   5  -7   82141    8424   1
   5   7  -7   87355    8424  -2
   7   5   7   87355    8424   1
   7  -7   5   85002    8456  -2
  -7   7  -5   85002    8456   1
   7  -7   5   90311    8424  -2
  -7   7  -5   90311    8424   1
   7  -7   5   91328    8424  -2
  -7   7  -5   91328    8424   1
  -5  -7  -7   95683    8424  -2
  -7  -5   7   95683    8424   1
   5  -7   7   87323    8424  -2
  -7   5  -7   87323    8424   1
   5  -7   7   87800    8424  -2
  -7   5  -7   87800    8424   1
   7   7  -5  103789    8424  -2
   7   7   5  103789    8424   1
   7   7  -5   97431    8424  -2
   7   7   5   97431    8424   1
  -7  -7   6    5023     477  -2
  -7  -7  -6    5023     477   1
  -7  -7   6    4864     477  -2
  -7  -7  -6    4864     477   1
   7   7   6    4673     477  -2
   7   7  -6    4673     477   1
  -6  -7   7    5690     477  -2
  -7  -6  -7    5690     477   1
  -6  -7   7    5340     477  -2
  -7  -6  -7    5340     477   1
   7   7   6    4578     477  -2
   7   7  -6    4578     477   1
   7   7   6    4482     477  -2
   7   7  -6    4482     477   1
   7   7   6    4133     477  -2
   7   7  -6    4133     477   1
   6   7   7    5245     477  -2
   7   6  -7    5245     477   1
   6   7   7    4864     509  -2
   7   6  -7    4864     509   1
   6   7   7    4991     477  -2
   7   6  -7    4991     477   1
   6   7   7    5118     477  -2
   7   6  -7    5118     477   1
   6  -7  -7    4609     477  -2
  -7   6   7    4609     477   1
   7   7   6    4673     477  -2
   7   7  -6    4673     477   1
   7   6   7    4864     477  -2
   6   7  -7    4864     477   1
   7   7   6    4736     477  -2
   7   7  -6    4736     477   1
   7   7   6    4291     509  -2
   7   7  -6    4291     509   1
   7   6   7    4959     477  -2
   6   7  -7    4959     477   1
   7  -6  -7    5150     509  -2
  -6   7   7    5150     509   1
   7  -7  -6    5182     509  -2
  -7   7   6    5182     509   1
  -7  -6   7    4578     477  -2
  -6  -7  -7    4578     477   1
  -7  -6   7    4578     477  -2
  -6  -7  -7    4578     477   1
   7  -6  -7    5118     509  -2
  -6   7   7    5118     509   1
   6   7   7    4673     477  -2
   7   6  -7    4673     477   1
   7   6   7    4641     477  -2
   6   7  -7    4641     477   1
   7   6   7    5468     477  -2
   6   7  -7    5468     477   1
   7  -6   7    5277     477  -2
  -6   7  -7    5277     477   1
   7  -6   7    5245     509  -2
  -6   7  -7    5245     509   1
   7  -6   7    5499     477  -2
  -6   7  -7    5499     477   1
   7  -7   6    5531     477  -2
  -7   7  -6    5531     477   1
  -7  -6  -7    5023     509  -2
  -6  -7   7    5023     509   1
  -7   6   7    4927     477  -2
   6  -7  -7    4927     477   1
  -7   6   7    4609     477  -2
   6  -7  -7    4609     477   1
  -7   6   7    5118     509  -2
   6  -7  -7    5118     509   1
   7  -7   6    5531     477  -2
  -7   7  -6    5531     477   1
   7  -6   7    4959     477  -2
  -6   7  -7    4959     477   1
   7  -6   7    5627     509  -2
  -6   7  -7    5627     509   1
   7  -7   6    5340     509  -2
  -7   7  -6    5340     509   1
   7   6  -7    4800     477  -2
   6   7   7    4800     477   1
  -7   7   6    5182     509  -2
   7  -7  -6    5182     509   1
  -6   7   7    4705     477  -2
   7  -6  -7    4705     477   1
  -6   7   7    5118     477  -2
   7  -6  -7    5118     477   1
  -6   7   7    5436     509  -2
   7  -6  -7    5436     509   1
   7  -6   7    5118     477  -2
  -6   7  -7    5118     477   1
   6  -7   7    5277     509  -2
  -7   6  -7    5277     509   1
   6  -7   7    4736     477  -2
  -7   6  -7    4736     477   1
   6  -7   7    5150     509  -2
  -7   6  -7    5150     509   1
   6  -7   7    5054     477  -2
  -7   6  -7    5054     477   1
   6   7  -7    5340     477  -2
   7   6   7    5340     477   1
   7  -7   6    5086     509  -2
  -7   7  -6    5086     509   1
  -7  -7  -6    4609     477  -2
  -7  -7   6    4609     477   1
   7  -7   6    5372     509  -2
  -7   7  -6    5372     509   1
   7  -7   6    4864     477  -2
  -7   7  -6    4864     477   1
  -6  -7  -7    5213     509  -2
  -7  -6   7    5213     509   1
   6  -7   7    5213     477  -2
  -7   6  -7    5213     477   1
   6  -7   7    4736     477  -2
  -7   6  -7    4736     477   1
   7   7  -6    4641     477  -2
   7   7   6    4641     477   1
  -7  -7   7   11444    1113  -2
  -7  -7  -7   11444    1113   1
  -7  -7   7   11762    1113  -2
  -7  -7  -7   11762    1113   1
   7   7   7   10268    1113  -2
   7   7  -7   10268    1113   1
   7   7   7   10522    1113  -2
   7   7  -7   10522    1113   1
   7   7   7   11698    1113  -2
   7   7  -7   11698    1113   1
   7   7   7   12080    1113  -2
   7   7  -7   12080    1113   1
   7   7   7   10331    1113  -2
   7   7  -7   10331    1113   1
   7   7   7   11603    1113  -2
   7   7  -7   11603    1113   1
   7  -7  -7   12556    1113  -2
  -7   7   7   12556    1113   1
  -7   7   7   11762    1113  -2
   7  -7  -7   11762    1113   1
  -7   7   7   12302    1113  -2
   7  -7  -7   12302    1113   1
  -7   7   7   13733    1113  -2
   7  -7  -7   13733    1113   1
   7  -7   7   14527    1113  -2
  -7   7  -7   14527    1113   1
   7   7  -7   10935    1113  -2
   7   7   7   10935    1113   1
   0  -8   0   15576    1431  -2
  -8   0   0   15576    1431   1
  -8   0   0   15672    1494  -2
   0  -8   0   15672    1494   1
  -8   0   0   16530    1431  -2
   0  -8   0   16530    1431   1
   0   0   8   15544    1462  -2
   0   0  -8   15544    1462   1
   0   0   8   14400    1431  -2
   0   0  -8   14400    1431   1
   8   0   0   15799    1462  -2
   0   8   0   15799    1462   1
   8   0   0   14750    1462  -2
   0   8   0   14750    1462   1
   8   0   0   16498    1462  -2
   0   8   0   16498    1462   1
   0   8   0   15958    1462  -2
   8   0   0   15958    1462   1
   0   8   0   15449    1462  -2
   8   0   0   15449    1462   1
   8   1   0    1399     159   1
   8  -1   0    1272     127   1
   8  -1   0    1272     127   1
   8   1   0    1431     159   1
   1   0  -8    1685     159   1
   1   0  -8    1113     127   1
   1   0   8    1240     159   1
   0   8   1    1367     159   1
   0   8   1    1653     159   1
  -8   1   0    1272     159   1
  -1   0  -8    1526     159   1
  -1   0  -8    1113     127   1
   0  -8  -1    1303     159   1
   0  -8  -1    1176     127   1
   0  -8   1    1176     127   1
   0   8  -1    1589     159   1
   0   8  -1    1526     159   1
  -8   0   2  163424   16943  -2
   0  -8  -2  163424   16943   1
  -8   0   2  184468   16943  -2
   0  -8  -2  184468   16943   1
   0  -2   8  175504   16943  -2
  -2   0  -8  175504   16943   1
   2  -8   0  174645   16943  -2
  -8   2   0  174645   16943   1
   0  -2   8  184945   16943  -2
  -2   0  -8  184945   16943   1
  -2   8   0  205734   16943  -2
   8  -2   0  205734   16943   1
   2   8   0  180558   16943  -2
   8   2   0  180558   16943   1
   2   8   0  195372   16943  -2
   8   2   0  195372   16943   1
   8   0   2  192288   16943  -2
   0   8  -2  192288   16943   1
   0   2   8  164505   16943  -2
   2   0  -8  164505   16943   1
  -2   8   0  194291   16943  -2
   8  -2   0  194291   16943   1
   0   2   8  190889   16943  -2
   2   0  -8  190889   16943   1
  -8   0  -2  193591   16943  -2
   0  -8   2  193591   16943   1
   8   0   2  189236   16943  -2
   0   8  -2  189236   16943   1
   8   0   2  157957   16943  -2
   0   8  -2  157957   16943   1
   8   0  -2  199440   16943  -2
   0   8   2  199440   16943   1
   8   0  -2  186121   16943  -2
   0   8   2  186121   16943   1
  -8   3   0    1780     159   1
  -8   3   0    1462     159   1
   8   3   0    1558     159   1
   8   3   0    1621     159   1
   8   3   0    1272     159   1
   8  -3   0    1144     159   1
   0  -8   3    1144     159   1
   0   8   3    1144     159   1
   0   8   3    1780     191   1
   3   0  -8    1621     159   1
   3   0  -8    1621     191   1
   3   0  -8    1367     159   1
   8  -3   0    1113     127   1
   0   8  -3    1494     159   1
  -3   0  -8    1240     159   1
   0   8  -3    1558     159   1
   0   8  -3    1748     191   1
   0   8  -3    1462     159   1
   0   8  -3    1685     191   1
   0  -4   8    8265     731  -2
  -4   0  -8    8265     731   1
   8   0   4    8265     731  -2
   0   8  -4    8265     731   1
  -8   0  -4    7788     763  -2
   0  -8   4    7788     763   1
   8   0   4    8170     763  -2
   0   8  -4    8170     763   1
   8   0   4    8805     731  -2
   0   8  -4    8805     731   1
   8   0   4    8265     731  -2
   0   8  -4    8265     731   1
   4   8   0    7089     731  -2
   8   4   0    7089     731   1
   4   8   0    6421     731  -2
   8   4   0    6421     731   1
  -4   8   0    8456     731  -2
   8  -4   0    8456     731   1
  -4   8   0    8742     731  -2
   8  -4   0    8742     731   1
   0   4   8    6771     731  -2
   4   0  -8    6771     731   1
   0   4  -8    8138     763  -2
   4   0   8    8138     763   1
   8   0  -4    6898     731  -2
   0   8   4    6898     731   1
   8   0  -4    6739     731  -2
   0   8   4    6739     731   1
   8   0  -4    7184     731  -2
   0   8   4    7184     731   1
   0  -4   8    8329     731  -2
  -4   0  -8    8329     731   1
   0  -4   8    7915     731  -2
  -4   0  -8    7915     731   1
   0   4   8    6803     731  -2
   4   0  -8    6803     731   1
   4  -8   0    8265     731  -2
  -8   4   0    8265     731   1
   0   8  -5    6993     668   1
  -8   5   0    7184     668   1
   5   0   8    6676     668   1
   0   8  -5    6358     636   1
   0   8  -5    5849     636   1
   0   8  -5    7089     668   1
   0   8  -5    6421     636   1
   0   8  -5    7438     668   1
   8   5   0    6866     636   1
   8   5   0    7407     636   1
  -5   0  -8    6707     668   1
   8   5   0    7343     636   1
  -8   5   0    6866     636   1
  -5   0  -8    7661     668   1
   5   0  -8    6072     636   1
   5   0  -8    6707     636   1
   0   8   5    6517     668   1
   8   0   6  673119   55598  -2
   0   8  -6  673119   55598   1
   0   6   8  630014   55630  -2
   6   0  -8  630014   55630   1
   0   6   8  596223   55598  -2
   6   0  -8  596223   55598   1
   0   6  -8  606872   55630  -2
   6   0   8  606872   55630   1
   6   8   0  649214   55598  -2
   8   6   0  649214   55598   1
   6   8   0  587609   55598  -2
   8   6   0  587609   55598   1
   6   8   0  640059   55598  -2
   8   6   0  640059   55598   1
   0  -6   8  569362   55598  -2
  -6   0  -8  569362   55598   1
   0  -6   8  618761   55598  -2
  -6   0  -8  618761   55598   1
   0  -6   8  595556   55598  -2
  -6   0  -8  595556   55598   1
   0   6   8  532392   55598  -2
   6   0  -8  532392   55598   1
   8   0   6  655318   55598  -2
   0   8  -6  655318   55598   1
  -8   0   6  523078   55598  -2
   0  -8  -6  523078   55598   1
   8   0   6  596764   55598  -2
   0   8  -6  596764   55598   1
  -8   7   0    1272     191   1
  -8   7   0    1367     159   1
  -7   0  -8    1367     159   1
  -7   0  -8    1049     127   1
  -7   0  -8    1144     159   1
   0   8  -7    1367     191   1
   0   8  -7    1113     127   1
   0   8  -7    1240     159   1
   0   8  -7    1431     159   1
   7   0  -8    1240     159   1
   0   8  -7    1144     127   1
   0   8  -7    1367     159   1
   0   8   7    1272     159   1
   7   0  -8    1176     127   1
   7   0  -8    1272     159   1
   7   0  -8    1049     159   1
  -8   7   0     922     127   1
   0  -8  -7    1208     159   1
   0  -8  -7     890     127   1
   8   7   0     763     127   1
   8   7   0    1272     159   1
  -7   0  -8    1113     159   1
   7   0   8    1272     191   1
   8   7   0    1144     127   1
   7   0  -8    1303     159   1
   0  -8  -7    1272     159   1
   1   8   1   19836    1780  -2
   8   1  -1   19836    1780   1
  -8  -1   1   21394    1812  -2
  -1  -8  -1   21394    1812   1
  -8   1  -1   18564    1780  -2
   1  -8   1   18564    1780   1
   8  -1  -1   17611    1812  -2
  -1   8   1   17611    1812   1
   8  -1  -1   17738    1780  -2
  -1   8   1   17738    1780   1
   1   1   8   16784    1812  -2
   1   1  -8   16784    1812   1
   1  -8  -1   19423    1812  -2
  -8   1   1   19423    1812   1
   8   1   1   21012    1812  -2
   1   8  -1   21012    1812   1
   8   1   1   20726    1812  -2
   1   8  -1   20726    1812   1
   8   1   1   22156    1812  -2
   1   8  -1   22156    1812   1
  -8  -1   1   19995    1812  -2
  -1  -8  -1   19995    1812   1
   1   8   1   21489    1812  -2
   8   1  -1   21489    1812   1
  -1   8  -1   19168    1780  -2
   8  -1   1   19168    1780   1
  -1  -1   8   19327    1812  -2
  -1  -1  -8   19327    1812   1
   1   8   1   21330    1812  -2
   8   1  -1   21330    1812   1
  -1   8  -1   18978    1780  -2
   8  -1   1   18978    1780   1
  -1   1  -8   19041    1780  -2
   1  -1   8   19041    1780   1
   1   1   8   16307    1780  -2
   1   1  -8   16307    1780   1
   1   8  -1   19709    1780  -2
   8   1   1   19709    1780   1
   8   1  -1   18628    1812  -2
   1   8   1   18628    1812   1
   8   1  -1   20567    1812  -2
   1   8   1   20567    1812   1
  -1   8   1   20122    1780  -2
   8  -1  -1   20122    1780   1
  -1   8   1   20980    1780  -2
   8  -1  -1   20980    1780   1
   1  -8   1   17611    1812  -2
  -8   1  -1   17611    1812   1
  -1   1   8   21394    1812  -2
   1  -1  -8   21394    1812   1
   1  -1   8   17770    1780  -2
  -1   1  -8   17770    1780   1
   8   1  -1   20885    1812  -2
   1   8   1   20885    1812   1
  -8  -1  -1   21362    1812  -2
  -1  -8   1   21362    1812   1
   8  -1   1   18406    1780  -2
  -1   8  -1   18406    1780   1
   1  -1   8   18119    1812  -2
  -1   1  -8   18119    1812   1
   8  -1   1   17738    1812  -2
  -1   8  -1   17738    1812   1
   8  -1   1   17929    1812  -2
  -1   8  -1   17929    1812   1
   1   8  -1   18596    1780  -2
   8   1   1   18596    1780   1
   8   1   2   20980    2162  -2
   1   8  -2   20980    2162   1
  -1   2  -8   26575    2130  -2
   2  -1   8   26575    2130   1
   8   1   2   24445    2130  -2
   1   8  -2   24445    2130   1
  -8   1  -2   25844    2130  -2
   1  -8   2   25844    2130   1
   8   1   2   24254    2130  -2
   1   8  -2   24254    2130   1
   8   1   2   24127    2130  -2
   1   8  -2   24127    2130   1
  -1   2  -8   24064    2162  -2
   2  -1   8   24064    2162   1
  -8  -1   2   22602    2130  -2
  -1  -8  -2   22602    2130   1
   2   8   1   21235    2130  -2
   8   2  -1   21235    2130   1
   8   1   2   24159    2130  -2
   1   8  -2   24159    2130   1
   1   2   8   21362    2130  -2
   2   1  -8   21362    2130   1
   2  -8  -1   23841    2130  -2
  -8   2   1   23841    2130   1
   2  -8  -1   22474    2130  -2
  -8   2   1   22474    2130   1
  -1  -2   8   23619    2130  -2
  -2  -1  -8   23619    2130   1
  -1  -2   8   21108    2130  -2
  -2  -1  -8   21108    2130   1
   1   2   8   20345    2130  -2
   2   1  -8   20345    2130   1
   8  -1  -2   20631    2130  -2
  -1   8   2   20631    2130   1
   8  -1  -2   20790    2130  -2
  -1   8   2   20790    2130   1
   2   8   1   22156    2130  -2
   8   2  -1   22156    2130   1
  -8  -1   2   24731    2130  -2
  -1  -8  -2   24731    2130   1
   1   2   8   20631    2130  -2
   2   1  -8   20631    2130   1
   2   8   1   20917    2130  -2
   8   2  -1   20917    2130   1
  -1   2   8   22665    2130  -2
   2  -1  -8   22665    2130   1
   2   8  -1   21330    2130  -2
   8   2   1   21330    2130   1
   2  -8   1   22824    2130  -2
  -8   2  -1   22824    2130   1
   8   1  -2   22729    2130  -2
   1   8   2   22729    2130   1
  -8  -1  -2   24827    2130  -2
  -1  -8   2   24827    2130   1
   8  -1   2   25812    2162  -2
  -1   8  -2   25812    2162   1
   8  -1   2   23174    2162  -2
  -1   8  -2   23174    2162   1
   1  -2   8   23396    2130  -2
  -2   1  -8   23396    2130   1
   1  -2   8   24763    2130  -2
  -2   1  -8   24763    2130   1
   2  -8   1   23206    2130  -2
  -8   2  -1   23206    2130   1
   2   8  -1   20980    2130  -2
   8   2   1   20980    2130   1
   8  -1   2   25812    2130  -2
  -1   8  -2   25812    2130   1
   8   1  -2   22633    2130  -2
   1   8   2   22633    2130   1
  -1  -3   8    2384     286  -2
  -3  -1  -8    2384     286   1
   1   3   8    2734     318  -2
   3   1  -8    2734     318   1
   1   3   8    3529     286  -2
   3   1  -8    3529     286   1
   1   3   8    2925     318  -2
   3   1  -8    2925     318   1
   1   3   8    3115     286  -2
   3   1  -8    3115     286   1
   3  -8  -1    2416     286  -2
  -8   3   1    2416     286   1
   8   1   3    2575     286  -2
   1   8  -3    2575     286   1
   8   1   3    2861     286  -2
   1   8  -3    2861     286   1
  -3  -8   1    3465     318  -2
  -8  -3  -1    3465     318   1
  -1   3  -8    3401     318  -2
   3  -1   8    3401     318   1
   8  -1  -3    3401     318  -2
  -1   8   3    3401     318   1
   8  -1  -3    3115     318  -2
  -1   8   3    3115     318   1
   8  -1  -3    3433     286  -2
  -1   8   3    3433     286   1
  -8  -1   3    3274     318  -2
  -1  -8  -3    3274     318   1
  -8   1  -3    3147     286  -2
   1  -8   3    3147     286   1
   8   1   3    2893     286  -2
   1   8  -3    2893     286   1
   8   1   3    2607     318  -2
   1   8  -3    2607     318   1
  -1   3   8    3751     318  -2
   3  -1  -8    3751     318   1
   3  -8   1    2511     286  -2
  -8   3  -1    2511     286   1
   3  -8   1    2384     286  -2
  -8   3  -1    2384     286   1
   8  -1   3    2988     318  -2
  -1   8  -3    2988     318   1
   8  -1   3    2766     318  -2
  -1   8  -3    2766     318   1
   8  -1   3    2829     286  -2
  -1   8  -3    2829     286   1
   8  -1   3    2956     318  -2
  -1   8  -3    2956     318   1
   1  -3   8    3211     318  -2
  -3   1  -8    3211     318   1
   1  -3   8    2861     286  -2
  -3   1  -8    2861     286   1
  -1   3   8    2988     286  -2
   3  -1  -8    2988     286   1
  -8  -1  -3    2384     286  -2
  -1  -8   3    2384     286   1
   3   8  -1    3242     286  -2
   8   3   1    3242     286   1
   8  -1  -4     191      95  -2
  -1   8   4     191      95   1
   4   8   1     223      64  -2
   8   4  -1     223      64   1
   4   8   1     286      64  -2
   8   4  -1     286      64   1
  -4  -8   1     254     127  -2
  -8  -4  -1     254     127   1
   8   1   4     509      95  -2
   1   8  -4     509      95   1
   8   1   4     509     127  -2
   1   8  -4     509     127   1
   1   4   8     382      64  -2
   4   1  -8     382      64   1
  -1  -4   8     604      95  -2
  -4  -1  -8     604      95   1
  -1  -4   8     509      95  -2
  -4  -1  -8     509      95   1
  -1  -4   8     509      64  -2
  -4  -1  -8     509      64   1
   8   1   4     509      64  -2
   1   8  -4     509      64   1
   1   4   8     350      64  -2
   4   1  -8     350      64   1
   4  -8  -1     445      95  -2
  -8   4   1     445      95   1
  -8   1  -4     318     127  -2
   1  -8   4     318     127   1
   8  -1  -4     382      95  -2
  -1   8   4     382      95   1
   8  -1  -4     318      64  -2
  -1   8   4     318      64   1
   4  -8  -1     318      95  -2
  -8   4   1     318      95   1
   4   8   1     223      64  -2
   8   4  -1     223      64   1
   8   1   4     572      64  -2
   1   8  -4     572      64   1
   1   4   8     382      64  -2
   4   1  -8     382      64   1
  -1   4  -8     223      95  -2
   4  -1   8     223      95   1
   8  -1   4     223     127  -2
  -1   8  -4     223     127   1
   1  -4   8     223      64  -2
  -4   1  -8     223      64   1
   8   1  -4     382      64  -2
   1   8   4     382      64   1
   4  -8   1     286      95  -2
  -8   4  -1     286      95   1
  -1   4   8     127      64  -2
   4  -1  -8     127      64   1
   8  -1   4     286      64  -2
  -1   8  -4     286      64   1
   8  -1   4     318      95  -2
  -1   8  -4     318      95   1
   8  -1   4     286      95  -2
  -1   8  -4     286      95   1
   8  -1   4     318      64  -2
  -1   8  -4     318      64   1
   8  -1   4     223      64  -2
  -1   8  -4     223      64   1
   8   1  -4     286      95  -2
   1   8   4     286      95   1
  -1   4   8     318      64  -2
   4  -1  -8     318      64   1
   4  -8   1     191      95  -2
  -8   4  -1     191      95   1
   1  -4   8     286      95  -2
  -4   1  -8     286      95   1
   8   1   5     827     127  -2
   1   8  -5     827     127   1
  -1  -5   8    1494     127  -2
  -5  -1  -8    1494     127   1
  -8  -1   5     985     127  -2
  -1  -8  -5     985     127   1
   5   8   1    1303     127  -2
   8   5  -1    1303     127   1
   5  -8  -1     795     159  -2
  -8   5   1     795     159   1
  -8   1  -5    1558     254  -2
   1  -8   5    1558     254   1
   8   1   5    1017     191  -2
   1   8  -5    1017     191   1
   8   1   5    1049     127  -2
   1   8  -5    1049     127   1
   8   1   5    1017     127  -2
   1   8  -5    1017     127   1
   5   8   1    1208     159  -2
   8   5  -1    1208     159   1
   8   1   5     985     127  -2
   1   8  -5     985     127   1
   5  -8  -1     954     159  -2
  -8   5   1     954     159   1
  -1  -5   8     795     127  -2
  -5  -1  -8     795     127   1
   8   1   5    1113     159  -2
   1   8  -5    1113     159   1
   5   8   1    1208     159  -2
   8   5  -1    1208     159   1
   1   5   8    1526     127  -2
   5   1  -8    1526     127   1
  -1  -5   8     985     159  -2
  -5  -1  -8     985     159   1
  -1   5  -8    1240     191  -2
   5  -1   8    1240     191   1
   1  -5   8    1240     159  -2
  -5   1  -8    1240     159   1
   8  -1   5    1462     191  -2
  -1   8  -5    1462     191   1
   1  -5   8     954     127  -2
  -5   1  -8     954     127   1
   1   5  -8    1049     191  -2
   5   1   8    1049     191   1
  -8  -1  -5     890     159  -2
  -1  -8   5     890     159   1
   8   1  -5    1049     127  -2
   1   8   5    1049     127   1
   1  -5   8    1208     159  -2
  -5   1  -8    1208     159   1
   8  -1   5    1399     191  -2
  -1   8  -5    1399     191   1
   8  -1   5    1399     127  -2
  -1   8  -5    1399     127   1
   8  -1   5    1208     159  -2
  -1   8  -5    1208     159   1
   5  -8   1    1144     159  -2
  -8   5  -1    1144     159   1
   8   1  -5    1144     159  -2
   1   8   5    1144     159   1
  -1   5   8    1144     127  -2
   5  -1  -8    1144     127   1
  -1   5   8    1208     127  -2
   5  -1  -8    1208     127   1
   5  -8   1    1017     159  -2
  -8   5  -1    1017     159   1
   5  -8   1    1176     159  -2
  -8   5  -1    1176     159   1
   8   1   6   36207    2925  -2
   1   8  -6   36207    2925   1
   8   1   6   33855    2925  -2
   1   8  -6   33855    2925   1
   6   8   1   33251    2925  -2
   8   6  -1   33251    2925   1
   6  -8  -1   34300    2956  -2
  -8   6   1   34300    2956   1
   6   8   1   28387    2925  -2
   8   6  -1   28387    2925   1
   6  -8  -1   35762    2925  -2
  -8   6   1   35762    2925   1
   6   8   1   33028    2925  -2
   8   6  -1   33028    2925   1
   1   6   8   31057    2925  -2
   6   1  -8   31057    2925   1
  -1   6  -8   29436    2956  -2
   6  -1   8   29436    2956   1
   1   6   8   30580    2925  -2
   6   1  -8   30580    2925   1
   1   6   8   28101    2925  -2
   6   1  -8   28101    2925   1
   1   6   8   31280    2925  -2
   6   1  -8   31280    2925   1
   8   1   6   36271    2925  -2
   1   8  -6   36271    2925   1
   8   1   6   35539    2925  -2
   1   8  -6   35539    2925   1
   8   1   6   34459    2925  -2
   1   8  -6   34459    2925   1
   6  -8  -1   30835    2956  -2
  -8   6   1   30835    2956   1
  -1  -6   8   28164    2925  -2
  -6  -1  -8   28164    2925   1
  -1  -6   8   32456    2956  -2
  -6  -1  -8   32456    2956   1
   6   8   1   31343    2925  -2
   8   6  -1   31343    2925   1
  -1  -6   8   30421    2925  -2
  -6  -1  -8   30421    2925   1
   8  -1  -6   29023    2925  -2
  -1   8   6   29023    2925   1
   8  -1  -6   28896    2956  -2
  -1   8   6   28896    2956   1
   6   8   1   33219    2925  -2
   8   6  -1   33219    2925   1
  -8  -1   6   32202    2925  -2
  -1  -8  -6   32202    2925   1
   6  -8   1   31343    2956  -2
  -8   6  -1   31343    2956   1
  -1   6   8   27719    2925  -2
   6  -1  -8   27719    2925   1
   1  -6   8   29913    2956  -2
  -6   1  -8   29913    2956   1
  -1   6   8   29277    2925  -2
   6  -1  -8   29277    2925   1
   6  -8   1   34045    2925  -2
  -8   6  -1   34045    2925   1
   8  -1   6   33124    2925  -2
  -1   8  -6   33124    2925   1
  -8  -1  -6   36906    3020  -2
  -1  -8   6   36906    3020   1
   1  -6   8   29468    2925  -2
  -6   1  -8   29468    2925   1
   6   8  -1   30549    2925  -2
   8   6   1   30549    2925   1
  -1   6   8   31566    2925  -2
   6  -1  -8   31566    2925   1
   8  -1   6   34331    2925  -2
  -1   8  -6   34331    2925   1
   1   6  -8   32551    2956  -2
   6   1   8   32551    2956   1
   8   1  -6   33473    2925  -2
   1   8   6   33473    2925   1
  -1   6   8   32170    2925  -2
   6  -1  -8   32170    2925   1
   1  -6   8   33283    2925  -2
  -6   1  -8   33283    2925   1
   6   8  -1   31725    2925  -2
   8   6   1   31725    2925   1
   6  -8   1   31471    2925  -2
  -8   6  -1   31471    2925   1
   8  -1   6   33187    2925  -2
  -1   8  -6   33187    2925   1
   8  -1   6   32774    2925  -2
  -1   8  -6   32774    2925   1
   8  -1   6   29849    2956  -2
  -1   8  -6   29849    2956   1
   6   8  -1   27624    2925  -2
   8   6   1   27624    2925   1
  -8   1   6   27497    2925  -2
   1  -8  -6   27497    2925   1
   6  -8   1   32043    2956  -2
  -8   6  -1   32043    2956   1
   8  -1   6   32615    2956  -2
  -1   8  -6   32615    2956   1
   1  -6   8   28419    2925  -2
  -6   1  -8   28419    2925   1
   8   1  -6   34618    2956  -2
   1   8   6   34618    2956   1
  -1   6   8   29309    2956  -2
   6  -1  -8   29309    2956   1
   8  -1   6   30167    2956  -2
  -1   8  -6   30167    2956   1
   8   1   7     413      64  -2
   1   8  -7     413      64   1
   8   1   7     540      95  -2
   1   8  -7     540      95   1
   1   7   8     350      95  -2
   7   1  -8     350      95   1
   7   8   1     413      95  -2
   8   7  -1     413      95   1
   8   1   7     382      95  -2
   1   8  -7     382      95   1
  -8  -1   7     413      95  -2
  -1  -8  -7     413      95   1
   8   1   7     382      95  -2
   1   8  -7     382      95   1
   1   7   8     477     127  -2
   7   1  -8     477     127   1
  -8  -1   7     413      95  -2
  -1  -8  -7     413      95   1
   1   7   8     477      95  -2
   7   1  -8     477      95   1
   7   8   1     477      95  -2
   8   7  -1     477      95   1
   8  -1  -7     699     127  -2
  -1   8   7     699     127   1
   7   8   1     286      95  -2
   8   7  -1     286      95   1
   8   1   7     350     127  -2
   1   8  -7     350     127   1
   7  -8  -1     540      95  -2
  -8   7   1     540      95   1
   7  -8  -1     382     127  -2
  -8   7   1     382     127   1
   1   7   8     604      95  -2
   7   1  -8     604      95   1
  -1  -7   8     382      95  -2
  -7  -1  -8     382      95   1
   8   1   7     540      95  -2
   1   8  -7     540      95   1
  -1  -7   8     382      95  -2
  -7  -1  -8     382      95   1
   7  -8  -1     350     127  -2
  -8   7   1     350     127   1
   1  -7  -8     509     127  -2
  -7   1   8     509     127   1
  -8  -1   7     604     127  -2
  -1  -8  -7     604     127   1
   7   8   1     445      95  -2
   8   7  -1     445      95   1
   7   8   1     509      95  -2
   8   7  -1     509      95   1
  -8  -1   7     318      64  -2
  -1  -8  -7     318      64   1
   7  -8  -1     350      64  -2
  -8   7   1     350      64   1
  -1  -7   8     350      95  -2
  -7  -1  -8     350      95   1
   1   7   8     477      95  -2
   7   1  -8     477      95   1
   7   8   1     382      95  -2
   8   7  -1     382      95   1
   7   8  -1     604      95  -2
   8   7   1     604      95   1
   7  -8   1     413      95  -2
  -8   7  -1     413      95   1
   1  -7   8     382      95  -2
  -7   1  -8     382      95   1
   1  -7   8     540      95  -2
  -7   1  -8     540      95   1
   1  -7   8     382      95  -2
  -7   1  -8     382      95   1
   1   7  -8     318     127  -2
   7   1   8     318     127   1
  -8   1   7     477      95  -2
   1  -8  -7     477      95   1
   8  -1   7     699      95  -2
  -1   8  -7     699      95   1
   7  -8   1     445      95  -2
  -8   7  -1     445      95   1
   8  -1   7     540      95  -2
  -1   8  -7     540      95   1
   1  -7   8     413      95  -2
  -7   1  -8     413      95   1
   7  -8   1     509     127  -2
  -8   7  -1     509     127   1
   7   8  -1     413      95  -2
   8   7   1     413      95   1
   7   8  -1     445      95  -2
   8   7   1     445      95   1
   7  -8   1     477     127  -2
  -8   7  -1     477     127   1
   8  -1   7     763     127  -2
  -1   8  -7     763     127   1
   8  -1   7     413      64  -2
  -1   8  -7     413      64   1
  -1   7   8     636      95  -2
   7  -1  -8     636      95   1
   8  -1   7     668     159  -2
  -1   8  -7     668     159   1
  -1   7   8     350      64  -2
   7  -1  -8     350      64   1
   1  -7   8     540      95  -2
  -7   1  -8     540      95   1
  -1   7   8     382      95  -2
   7  -1  -8     382      95   1
   8   1  -7     509     127  -2
   1   8   7     509     127   1
  -1   7   8     477      95  -2
   7  -1  -8     477      95   1
  -8   1   7     382      95  -2
   1  -8  -7     382      95   1
   8   1  -7     509      95  -2
   1   8   7     509      95   1
   8  -1   7     445      95  -2
  -1   8  -7     445      95   1
  -8   1   7     477      95  -2
   1  -8  -7     477      95   1
   8  -1   7     540      95  -2
  -1   8  -7     540      95   1
   0  -8   2  181003   19868  -2
  -8   0  -2  181003   19868   1
   2   0   8  221311   19868  -2
   0   2  -8  221311   19868   1
  -2   0  -8  224140   19899  -2
   0  -2   8  224140   19899   1
  -2   0  -8  229417   19899  -2
   0  -2   8  229417   19899   1
   8  -2   0  186916   19899  -2
  -2   8   0  186916   19899   1
   8   2   0  221597   19899  -2
   2   8   0  221597   19899   1
   8   2   0  213554   19899  -2
   2   8   0  213554   19899   1
   8   2   0  236569   19868  -2
   2   8   0  236569   19868   1
   8  -2   0  216606   19868  -2
  -2   8   0  216606   19868   1
  -8  -2   0  227414   19868  -2
  -2  -8   0  227414   19868   1
   0   8   2  220548   19868  -2
   8   0  -2  220548   19868   1
  -2   1  -8    7343     699  -2
   1  -2   8    7343     699   1
   8  -2  -1    8488     699  -2
  -2   8   1    8488     699   1
  -2  -1   8    7152     668  -2
  -1  -2  -8    7152     668   1
  -8   2  -1    8170     668  -2
   2  -8   1    8170     668   1
  -2   1  -8    7629     668  -2
   1  -2   8    7629     668   1
   8   2   1    6676     699  -2
   2   8  -1    6676     699   1
   1   8   2    7025     668  -2
   8   1  -2    7025     668   1
   8   2   1    6358     668  -2
   2   8  -1    6358     668   1
[truncated: 5,688,407 more chars]
